# Supplementary material
Source: publisher figshare collection journal article supplement (https://gsajournals.figshare.com/ndownloader/files/11093987)
Supplement: Supplementary file 1 [file 11093987]

	NIRBarcodeNo	ID	TrialUnitID	YEAR	SampleNo	LDAY	LCAROUSEL	LWELL	EXPT	Funit	FROW	FRANGE	FREP	FBAY	TREATMENT	WSCCPrediction	Unit	Dehydrator	GrinderBatch	IEXPT	lrow	lcol	lcarousel	lday	LOCATION	CrossValSet1	CrossValSet1_1	CrossValSet1_2	CrossValSet1_3	CrossValSet1_4	CrossValSet1_5	CrossValSet2	CrossValSet2_1	CrossValSet2_2	CrossValSet2_3	CrossValSet2_4	CrossValSet2_5	pheno	CrossValSet3	CrossValSet3_1	CrossValSet3_2	CrossValSet3_3	CrossValSet3_4	CrossValSet3_5	CrossValSet4	CrossValSet4_1	CrossValSet4_2	CrossValSet4_3	CrossValSet4_4
1	70001	HRZ04_0154	118573	2010	117	1	1	1	W9A10COLE	365	5	61	1	1	IRR	2.0167	g/100g	19/10/2010	LAST	W9A10COLE_IRR	22.5	-21.5	-4.429245283	-4.811320755	COLE	3	2.0167	2.0167	NA	2.0167	2.0167	3	2.0167	2.0167	NA	2.0167	2.0167	2.0167	4	2.0167	2.0167	2.0167	NA	2.0167	3	2.0167	2.0167	NA	2.0167
2	70002	DRYSDALE	123136	2010	1740	1	1	2	W9A10YANA	976	12	8	1	1	IRR	1.584	g/100g	23/10/10 Lucerne	LAST	W9A10YANA_IRR	-36.5	-11	-4.429245283	-4.811320755	YANA	2	1.584	NA	1.584	1.584	1.584	3	1.584	1.584	NA	1.584	1.584	1.584	4	1.584	1.584	1.584	NA	1.584	2	1.584	NA	1.584	1.584
3	70003	VQ2791	118718	2010	159	1	1	3	W9A10COLE	510	7	54	1	1	IRR	1.2376	g/100g	19/10/2010	LAST	W9A10COLE_IRR	15.5	-19.5	-4.429245283	-4.811320755	COLE	3	1.2376	1.2376	NA	1.2376	1.2376	4	1.2376	1.2376	1.2376	NA	1.2376	1.2376	4	1.2376	1.2376	1.2376	NA	1.2376	4	1.2376	1.2376	1.2376	NA
4	70004	VW1929	125658	2010	2612	1	1	4	W9A10YANA	3498	40	66	2	3	RFD	2.096	g/100g	30/10/10 Lucerne	LAST	W9A10YANA_RFD	21.5	17	-4.429245283	-4.811320755	YANA	5	2.096	2.096	2.096	2.096	NA	3	2.096	2.096	NA	2.096	2.096	2.096	2	2.096	NA	2.096	2.096	2.096	2	2.096	NA	2.096	2.096
5	70005	VW3707	124339	2010	2163	1	1	5	W9A10YANA	2179	25	67	2	4	IRR	1.8923	g/100g	30/10/10 Hurricane	LAST	W9A10YANA_IRR	22.5	2	-4.429245283	-4.811320755	YANA	3	1.8923	1.8923	NA	1.8923	1.8923	1	NA	1.8923	1.8923	1.8923	1.8923	1.8923	3	1.8923	1.8923	NA	1.8923	1.8923	5	1.8923	1.8923	1.8923	1.8923
6	70006	WW14072	123002	2010	1694	1	1	6	W9A10YANA	842	10	50	2	3	RFD	1.8802	g/100g	30/10/10 Hurricane	LAST	W9A10YANA_RFD	5.5	-13	-4.429245283	-4.811320755	YANA	5	1.8802	1.8802	1.8802	1.8802	NA	5	1.8802	1.8802	1.8802	1.8802	NA	1.8802	4	1.8802	1.8802	1.8802	NA	1.8802	5	1.8802	1.8802	1.8802	1.8802
7	70007	WW3028_4	125364	2010	2514	1	1	7	W9A10YANA	3204	37	36	1	2	RFD	2.327	g/100g	23/10/10 Hurricane	LAST	W9A10YANA_RFD	-8.5	14	-4.429245283	-4.811320755	YANA	3	2.327	2.327	NA	2.327	2.327	5	2.327	2.327	2.327	2.327	NA	2.327	5	2.327	2.327	2.327	2.327	NA	5	2.327	2.327	2.327	2.327
8	70008	VT1308	119705	2010	532	1	1	8	W9A10COLE	1497	20	53	1	2	RFD	0.85215	g/100g	12/10/2010	LAST	W9A10COLE_RFD	14.5	-6.5	-4.429245283	-4.811320755	COLE	2	0.85215	NA	0.85215	0.85215	0.85215	5	0.85215	0.85215	0.85215	0.85215	NA	0.85215	3	0.85215	0.85215	NA	0.85215	0.85215	3	0.85215	0.85215	NA	0.85215
9	70009	BARHAM	121461	2010	1144	1	1	9	W9A10COLE	3253	43	61	2	4	IRR	1.5282	g/100g	27/10/10 Lucerne	LAST	W9A10COLE_IRR	22.5	16.5	-4.429245283	-4.811320755	COLE	2	1.5282	NA	1.5282	1.5282	1.5282	4	1.5282	1.5282	1.5282	NA	1.5282	1.5282	4	1.5282	1.5282	1.5282	NA	1.5282	5	1.5282	1.5282	1.5282	1.5282
10	70010	WW3028_4	125066	2010	2405	1	1	10	W9A10YANA	2906	34	2	1	1	IRR	2.1167	g/100g	23/10/10 Lucerne	LAST	W9A10YANA_IRR	-42.5	11	-4.429245283	-4.811320755	YANA	3	2.1167	2.1167	NA	2.1167	2.1167	5	2.1167	2.1167	2.1167	2.1167	NA	2.1167	5	2.1167	2.1167	2.1167	2.1167	NA	5	2.1167	2.1167	2.1167	2.1167
11	70011	DERRIMUT	125167	2010	2441	1	1	11	W9A10YANA	3007	35	15	1	1	IRR	1.8734	g/100g	23/10/10 Lucerne	LAST	W9A10YANA_IRR	-29.5	12	-4.429245283	-4.811320755	YANA	4	1.8734	1.8734	1.8734	NA	1.8734	5	1.8734	1.8734	1.8734	1.8734	NA	1.8734	4	1.8734	1.8734	1.8734	NA	1.8734	3	1.8734	1.8734	NA	1.8734
12	70012	VW1174	119940	2010	615	1	1	12	W9A10COLE	1732	23	60	1	2	RFD	1.4214	g/100g	19/10/2010	LAST	W9A10COLE_RFD	21.5	-3.5	-4.429245283	-4.811320755	COLE	3	1.4214	1.4214	NA	1.4214	1.4214	4	1.4214	1.4214	1.4214	NA	1.4214	1.4214	1	NA	1.4214	1.4214	1.4214	1.4214	5	1.4214	1.4214	1.4214	1.4214
13	70013	WW21859	123467	2010	1856	1	1	13	W9A10YANA	1307	15	75	2	4	IRR	1.7394	g/100g	30/10/10 Hurricane	LAST	W9A10YANA_IRR	30.5	-8	-4.429245283	-4.811320755	YANA	5	1.7394	1.7394	1.7394	1.7394	NA	5	1.7394	1.7394	1.7394	1.7394	NA	1.7394	4	1.7394	1.7394	1.7394	NA	1.7394	5	1.7394	1.7394	1.7394	1.7394
14	70014	VW3398	122354	2010	1462	1	1	14	W9A10YANA	194	3	18	1	1	IRR	2.2041	g/100g	23/10/10 Hurricane	LAST	W9A10YANA_IRR	-26.5	-20	-4.429245283	-4.811320755	YANA	2	2.2041	NA	2.2041	2.2041	2.2041	3	2.2041	2.2041	NA	2.2041	2.2041	2.2041	1	NA	2.2041	2.2041	2.2041	2.2041	3	2.2041	2.2041	NA	2.2041
15	70015	334609_1	121924	2010	1302	1	1	15	W9A10COLE	3716	49	68	2	4	IRR	2.1351	g/100g	27/10/10 Lucerne	LAST	W9A10COLE_IRR	29.5	22.5	-4.429245283	-4.811320755	COLE	1	NA	2.1351	2.1351	2.1351	2.1351	3	2.1351	2.1351	NA	2.1351	2.1351	2.1351	5	2.1351	2.1351	2.1351	2.1351	NA	3	2.1351	2.1351	NA	2.1351
16	70016	WW18946	121264	2010	1061	1	1	16	W9A10COLE	3056	41	16	2	4	IRR	1.3631	g/100g	27/10/10 Lucerne	LAST	W9A10COLE_IRR	-22.5	14.5	-4.429245283	-4.811320755	COLE	5	1.3631	1.3631	1.3631	1.3631	NA	3	1.3631	1.3631	NA	1.3631	1.3631	1.3631	5	1.3631	1.3631	1.3631	1.3631	NA	3	1.3631	1.3631	NA	1.3631
17	70017	HRZ04_0161	121143	2010	1033	1	1	17	W9A10COLE	2935	39	47	2	3	RFD	1.9729	g/100g	27/10/10 Lucerne	LAST	W9A10COLE_RFD	8.5	12.5	-4.429245283	-4.811320755	COLE	4	1.9729	1.9729	1.9729	NA	1.9729	2	1.9729	NA	1.9729	1.9729	1.9729	1.9729	1	NA	1.9729	1.9729	1.9729	1.9729	3	1.9729	1.9729	NA	1.9729
18	70018	VU3750	125473	2010	2556	1	1	18	W9A10YANA	3313	38	57	2	3	RFD	2.0275	g/100g	30/10/10 Lucerne	LAST	W9A10YANA_RFD	12.5	15	-4.429245283	-4.811320755	YANA	2	2.0275	NA	2.0275	2.0275	2.0275	1	NA	2.0275	2.0275	2.0275	2.0275	2.0275	2	2.0275	NA	2.0275	2.0275	2.0275	4	2.0275	2.0275	2.0275	NA
19	70019	ATTILA	122384	2010	1473	1	1	19	W9A10YANA	224	3	48	2	3	RFD	2.42	g/100g	30/10/10 Lucerne	LAST	W9A10YANA_RFD	3.5	-20	-4.429245283	-4.811320755	YANA	1	NA	2.42	2.42	2.42	2.42	5	2.42	2.42	2.42	2.42	NA	2.42	3	2.42	2.42	NA	2.42	2.42	1	NA	2.42	2.42	2.42
20	70020	VW2843	121886	2010	1290	1	1	20	W9A10COLE	3678	49	30	2	4	IRR	1.7284	g/100g	27/10/10 Lucerne	LAST	W9A10COLE_IRR	-8.5	22.5	-4.429245283	-4.811320755	COLE	4	1.7284	1.7284	1.7284	NA	1.7284	5	1.7284	1.7284	1.7284	1.7284	NA	1.7284	4	1.7284	1.7284	1.7284	NA	1.7284	5	1.7284	1.7284	1.7284	1.7284
21	70021	VW2705	124792	2010	2307	1	1	21	W9A10YANA	2632	30	80	2	4	IRR	2.0701	g/100g	30/10/10 Hurricane	LAST	W9A10YANA_IRR	35.5	7	-4.429245283	-4.811320755	YANA	5	2.0701	2.0701	2.0701	2.0701	NA	2	2.0701	NA	2.0701	2.0701	2.0701	2.0701	2	2.0701	NA	2.0701	2.0701	2.0701	1	NA	2.0701	2.0701	2.0701
22	70022	HRZ05_0283	120785	2010	889	1	1	22	W9A10COLE	2577	34	69	2	3	RFD	1.5429	g/100g	27/10/10 Lucerne	LAST	W9A10COLE_RFD	30.5	7.5	-4.429245283	-4.811320755	COLE	4	1.5429	1.5429	1.5429	NA	1.5429	1	NA	1.5429	1.5429	1.5429	1.5429	1.5429	1	NA	1.5429	1.5429	1.5429	1.5429	4	1.5429	1.5429	1.5429	NA
23	70023	VQ2791	126022	2010	2749	1	1	23	W9A10YANA	3862	44	78	2	4	IRR	1.231	g/100g	30/10/10 Hurricane	LAST	W9A10YANA_IRR	33.5	21	-4.429245283	-4.811320755	YANA	3	1.231	1.231	NA	1.231	1.231	4	1.231	1.231	1.231	NA	1.231	1.231	4	1.231	1.231	1.231	NA	1.231	4	1.231	1.231	1.231	NA
24	70024	VS2177	122904	2010	1651	1	1	24	W9A10YANA	744	9	40	1	2	RFD	2.8504	g/100g	23/10/10 Hurricane	LAST	W9A10YANA_RFD	-4.5	-14	-4.429245283	-4.811320755	YANA	2	2.8504	NA	2.8504	2.8504	2.8504	5	2.8504	2.8504	2.8504	2.8504	NA	2.8504	2	2.8504	NA	2.8504	2.8504	2.8504	2	2.8504	NA	2.8504	2.8504
25	70025	EGA_STAMPEDE	125842	2010	2676	1	1	25	W9A10YANA	3682	42	74	2	4	IRR	1.5693	g/100g	30/10/10 Hurricane	LAST	W9A10YANA_IRR	29.5	19	-4.429245283	-4.811320755	YANA	2	1.5693	NA	1.5693	1.5693	1.5693	1	NA	1.5693	1.5693	1.5693	1.5693	1.5693	2	1.5693	NA	1.5693	1.5693	1.5693	5	1.5693	1.5693	1.5693	1.5693
26	70026	WW20652	120910	2010	933	1	1	26	W9A10COLE	2702	36	42	2	3	RFD	1.2788	g/100g	27/10/10 Lucerne	LAST	W9A10COLE_RFD	3.5	9.5	-4.429245283	-4.811320755	COLE	4	1.2788	1.2788	1.2788	NA	1.2788	1	NA	1.2788	1.2788	1.2788	1.2788	1.2788	2	1.2788	NA	1.2788	1.2788	1.2788	1	NA	1.2788	1.2788	1.2788
27	70027	HRZ06_0141	123912	2010	2010	1	1	27	W9A10YANA	1752	20	80	2	4	IRR	1.8567	g/100g	30/10/10 Hurricane	LAST	W9A10YANA_IRR	35.5	-3	-4.429245283	-4.811320755	YANA	3	1.8567	1.8567	NA	1.8567	1.8567	3	1.8567	1.8567	NA	1.8567	1.8567	1.8567	4	1.8567	1.8567	1.8567	NA	1.8567	1	NA	1.8567	1.8567	1.8567
28	70028	WW19147	119866	2010	584	1	1	28	W9A10COLE	1658	22	62	1	2	RFD	1.1929	g/100g	23/10/10 Lucerne	LAST	W9A10COLE_RFD	23.5	-4.5	-4.429245283	-4.811320755	COLE	5	1.1929	1.1929	1.1929	1.1929	NA	4	1.1929	1.1929	1.1929	NA	1.1929	1.1929	4	1.1929	1.1929	1.1929	NA	1.1929	2	1.1929	NA	1.1929	1.1929
29	70029	HRZ06_0079	118585	2010	126	1	1	29	W9A10COLE	377	5	73	1	1	IRR	1.017	g/100g	19/10/2010	LAST	W9A10COLE_IRR	34.5	-21.5	-4.429245283	-4.811320755	COLE	2	1.017	NA	1.017	1.017	1.017	1	NA	1.017	1.017	1.017	1.017	1.017	3	1.017	1.017	NA	1.017	1.017	4	1.017	1.017	1.017	NA
30	70030	PAVON_DWARF	123510	2010	1870	1	1	30	W9A10YANA	1350	16	30	1	2	RFD	2.3064	g/100g	23/10/10 Lucerne	LAST	W9A10YANA_RFD	-14.5	-7	-4.429245283	-4.811320755	YANA	3	2.3064	2.3064	NA	2.3064	2.3064	2	2.3064	NA	2.3064	2.3064	2.3064	2.3064	1	NA	2.3064	2.3064	2.3064	2.3064	5	2.3064	2.3064	2.3064	2.3064
31	70031	WW20652	118686	2010	152	1	2	1	W9A10COLE	478	7	22	1	1	IRR	1.248	g/100g	12/10/2010	LAST	W9A10COLE_IRR	-16.5	-19.5	-3.429245283	-4.811320755	COLE	4	1.248	1.248	1.248	NA	1.248	1	NA	1.248	1.248	1.248	1.248	1.248	2	1.248	NA	1.248	1.248	1.248	1	NA	1.248	1.248	1.248
32	70032	HRZ06_0514	123398	2010	1830	1	2	2	W9A10YANA	1238	15	6	1	1	IRR	1.3993	g/100g	23/10/10 Lucerne	LAST	W9A10YANA_IRR	-38.5	-8	-3.429245283	-4.811320755	YANA	3	1.3993	1.3993	NA	1.3993	1.3993	5	1.3993	1.3993	1.3993	1.3993	NA	1.3993	4	1.3993	1.3993	1.3993	NA	1.3993	4	1.3993	1.3993	1.3993	NA
33	70033	WW18569	125163	2010	2438	1	2	3	W9A10YANA	3003	35	11	1	1	IRR	1.9126	g/100g	23/10/10 Lucerne	LAST	W9A10YANA_IRR	-33.5	12	-3.429245283	-4.811320755	YANA	5	1.9126	1.9126	1.9126	1.9126	NA	2	1.9126	NA	1.9126	1.9126	1.9126	1.9126	1	NA	1.9126	1.9126	1.9126	1.9126	5	1.9126	1.9126	1.9126	1.9126
34	70034	HRZ04_0191	120160	2010	687	1	2	4	W9A10COLE	1952	26	52	1	2	RFD	1.2866	g/100g	19/10/2010	LAST	W9A10COLE_RFD	13.5	-0.5	-3.429245283	-4.811320755	COLE	5	1.2866	1.2866	1.2866	1.2866	NA	4	1.2866	1.2866	1.2866	NA	1.2866	1.2866	1	NA	1.2866	1.2866	1.2866	1.2866	3	1.2866	1.2866	NA	1.2866
35	70035	65211_176	122078	2010	1359	1	2	5	W9A10COLE	3870	51	70	2	4	IRR	2.1302	g/100g	27/10/10 Lucerne	LAST	W9A10COLE_IRR	31.5	24.5	-3.429245283	-4.811320755	COLE	2	2.1302	NA	2.1302	2.1302	2.1302	3	2.1302	2.1302	NA	2.1302	2.1302	2.1302	5	2.1302	2.1302	2.1302	2.1302	NA	3	2.1302	2.1302	NA	2.1302
36	70036	DRYSDALE	124913	2010	2350	1	2	6	W9A10YANA	2753	32	25	1	2	RFD	1.7653	g/100g	23/10/10 Hurricane	LAST	W9A10YANA_RFD	-19.5	9	-3.429245283	-4.811320755	YANA	2	1.7653	NA	1.7653	1.7653	1.7653	3	1.7653	1.7653	NA	1.7653	1.7653	1.7653	4	1.7653	1.7653	1.7653	NA	1.7653	2	1.7653	NA	1.7653	1.7653
37	70037	WW19663	122455	2010	1495	1	2	7	W9A10YANA	295	4	31	1	2	RFD	2.1507	g/100g	23/10/10 Lucerne	LAST	W9A10YANA_RFD	-13.5	-19	-3.429245283	-4.811320755	YANA	1	NA	2.1507	2.1507	2.1507	2.1507	5	2.1507	2.1507	2.1507	2.1507	NA	2.1507	3	2.1507	2.1507	NA	2.1507	2.1507	2	2.1507	NA	2.1507	2.1507
38	70038	HRZ05_0145	125672	2010	2620	1	2	8	W9A10YANA	3512	40	80	2	4	IRR	2.3224	g/100g	30/10/10 Lucerne	LAST	W9A10YANA_IRR	35.5	17	-3.429245283	-4.811320755	YANA	2	2.3224	NA	2.3224	2.3224	2.3224	2	2.3224	NA	2.3224	2.3224	2.3224	2.3224	1	NA	2.3224	2.3224	2.3224	2.3224	1	NA	2.3224	2.3224	2.3224
39	70039	HRZ06_2082	122466	2010	1499	1	2	9	W9A10YANA	306	4	42	1	2	RFD	2.3314	g/100g	23/10/10 Lucerne	LAST	W9A10YANA_RFD	-2.5	-19	-3.429245283	-4.811320755	YANA	4	2.3314	2.3314	2.3314	NA	2.3314	1	NA	2.3314	2.3314	2.3314	2.3314	2.3314	4	2.3314	2.3314	2.3314	NA	2.3314	4	2.3314	2.3314	2.3314	NA
40	70040	LINCOLN	119253	2010	378	1	2	10	W9A10COLE	1045	14	57	1	2	RFD	1.9778	g/100g	12/10/2010	LAST	W9A10COLE_RFD	18.5	-12.5	-3.429245283	-4.811320755	COLE	3	1.9778	1.9778	NA	1.9778	1.9778	4	1.9778	1.9778	1.9778	NA	1.9778	1.9778	2	1.9778	NA	1.9778	1.9778	1.9778	4	1.9778	1.9778	1.9778	NA
41	70041	WW19660	119107	2010	308	1	2	11	W9A10COLE	899	12	63	1	1	IRR	1.5473	g/100g	12/10/2010	LAST	W9A10COLE_IRR	24.5	-14.5	-3.429245283	-4.811320755	COLE	1	NA	1.5473	1.5473	1.5473	1.5473	2	1.5473	NA	1.5473	1.5473	1.5473	1.5473	1	NA	1.5473	1.5473	1.5473	1.5473	2	1.5473	NA	1.5473	1.5473
42	70042	WW20256	120007	2010	636	1	2	12	W9A10COLE	1799	24	51	1	2	RFD	1.8473	g/100g	12/10/2010	LAST	W9A10COLE_RFD	12.5	-2.5	-3.429245283	-4.811320755	COLE	2	1.8473	NA	1.8473	1.8473	1.8473	5	1.8473	1.8473	1.8473	1.8473	NA	1.8473	2	1.8473	NA	1.8473	1.8473	1.8473	1	NA	1.8473	1.8473	1.8473
43	70043	SUN559A	118452	2010	82	1	2	13	W9A10COLE	244	4	16	1	1	IRR	0.99026	g/100g	23/10/10 Lucerne	LAST	W9A10COLE_IRR	-22.5	-22.5	-3.429245283	-4.811320755	COLE	4	0.99026	0.99026	0.99026	NA	0.99026	1	NA	0.99026	0.99026	0.99026	0.99026	0.99026	4	0.99026	0.99026	0.99026	NA	0.99026	5	0.99026	0.99026	0.99026	0.99026
44	70044	90670_91	125287	2010	2489	1	2	14	W9A10YANA	3127	36	47	2	3	RFD	1.8964	g/100g	30/10/10 Lucerne	LAST	W9A10YANA_RFD	2.5	13	-3.429245283	-4.811320755	YANA	1	NA	1.8964	1.8964	1.8964	1.8964	2	1.8964	NA	1.8964	1.8964	1.8964	1.8964	1	NA	1.8964	1.8964	1.8964	1.8964	1	NA	1.8964	1.8964	1.8964
45	70045	QT13359	121034	2010	999	1	2	15	W9A10COLE	2826	38	14	2	3	RFD	2.2913	g/100g	27/10/10 Lucerne	LAST	W9A10COLE_RFD	-24.5	11.5	-3.429245283	-4.811320755	COLE	1	NA	2.2913	2.2913	2.2913	2.2913	3	2.2913	2.2913	NA	2.2913	2.2913	2.2913	5	2.2913	2.2913	2.2913	2.2913	NA	3	2.2913	2.2913	NA	2.2913
46	70046	WW19662	119904	2010	598	1	2	16	W9A10COLE	1696	23	24	1	2	RFD	2.0348	g/100g	12/10/2010	LAST	W9A10COLE_RFD	-14.5	-3.5	-3.429245283	-4.811320755	COLE	4	2.0348	2.0348	2.0348	NA	2.0348	5	2.0348	2.0348	2.0348	2.0348	NA	2.0348	5	2.0348	2.0348	2.0348	2.0348	NA	1	NA	2.0348	2.0348	2.0348
47	70047	HRZ06_0141	119788	2010	565	1	2	17	W9A10COLE	1580	21	60	1	2	RFD	2.35	g/100g	12/10/2010	LAST	W9A10COLE_RFD	21.5	-5.5	-3.429245283	-4.811320755	COLE	3	2.35	2.35	NA	2.35	2.35	3	2.35	2.35	NA	2.35	2.35	2.35	4	2.35	2.35	2.35	NA	2.35	1	NA	2.35	2.35	2.35
48	70048	8890_213	121286	2010	1073	1	2	18	W9A10COLE	3078	41	38	2	4	IRR	1.5434	g/100g	27/10/10 Lucerne	LAST	W9A10COLE_IRR	-0.5	14.5	-3.429245283	-4.811320755	COLE	3	1.5434	1.5434	NA	1.5434	1.5434	3	1.5434	1.5434	NA	1.5434	1.5434	1.5434	5	1.5434	1.5434	1.5434	1.5434	NA	1	NA	1.5434	1.5434	1.5434
49	70049	WW20096	122304	2010	1443	1	2	19	W9A10YANA	144	2	56	2	3	RFD	2.245	g/100g	30/10/10 Lucerne	LAST	W9A10YANA_RFD	11.5	-21	-3.429245283	-4.811320755	YANA	2	2.245	NA	2.245	2.245	2.245	2	2.245	NA	2.245	2.245	2.245	2.245	1	NA	2.245	2.245	2.245	2.245	1	NA	2.245	2.245	2.245
50	70050	VT1020	120029	2010	643	1	2	20	W9A10COLE	1821	24	73	1	2	RFD	1.3057	g/100g	19/10/2010	LAST	W9A10COLE_RFD	34.5	-2.5	-3.429245283	-4.811320755	COLE	4	1.3057	1.3057	1.3057	NA	1.3057	3	1.3057	1.3057	NA	1.3057	1.3057	1.3057	2	1.3057	NA	1.3057	1.3057	1.3057	5	1.3057	1.3057	1.3057	1.3057
51	70051	SUN559A	120592	2010	817	1	2	21	W9A10COLE	2384	32	28	2	3	RFD	2.1365	g/100g	27/10/10 Lucerne	LAST	W9A10COLE_RFD	-10.5	5.5	-3.429245283	-4.811320755	COLE	4	2.1365	2.1365	2.1365	NA	2.1365	1	NA	2.1365	2.1365	2.1365	2.1365	2.1365	4	2.1365	2.1365	2.1365	NA	2.1365	5	2.1365	2.1365	2.1365	2.1365
52	70052	WW19490	122583	2010	1537	1	2	22	W9A10YANA	423	5	71	2	4	IRR	1.5558	g/100g	30/10/10 Lucerne	LAST	W9A10YANA_IRR	26.5	-18	-3.429245283	-4.811320755	YANA	3	1.5558	1.5558	NA	1.5558	1.5558	5	1.5558	1.5558	1.5558	1.5558	NA	1.5558	5	1.5558	1.5558	1.5558	1.5558	NA	4	1.5558	1.5558	1.5558	NA
53	70053	MCCUBBIN	121368	2010	1098	1	2	23	W9A10COLE	3160	42	44	2	4	IRR	1.552	g/100g	27/10/10 Lucerne	LAST	W9A10COLE_IRR	5.5	15.5	-3.429245283	-4.811320755	COLE	2	1.552	NA	1.552	1.552	1.552	3	1.552	1.552	NA	1.552	1.552	1.552	2	1.552	NA	1.552	1.552	1.552	4	1.552	1.552	1.552	NA
54	70054	HRZ03_0061	118870	2010	210	1	2	24	W9A10COLE	662	9	54	1	1	IRR	1.6421	g/100g	19/10/2010	LAST	W9A10COLE_IRR	15.5	-17.5	-3.429245283	-4.811320755	COLE	5	1.6421	1.6421	1.6421	1.6421	NA	4	1.6421	1.6421	1.6421	NA	1.6421	1.6421	2	1.6421	NA	1.6421	1.6421	1.6421	5	1.6421	1.6421	1.6421	1.6421
55	70055	SUN570D	121061	2010	1013	1	2	25	W9A10COLE	2853	38	41	2	3	RFD	2.0955	g/100g	27/10/10 Lucerne	LAST	W9A10COLE_RFD	2.5	11.5	-3.429245283	-4.811320755	COLE	1	NA	2.0955	2.0955	2.0955	2.0955	5	2.0955	2.0955	2.0955	2.0955	NA	2.0955	5	2.0955	2.0955	2.0955	2.0955	NA	4	2.0955	2.0955	2.0955	NA
56	70056	WW19682	119370	2010	432	1	2	26	W9A10COLE	1162	16	22	1	2	RFD	2.095	g/100g	19/10/2010	LAST	W9A10COLE_RFD	-16.5	-10.5	-3.429245283	-4.811320755	COLE	2	2.095	NA	2.095	2.095	2.095	2	2.095	NA	2.095	2.095	2.095	2.095	4	2.095	2.095	2.095	NA	2.095	4	2.095	2.095	2.095	NA
57	70057	VT1308	122477	2010	1501	1	2	27	W9A10YANA	317	4	53	2	3	RFD	1.6994	g/100g	30/10/10 Lucerne	LAST	W9A10YANA_RFD	8.5	-19	-3.429245283	-4.811320755	YANA	2	1.6994	NA	1.6994	1.6994	1.6994	5	1.6994	1.6994	1.6994	1.6994	NA	1.6994	3	1.6994	1.6994	NA	1.6994	1.6994	3	1.6994	1.6994	NA	1.6994
58	70058	HRZ06_0055	123983	2010	2036	1	2	28	W9A10YANA	1823	21	63	2	3	RFD	1.9328	g/100g	30/10/10 Lucerne	LAST	W9A10YANA_RFD	18.5	-2	-3.429245283	-4.811320755	YANA	2	1.9328	NA	1.9328	1.9328	1.9328	1	NA	1.9328	1.9328	1.9328	1.9328	1.9328	4	1.9328	1.9328	1.9328	NA	1.9328	4	1.9328	1.9328	1.9328	NA
59	70059	WW19473	119727	2010	541	1	2	29	W9A10COLE	1519	20	75	1	2	RFD	1.782	g/100g	19/10/2010	LAST	W9A10COLE_RFD	36.5	-6.5	-3.429245283	-4.811320755	COLE	4	1.782	1.782	1.782	NA	1.782	4	1.782	1.782	1.782	NA	1.782	1.782	1	NA	1.782	1.782	1.782	1.782	5	1.782	1.782	1.782	1.782
60	70060	HRZ04_0191	126009	2010	2742	1	2	30	W9A10YANA	3849	44	65	2	3	RFD	1.4514	g/100g	30/10/10 Lucerne	LAST	W9A10YANA_RFD	20.5	21	-3.429245283	-4.811320755	YANA	5	1.4514	1.4514	1.4514	1.4514	NA	4	1.4514	1.4514	1.4514	NA	1.4514	1.4514	1	NA	1.4514	1.4514	1.4514	1.4514	3	1.4514	1.4514	NA	1.4514
61	70061	SUNBRI	120881	2010	919	1	3	1	W9A10COLE	2673	36	13	2	3	RFD	1.77	g/100g	27/10/10 Lucerne	LAST	W9A10COLE_RFD	-25.5	9.5	-2.429245283	-4.811320755	COLE	1	NA	1.77	1.77	1.77	1.77	5	1.77	1.77	1.77	1.77	NA	1.77	1	NA	1.77	1.77	1.77	1.77	1	NA	1.77	1.77	1.77
62	70062	WW16367	125252	2010	2473	1	3	2	W9A10YANA	3092	36	12	1	1	IRR	1.81	g/100g	23/10/10 Lucerne	LAST	W9A10YANA_IRR	-32.5	13	-2.429245283	-4.811320755	YANA	4	1.81	1.81	1.81	NA	1.81	4	1.81	1.81	1.81	NA	1.81	1.81	2	1.81	NA	1.81	1.81	1.81	3	1.81	1.81	NA	1.81
63	70063	GILES	119145	2010	326	1	3	3	W9A10COLE	937	13	25	1	1	IRR	1.5486	g/100g	19/10/2010	LAST	W9A10COLE_IRR	-13.5	-13.5	-2.429245283	-4.811320755	COLE	2	1.5486	NA	1.5486	1.5486	1.5486	1	NA	1.5486	1.5486	1.5486	1.5486	1.5486	5	1.5486	1.5486	1.5486	1.5486	NA	3	1.5486	1.5486	NA	1.5486
64	70064	QT13626	120629	2010	830	1	3	4	W9A10COLE	2421	32	65	2	3	RFD	2.2031	g/100g	27/10/10 Lucerne	LAST	W9A10COLE_RFD	26.5	5.5	-2.429245283	-4.811320755	COLE	1	NA	2.2031	2.2031	2.2031	2.2031	1	NA	2.2031	2.2031	2.2031	2.2031	2.2031	2	2.2031	NA	2.2031	2.2031	2.2031	3	2.2031	2.2031	NA	2.2031
65	70065	VW0779	123620	2010	1909	1	3	5	W9A10YANA	1460	17	52	2	3	RFD	2.4895	g/100g	30/10/10 Hurricane	LAST	W9A10YANA_RFD	7.5	-6	-2.429245283	-4.811320755	YANA	1	NA	2.4895	2.4895	2.4895	2.4895	5	2.4895	2.4895	2.4895	2.4895	NA	2.4895	3	2.4895	2.4895	NA	2.4895	2.4895	4	2.4895	2.4895	2.4895	NA
66	70066	WW18957	118901	2010	223	1	3	6	W9A10COLE	693	10	9	1	1	IRR	2.1101	g/100g	19/10/2010	LAST	W9A10COLE_IRR	-29.5	-16.5	-2.429245283	-4.811320755	COLE	5	2.1101	2.1101	2.1101	2.1101	NA	4	2.1101	2.1101	2.1101	NA	2.1101	2.1101	5	2.1101	2.1101	2.1101	2.1101	NA	5	2.1101	2.1101	2.1101	2.1101
67	70067	WW16259	118636	2010	142	1	3	7	W9A10COLE	428	6	48	1	1	IRR	1.3933	g/100g	19/10/2010	LAST	W9A10COLE_IRR	9.5	-20.5	-2.429245283	-4.811320755	COLE	2	1.3933	NA	1.3933	1.3933	1.3933	5	1.3933	1.3933	1.3933	1.3933	NA	1.3933	5	1.3933	1.3933	1.3933	1.3933	NA	4	1.3933	1.3933	1.3933	NA
68	70068	WW17062	121309	2010	1079	1	3	8	W9A10COLE	3101	41	61	2	4	IRR	1.6523	g/100g	27/10/10 Lucerne	LAST	W9A10COLE_IRR	22.5	14.5	-2.429245283	-4.811320755	COLE	1	NA	1.6523	1.6523	1.6523	1.6523	1	NA	1.6523	1.6523	1.6523	1.6523	1.6523	5	1.6523	1.6523	1.6523	1.6523	NA	3	1.6523	1.6523	NA	1.6523
69	70069	VW0373	121922	2010	1300	1	3	9	W9A10COLE	3714	49	66	2	4	IRR	2.299	g/100g	27/10/10 Lucerne	LAST	W9A10COLE_IRR	27.5	22.5	-2.429245283	-4.811320755	COLE	4	2.299	2.299	2.299	NA	2.299	1	NA	2.299	2.299	2.299	2.299	2.299	2	2.299	NA	2.299	2.299	2.299	2	2.299	NA	2.299	2.299
70	70070	HRZ06_0514	122037	2010	1343	1	3	10	W9A10COLE	3829	51	29	2	4	IRR	2.0082	g/100g	27/10/10 Lucerne	LAST	W9A10COLE_IRR	-9.5	24.5	-2.429245283	-4.811320755	COLE	3	2.0082	2.0082	NA	2.0082	2.0082	5	2.0082	2.0082	2.0082	2.0082	NA	2.0082	4	2.0082	2.0082	2.0082	NA	2.0082	4	2.0082	2.0082	2.0082	NA
71	70071	VU2828_1	119022	2010	266	1	3	11	W9A10COLE	814	11	54	1	1	IRR	0.98902	g/100g	19/10/2010	LAST	W9A10COLE_IRR	15.5	-15.5	-2.429245283	-4.811320755	COLE	5	0.98902	0.98902	0.98902	0.98902	NA	4	0.98902	0.98902	0.98902	NA	0.98902	0.98902	1	NA	0.98902	0.98902	0.98902	0.98902	3	0.98902	0.98902	NA	0.98902
72	70072	HRZ04_0188	123583	2010	1898	1	3	12	W9A10YANA	1423	17	15	1	1	IRR	1.6957	g/100g	23/10/10 Hurricane	LAST	W9A10YANA_IRR	-29.5	-6	-2.429245283	-4.811320755	YANA	5	1.6957	1.6957	1.6957	1.6957	NA	2	1.6957	NA	1.6957	1.6957	1.6957	1.6957	2	1.6957	NA	1.6957	1.6957	1.6957	3	1.6957	1.6957	NA	1.6957
73	70073	VW2843	120116	2010	677	1	3	13	W9A10COLE	1908	26	8	1	2	RFD	1.166	g/100g	19/10/2010	LAST	W9A10COLE_RFD	-30.5	-0.5	-2.429245283	-4.811320755	COLE	4	1.166	1.166	1.166	NA	1.166	5	1.166	1.166	1.166	1.166	NA	1.166	4	1.166	1.166	1.166	NA	1.166	5	1.166	1.166	1.166	1.166
74	70074	WW20484	119069	2010	285	1	3	14	W9A10COLE	861	12	25	1	1	IRR	1.4328	g/100g	19/10/2010	LAST	W9A10COLE_IRR	-13.5	-14.5	-2.429245283	-4.811320755	COLE	4	1.4328	1.4328	1.4328	NA	1.4328	5	1.4328	1.4328	1.4328	1.4328	NA	1.4328	3	1.4328	1.4328	NA	1.4328	1.4328	1	NA	1.4328	1.4328	1.4328
75	70075	HRZ06_2087	119177	2010	341	1	3	15	W9A10COLE	969	13	57	1	1	IRR	1.8844	g/100g	12/10/2010	LAST	W9A10COLE_IRR	18.5	-13.5	-2.429245283	-4.811320755	COLE	2	1.8844	NA	1.8844	1.8844	1.8844	3	1.8844	1.8844	NA	1.8844	1.8844	1.8844	2	1.8844	NA	1.8844	1.8844	1.8844	5	1.8844	1.8844	1.8844	1.8844
76	70076	HRZ06_0145	122595	2010	1542	1	3	16	W9A10YANA	435	5	83	2	4	IRR	2.2665	g/100g	30/10/10 Hurricane	LAST	W9A10YANA_IRR	38.5	-18	-2.429245283	-4.811320755	YANA	3	2.2665	2.2665	NA	2.2665	2.2665	3	2.2665	2.2665	NA	2.2665	2.2665	2.2665	2	2.2665	NA	2.2665	2.2665	2.2665	5	2.2665	2.2665	2.2665	2.2665
77	70077	VW3195	123856	2010	1989	1	3	17	W9A10YANA	1696	20	24	1	2	RFD	2.3353	g/100g	23/10/10 Hurricane	LAST	W9A10YANA_RFD	-20.5	-3	-2.429245283	-4.811320755	YANA	2	2.3353	NA	2.3353	2.3353	2.3353	5	2.3353	2.3353	2.3353	2.3353	NA	2.3353	1	NA	2.3353	2.3353	2.3353	2.3353	5	2.3353	2.3353	2.3353	2.3353
78	70078	WW14396	123153	2010	1744	1	3	18	W9A10YANA	993	12	25	1	2	RFD	2.305	g/100g	23/10/10 Hurricane	LAST	W9A10YANA_RFD	-19.5	-11	-2.429245283	-4.811320755	YANA	5	2.305	2.305	2.305	2.305	NA	5	2.305	2.305	2.305	2.305	NA	2.305	2	2.305	NA	2.305	2.305	2.305	2	2.305	NA	2.305	2.305
79	70079	QT13359	123093	2010	1722	1	3	19	W9A10YANA	933	11	53	2	3	RFD	2.0603	g/100g	30/10/10 Lucerne	LAST	W9A10YANA_RFD	8.5	-12	-2.429245283	-4.811320755	YANA	1	NA	2.0603	2.0603	2.0603	2.0603	3	2.0603	2.0603	NA	2.0603	2.0603	2.0603	5	2.0603	2.0603	2.0603	2.0603	NA	3	2.0603	2.0603	NA	2.0603
80	70080	VW2324	121538	2010	1171	1	3	20	W9A10COLE	3330	44	62	2	4	IRR	1.3602	g/100g	27/10/10 Lucerne	LAST	W9A10COLE_IRR	23.5	17.5	-2.429245283	-4.811320755	COLE	4	1.3602	1.3602	1.3602	NA	1.3602	3	1.3602	1.3602	NA	1.3602	1.3602	1.3602	5	1.3602	1.3602	1.3602	1.3602	NA	1	NA	1.3602	1.3602	1.3602
81	70081	WW16917	123513	2010	1873	1	3	21	W9A10YANA	1353	16	33	1	2	RFD	2.1947	g/100g	23/10/10 Lucerne	LAST	W9A10YANA_RFD	-11.5	-7	-2.429245283	-4.811320755	YANA	5	2.1947	2.1947	2.1947	2.1947	NA	3	2.1947	2.1947	NA	2.1947	2.1947	2.1947	3	2.1947	2.1947	NA	2.1947	2.1947	2	2.1947	NA	2.1947	2.1947
82	70082	YENDA	123488	2010	1861	1	3	22	W9A10YANA	1328	16	8	1	1	IRR	1.1887	g/100g	23/10/10 Lucerne	LAST	W9A10YANA_IRR	-36.5	-7	-2.429245283	-4.811320755	YANA	5	1.1887	1.1887	1.1887	1.1887	NA	4	1.1887	1.1887	1.1887	NA	1.1887	1.1887	2	1.1887	NA	1.1887	1.1887	1.1887	1	NA	1.1887	1.1887	1.1887
83	70083	RAC1429	118798	2010	191	1	3	23	W9A10COLE	590	8	58	1	1	IRR	1.8296	g/100g	19/10/2010	LAST	W9A10COLE_IRR	19.5	-18.5	-2.429245283	-4.811320755	COLE	5	1.8296	1.8296	1.8296	1.8296	NA	2	1.8296	NA	1.8296	1.8296	1.8296	1.8296	3	1.8296	1.8296	NA	1.8296	1.8296	4	1.8296	1.8296	1.8296	NA
84	70084	WW19746	124951	2010	2365	1	3	24	W9A10YANA	2791	32	63	2	3	RFD	1.8599	g/100g	30/10/10 Lucerne	LAST	W9A10YANA_RFD	18.5	9	-2.429245283	-4.811320755	YANA	4	1.8599	1.8599	1.8599	NA	1.8599	4	1.8599	1.8599	1.8599	NA	1.8599	1.8599	4	1.8599	1.8599	1.8599	NA	1.8599	2	1.8599	NA	1.8599	1.8599
85	70085	VW2410	124645	2010	2264	1	3	25	W9A10YANA	2485	29	21	1	1	IRR	1.599	g/100g	23/10/10 Lucerne	LAST	W9A10YANA_IRR	-23.5	6	-2.429245283	-4.811320755	YANA	4	1.599	1.599	1.599	NA	1.599	5	1.599	1.599	1.599	1.599	NA	1.599	2	1.599	NA	1.599	1.599	1.599	3	1.599	1.599	NA	1.599
86	70086	VW1152	120947	2010	958	1	3	26	W9A10COLE	2739	37	3	2	3	RFD	1.8481	g/100g	27/10/10 Lucerne	LAST	W9A10COLE_RFD	-35.5	10.5	-2.429245283	-4.811320755	COLE	1	NA	1.8481	1.8481	1.8481	1.8481	4	1.8481	1.8481	1.8481	NA	1.8481	1.8481	2	1.8481	NA	1.8481	1.8481	1.8481	5	1.8481	1.8481	1.8481	1.8481
87	70087	WW19864	121481	2010	1154	1	3	27	W9A10COLE	3273	44	5	2	4	IRR	1.775	g/100g	27/10/10 Lucerne	LAST	W9A10COLE_IRR	-33.5	17.5	-2.429245283	-4.811320755	COLE	2	1.775	NA	1.775	1.775	1.775	2	1.775	NA	1.775	1.775	1.775	1.775	1	NA	1.775	1.775	1.775	1.775	5	1.775	1.775	1.775	1.775
88	70088	WW19561	120586	2010	815	1	3	28	W9A10COLE	2378	32	22	2	3	RFD	2.4391	g/100g	27/10/10 Lucerne	LAST	W9A10COLE_RFD	-16.5	5.5	-2.429245283	-4.811320755	COLE	5	2.4391	2.4391	2.4391	2.4391	NA	2	2.4391	NA	2.4391	2.4391	2.4391	2.4391	2	2.4391	NA	2.4391	2.4391	2.4391	4	2.4391	2.4391	2.4391	NA
89	70089	VW0644	123898	2010	2005	1	3	29	W9A10YANA	1738	20	66	2	3	RFD	1.7086	g/100g	30/10/10 Lucerne	LAST	W9A10YANA_RFD	21.5	-3	-2.429245283	-4.811320755	YANA	5	1.7086	1.7086	1.7086	1.7086	NA	1	NA	1.7086	1.7086	1.7086	1.7086	1.7086	3	1.7086	1.7086	NA	1.7086	1.7086	4	1.7086	1.7086	1.7086	NA
90	70090	VW0857	120918	2010	937	1	3	30	W9A10COLE	2710	36	50	2	3	RFD	1.8346	g/100g	27/10/10 Lucerne	LAST	W9A10COLE_RFD	11.5	9.5	-2.429245283	-4.811320755	COLE	5	1.8346	1.8346	1.8346	1.8346	NA	2	1.8346	NA	1.8346	1.8346	1.8346	1.8346	4	1.8346	1.8346	1.8346	NA	1.8346	4	1.8346	1.8346	1.8346	NA
91	70091	HRZ04_0206	123807	2010	1971	1	4	1	W9A10YANA	1647	19	63	2	3	RFD	2.0283	g/100g	30/10/10 Lucerne	LAST	W9A10YANA_RFD	18.5	-4	-1.429245283	-4.811320755	YANA	1	NA	2.0283	2.0283	2.0283	2.0283	1	NA	2.0283	2.0283	2.0283	2.0283	2.0283	4	2.0283	2.0283	2.0283	NA	2.0283	4	2.0283	2.0283	2.0283	NA
92	70092	VW0373	119706	2010	533	1	4	2	W9A10COLE	1498	20	54	1	2	RFD	1.3701	g/100g	19/10/2010	LAST	W9A10COLE_RFD	15.5	-6.5	-1.429245283	-4.811320755	COLE	4	1.3701	1.3701	1.3701	NA	1.3701	1	NA	1.3701	1.3701	1.3701	1.3701	1.3701	2	1.3701	NA	1.3701	1.3701	1.3701	2	1.3701	NA	1.3701	1.3701
93	70093	SUN571B	121005	2010	987	1	4	3	W9A10COLE	2797	37	61	2	3	RFD	1.6475	g/100g	27/10/10 Lucerne	LAST	W9A10COLE_RFD	22.5	10.5	-1.429245283	-4.811320755	COLE	5	1.6475	1.6475	1.6475	1.6475	NA	3	1.6475	1.6475	NA	1.6475	1.6475	1.6475	5	1.6475	1.6475	1.6475	1.6475	NA	3	1.6475	1.6475	NA	1.6475
94	70094	BARHAM	125304	2010	2494	1	4	4	W9A10YANA	3144	36	64	2	3	RFD	1.8906	g/100g	30/10/10 Lucerne	LAST	W9A10YANA_RFD	19.5	13	-1.429245283	-4.811320755	YANA	2	1.8906	NA	1.8906	1.8906	1.8906	4	1.8906	1.8906	1.8906	NA	1.8906	1.8906	4	1.8906	1.8906	1.8906	NA	1.8906	5	1.8906	1.8906	1.8906	1.8906
95	70095	WW19826	125214	2010	2457	1	4	5	W9A10YANA	3054	35	62	2	3	RFD	1.9853	g/100g	30/10/10 Lucerne	LAST	W9A10YANA_RFD	17.5	12	-1.429245283	-4.811320755	YANA	1	NA	1.9853	1.9853	1.9853	1.9853	5	1.9853	1.9853	1.9853	1.9853	NA	1.9853	4	1.9853	1.9853	1.9853	NA	1.9853	5	1.9853	1.9853	1.9853	1.9853
96	70096	VW0394	120226	2010	708	1	4	6	W9A10COLE	2018	27	42	2	3	RFD	2.3428	g/100g	27/10/10 Lucerne	LAST	W9A10COLE_RFD	3.5	0.5	-1.429245283	-4.811320755	COLE	2	2.3428	NA	2.3428	2.3428	2.3428	1	NA	2.3428	2.3428	2.3428	2.3428	2.3428	5	2.3428	2.3428	2.3428	2.3428	NA	2	2.3428	NA	2.3428	2.3428
97	70097	HRZ06_0043	122268	2010	1430	1	4	7	W9A10YANA	108	2	20	1	1	IRR	1.6812	g/100g	23/10/10 Lucerne	LAST	W9A10YANA_IRR	-24.5	-21	-1.429245283	-4.811320755	YANA	5	1.6812	1.6812	1.6812	1.6812	NA	3	1.6812	1.6812	NA	1.6812	1.6812	1.6812	1	NA	1.6812	1.6812	1.6812	1.6812	1	NA	1.6812	1.6812	1.6812
98	70098	7896_254	121177	2010	1044	1	4	8	W9A10COLE	2969	40	5	2	4	IRR	2.2813	g/100g	27/10/10 Lucerne	LAST	W9A10COLE_IRR	-33.5	13.5	-1.429245283	-4.811320755	COLE	3	2.2813	2.2813	NA	2.2813	2.2813	2	2.2813	NA	2.2813	2.2813	2.2813	2.2813	5	2.2813	2.2813	2.2813	2.2813	NA	4	2.2813	2.2813	2.2813	NA
99	70099	WW19891	124106	2010	2083	1	4	9	W9A10YANA	1946	23	10	1	1	IRR	1.8954	g/100g	23/10/10 Lucerne	LAST	W9A10YANA_IRR	-34.5	0	-1.429245283	-4.811320755	YANA	1	NA	1.8954	1.8954	1.8954	1.8954	4	1.8954	1.8954	1.8954	NA	1.8954	1.8954	1	NA	1.8954	1.8954	1.8954	1.8954	3	1.8954	1.8954	NA	1.8954
100	70100	PAVON_DWARF	118753	2010	173	1	4	10	W9A10COLE	545	8	13	1	1	IRR	1.8517	g/100g	12/10/2010	LAST	W9A10COLE_IRR	-25.5	-18.5	-1.429245283	-4.811320755	COLE	3	1.8517	1.8517	NA	1.8517	1.8517	2	1.8517	NA	1.8517	1.8517	1.8517	1.8517	1	NA	1.8517	1.8517	1.8517	1.8517	5	1.8517	1.8517	1.8517	1.8517
101	70101	HRZ06_0323	119963	2010	623	1	4	11	W9A10COLE	1755	24	7	1	2	RFD	1.9716	g/100g	23/10/10 Lucerne	LAST	W9A10COLE_RFD	-31.5	-2.5	-1.429245283	-4.811320755	COLE	3	1.9716	1.9716	NA	1.9716	1.9716	2	1.9716	NA	1.9716	1.9716	1.9716	1.9716	3	1.9716	1.9716	NA	1.9716	1.9716	1	NA	1.9716	1.9716	1.9716
102	70102	HRZ04_0161	125341	2010	2508	1	4	12	W9A10YANA	3181	37	13	1	1	IRR	2.0424	g/100g	23/10/10 Lucerne	LAST	W9A10YANA_IRR	-31.5	14	-1.429245283	-4.811320755	YANA	4	2.0424	2.0424	2.0424	NA	2.0424	2	2.0424	NA	2.0424	2.0424	2.0424	2.0424	1	NA	2.0424	2.0424	2.0424	2.0424	3	2.0424	2.0424	NA	2.0424
103	70103	WW18830	119256	2010	379	1	4	13	W9A10COLE	1048	14	60	1	2	RFD	1.402	g/100g	19/10/2010	LAST	W9A10COLE_RFD	21.5	-12.5	-1.429245283	-4.811320755	COLE	5	1.402	1.402	1.402	1.402	NA	2	1.402	NA	1.402	1.402	1.402	1.402	4	1.402	1.402	1.402	NA	1.402	5	1.402	1.402	1.402	1.402
104	70104	VW3789	124831	2010	2326	1	4	14	W9A10YANA	2671	31	31	1	2	RFD	2.4211	g/100g	23/10/10 Hurricane	LAST	W9A10YANA_RFD	-13.5	8	-1.429245283	-4.811320755	YANA	1	NA	2.4211	2.4211	2.4211	2.4211	3	2.4211	2.4211	NA	2.4211	2.4211	2.4211	4	2.4211	2.4211	2.4211	NA	2.4211	2	2.4211	NA	2.4211	2.4211
105	70105	WW19513	124156	2010	2099	1	4	15	W9A10YANA	1996	23	60	2	3	RFD	1.4949	g/100g	30/10/10 Lucerne	LAST	W9A10YANA_RFD	15.5	0	-1.429245283	-4.811320755	YANA	3	1.4949	1.4949	NA	1.4949	1.4949	1	NA	1.4949	1.4949	1.4949	1.4949	1.4949	2	1.4949	NA	1.4949	1.4949	1.4949	4	1.4949	1.4949	1.4949	NA
106	70106	VW1174	122255	2010	1424	1	4	16	W9A10YANA	95	2	7	1	1	IRR	2.1976	g/100g	23/10/10 Lucerne	LAST	W9A10YANA_IRR	-37.5	-21	-1.429245283	-4.811320755	YANA	3	2.1976	2.1976	NA	2.1976	2.1976	4	2.1976	2.1976	2.1976	NA	2.1976	2.1976	1	NA	2.1976	2.1976	2.1976	2.1976	5	2.1976	2.1976	2.1976	2.1976
107	70107	EGA_GREGORY	123763	2010	1958	1	4	17	W9A10YANA	1603	19	19	1	1	IRR	1.2689	g/100g	23/10/10 Lucerne	LAST	W9A10YANA_IRR	-25.5	-4	-1.429245283	-4.811320755	YANA	2	1.2689	NA	1.2689	1.2689	1.2689	4	1.2689	1.2689	1.2689	NA	1.2689	1.2689	5	1.2689	1.2689	1.2689	1.2689	NA	4	1.2689	1.2689	1.2689	NA
108	70108	VW0857	121185	2010	1045	1	4	18	W9A10COLE	2977	40	13	2	4	IRR	1.3374	g/100g	27/10/10 Lucerne	LAST	W9A10COLE_IRR	-25.5	13.5	-1.429245283	-4.811320755	COLE	5	1.3374	1.3374	1.3374	1.3374	NA	2	1.3374	NA	1.3374	1.3374	1.3374	1.3374	4	1.3374	1.3374	1.3374	NA	1.3374	4	1.3374	1.3374	1.3374	NA
109	70109	HRZ05_0101	123353	2010	1813	1	4	19	W9A10YANA	1193	14	49	2	3	RFD	2.0695	g/100g	30/10/10 Hurricane	LAST	W9A10YANA_RFD	4.5	-9	-1.429245283	-4.811320755	YANA	3	2.0695	2.0695	NA	2.0695	2.0695	5	2.0695	2.0695	2.0695	2.0695	NA	2.0695	3	2.0695	2.0695	NA	2.0695	2.0695	2	2.0695	NA	2.0695	2.0695
110	70110	WW19492	122335	2010	1453	1	4	20	W9A10YANA	175	2	87	2	4	IRR	1.6463	g/100g	30/10/10 Hurricane	LAST	W9A10YANA_IRR	42.5	-21	-1.429245283	-4.811320755	YANA	2	1.6463	NA	1.6463	1.6463	1.6463	1	NA	1.6463	1.6463	1.6463	1.6463	1.6463	5	1.6463	1.6463	1.6463	1.6463	NA	3	1.6463	1.6463	NA	1.6463
111	70111	CRUSADER	119267	2010	387	1	4	21	W9A10COLE	1059	14	71	1	2	RFD	1.6892	g/100g	12/10/2010	LAST	W9A10COLE_RFD	32.5	-12.5	-1.429245283	-4.811320755	COLE	2	1.6892	NA	1.6892	1.6892	1.6892	1	NA	1.6892	1.6892	1.6892	1.6892	1.6892	4	1.6892	1.6892	1.6892	NA	1.6892	2	1.6892	NA	1.6892	1.6892
112	70112	WW19864	124585	2010	2242	1	4	22	W9A10YANA	2425	28	49	2	3	RFD	1.9573	g/100g	30/10/10 Lucerne	LAST	W9A10YANA_RFD	4.5	5	-1.429245283	-4.811320755	YANA	2	1.9573	NA	1.9573	1.9573	1.9573	2	1.9573	NA	1.9573	1.9573	1.9573	1.9573	1	NA	1.9573	1.9573	1.9573	1.9573	5	1.9573	1.9573	1.9573	1.9573
113	70113	WW18946	123001	2010	1693	1	4	23	W9A10YANA	841	10	49	2	3	RFD	1.7827	g/100g	30/10/10 Lucerne	LAST	W9A10YANA_RFD	4.5	-13	-1.429245283	-4.811320755	YANA	5	1.7827	1.7827	1.7827	1.7827	NA	3	1.7827	1.7827	NA	1.7827	1.7827	1.7827	5	1.7827	1.7827	1.7827	1.7827	NA	3	1.7827	1.7827	NA	1.7827
114	70114	WW13602	119994	2010	634	1	4	24	W9A10COLE	1786	24	38	1	2	RFD	2.7134	g/100g	19/10/2010	LAST	W9A10COLE_RFD	-0.5	-2.5	-1.429245283	-4.811320755	COLE	4	2.7134	2.7134	2.7134	NA	2.7134	2	2.7134	NA	2.7134	2.7134	2.7134	2.7134	1	NA	2.7134	2.7134	2.7134	2.7134	1	NA	2.7134	2.7134	2.7134
115	70115	VW0379	123290	2010	1794	1	4	25	W9A10YANA	1130	13	74	2	4	IRR	1.9729	g/100g	30/10/10 Hurricane	LAST	W9A10YANA_IRR	29.5	-10	-1.429245283	-4.811320755	YANA	1	NA	1.9729	1.9729	1.9729	1.9729	1	NA	1.9729	1.9729	1.9729	1.9729	1.9729	3	1.9729	1.9729	NA	1.9729	1.9729	5	1.9729	1.9729	1.9729	1.9729
116	70116	WW20140	123937	2010	2018	1	4	26	W9A10YANA	1777	21	17	1	1	IRR	2.2958	g/100g	23/10/10 Lucerne	LAST	W9A10YANA_IRR	-27.5	-2	-1.429245283	-4.811320755	YANA	3	2.2958	2.2958	NA	2.2958	2.2958	4	2.2958	2.2958	2.2958	NA	2.2958	2.2958	4	2.2958	2.2958	2.2958	NA	2.2958	5	2.2958	2.2958	2.2958	2.2958
117	70117	WAWHT2793	123157	2010	1746	1	4	27	W9A10YANA	997	12	29	1	2	RFD	1.8599	g/100g	23/10/10 Hurricane	LAST	W9A10YANA_RFD	-15.5	-11	-1.429245283	-4.811320755	YANA	3	1.8599	1.8599	NA	1.8599	1.8599	4	1.8599	1.8599	1.8599	NA	1.8599	1.8599	3	1.8599	1.8599	NA	1.8599	1.8599	2	1.8599	NA	1.8599	1.8599
118	70118	B1272T	118985	2010	254	1	4	28	W9A10COLE	777	11	17	1	1	IRR	2.1585	g/100g	19/10/2010	LAST	W9A10COLE_IRR	-21.5	-15.5	-1.429245283	-4.811320755	COLE	4	2.1585	2.1585	2.1585	NA	2.1585	5	2.1585	2.1585	2.1585	2.1585	NA	2.1585	1	NA	2.1585	2.1585	2.1585	2.1585	1	NA	2.1585	2.1585	2.1585
119	70120	SENTINEL	121344	2010	1085	1	4	30	W9A10COLE	3136	42	20	2	4	IRR	1.5263	g/100g	27/10/10 Lucerne	LAST	W9A10COLE_IRR	-18.5	15.5	-1.429245283	-4.811320755	COLE	3	1.5263	1.5263	NA	1.5263	1.5263	4	1.5263	1.5263	1.5263	NA	1.5263	1.5263	2	1.5263	NA	1.5263	1.5263	1.5263	3	1.5263	1.5263	NA	1.5263
120	70121	WW19753	119808	2010	571	1	5	1	W9A10COLE	1600	22	4	1	2	RFD	1.9344	g/100g	12/10/2010	LAST	W9A10COLE_RFD	-34.5	-4.5	-0.429245283	-4.811320755	COLE	4	1.9344	1.9344	1.9344	NA	1.9344	5	1.9344	1.9344	1.9344	1.9344	NA	1.9344	1	NA	1.9344	1.9344	1.9344	1.9344	1	NA	1.9344	1.9344	1.9344
121	70122	HRZ04_0420	123697	2010	1938	1	5	2	W9A10YANA	1537	18	41	1	2	RFD	2.5599	g/100g	23/10/10 Hurricane	LAST	W9A10YANA_RFD	-3.5	-5	-0.429245283	-4.811320755	YANA	2	2.5599	NA	2.5599	2.5599	2.5599	1	NA	2.5599	2.5599	2.5599	2.5599	2.5599	2	2.5599	NA	2.5599	2.5599	2.5599	5	2.5599	2.5599	2.5599	2.5599
122	70123	RAC1442	119912	2010	602	1	5	3	W9A10COLE	1704	23	32	1	2	RFD	1.0492	g/100g	19/10/2010	LAST	W9A10COLE_RFD	-6.5	-3.5	-0.429245283	-4.811320755	COLE	5	1.0492	1.0492	1.0492	1.0492	NA	5	1.0492	1.0492	1.0492	1.0492	NA	1.0492	1	NA	1.0492	1.0492	1.0492	1.0492	4	1.0492	1.0492	1.0492	NA
123	70124	95757_7	126008	2010	2741	1	5	4	W9A10YANA	3848	44	64	2	3	RFD	2.3647	g/100g	30/10/10 Lucerne	LAST	W9A10YANA_RFD	19.5	21	-0.429245283	-4.811320755	YANA	2	2.3647	NA	2.3647	2.3647	2.3647	1	NA	2.3647	2.3647	2.3647	2.3647	2.3647	5	2.3647	2.3647	2.3647	2.3647	NA	4	2.3647	2.3647	2.3647	NA
124	70125	VW0404	123852	2010	1986	1	5	5	W9A10YANA	1692	20	20	1	1	IRR	0.97384	g/100g	23/10/10 Lucerne	LAST	W9A10YANA_IRR	-24.5	-3	-0.429245283	-4.811320755	YANA	4	0.97384	0.97384	0.97384	NA	0.97384	4	0.97384	0.97384	0.97384	NA	0.97384	0.97384	3	0.97384	0.97384	NA	0.97384	0.97384	1	NA	0.97384	0.97384	0.97384
125	70126	WW21162	118584	2010	125	1	5	6	W9A10COLE	376	5	72	1	1	IRR	0.51996	g/100g	19/10/2010	LAST	W9A10COLE_IRR	33.5	-21.5	-0.429245283	-4.811320755	COLE	4	0.51996	0.51996	0.51996	NA	0.51996	1	NA	0.51996	0.51996	0.51996	0.51996	0.51996	3	0.51996	0.51996	NA	0.51996	0.51996	2	0.51996	NA	0.51996	0.51996
126	70127	HRZ04_0531	126055	2010	2755	1	5	7	W9A10YANA	3895	45	23	1	2	RFD	2.3063	g/100g	23/10/10 Hurricane	LAST	W9A10YANA_RFD	-21.5	22	-0.429245283	-4.811320755	YANA	5	2.3063	2.3063	2.3063	2.3063	NA	4	2.3063	2.3063	2.3063	NA	2.3063	2.3063	5	2.3063	2.3063	2.3063	2.3063	NA	3	2.3063	2.3063	NA	2.3063
127	70128	SUPER_SERI_1	124709	2010	2280	1	5	8	W9A10YANA	2549	29	85	2	4	IRR	2.2326	g/100g	30/10/10 Hurricane	LAST	W9A10YANA_IRR	40.5	6	-0.429245283	-4.811320755	YANA	1	NA	2.2326	2.2326	2.2326	2.2326	3	2.2326	2.2326	NA	2.2326	2.2326	2.2326	5	2.2326	2.2326	2.2326	2.2326	NA	1	NA	2.2326	2.2326	2.2326
128	70129	WW16452	123232	2010	1779	1	5	9	W9A10YANA	1072	13	16	1	1	IRR	2.1498	g/100g	23/10/10 Lucerne	LAST	W9A10YANA_IRR	-28.5	-10	-0.429245283	-4.811320755	YANA	2	2.1498	NA	2.1498	2.1498	2.1498	1	NA	2.1498	2.1498	2.1498	2.1498	2.1498	4	2.1498	2.1498	2.1498	NA	2.1498	4	2.1498	2.1498	2.1498	NA
129	70130	WW14396	122524	2010	1519	1	5	10	W9A10YANA	364	5	12	1	1	IRR	1.9808	g/100g	23/10/10 Lucerne	LAST	W9A10YANA_IRR	-32.5	-18	-0.429245283	-4.811320755	YANA	5	1.9808	1.9808	1.9808	1.9808	NA	5	1.9808	1.9808	1.9808	1.9808	NA	1.9808	2	1.9808	NA	1.9808	1.9808	1.9808	2	1.9808	NA	1.9808	1.9808
130	70131	HRZ06_0053	119330	2010	416	1	5	11	W9A10COLE	1122	15	58	1	2	RFD	1.1365	g/100g	12/10/2010	LAST	W9A10COLE_RFD	19.5	-11.5	-0.429245283	-4.811320755	COLE	4	1.1365	1.1365	1.1365	NA	1.1365	3	1.1365	1.1365	NA	1.1365	1.1365	1.1365	4	1.1365	1.1365	1.1365	NA	1.1365	4	1.1365	1.1365	1.1365	NA
131	70132	WW16917	120241	2010	712	1	5	12	W9A10COLE	2033	27	57	2	3	RFD	1.8491	g/100g	27/10/10 Lucerne	LAST	W9A10COLE_RFD	18.5	0.5	-0.429245283	-4.811320755	COLE	5	1.8491	1.8491	1.8491	1.8491	NA	3	1.8491	1.8491	NA	1.8491	1.8491	1.8491	3	1.8491	1.8491	NA	1.8491	1.8491	2	1.8491	NA	1.8491	1.8491
132	70133	H45	119249	2010	376	1	5	13	W9A10COLE	1041	14	53	1	2	RFD	1.8948	g/100g	12/10/2010	LAST	W9A10COLE_RFD	14.5	-12.5	-0.429245283	-4.811320755	COLE	1	NA	1.8948	1.8948	1.8948	1.8948	3	1.8948	1.8948	NA	1.8948	1.8948	1.8948	5	1.8948	1.8948	1.8948	1.8948	NA	5	1.8948	1.8948	1.8948	1.8948
133	70134	LPB04_2238	121445	2010	1135	1	5	14	W9A10COLE	3237	43	45	2	4	IRR	1.4093	g/100g	27/10/10 Lucerne	LAST	W9A10COLE_IRR	6.5	16.5	-0.429245283	-4.811320755	COLE	2	1.4093	NA	1.4093	1.4093	1.4093	4	1.4093	1.4093	1.4093	NA	1.4093	1.4093	1	NA	1.4093	1.4093	1.4093	1.4093	5	1.4093	1.4093	1.4093	1.4093
134	70135	AUS33662	125267	2010	2479	1	5	15	W9A10YANA	3107	36	27	1	2	RFD	2.7541	g/100g	23/10/10 Hurricane	LAST	W9A10YANA_RFD	-17.5	13	-0.429245283	-4.811320755	YANA	1	NA	2.7541	2.7541	2.7541	2.7541	1	NA	2.7541	2.7541	2.7541	2.7541	2.7541	5	2.7541	2.7541	2.7541	2.7541	NA	2	2.7541	NA	2.7541	2.7541
135	70136	LANG	121440	2010	1132	1	5	16	W9A10COLE	3232	43	40	2	4	IRR	1.0069	g/100g	27/10/10 Lucerne	LAST	W9A10COLE_IRR	1.5	16.5	-0.429245283	-4.811320755	COLE	5	1.0069	1.0069	1.0069	1.0069	NA	5	1.0069	1.0069	1.0069	1.0069	NA	1.0069	2	1.0069	NA	1.0069	1.0069	1.0069	3	1.0069	1.0069	NA	1.0069
136	70137	VW3404	124991	2010	2382	1	5	17	W9A10YANA	2831	33	15	1	1	IRR	2.2135	g/100g	23/10/10 Lucerne	LAST	W9A10YANA_IRR	-29.5	10	-0.429245283	-4.811320755	YANA	5	2.2135	2.2135	2.2135	2.2135	NA	5	2.2135	2.2135	2.2135	2.2135	NA	2.2135	2	2.2135	NA	2.2135	2.2135	2.2135	4	2.2135	2.2135	2.2135	NA
137	70138	VW1194	123419	2010	1843	1	5	18	W9A10YANA	1259	15	27	1	2	RFD	2.1661	g/100g	23/10/10 Lucerne	LAST	W9A10YANA_RFD	-17.5	-8	-0.429245283	-4.811320755	YANA	4	2.1661	2.1661	2.1661	NA	2.1661	1	NA	2.1661	2.1661	2.1661	2.1661	2.1661	3	2.1661	2.1661	NA	2.1661	2.1661	2	2.1661	NA	2.1661	2.1661
138	70139	DIAMONDBIRD	119076	2010	291	1	5	19	W9A10COLE	868	12	32	1	1	IRR	1.5119	g/100g	12/10/2010	LAST	W9A10COLE_IRR	-6.5	-14.5	-0.429245283	-4.811320755	COLE	4	1.5119	1.5119	1.5119	NA	1.5119	1	NA	1.5119	1.5119	1.5119	1.5119	1.5119	2	1.5119	NA	1.5119	1.5119	1.5119	4	1.5119	1.5119	1.5119	NA
139	70140	WW19147	125461	2010	2552	1	5	20	W9A10YANA	3301	38	45	2	3	RFD	2.0157	g/100g	30/10/10 Lucerne	LAST	W9A10YANA_RFD	0.5	15	-0.429245283	-4.811320755	YANA	5	2.0157	2.0157	2.0157	2.0157	NA	4	2.0157	2.0157	2.0157	NA	2.0157	2.0157	4	2.0157	2.0157	2.0157	NA	2.0157	2	2.0157	NA	2.0157	2.0157
140	70141	WW19753	124071	2010	2071	1	5	21	W9A10YANA	1911	22	63	2	3	RFD	2.1826	g/100g	30/10/10 Hurricane	LAST	W9A10YANA_RFD	18.5	-1	-0.429245283	-4.811320755	YANA	4	2.1826	2.1826	2.1826	NA	2.1826	5	2.1826	2.1826	2.1826	2.1826	NA	2.1826	1	NA	2.1826	2.1826	2.1826	2.1826	1	NA	2.1826	2.1826	2.1826
141	70142	WW20140	118502	2010	95	1	5	22	W9A10COLE	294	4	66	1	1	IRR	1.3636	g/100g	19/10/2010	LAST	W9A10COLE_IRR	27.5	-22.5	-0.429245283	-4.811320755	COLE	3	1.3636	1.3636	NA	1.3636	1.3636	4	1.3636	1.3636	1.3636	NA	1.3636	1.3636	4	1.3636	1.3636	1.3636	NA	1.3636	5	1.3636	1.3636	1.3636	1.3636
142	70143	WW20672	122539	2010	1523	1	5	23	W9A10YANA	379	5	27	1	2	RFD	2.1573	g/100g	23/10/10 Lucerne	LAST	W9A10YANA_RFD	-17.5	-18	-0.429245283	-4.811320755	YANA	4	2.1573	2.1573	2.1573	NA	2.1573	3	2.1573	2.1573	NA	2.1573	2.1573	2.1573	2	2.1573	NA	2.1573	2.1573	2.1573	2	2.1573	NA	2.1573	2.1573
143	70144	DIAMONDBIRD	124704	2010	2277	1	5	24	W9A10YANA	2544	29	80	2	4	IRR	1.3287	g/100g	30/10/10 Hurricane	LAST	W9A10YANA_IRR	35.5	6	-0.429245283	-4.811320755	YANA	4	1.3287	1.3287	1.3287	NA	1.3287	1	NA	1.3287	1.3287	1.3287	1.3287	1.3287	2	1.3287	NA	1.3287	1.3287	1.3287	4	1.3287	1.3287	1.3287	NA
144	70145	WW19514	118257	2010	15	1	5	25	W9A10COLE	49	1	49	1	1	IRR	1.4276	g/100g	12/10/2010	LAST	W9A10COLE_IRR	10.5	-25.5	-0.429245283	-4.811320755	COLE	2	1.4276	NA	1.4276	1.4276	1.4276	2	1.4276	NA	1.4276	1.4276	1.4276	1.4276	4	1.4276	1.4276	1.4276	NA	1.4276	4	1.4276	1.4276	1.4276	NA
145	70147	VW1864	122828	2010	1622	1	5	27	W9A10YANA	668	8	52	2	3	RFD	2.1161	g/100g	30/10/10 Lucerne	LAST	W9A10YANA_RFD	7.5	-15	-0.429245283	-4.811320755	YANA	5	2.1161	2.1161	2.1161	2.1161	NA	1	NA	2.1161	2.1161	2.1161	2.1161	2.1161	4	2.1161	2.1161	2.1161	NA	2.1161	4	2.1161	2.1161	2.1161	NA
146	70148	HRZ05_0159	124380	2010	2181	1	5	28	W9A10YANA	2220	26	20	1	1	IRR	2.1534	g/100g	23/10/10 Lucerne	LAST	W9A10YANA_IRR	-24.5	3	-0.429245283	-4.811320755	YANA	2	2.1534	NA	2.1534	2.1534	2.1534	3	2.1534	2.1534	NA	2.1534	2.1534	2.1534	1	NA	2.1534	2.1534	2.1534	2.1534	1	NA	2.1534	2.1534	2.1534
147	70149	AXE	121396	2010	1114	1	5	29	W9A10COLE	3188	42	72	2	4	IRR	1.9338	g/100g	27/10/10 Lucerne	LAST	W9A10COLE_IRR	33.5	15.5	-0.429245283	-4.811320755	COLE	2	1.9338	NA	1.9338	1.9338	1.9338	4	1.9338	1.9338	1.9338	NA	1.9338	1.9338	1	NA	1.9338	1.9338	1.9338	1.9338	5	1.9338	1.9338	1.9338	1.9338
148	70150	WW18827	120110	2010	674	1	5	30	W9A10COLE	1902	26	2	1	2	RFD	1.4281	g/100g	19/10/2010	LAST	W9A10COLE_RFD	-36.5	-0.5	-0.429245283	-4.811320755	COLE	5	1.4281	1.4281	1.4281	1.4281	NA	5	1.4281	1.4281	1.4281	1.4281	NA	1.4281	3	1.4281	1.4281	NA	1.4281	1.4281	2	1.4281	NA	1.4281	1.4281
149	70151	H45	123217	2010	1773	1	6	1	W9A10YANA	1057	13	1	1	1	IRR	2.6103	g/100g	23/10/10 Hurricane	LAST	W9A10YANA_IRR	-43.5	-10	0.570754717	-4.811320755	YANA	1	NA	2.6103	2.6103	2.6103	2.6103	3	2.6103	2.6103	NA	2.6103	2.6103	2.6103	5	2.6103	2.6103	2.6103	2.6103	NA	5	2.6103	2.6103	2.6103	2.6103
150	70152	WW19561	122840	2010	1626	1	6	2	W9A10YANA	680	8	64	2	3	RFD	1.8477	g/100g	30/10/10 Hurricane	LAST	W9A10YANA_RFD	19.5	-15	0.570754717	-4.811320755	YANA	5	1.8477	1.8477	1.8477	1.8477	NA	2	1.8477	NA	1.8477	1.8477	1.8477	1.8477	2	1.8477	NA	1.8477	1.8477	1.8477	4	1.8477	1.8477	1.8477	NA
151	70153	VT1022	121209	2010	1050	1	6	3	W9A10COLE	3001	40	37	2	4	IRR	1.8271	g/100g	27/10/10 Lucerne	LAST	W9A10COLE_IRR	-1.5	13.5	0.570754717	-4.811320755	COLE	5	1.8271	1.8271	1.8271	1.8271	NA	5	1.8271	1.8271	1.8271	1.8271	NA	1.8271	3	1.8271	1.8271	NA	1.8271	1.8271	3	1.8271	1.8271	NA	1.8271
152	70154	R901D	123536	2010	1884	1	6	4	W9A10YANA	1376	16	56	2	3	RFD	2.1805	g/100g	30/10/10 Lucerne	LAST	W9A10YANA_RFD	11.5	-7	0.570754717	-4.811320755	YANA	1	NA	2.1805	2.1805	2.1805	2.1805	1	NA	2.1805	2.1805	2.1805	2.1805	2.1805	1	NA	2.1805	2.1805	2.1805	2.1805	3	2.1805	2.1805	NA	2.1805
153	70155	AXE	122594	2010	1541	1	6	5	W9A10YANA	434	5	82	2	4	IRR	1.3	g/100g	30/10/10 Hurricane	LAST	W9A10YANA_IRR	37.5	-18	0.570754717	-4.811320755	YANA	2	1.3	NA	1.3	1.3	1.3	4	1.3	1.3	1.3	NA	1.3	1.3	1	NA	1.3	1.3	1.3	1.3	5	1.3	1.3	1.3	1.3
154	70156	HRZ04_0321	123866	2010	1992	1	6	6	W9A10YANA	1706	20	34	1	2	RFD	2.2273	g/100g	23/10/10 Hurricane	LAST	W9A10YANA_RFD	-10.5	-3	0.570754717	-4.811320755	YANA	4	2.2273	2.2273	2.2273	NA	2.2273	2	2.2273	NA	2.2273	2.2273	2.2273	2.2273	3	2.2273	2.2273	NA	2.2273	2.2273	1	NA	2.2273	2.2273	2.2273
155	70157	334609_1	118850	2010	205	1	6	7	W9A10COLE	642	9	34	1	1	IRR	1.8428	g/100g	12/10/2010	LAST	W9A10COLE_IRR	-4.5	-17.5	0.570754717	-4.811320755	COLE	1	NA	1.8428	1.8428	1.8428	1.8428	3	1.8428	1.8428	NA	1.8428	1.8428	1.8428	5	1.8428	1.8428	1.8428	1.8428	NA	3	1.8428	1.8428	NA	1.8428
156	70158	RAC1502	121415	2010	1122	1	6	8	W9A10COLE	3207	43	15	2	4	IRR	2.0197	g/100g	27/10/10 Lucerne	LAST	W9A10COLE_IRR	-23.5	16.5	0.570754717	-4.811320755	COLE	2	2.0197	NA	2.0197	2.0197	2.0197	2	2.0197	NA	2.0197	2.0197	2.0197	2.0197	5	2.0197	2.0197	2.0197	2.0197	NA	4	2.0197	2.0197	2.0197	NA
157	70159	AUS33585	122820	2010	1618	1	6	9	W9A10YANA	660	8	44	1	2	RFD	1.9318	g/100g	23/10/10 Hurricane	LAST	W9A10YANA_RFD	-0.5	-15	0.570754717	-4.811320755	YANA	3	1.9318	1.9318	NA	1.9318	1.9318	3	1.9318	1.9318	NA	1.9318	1.9318	1.9318	2	1.9318	NA	1.9318	1.9318	1.9318	1	NA	1.9318	1.9318	1.9318
158	70161	WW13773	125645	2010	2608	1	6	11	W9A10YANA	3485	40	53	2	3	RFD	2.2426	g/100g	30/10/10 Hurricane	LAST	W9A10YANA_RFD	8.5	17	0.570754717	-4.811320755	YANA	1	NA	2.2426	2.2426	2.2426	2.2426	1	NA	2.2426	2.2426	2.2426	2.2426	2.2426	4	2.2426	2.2426	2.2426	NA	2.2426	4	2.2426	2.2426	2.2426	NA
159	70162	SENTINEL	123549	2010	1889	1	6	12	W9A10YANA	1389	16	69	2	4	IRR	2.2702	g/100g	30/10/10 Hurricane	LAST	W9A10YANA_IRR	24.5	-7	0.570754717	-4.811320755	YANA	3	2.2702	2.2702	NA	2.2702	2.2702	4	2.2702	2.2702	2.2702	NA	2.2702	2.2702	2	2.2702	NA	2.2702	2.2702	2.2702	3	2.2702	2.2702	NA	2.2702
160	70163	HRZ05_0283	122232	2010	1415	1	6	13	W9A10YANA	72	1	72	2	4	IRR	1.9225	g/100g	30/10/10 Hurricane	LAST	W9A10YANA_IRR	27.5	-22	0.570754717	-4.811320755	YANA	4	1.9225	1.9225	1.9225	NA	1.9225	1	NA	1.9225	1.9225	1.9225	1.9225	1.9225	1	NA	1.9225	1.9225	1.9225	1.9225	4	1.9225	1.9225	1.9225	NA
161	70164	WW18957	122801	2010	1611	1	6	14	W9A10YANA	641	8	25	1	2	RFD	2.4288	g/100g	23/10/10 Hurricane	LAST	W9A10YANA_RFD	-19.5	-15	0.570754717	-4.811320755	YANA	5	2.4288	2.4288	2.4288	2.4288	NA	4	2.4288	2.4288	2.4288	NA	2.4288	2.4288	5	2.4288	2.4288	2.4288	2.4288	NA	5	2.4288	2.4288	2.4288	2.4288
162	70166	WW20484	124496	2010	2216	1	6	16	W9A10YANA	2336	27	48	2	3	RFD	1.9612	g/100g	30/10/10 Hurricane	LAST	W9A10YANA_RFD	3.5	4	0.570754717	-4.811320755	YANA	4	1.9612	1.9612	1.9612	NA	1.9612	5	1.9612	1.9612	1.9612	1.9612	NA	1.9612	3	1.9612	1.9612	NA	1.9612	1.9612	1	NA	1.9612	1.9612	1.9612
163	70167	WW18949	120472	2010	779	1	6	17	W9A10COLE	2264	30	60	2	3	RFD	2.8057	g/100g	27/10/10 Lucerne	LAST	W9A10COLE_RFD	21.5	3.5	0.570754717	-4.811320755	COLE	5	2.8057	2.8057	2.8057	2.8057	NA	3	2.8057	2.8057	NA	2.8057	2.8057	2.8057	2	2.8057	NA	2.8057	2.8057	2.8057	4	2.8057	2.8057	2.8057	NA
164	70168	VV2678	119562	2010	491	1	6	18	W9A10COLE	1354	18	62	1	2	RFD	1.896	g/100g	12/10/2010	LAST	W9A10COLE_RFD	23.5	-8.5	0.570754717	-4.811320755	COLE	1	NA	1.896	1.896	1.896	1.896	2	1.896	NA	1.896	1.896	1.896	1.896	3	1.896	1.896	NA	1.896	1.896	1	NA	1.896	1.896	1.896
165	70169	HRZ06_0033	119434	2010	450	1	6	19	W9A10COLE	1226	17	10	1	2	RFD	1.8002	g/100g	19/10/2010	LAST	W9A10COLE_RFD	-28.5	-9.5	0.570754717	-4.811320755	COLE	2	1.8002	NA	1.8002	1.8002	1.8002	3	1.8002	1.8002	NA	1.8002	1.8002	1.8002	5	1.8002	1.8002	1.8002	1.8002	NA	4	1.8002	1.8002	1.8002	NA
166	70170	AUS33697	122398	2010	1475	1	6	20	W9A10YANA	238	3	62	2	3	RFD	1.9894	g/100g	30/10/10 Lucerne	LAST	W9A10YANA_RFD	17.5	-20	0.570754717	-4.811320755	YANA	3	1.9894	1.9894	NA	1.9894	1.9894	2	1.9894	NA	1.9894	1.9894	1.9894	1.9894	5	1.9894	1.9894	1.9894	1.9894	NA	1	NA	1.9894	1.9894	1.9894
167	70172	HRZ06_0250	118428	2010	69	1	6	22	W9A10COLE	220	3	68	1	1	IRR	0.9927	g/100g	19/10/2010	LAST	W9A10COLE_IRR	29.5	-23.5	0.570754717	-4.811320755	COLE	1	NA	0.9927	0.9927	0.9927	0.9927	3	0.9927	0.9927	NA	0.9927	0.9927	0.9927	4	0.9927	0.9927	0.9927	NA	0.9927	5	0.9927	0.9927	0.9927	0.9927
168	70173	RAC1374	126052	2010	2754	1	6	23	W9A10YANA	3892	45	20	1	1	IRR	1.9056	g/100g	23/10/10 Lucerne	LAST	W9A10YANA_IRR	-24.5	22	0.570754717	-4.811320755	YANA	1	NA	1.9056	1.9056	1.9056	1.9056	1	NA	1.9056	1.9056	1.9056	1.9056	1.9056	5	1.9056	1.9056	1.9056	1.9056	NA	2	1.9056	NA	1.9056	1.9056
169	70174	CHARA	119216	2010	355	1	6	24	W9A10COLE	1008	14	20	1	2	RFD	1.6713	g/100g	19/10/2010	LAST	W9A10COLE_RFD	-18.5	-12.5	0.570754717	-4.811320755	COLE	5	1.6713	1.6713	1.6713	1.6713	NA	4	1.6713	1.6713	1.6713	NA	1.6713	1.6713	5	1.6713	1.6713	1.6713	1.6713	NA	5	1.6713	1.6713	1.6713	1.6713
170	70175	QT12667	122979	2010	1682	1	6	25	W9A10YANA	819	10	27	1	2	RFD	2.5728	g/100g	23/10/10 Hurricane	LAST	W9A10YANA_RFD	-17.5	-13	0.570754717	-4.811320755	YANA	3	2.5728	2.5728	NA	2.5728	2.5728	2	2.5728	NA	2.5728	2.5728	2.5728	2.5728	1	NA	2.5728	2.5728	2.5728	2.5728	5	2.5728	2.5728	2.5728	2.5728
171	70176	WW19826	124356	2010	2169	1	6	26	W9A10YANA	2196	25	84	2	4	IRR	1.9753	g/100g	30/10/10 Hurricane	LAST	W9A10YANA_IRR	39.5	2	0.570754717	-4.811320755	YANA	1	NA	1.9753	1.9753	1.9753	1.9753	5	1.9753	1.9753	1.9753	1.9753	NA	1.9753	4	1.9753	1.9753	1.9753	NA	1.9753	5	1.9753	1.9753	1.9753	1.9753
172	70177	VQ2791	124583	2010	2241	1	6	27	W9A10YANA	2423	28	47	2	3	RFD	1.3496	g/100g	30/10/10 Lucerne	LAST	W9A10YANA_RFD	2.5	5	0.570754717	-4.811320755	YANA	3	1.3496	1.3496	NA	1.3496	1.3496	4	1.3496	1.3496	1.3496	NA	1.3496	1.3496	4	1.3496	1.3496	1.3496	NA	1.3496	4	1.3496	1.3496	1.3496	NA
173	70178	VW3744	123149	2010	1742	1	6	28	W9A10YANA	989	12	21	1	1	IRR	2.0235	g/100g	23/10/10 Lucerne	LAST	W9A10YANA_IRR	-23.5	-11	0.570754717	-4.811320755	YANA	1	NA	2.0235	2.0235	2.0235	2.0235	4	2.0235	2.0235	2.0235	NA	2.0235	2.0235	3	2.0235	2.0235	NA	2.0235	2.0235	4	2.0235	2.0235	2.0235	NA
174	70179	WW13735	124181	2010	2107	1	6	29	W9A10YANA	2021	23	85	2	4	IRR	1.698	g/100g	30/10/10 Hurricane	LAST	W9A10YANA_IRR	40.5	0	0.570754717	-4.811320755	YANA	1	NA	1.698	1.698	1.698	1.698	2	1.698	NA	1.698	1.698	1.698	1.698	1	NA	1.698	1.698	1.698	1.698	5	1.698	1.698	1.698	1.698
175	70180	HRZ06_2202	125140	2010	2435	1	6	30	W9A10YANA	2980	34	76	2	4	IRR	2.353	g/100g	30/10/10 Hurricane	LAST	W9A10YANA_IRR	31.5	11	0.570754717	-4.811320755	YANA	2	2.353	NA	2.353	2.353	2.353	5	2.353	2.353	2.353	2.353	NA	2.353	1	NA	2.353	2.353	2.353	2.353	3	2.353	2.353	NA	2.353
176	70181	VW0241	126002	2010	2738	1	7	1	W9A10YANA	3842	44	58	2	3	RFD	1.7001	g/100g	30/10/10 Lucerne	LAST	W9A10YANA_RFD	13.5	21	1.570754717	-4.811320755	YANA	4	1.7001	1.7001	1.7001	NA	1.7001	5	1.7001	1.7001	1.7001	1.7001	NA	1.7001	3	1.7001	1.7001	NA	1.7001	1.7001	2	1.7001	NA	1.7001	1.7001
177	70182	WW19733	125949	2010	2716	1	7	2	W9A10YANA	3789	44	5	1	1	IRR	1.7732	g/100g	23/10/10 Lucerne	LAST	W9A10YANA_IRR	-39.5	21	1.570754717	-4.811320755	YANA	5	1.7732	1.7732	1.7732	1.7732	NA	1	NA	1.7732	1.7732	1.7732	1.7732	1.7732	1	NA	1.7732	1.7732	1.7732	1.7732	4	1.7732	1.7732	1.7732	NA
178	70183	SUN559A	124995	2010	2384	1	7	3	W9A10YANA	2835	33	19	1	1	IRR	1.6285	g/100g	23/10/10 Lucerne	LAST	W9A10YANA_IRR	-25.5	10	1.570754717	-4.811320755	YANA	4	1.6285	1.6285	1.6285	NA	1.6285	1	NA	1.6285	1.6285	1.6285	1.6285	1.6285	4	1.6285	1.6285	1.6285	NA	1.6285	5	1.6285	1.6285	1.6285	1.6285
179	70184	VENTURA	119052	2010	277	1	7	4	W9A10COLE	844	12	8	1	1	IRR	1.8526	g/100g	19/10/2010	LAST	W9A10COLE_IRR	-30.5	-14.5	1.570754717	-4.811320755	COLE	1	NA	1.8526	1.8526	1.8526	1.8526	5	1.8526	1.8526	1.8526	1.8526	NA	1.8526	4	1.8526	1.8526	1.8526	NA	1.8526	4	1.8526	1.8526	1.8526	NA
180	70185	HRZ04_0354	121227	2010	1054	1	7	5	W9A10COLE	3019	40	55	2	4	IRR	1.7708	g/100g	27/10/10 Lucerne	LAST	W9A10COLE_IRR	16.5	13.5	1.570754717	-4.811320755	COLE	2	1.7708	NA	1.7708	1.7708	1.7708	4	1.7708	1.7708	1.7708	NA	1.7708	1.7708	5	1.7708	1.7708	1.7708	1.7708	NA	2	1.7708	NA	1.7708	1.7708
181	70186	WW16452	118830	2010	200	1	7	6	W9A10COLE	622	9	14	1	1	IRR	1.751	g/100g	12/10/2010	LAST	W9A10COLE_IRR	-24.5	-17.5	1.570754717	-4.811320755	COLE	2	1.751	NA	1.751	1.751	1.751	1	NA	1.751	1.751	1.751	1.751	1.751	4	1.751	1.751	1.751	NA	1.751	4	1.751	1.751	1.751	NA
182	70187	WYUNA	120929	2010	947	1	7	7	W9A10COLE	2721	36	61	2	3	RFD	1.4805	g/100g	27/10/10 Lucerne	LAST	W9A10COLE_RFD	22.5	9.5	1.570754717	-4.811320755	COLE	2	1.4805	NA	1.4805	1.4805	1.4805	4	1.4805	1.4805	1.4805	NA	1.4805	1.4805	4	1.4805	1.4805	1.4805	NA	1.4805	4	1.4805	1.4805	1.4805	NA
183	70188	HRZ04_0420	119860	2010	581	1	7	8	W9A10COLE	1652	22	56	1	2	RFD	1.4453	g/100g	19/10/2010	LAST	W9A10COLE_RFD	17.5	-4.5	1.570754717	-4.811320755	COLE	2	1.4453	NA	1.4453	1.4453	1.4453	1	NA	1.4453	1.4453	1.4453	1.4453	1.4453	2	1.4453	NA	1.4453	1.4453	1.4453	5	1.4453	1.4453	1.4453	1.4453
184	70189	VW1174	124442	2010	2200	1	7	9	W9A10YANA	2282	26	82	2	4	IRR	1.2053	g/100g	30/10/10 Hurricane	LAST	W9A10YANA_IRR	37.5	3	1.570754717	-4.811320755	YANA	3	1.2053	1.2053	NA	1.2053	1.2053	4	1.2053	1.2053	1.2053	NA	1.2053	1.2053	1	NA	1.2053	1.2053	1.2053	1.2053	5	1.2053	1.2053	1.2053	1.2053
185	70190	BOLAC	119294	2010	401	1	7	10	W9A10COLE	1086	15	22	1	2	RFD	1.2812	g/100g	19/10/2010	LAST	W9A10COLE_RFD	-16.5	-11.5	1.570754717	-4.811320755	COLE	4	1.2812	1.2812	1.2812	NA	1.2812	5	1.2812	1.2812	1.2812	1.2812	NA	1.2812	2	1.2812	NA	1.2812	1.2812	1.2812	3	1.2812	1.2812	NA	1.2812
186	70191	ATTILA	123334	2010	1808	1	7	11	W9A10YANA	1174	14	30	1	2	RFD	2.3625	g/100g	23/10/10 Hurricane	LAST	W9A10YANA_RFD	-14.5	-9	1.570754717	-4.811320755	YANA	1	NA	2.3625	2.3625	2.3625	2.3625	5	2.3625	2.3625	2.3625	2.3625	NA	2.3625	3	2.3625	2.3625	NA	2.3625	2.3625	1	NA	2.3625	2.3625	2.3625
187	70192	EGA_STAMPEDE	123406	2010	1836	1	7	12	W9A10YANA	1246	15	14	1	1	IRR	1.6525	g/100g	23/10/10 Lucerne	LAST	W9A10YANA_IRR	-30.5	-8	1.570754717	-4.811320755	YANA	2	1.6525	NA	1.6525	1.6525	1.6525	1	NA	1.6525	1.6525	1.6525	1.6525	1.6525	2	1.6525	NA	1.6525	1.6525	1.6525	5	1.6525	1.6525	1.6525	1.6525
188	70193	LPB04_2264	123992	2010	2039	1	7	13	W9A10YANA	1832	21	72	2	4	IRR	1.4849	g/100g	30/10/10 Hurricane	LAST	W9A10YANA_IRR	27.5	-2	1.570754717	-4.811320755	YANA	3	1.4849	1.4849	NA	1.4849	1.4849	4	1.4849	1.4849	1.4849	NA	1.4849	1.4849	1	NA	1.4849	1.4849	1.4849	1.4849	1	NA	1.4849	1.4849	1.4849
189	70194	90670_91	123308	2010	1801	1	7	14	W9A10YANA	1148	14	4	1	1	IRR	1.9871	g/100g	23/10/10 Hurricane	LAST	W9A10YANA_IRR	-40.5	-9	1.570754717	-4.811320755	YANA	1	NA	1.9871	1.9871	1.9871	1.9871	2	1.9871	NA	1.9871	1.9871	1.9871	1.9871	1	NA	1.9871	1.9871	1.9871	1.9871	1	NA	1.9871	1.9871	1.9871
190	70195	WW19954	118456	2010	83	1	7	15	W9A10COLE	248	4	20	1	1	IRR	1.1356	g/100g	19/10/2010	LAST	W9A10COLE_IRR	-18.5	-22.5	1.570754717	-4.811320755	COLE	2	1.1356	NA	1.1356	1.1356	1.1356	5	1.1356	1.1356	1.1356	1.1356	NA	1.1356	4	1.1356	1.1356	1.1356	NA	1.1356	3	1.1356	1.1356	NA	1.1356
191	70196	HRZ04_0354	119741	2010	546	1	7	16	W9A10COLE	1533	21	13	1	2	RFD	1.6509	g/100g	12/10/2010	LAST	W9A10COLE_RFD	-25.5	-5.5	1.570754717	-4.811320755	COLE	2	1.6509	NA	1.6509	1.6509	1.6509	4	1.6509	1.6509	1.6509	NA	1.6509	1.6509	5	1.6509	1.6509	1.6509	1.6509	NA	2	1.6509	NA	1.6509	1.6509
192	70197	VW1498	121140	2010	1032	1	7	17	W9A10COLE	2932	39	44	2	3	RFD	1.5985	g/100g	27/10/10 Lucerne	LAST	W9A10COLE_RFD	5.5	12.5	1.570754717	-4.811320755	COLE	3	1.5985	1.5985	NA	1.5985	1.5985	1	NA	1.5985	1.5985	1.5985	1.5985	1.5985	5	1.5985	1.5985	1.5985	1.5985	NA	5	1.5985	1.5985	1.5985	1.5985
193	70198	MCCUBBIN	122248	2010	1422	1	7	18	W9A10YANA	88	1	88	2	4	IRR	1.0481	g/100g	30/10/10 Hurricane	LAST	W9A10YANA_IRR	43.5	-22	1.570754717	-4.811320755	YANA	2	1.0481	NA	1.0481	1.0481	1.0481	3	1.0481	1.0481	NA	1.0481	1.0481	1.0481	2	1.0481	NA	1.0481	1.0481	1.0481	4	1.0481	1.0481	1.0481	NA
194	70199	WW19201	119847	2010	580	1	7	19	W9A10COLE	1639	22	43	1	2	RFD	1.81	g/100g	19/10/2010	LAST	W9A10COLE_RFD	4.5	-4.5	1.570754717	-4.811320755	COLE	4	1.81	1.81	1.81	NA	1.81	5	1.81	1.81	1.81	1.81	NA	1.81	4	1.81	1.81	1.81	NA	1.81	4	1.81	1.81	1.81	NA
195	70200	HRZ06_0270	121112	2010	1024	1	7	20	W9A10COLE	2904	39	16	2	3	RFD	1.789	g/100g	27/10/10 Lucerne	LAST	W9A10COLE_RFD	-22.5	12.5	1.570754717	-4.811320755	COLE	2	1.789	NA	1.789	1.789	1.789	2	1.789	NA	1.789	1.789	1.789	1.789	4	1.789	1.789	1.789	NA	1.789	5	1.789	1.789	1.789	1.789
196	70201	VW1286	119186	2010	345	1	7	21	W9A10COLE	978	13	66	1	1	IRR	0.78615	g/100g	19/10/2010	LAST	W9A10COLE_IRR	27.5	-13.5	1.570754717	-4.811320755	COLE	3	0.78615	0.78615	NA	0.78615	0.78615	5	0.78615	0.78615	0.78615	0.78615	NA	0.78615	3	0.78615	0.78615	NA	0.78615	0.78615	4	0.78615	0.78615	0.78615	NA
197	70202	VT1022	126081	2010	2765	1	7	22	W9A10YANA	3921	45	49	2	3	RFD	1.6807	g/100g	30/10/10 Lucerne	LAST	W9A10YANA_RFD	4.5	22	1.570754717	-4.811320755	YANA	5	1.6807	1.6807	1.6807	1.6807	NA	5	1.6807	1.6807	1.6807	1.6807	NA	1.6807	3	1.6807	1.6807	NA	1.6807	1.6807	3	1.6807	1.6807	NA	1.6807
198	70203	VW3195	122875	2010	1639	1	7	23	W9A10YANA	715	9	11	1	1	IRR	1.9334	g/100g	23/10/10 Lucerne	LAST	W9A10YANA_IRR	-33.5	-14	1.570754717	-4.811320755	YANA	2	1.9334	NA	1.9334	1.9334	1.9334	5	1.9334	1.9334	1.9334	1.9334	NA	1.9334	1	NA	1.9334	1.9334	1.9334	1.9334	5	1.9334	1.9334	1.9334	1.9334
199	70204	GLADIUS	124647	2010	2265	1	7	24	W9A10YANA	2487	29	23	1	2	RFD	2.8862	g/100g	23/10/10 Hurricane	LAST	W9A10YANA_RFD	-21.5	6	1.570754717	-4.811320755	YANA	4	2.8862	2.8862	2.8862	NA	2.8862	5	2.8862	2.8862	2.8862	2.8862	NA	2.8862	4	2.8862	2.8862	2.8862	NA	2.8862	5	2.8862	2.8862	2.8862	2.8862
200	70205	HRZ06_0250	119451	2010	457	1	7	25	W9A10COLE	1243	17	27	1	2	RFD	1.6909	g/100g	12/10/2010	LAST	W9A10COLE_RFD	-11.5	-9.5	1.570754717	-4.811320755	COLE	1	NA	1.6909	1.6909	1.6909	1.6909	3	1.6909	1.6909	NA	1.6909	1.6909	1.6909	4	1.6909	1.6909	1.6909	NA	1.6909	5	1.6909	1.6909	1.6909	1.6909
201	70206	WW19565	122226	2010	1411	1	7	26	W9A10YANA	66	1	66	2	3	RFD	1.6362	g/100g	30/10/10 Lucerne	LAST	W9A10YANA_RFD	21.5	-22	1.570754717	-4.811320755	YANA	2	1.6362	NA	1.6362	1.6362	1.6362	5	1.6362	1.6362	1.6362	1.6362	NA	1.6362	5	1.6362	1.6362	1.6362	1.6362	NA	5	1.6362	1.6362	1.6362	1.6362
202	70207	VW2001	120961	2010	967	1	7	27	W9A10COLE	2753	37	17	2	3	RFD	2.0947	g/100g	27/10/10 Lucerne	LAST	W9A10COLE_RFD	-21.5	10.5	1.570754717	-4.811320755	COLE	2	2.0947	NA	2.0947	2.0947	2.0947	5	2.0947	2.0947	2.0947	2.0947	NA	2.0947	4	2.0947	2.0947	2.0947	NA	2.0947	3	2.0947	2.0947	NA	2.0947
203	70208	B1272T	119723	2010	539	1	7	28	W9A10COLE	1515	20	71	1	2	RFD	1.9675	g/100g	19/10/2010	LAST	W9A10COLE_RFD	32.5	-6.5	1.570754717	-4.811320755	COLE	4	1.9675	1.9675	1.9675	NA	1.9675	5	1.9675	1.9675	1.9675	1.9675	NA	1.9675	1	NA	1.9675	1.9675	1.9675	1.9675	1	NA	1.9675	1.9675	1.9675
204	70209	LPB04_2238	120402	2010	753	1	7	29	W9A10COLE	2194	29	66	2	3	RFD	2.1124	g/100g	27/10/10 Lucerne	LAST	W9A10COLE_RFD	27.5	2.5	1.570754717	-4.811320755	COLE	2	2.1124	NA	2.1124	2.1124	2.1124	4	2.1124	2.1124	2.1124	NA	2.1124	2.1124	1	NA	2.1124	2.1124	2.1124	2.1124	5	2.1124	2.1124	2.1124	2.1124
205	70210	AUS33662	120997	2010	982	1	7	30	W9A10COLE	2789	37	53	2	3	RFD	2.1073	g/100g	27/10/10 Lucerne	LAST	W9A10COLE_RFD	14.5	10.5	1.570754717	-4.811320755	COLE	1	NA	2.1073	2.1073	2.1073	2.1073	1	NA	2.1073	2.1073	2.1073	2.1073	2.1073	5	2.1073	2.1073	2.1073	2.1073	NA	2	2.1073	NA	2.1073	2.1073
206	70211	AUS33467	119275	2010	393	1	8	1	W9A10COLE	1067	15	3	1	2	RFD	2.6341	g/100g	19/10/2010	LAST	W9A10COLE_RFD	-35.5	-11.5	2.570754717	-4.811320755	COLE	1	NA	2.6341	2.6341	2.6341	2.6341	1	NA	2.6341	2.6341	2.6341	2.6341	2.6341	3	2.6341	2.6341	NA	2.6341	2.6341	5	2.6341	2.6341	2.6341	2.6341
207	70212	WW19565	118535	2010	106	1	8	2	W9A10COLE	327	5	23	1	1	IRR	1.3185	g/100g	12/10/2010	LAST	W9A10COLE_IRR	-15.5	-21.5	2.570754717	-4.811320755	COLE	2	1.3185	NA	1.3185	1.3185	1.3185	5	1.3185	1.3185	1.3185	1.3185	NA	1.3185	5	1.3185	1.3185	1.3185	1.3185	NA	5	1.3185	1.3185	1.3185	1.3185
208	70213	VW2405	124272	2010	2138	1	8	3	W9A10YANA	2112	24	88	2	4	IRR	1.6316	g/100g	30/10/10 Lucerne	LAST	W9A10YANA_IRR	43.5	1	2.570754717	-4.811320755	YANA	2	1.6316	NA	1.6316	1.6316	1.6316	3	1.6316	1.6316	NA	1.6316	1.6316	1.6316	5	1.6316	1.6316	1.6316	1.6316	NA	1	NA	1.6316	1.6316	1.6316
209	70214	EGA_EAGLEHAWK	120875	2010	915	1	8	4	W9A10COLE	2667	36	7	2	3	RFD	1.8563	g/100g	27/10/10 Lucerne	LAST	W9A10COLE_RFD	-31.5	9.5	2.570754717	-4.811320755	COLE	4	1.8563	1.8563	1.8563	NA	1.8563	5	1.8563	1.8563	1.8563	1.8563	NA	1.8563	5	1.8563	1.8563	1.8563	1.8563	NA	3	1.8563	1.8563	NA	1.8563
210	70215	AUS33466	121764	2010	1240	1	8	5	W9A10COLE	3556	47	60	2	4	IRR	1.719	g/100g	27/10/10 Lucerne	LAST	W9A10COLE_IRR	21.5	20.5	2.570754717	-4.811320755	COLE	1	NA	1.719	1.719	1.719	1.719	1	NA	1.719	1.719	1.719	1.719	1.719	4	1.719	1.719	1.719	NA	1.719	4	1.719	1.719	1.719	NA
211	70216	WW20664	125169	2010	2442	1	8	6	W9A10YANA	3009	35	17	1	1	IRR	2.0457	g/100g	23/10/10 Lucerne	LAST	W9A10YANA_IRR	-27.5	12	2.570754717	-4.811320755	YANA	3	2.0457	2.0457	NA	2.0457	2.0457	3	2.0457	2.0457	NA	2.0457	2.0457	2.0457	2	2.0457	NA	2.0457	2.0457	2.0457	4	2.0457	2.0457	2.0457	NA
212	70217	NLS03SB52	124754	2010	2294	1	8	7	W9A10YANA	2594	30	42	1	2	RFD	2.262	g/100g	23/10/10 Hurricane	LAST	W9A10YANA_RFD	-2.5	7	2.570754717	-4.811320755	YANA	4	2.262	2.262	2.262	NA	2.262	3	2.262	2.262	NA	2.262	2.262	2.262	5	2.262	2.262	2.262	2.262	NA	4	2.262	2.262	2.262	NA
213	70218	HRZ05_0159	119902	2010	596	1	8	8	W9A10COLE	1694	23	22	1	2	RFD	2.1193	g/100g	19/10/2010	LAST	W9A10COLE_RFD	-16.5	-3.5	2.570754717	-4.811320755	COLE	2	2.1193	NA	2.1193	2.1193	2.1193	3	2.1193	2.1193	NA	2.1193	2.1193	2.1193	1	NA	2.1193	2.1193	2.1193	2.1193	1	NA	2.1193	2.1193	2.1193
214	70219	HRZ04_0188	126071	2010	2760	1	8	9	W9A10YANA	3911	45	39	1	2	RFD	2.1204	g/100g	23/10/10 Hurricane	LAST	W9A10YANA_RFD	-5.5	22	2.570754717	-4.811320755	YANA	5	2.1204	2.1204	2.1204	2.1204	NA	2	2.1204	NA	2.1204	2.1204	2.1204	2.1204	2	2.1204	NA	2.1204	2.1204	2.1204	3	2.1204	2.1204	NA	2.1204
215	70220	VT1308	123343	2010	1812	1	8	10	W9A10YANA	1183	14	39	1	2	RFD	2.0583	g/100g	23/10/10 Lucerne	LAST	W9A10YANA_RFD	-5.5	-9	2.570754717	-4.811320755	YANA	2	2.0583	NA	2.0583	2.0583	2.0583	5	2.0583	2.0583	2.0583	2.0583	NA	2.0583	3	2.0583	2.0583	NA	2.0583	2.0583	3	2.0583	2.0583	NA	2.0583
216	70221	RAC1418	122436	2010	1489	1	8	11	W9A10YANA	276	4	12	1	1	IRR	1.8334	g/100g	23/10/10 Lucerne	LAST	W9A10YANA_IRR	-32.5	-19	2.570754717	-4.811320755	YANA	3	1.8334	1.8334	NA	1.8334	1.8334	2	1.8334	NA	1.8334	1.8334	1.8334	1.8334	5	1.8334	1.8334	1.8334	1.8334	NA	4	1.8334	1.8334	1.8334	NA
217	70222	QT13375	123845	2010	1984	1	8	12	W9A10YANA	1685	20	13	1	1	IRR	1.516	g/100g	23/10/10 Lucerne	LAST	W9A10YANA_IRR	-31.5	-3	2.570754717	-4.811320755	YANA	3	1.516	1.516	NA	1.516	1.516	3	1.516	1.516	NA	1.516	1.516	1.516	4	1.516	1.516	1.516	NA	1.516	2	1.516	NA	1.516	1.516
218	70223	EGA_JAEGER	124079	2010	2075	1	8	13	W9A10YANA	1919	22	71	2	4	IRR	1.5598	g/100g	30/10/10 Lucerne	LAST	W9A10YANA_IRR	26.5	-1	2.570754717	-4.811320755	YANA	5	1.5598	1.5598	1.5598	1.5598	NA	1	NA	1.5598	1.5598	1.5598	1.5598	1.5598	5	1.5598	1.5598	1.5598	1.5598	NA	5	1.5598	1.5598	1.5598	1.5598
219	70224	NLS03SB52	122667	2010	1567	1	8	14	W9A10YANA	507	6	67	2	4	IRR	1.9116	g/100g	30/10/10 Hurricane	LAST	W9A10YANA_IRR	22.5	-17	2.570754717	-4.811320755	YANA	4	1.9116	1.9116	1.9116	NA	1.9116	3	1.9116	1.9116	NA	1.9116	1.9116	1.9116	5	1.9116	1.9116	1.9116	1.9116	NA	4	1.9116	1.9116	1.9116	NA
220	70225	WW19954	119261	2010	384	1	8	15	W9A10COLE	1053	14	65	1	2	RFD	1.5284	g/100g	19/10/2010	LAST	W9A10COLE_RFD	26.5	-12.5	2.570754717	-4.811320755	COLE	2	1.5284	NA	1.5284	1.5284	1.5284	5	1.5284	1.5284	1.5284	1.5284	NA	1.5284	4	1.5284	1.5284	1.5284	NA	1.5284	3	1.5284	1.5284	NA	1.5284
221	70226	LPB04_2172	123965	2010	2027	1	8	16	W9A10YANA	1805	21	45	2	3	RFD	2.5528	g/100g	30/10/10 Lucerne	LAST	W9A10YANA_RFD	0.5	-2	2.570754717	-4.811320755	YANA	1	NA	2.5528	2.5528	2.5528	2.5528	4	2.5528	2.5528	2.5528	NA	2.5528	2.5528	2	2.5528	NA	2.5528	2.5528	2.5528	1	NA	2.5528	2.5528	2.5528
222	70227	RAC1505	120638	2010	834	1	8	17	W9A10COLE	2430	32	74	2	3	RFD	2.1118	g/100g	27/10/10 Lucerne	LAST	W9A10COLE_RFD	35.5	5.5	2.570754717	-4.811320755	COLE	2	2.1118	NA	2.1118	2.1118	2.1118	4	2.1118	2.1118	2.1118	NA	2.1118	2.1118	2	2.1118	NA	2.1118	2.1118	2.1118	1	NA	2.1118	2.1118	2.1118
223	70228	SUPER_SERI_1	121424	2010	1124	1	8	18	W9A10COLE	3216	43	24	2	4	IRR	2.0188	g/100g	27/10/10 Hurricane	LAST	W9A10COLE_IRR	-14.5	16.5	2.570754717	-4.811320755	COLE	1	NA	2.0188	2.0188	2.0188	2.0188	3	2.0188	2.0188	NA	2.0188	2.0188	2.0188	5	2.0188	2.0188	2.0188	2.0188	NA	1	NA	2.0188	2.0188	2.0188
224	70229	HRZ06_2178	121778	2010	1246	1	8	19	W9A10COLE	3570	47	74	2	4	IRR	2.318	g/100g	27/10/10 Hurricane	LAST	W9A10COLE_IRR	35.5	20.5	2.570754717	-4.811320755	COLE	3	2.318	2.318	NA	2.318	2.318	1	NA	2.318	2.318	2.318	2.318	2.318	3	2.318	2.318	NA	2.318	2.318	5	2.318	2.318	2.318	2.318
225	70230	WW18924	119402	2010	439	1	8	20	W9A10COLE	1194	16	54	1	2	RFD	1.6548	g/100g	19/10/2010	LAST	W9A10COLE_RFD	15.5	-10.5	2.570754717	-4.811320755	COLE	5	1.6548	1.6548	1.6548	1.6548	NA	3	1.6548	1.6548	NA	1.6548	1.6548	1.6548	1	NA	1.6548	1.6548	1.6548	1.6548	2	1.6548	NA	1.6548	1.6548
226	70231	WW20689	124192	2010	2113	1	8	21	W9A10YANA	2032	24	8	1	1	IRR	1.4828	g/100g	23/10/10 Lucerne	LAST	W9A10YANA_IRR	-36.5	1	2.570754717	-4.811320755	YANA	1	NA	1.4828	1.4828	1.4828	1.4828	1	NA	1.4828	1.4828	1.4828	1.4828	1.4828	4	1.4828	1.4828	1.4828	NA	1.4828	1	NA	1.4828	1.4828	1.4828
227	70232	WW19514	125705	2010	2632	1	8	22	W9A10YANA	3545	41	25	1	2	RFD	2.4187	g/100g	23/10/10 Hurricane	LAST	W9A10YANA_RFD	-19.5	18	2.570754717	-4.811320755	YANA	2	2.4187	NA	2.4187	2.4187	2.4187	2	2.4187	NA	2.4187	2.4187	2.4187	2.4187	4	2.4187	2.4187	2.4187	NA	2.4187	4	2.4187	2.4187	2.4187	NA
228	70233	R901D	121169	2010	1040	1	8	23	W9A10COLE	2961	39	73	2	3	RFD	1.9772	g/100g	27/10/10 Lucerne	LAST	W9A10COLE_RFD	34.5	12.5	2.570754717	-4.811320755	COLE	1	NA	1.9772	1.9772	1.9772	1.9772	1	NA	1.9772	1.9772	1.9772	1.9772	1.9772	1	NA	1.9772	1.9772	1.9772	1.9772	3	1.9772	1.9772	NA	1.9772
229	70234	RAC1418	124580	2010	2239	1	8	24	W9A10YANA	2420	28	44	1	2	RFD	2.0983	g/100g	23/10/10 Hurricane	LAST	W9A10YANA_RFD	-0.5	5	2.570754717	-4.811320755	YANA	3	2.0983	2.0983	NA	2.0983	2.0983	2	2.0983	NA	2.0983	2.0983	2.0983	2.0983	5	2.0983	2.0983	2.0983	2.0983	NA	4	2.0983	2.0983	2.0983	NA
230	70235	WW20406	120378	2010	749	1	8	25	W9A10COLE	2170	29	42	2	3	RFD	1.4485	g/100g	27/10/10 Lucerne	LAST	W9A10COLE_RFD	3.5	2.5	2.570754717	-4.811320755	COLE	3	1.4485	1.4485	NA	1.4485	1.4485	2	1.4485	NA	1.4485	1.4485	1.4485	1.4485	5	1.4485	1.4485	1.4485	1.4485	NA	5	1.4485	1.4485	1.4485	1.4485
231	70236	WW18949	125116	2010	2425	1	8	26	W9A10YANA	2956	34	52	2	3	RFD	1.6042	g/100g	30/10/10 Lucerne	LAST	W9A10YANA_RFD	7.5	11	2.570754717	-4.811320755	YANA	5	1.6042	1.6042	1.6042	1.6042	NA	3	1.6042	1.6042	NA	1.6042	1.6042	1.6042	2	1.6042	NA	1.6042	1.6042	1.6042	4	1.6042	1.6042	1.6042	NA
232	70237	WW14311	119551	2010	488	1	8	27	W9A10COLE	1343	18	51	1	2	RFD	1.6923	g/100g	12/10/2010	LAST	W9A10COLE_RFD	12.5	-8.5	2.570754717	-4.811320755	COLE	3	1.6923	1.6923	NA	1.6923	1.6923	3	1.6923	1.6923	NA	1.6923	1.6923	1.6923	4	1.6923	1.6923	1.6923	NA	1.6923	3	1.6923	1.6923	NA	1.6923
233	70238	WW19866	121277	2010	1067	1	8	28	W9A10COLE	3069	41	29	2	4	IRR	1.352	g/100g	27/10/10 Lucerne	LAST	W9A10COLE_IRR	-9.5	14.5	2.570754717	-4.811320755	COLE	4	1.352	1.352	1.352	NA	1.352	3	1.352	1.352	NA	1.352	1.352	1.352	1	NA	1.352	1.352	1.352	1.352	4	1.352	1.352	1.352	NA
234	70239	VT1155	121798	2010	1254	1	8	29	W9A10COLE	3590	48	18	2	4	IRR	2.289	g/100g	27/10/10 Lucerne	LAST	W9A10COLE_IRR	-20.5	21.5	2.570754717	-4.811320755	COLE	2	2.289	NA	2.289	2.289	2.289	4	2.289	2.289	2.289	NA	2.289	2.289	1	NA	2.289	2.289	2.289	2.289	4	2.289	2.289	2.289	NA
235	70240	WW21873	125356	2010	2512	1	8	30	W9A10YANA	3196	37	28	1	2	RFD	2.0075	g/100g	23/10/10 Hurricane	LAST	W9A10YANA_RFD	-16.5	14	2.570754717	-4.811320755	YANA	3	2.0075	2.0075	NA	2.0075	2.0075	2	2.0075	NA	2.0075	2.0075	2.0075	2.0075	2	2.0075	NA	2.0075	2.0075	2.0075	3	2.0075	2.0075	NA	2.0075
236	70241	VW0241	123309	2010	1802	1	9	1	W9A10YANA	1149	14	5	1	1	IRR	1.3916	g/100g	23/10/10 Hurricane	LAST	W9A10YANA_IRR	-39.5	-9	3.570754717	-4.811320755	YANA	4	1.3916	1.3916	1.3916	NA	1.3916	5	1.3916	1.3916	1.3916	1.3916	NA	1.3916	3	1.3916	1.3916	NA	1.3916	1.3916	2	1.3916	NA	1.3916	1.3916
237	70242	VW3466	121925	2010	1303	1	9	2	W9A10COLE	3717	49	69	2	4	IRR	1.7601	g/100g	27/10/10 Lucerne	LAST	W9A10COLE_IRR	30.5	22.5	3.570754717	-4.811320755	COLE	1	NA	1.7601	1.7601	1.7601	1.7601	3	1.7601	1.7601	NA	1.7601	1.7601	1.7601	4	1.7601	1.7601	1.7601	NA	1.7601	3	1.7601	1.7601	NA	1.7601
238	70243	WW19632	125942	2010	2713	1	9	3	W9A10YANA	3782	43	86	2	4	IRR	1.721	g/100g	30/10/10 Hurricane	LAST	W9A10YANA_IRR	41.5	20	3.570754717	-4.811320755	YANA	3	1.721	1.721	NA	1.721	1.721	4	1.721	1.721	1.721	NA	1.721	1.721	3	1.721	1.721	NA	1.721	1.721	2	1.721	NA	1.721	1.721
239	70244	LPB04_2264	121578	2010	1181	1	9	4	W9A10COLE	3370	45	26	2	4	IRR	1.5612	g/100g	27/10/10 Lucerne	LAST	W9A10COLE_IRR	-12.5	18.5	3.570754717	-4.811320755	COLE	3	1.5612	1.5612	NA	1.5612	1.5612	4	1.5612	1.5612	1.5612	NA	1.5612	1.5612	1	NA	1.5612	1.5612	1.5612	1.5612	1	NA	1.5612	1.5612	1.5612
240	70245	VW3174	125653	2010	2610	1	9	5	W9A10YANA	3493	40	61	2	3	RFD	1.628	g/100g	30/10/10 Lucerne	LAST	W9A10YANA_RFD	16.5	17	3.570754717	-4.811320755	YANA	1	NA	1.628	1.628	1.628	1.628	3	1.628	1.628	NA	1.628	1.628	1.628	4	1.628	1.628	1.628	NA	1.628	1	NA	1.628	1.628	1.628
241	70246	WW18049	118261	2010	17	1	9	6	W9A10COLE	53	1	53	1	1	IRR	0.69095	g/100g	19/10/2010	LAST	W9A10COLE_IRR	14.5	-25.5	3.570754717	-4.811320755	COLE	4	0.69095	0.69095	0.69095	NA	0.69095	1	NA	0.69095	0.69095	0.69095	0.69095	0.69095	5	0.69095	0.69095	0.69095	0.69095	NA	1	NA	0.69095	0.69095	0.69095
242	70247	SENTINEL	125828	2010	2673	1	9	7	W9A10YANA	3668	42	60	2	3	RFD	2.0159	g/100g	30/10/10 Lucerne	LAST	W9A10YANA_RFD	15.5	19	3.570754717	-4.811320755	YANA	3	2.0159	2.0159	NA	2.0159	2.0159	4	2.0159	2.0159	2.0159	NA	2.0159	2.0159	2	2.0159	NA	2.0159	2.0159	2.0159	3	2.0159	2.0159	NA	2.0159
243	70248	HRZ05_0085	125795	2010	2658	1	9	8	W9A10YANA	3635	42	27	1	2	RFD	2.0533	g/100g	23/10/10 Hurricane	LAST	W9A10YANA_RFD	-17.5	19	3.570754717	-4.811320755	YANA	1	NA	2.0533	2.0533	2.0533	2.0533	5	2.0533	2.0533	2.0533	2.0533	NA	2.0533	4	2.0533	2.0533	2.0533	NA	2.0533	4	2.0533	2.0533	2.0533	NA
244	70249	HRZ05_0130	122461	2010	1497	1	9	9	W9A10YANA	301	4	37	1	2	RFD	2.0412	g/100g	23/10/10 Lucerne	LAST	W9A10YANA_RFD	-7.5	-19	3.570754717	-4.811320755	YANA	5	2.0412	2.0412	2.0412	2.0412	NA	2	2.0412	NA	2.0412	2.0412	2.0412	2.0412	5	2.0412	2.0412	2.0412	2.0412	NA	1	NA	2.0412	2.0412	2.0412
245	70250	AUS33697	121657	2010	1206	1	9	10	W9A10COLE	3449	46	29	2	4	IRR	1.3584	g/100g	27/10/10 Lucerne	LAST	W9A10COLE_IRR	-9.5	19.5	3.570754717	-4.811320755	COLE	3	1.3584	1.3584	NA	1.3584	1.3584	2	1.3584	NA	1.3584	1.3584	1.3584	1.3584	5	1.3584	1.3584	1.3584	1.3584	NA	1	NA	1.3584	1.3584	1.3584
246	70251	VW4355	123257	2010	1784	1	9	11	W9A10YANA	1097	13	41	1	2	RFD	1.9027	g/100g	23/10/10 Lucerne	LAST	W9A10YANA_RFD	-3.5	-10	3.570754717	-4.811320755	YANA	4	1.9027	1.9027	1.9027	NA	1.9027	4	1.9027	1.9027	1.9027	NA	1.9027	1.9027	5	1.9027	1.9027	1.9027	1.9027	NA	1	NA	1.9027	1.9027	1.9027
247	70252	HRZ06_0053	119097	2010	302	1	9	12	W9A10COLE	889	12	53	1	1	IRR	1.6269	g/100g	19/10/2010	LAST	W9A10COLE_IRR	14.5	-14.5	3.570754717	-4.811320755	COLE	4	1.6269	1.6269	1.6269	NA	1.6269	3	1.6269	1.6269	NA	1.6269	1.6269	1.6269	4	1.6269	1.6269	1.6269	NA	1.6269	4	1.6269	1.6269	1.6269	NA
248	70253	HRZ06_0079	125494	2010	2563	1	9	13	W9A10YANA	3334	38	78	2	4	IRR	1.2112	g/100g	30/10/10 Hurricane	LAST	W9A10YANA_IRR	33.5	15	3.570754717	-4.811320755	YANA	2	1.2112	NA	1.2112	1.2112	1.2112	1	NA	1.2112	1.2112	1.2112	1.2112	1.2112	3	1.2112	1.2112	NA	1.2112	1.2112	4	1.2112	1.2112	1.2112	NA
249	70254	VW4355	118957	2010	244	1	9	14	W9A10COLE	749	10	65	1	1	IRR	1.3722	g/100g	19/10/2010	LAST	W9A10COLE_IRR	26.5	-16.5	3.570754717	-4.811320755	COLE	4	1.3722	1.3722	1.3722	NA	1.3722	4	1.3722	1.3722	1.3722	NA	1.3722	1.3722	5	1.3722	1.3722	1.3722	1.3722	NA	1	NA	1.3722	1.3722	1.3722
250	70255	EGA_EAGLEHAWK	121425	2010	1125	1	9	15	W9A10COLE	3217	43	25	2	4	IRR	1.7538	g/100g	27/10/10 Hurricane	LAST	W9A10COLE_IRR	-13.5	16.5	3.570754717	-4.811320755	COLE	4	1.7538	1.7538	1.7538	NA	1.7538	5	1.7538	1.7538	1.7538	1.7538	NA	1.7538	5	1.7538	1.7538	1.7538	1.7538	NA	3	1.7538	1.7538	NA	1.7538
251	70256	WW14314	125373	2010	2518	1	9	16	W9A10YANA	3213	37	45	2	3	RFD	1.6822	g/100g	30/10/10 Lucerne	LAST	W9A10YANA_RFD	0.5	14	3.570754717	-4.811320755	YANA	3	1.6822	1.6822	NA	1.6822	1.6822	5	1.6822	1.6822	1.6822	1.6822	NA	1.6822	3	1.6822	1.6822	NA	1.6822	1.6822	3	1.6822	1.6822	NA	1.6822
252	70257	VW2410	124337	2010	2162	1	9	17	W9A10YANA	2177	25	65	2	3	RFD	1.7122	g/100g	30/10/10 Hurricane	LAST	W9A10YANA_RFD	20.5	2	3.570754717	-4.811320755	YANA	4	1.7122	1.7122	1.7122	NA	1.7122	5	1.7122	1.7122	1.7122	1.7122	NA	1.7122	2	1.7122	NA	1.7122	1.7122	1.7122	3	1.7122	1.7122	NA	1.7122
253	70258	EGA_WEDGETAIL	121432	2010	1129	1	9	18	W9A10COLE	3224	43	32	2	4	IRR	1.2146	g/100g	27/10/10 Hurricane	LAST	W9A10COLE_IRR	-6.5	16.5	3.570754717	-4.811320755	COLE	5	1.2146	1.2146	1.2146	1.2146	NA	3	1.2146	1.2146	NA	1.2146	1.2146	1.2146	5	1.2146	1.2146	1.2146	1.2146	NA	3	1.2146	1.2146	NA	1.2146
254	70259	WW20664	125667	2010	2617	1	9	19	W9A10YANA	3507	40	75	2	4	IRR	1.5147	g/100g	30/10/10 Lucerne	LAST	W9A10YANA_IRR	30.5	17	3.570754717	-4.811320755	YANA	3	1.5147	1.5147	NA	1.5147	1.5147	3	1.5147	1.5147	NA	1.5147	1.5147	1.5147	2	1.5147	NA	1.5147	1.5147	1.5147	4	1.5147	1.5147	1.5147	NA
255	70260	VW3717	120974	2010	974	1	9	20	W9A10COLE	2766	37	30	2	3	RFD	1.676	g/100g	27/10/10 Lucerne	LAST	W9A10COLE_RFD	-8.5	10.5	3.570754717	-4.811320755	COLE	1	NA	1.676	1.676	1.676	1.676	4	1.676	1.676	1.676	NA	1.676	1.676	5	1.676	1.676	1.676	1.676	NA	5	1.676	1.676	1.676	1.676
256	70261	VW0241	123858	2010	1990	1	9	21	W9A10YANA	1698	20	26	1	2	RFD	2.0636	g/100g	23/10/10 Hurricane	LAST	W9A10YANA_RFD	-18.5	-3	3.570754717	-4.811320755	YANA	4	2.0636	2.0636	2.0636	NA	2.0636	5	2.0636	2.0636	2.0636	2.0636	NA	2.0636	3	2.0636	2.0636	NA	2.0636	2.0636	2	2.0636	NA	2.0636	2.0636
257	70262	EGA_GREGORY	121413	2010	1120	1	9	22	W9A10COLE	3205	43	13	2	4	IRR	1.6758	g/100g	27/10/10 Lucerne	LAST	W9A10COLE_IRR	-25.5	16.5	3.570754717	-4.811320755	COLE	2	1.6758	NA	1.6758	1.6758	1.6758	4	1.6758	1.6758	1.6758	NA	1.6758	1.6758	5	1.6758	1.6758	1.6758	1.6758	NA	4	1.6758	1.6758	1.6758	NA
258	70263	118849_303	118899	2010	222	1	9	23	W9A10COLE	691	10	7	1	1	IRR	2.5716	g/100g	12/10/2010	LAST	W9A10COLE_IRR	-31.5	-16.5	3.570754717	-4.811320755	COLE	5	2.5716	2.5716	2.5716	2.5716	NA	1	NA	2.5716	2.5716	2.5716	2.5716	2.5716	5	2.5716	2.5716	2.5716	2.5716	NA	5	2.5716	2.5716	2.5716	2.5716
259	70264	VW3457	121684	2010	1214	1	9	24	W9A10COLE	3476	46	56	2	4	IRR	1.7066	g/100g	27/10/10 Hurricane	LAST	W9A10COLE_IRR	17.5	19.5	3.570754717	-4.811320755	COLE	3	1.7066	1.7066	NA	1.7066	1.7066	1	NA	1.7066	1.7066	1.7066	1.7066	1.7066	4	1.7066	1.7066	1.7066	NA	1.7066	4	1.7066	1.7066	1.7066	NA
260	70265	114892_109	120755	2010	882	1	9	25	W9A10COLE	2547	34	39	2	3	RFD	1.8834	g/100g	27/10/10 Lucerne	LAST	W9A10COLE_RFD	0.5	7.5	3.570754717	-4.811320755	COLE	1	NA	1.8834	1.8834	1.8834	1.8834	3	1.8834	1.8834	NA	1.8834	1.8834	1.8834	5	1.8834	1.8834	1.8834	1.8834	NA	5	1.8834	1.8834	1.8834	1.8834
261	70266	WW19733	123107	2010	1727	1	9	26	W9A10YANA	947	11	67	2	4	IRR	0.88925	g/100g	30/10/10 Hurricane	LAST	W9A10YANA_IRR	22.5	-12	3.570754717	-4.811320755	YANA	5	0.88925	0.88925	0.88925	0.88925	NA	1	NA	0.88925	0.88925	0.88925	0.88925	0.88925	1	NA	0.88925	0.88925	0.88925	0.88925	4	0.88925	0.88925	0.88925	NA
262	70267	HRZ04_0515	125074	2010	2408	1	9	27	W9A10YANA	2914	34	10	1	1	IRR	2.2318	g/100g	23/10/10 Lucerne	LAST	W9A10YANA_IRR	-34.5	11	3.570754717	-4.811320755	YANA	5	2.2318	2.2318	2.2318	2.2318	NA	3	2.2318	2.2318	NA	2.2318	2.2318	2.2318	5	2.2318	2.2318	2.2318	2.2318	NA	5	2.2318	2.2318	2.2318	2.2318
263	70268	VW3466	122440	2010	1491	1	9	28	W9A10YANA	280	4	16	1	1	IRR	1.767	g/100g	23/10/10 Lucerne	LAST	W9A10YANA_IRR	-28.5	-19	3.570754717	-4.811320755	YANA	1	NA	1.767	1.767	1.767	1.767	3	1.767	1.767	NA	1.767	1.767	1.767	4	1.767	1.767	1.767	NA	1.767	3	1.767	1.767	NA	1.767
264	70269	WW19632	119509	2010	477	1	9	29	W9A10COLE	1301	18	9	1	2	RFD	2.1258	g/100g	12/10/2010	LAST	W9A10COLE_RFD	-29.5	-8.5	3.570754717	-4.811320755	COLE	3	2.1258	2.1258	NA	2.1258	2.1258	4	2.1258	2.1258	2.1258	NA	2.1258	2.1258	3	2.1258	2.1258	NA	2.1258	2.1258	2	2.1258	NA	2.1258	2.1258
265	70270	HRZ06_0299	122311	2010	1446	1	9	30	W9A10YANA	151	2	63	2	3	RFD	1.4217	g/100g	30/10/10 Lucerne	LAST	W9A10YANA_RFD	18.5	-21	3.570754717	-4.811320755	YANA	2	1.4217	NA	1.4217	1.4217	1.4217	5	1.4217	1.4217	1.4217	1.4217	NA	1.4217	5	1.4217	1.4217	1.4217	1.4217	NA	5	1.4217	1.4217	1.4217	1.4217
266	70271	WW20527	124655	2010	2266	1	10	1	W9A10YANA	2495	29	31	1	2	RFD	2.0973	g/100g	23/10/10 Hurricane	LAST	W9A10YANA_RFD	-13.5	6	4.570754717	-4.811320755	YANA	5	2.0973	2.0973	2.0973	2.0973	NA	4	2.0973	2.0973	2.0973	NA	2.0973	2.0973	5	2.0973	2.0973	2.0973	2.0973	NA	1	NA	2.0973	2.0973	2.0973
267	70272	HRZ04_0354	120584	2010	814	1	10	2	W9A10COLE	2376	32	20	2	3	RFD	2.0666	g/100g	27/10/10 Lucerne	LAST	W9A10COLE_RFD	-18.5	5.5	4.570754717	-4.811320755	COLE	2	2.0666	NA	2.0666	2.0666	2.0666	4	2.0666	2.0666	2.0666	NA	2.0666	2.0666	5	2.0666	2.0666	2.0666	2.0666	NA	2	2.0666	NA	2.0666	2.0666
268	70273	GLADIUS	120959	2010	965	1	10	3	W9A10COLE	2751	37	15	2	3	RFD	2.0508	g/100g	27/10/10 Lucerne	LAST	W9A10COLE_RFD	-23.5	10.5	4.570754717	-4.811320755	COLE	4	2.0508	2.0508	2.0508	NA	2.0508	5	2.0508	2.0508	2.0508	2.0508	NA	2.0508	4	2.0508	2.0508	2.0508	NA	2.0508	5	2.0508	2.0508	2.0508	2.0508
269	70274	HRZ04_0515	120884	2010	922	1	10	4	W9A10COLE	2676	36	16	2	3	RFD	1.6924	g/100g	27/10/10 Lucerne	LAST	W9A10COLE_RFD	-22.5	9.5	4.570754717	-4.811320755	COLE	5	1.6924	1.6924	1.6924	1.6924	NA	3	1.6924	1.6924	NA	1.6924	1.6924	1.6924	5	1.6924	1.6924	1.6924	1.6924	NA	5	1.6924	1.6924	1.6924	1.6924
270	70275	QT12667	124068	2010	2070	1	10	5	W9A10YANA	1908	22	60	2	3	RFD	2.1553	g/100g	30/10/10 Hurricane	LAST	W9A10YANA_RFD	15.5	-1	4.570754717	-4.811320755	YANA	3	2.1553	2.1553	NA	2.1553	2.1553	2	2.1553	NA	2.1553	2.1553	2.1553	2.1553	1	NA	2.1553	2.1553	2.1553	2.1553	5	2.1553	2.1553	2.1553	2.1553
271	70276	VW3473	125777	2010	2653	1	10	6	W9A10YANA	3617	42	9	1	1	IRR	1.6238	g/100g	23/10/10 Lucerne	LAST	W9A10YANA_IRR	-35.5	19	4.570754717	-4.811320755	YANA	1	NA	1.6238	1.6238	1.6238	1.6238	5	1.6238	1.6238	1.6238	1.6238	NA	1.6238	2	1.6238	NA	1.6238	1.6238	1.6238	2	1.6238	NA	1.6238	1.6238
272	70277	WW19490	121001	2010	985	1	10	7	W9A10COLE	2793	37	57	2	3	RFD	1.8065	g/100g	27/10/10 Lucerne	LAST	W9A10COLE_RFD	18.5	10.5	4.570754717	-4.811320755	COLE	3	1.8065	1.8065	NA	1.8065	1.8065	5	1.8065	1.8065	1.8065	1.8065	NA	1.8065	5	1.8065	1.8065	1.8065	1.8065	NA	4	1.8065	1.8065	1.8065	NA
273	70278	QT13390	123364	2010	1818	1	10	8	W9A10YANA	1204	14	60	2	3	RFD	1.7608	g/100g	30/10/10 Hurricane	LAST	W9A10YANA_RFD	15.5	-9	4.570754717	-4.811320755	YANA	2	1.7608	NA	1.7608	1.7608	1.7608	5	1.7608	1.7608	1.7608	1.7608	NA	1.7608	5	1.7608	1.7608	1.7608	1.7608	NA	4	1.7608	1.7608	1.7608	NA
274	70279	VW0379	122176	2010	1395	1	10	9	W9A10YANA	16	1	16	1	1	IRR	1.4018	g/100g	23/10/10 Lucerne	LAST	W9A10YANA_IRR	-28.5	-22	4.570754717	-4.811320755	YANA	1	NA	1.4018	1.4018	1.4018	1.4018	1	NA	1.4018	1.4018	1.4018	1.4018	1.4018	3	1.4018	1.4018	NA	1.4018	1.4018	5	1.4018	1.4018	1.4018	1.4018
275	70280	GLADIUS	119338	2010	419	1	10	10	W9A10COLE	1130	15	66	1	2	RFD	1.707	g/100g	19/10/2010	LAST	W9A10COLE_RFD	27.5	-11.5	4.570754717	-4.811320755	COLE	4	1.707	1.707	1.707	NA	1.707	5	1.707	1.707	1.707	1.707	NA	1.707	4	1.707	1.707	1.707	NA	1.707	5	1.707	1.707	1.707	1.707
276	70281	WW20469	125596	2010	2592	1	10	11	W9A10YANA	3436	40	4	1	1	IRR	2.002	g/100g	23/10/10 Lucerne	LAST	W9A10YANA_IRR	-40.5	17	4.570754717	-4.811320755	YANA	4	2.002	2.002	2.002	NA	2.002	4	2.002	2.002	2.002	NA	2.002	2.002	2	2.002	NA	2.002	2.002	2.002	2	2.002	NA	2.002	2.002
277	70282	VV2678	121484	2010	1155	1	10	12	W9A10COLE	3276	44	8	2	4	IRR	1.4605	g/100g	27/10/10 Lucerne	LAST	W9A10COLE_IRR	-30.5	17.5	4.570754717	-4.811320755	COLE	1	NA	1.4605	1.4605	1.4605	1.4605	2	1.4605	NA	1.4605	1.4605	1.4605	1.4605	3	1.4605	1.4605	NA	1.4605	1.4605	1	NA	1.4605	1.4605	1.4605
278	70283	VW4326	120496	2010	783	1	10	13	W9A10COLE	2288	31	8	2	3	RFD	1.7016	g/100g	27/10/10 Lucerne	LAST	W9A10COLE_RFD	-30.5	4.5	4.570754717	-4.811320755	COLE	3	1.7016	1.7016	NA	1.7016	1.7016	4	1.7016	1.7016	1.7016	NA	1.7016	1.7016	3	1.7016	1.7016	NA	1.7016	1.7016	2	1.7016	NA	1.7016	1.7016
279	70284	RAC1393	121781	2010	1248	1	10	14	W9A10COLE	3573	48	1	2	4	IRR	1.8383	g/100g	27/10/10 Lucerne	LAST	W9A10COLE_IRR	-37.5	21.5	4.570754717	-4.811320755	COLE	3	1.8383	1.8383	NA	1.8383	1.8383	4	1.8383	1.8383	1.8383	NA	1.8383	1.8383	1	NA	1.8383	1.8383	1.8383	1.8383	5	1.8383	1.8383	1.8383	1.8383
280	70285	WW15839	120128	2010	681	1	10	15	W9A10COLE	1920	26	20	1	2	RFD	1.6653	g/100g	19/10/2010	LAST	W9A10COLE_RFD	-18.5	-0.5	4.570754717	-4.811320755	COLE	1	NA	1.6653	1.6653	1.6653	1.6653	2	1.6653	NA	1.6653	1.6653	1.6653	1.6653	1	NA	1.6653	1.6653	1.6653	1.6653	5	1.6653	1.6653	1.6653	1.6653
281	70286	WW19884	124148	2010	2098	1	10	16	W9A10YANA	1988	23	52	2	3	RFD	1.6218	g/100g	30/10/10 Lucerne	LAST	W9A10YANA_RFD	7.5	0	4.570754717	-4.811320755	YANA	1	NA	1.6218	1.6218	1.6218	1.6218	3	1.6218	1.6218	NA	1.6218	1.6218	1.6218	2	1.6218	NA	1.6218	1.6218	1.6218	2	1.6218	NA	1.6218	1.6218
282	70287	HRZ04_0531	122257	2010	1425	1	10	17	W9A10YANA	97	2	9	1	1	IRR	1.6648	g/100g	23/10/10 Lucerne	LAST	W9A10YANA_IRR	-35.5	-21	4.570754717	-4.811320755	YANA	5	1.6648	1.6648	1.6648	1.6648	NA	4	1.6648	1.6648	1.6648	NA	1.6648	1.6648	5	1.6648	1.6648	1.6648	1.6648	NA	3	1.6648	1.6648	NA	1.6648
283	70288	WW18925	119544	2010	484	1	10	18	W9A10COLE	1336	18	44	1	2	RFD	1.8201	g/100g	19/10/2010	LAST	W9A10COLE_RFD	5.5	-8.5	4.570754717	-4.811320755	COLE	4	1.8201	1.8201	1.8201	NA	1.8201	2	1.8201	NA	1.8201	1.8201	1.8201	1.8201	2	1.8201	NA	1.8201	1.8201	1.8201	3	1.8201	1.8201	NA	1.8201
284	70289	WW20667	120682	2010	855	1	10	19	W9A10COLE	2474	33	42	2	3	RFD	1.5712	g/100g	27/10/10 Lucerne	LAST	W9A10COLE_RFD	3.5	6.5	4.570754717	-4.811320755	COLE	2	1.5712	NA	1.5712	1.5712	1.5712	2	1.5712	NA	1.5712	1.5712	1.5712	1.5712	4	1.5712	1.5712	1.5712	NA	1.5712	5	1.5712	1.5712	1.5712	1.5712
285	70290	VW3195	119442	2010	453	1	10	20	W9A10COLE	1234	17	18	1	2	RFD	2.0268	g/100g	12/10/2010	LAST	W9A10COLE_RFD	-20.5	-9.5	4.570754717	-4.811320755	COLE	2	2.0268	NA	2.0268	2.0268	2.0268	5	2.0268	2.0268	2.0268	2.0268	NA	2.0268	1	NA	2.0268	2.0268	2.0268	2.0268	5	2.0268	2.0268	2.0268	2.0268
286	70291	WW20652	119588	2010	498	1	10	21	W9A10COLE	1380	19	12	1	2	RFD	1.9199	g/100g	23/10/10 Lucerne	LAST	W9A10COLE_RFD	-26.5	-7.5	4.570754717	-4.811320755	COLE	4	1.9199	1.9199	1.9199	NA	1.9199	1	NA	1.9199	1.9199	1.9199	1.9199	1.9199	2	1.9199	NA	1.9199	1.9199	1.9199	1	NA	1.9199	1.9199	1.9199
287	70292	WW18769	122501	2010	1510	1	10	22	W9A10YANA	341	4	77	2	4	IRR	1.3999	g/100g	30/10/10 Lucerne	LAST	W9A10YANA_IRR	32.5	-19	4.570754717	-4.811320755	YANA	4	1.3999	1.3999	1.3999	NA	1.3999	1	NA	1.3999	1.3999	1.3999	1.3999	1.3999	3	1.3999	1.3999	NA	1.3999	1.3999	1	NA	1.3999	1.3999	1.3999
288	70293	RAC1429	124721	2010	2285	1	10	23	W9A10YANA	2561	30	9	1	1	IRR	2.116	g/100g	23/10/10 Lucerne	LAST	W9A10YANA_IRR	-35.5	7	4.570754717	-4.811320755	YANA	5	2.116	2.116	2.116	2.116	NA	2	2.116	NA	2.116	2.116	2.116	2.116	3	2.116	2.116	NA	2.116	2.116	4	2.116	2.116	2.116	NA
289	70294	WW18791	119393	2010	436	1	10	24	W9A10COLE	1185	16	45	1	2	RFD	2.0382	g/100g	19/10/2010	LAST	W9A10COLE_RFD	6.5	-10.5	4.570754717	-4.811320755	COLE	5	2.0382	2.0382	2.0382	2.0382	NA	1	NA	2.0382	2.0382	2.0382	2.0382	2.0382	4	2.0382	2.0382	2.0382	NA	2.0382	1	NA	2.0382	2.0382	2.0382
290	70295	WW13735	123178	2010	1754	1	10	25	W9A10YANA	1018	12	50	2	3	RFD	2.2511	g/100g	30/10/10 Hurricane	LAST	W9A10YANA_RFD	5.5	-11	4.570754717	-4.811320755	YANA	1	NA	2.2511	2.2511	2.2511	2.2511	2	2.2511	NA	2.2511	2.2511	2.2511	2.2511	1	NA	2.2511	2.2511	2.2511	2.2511	5	2.2511	2.2511	2.2511	2.2511
291	70296	VW1152	122418	2010	1485	1	10	26	W9A10YANA	258	3	82	2	4	IRR	1.4681	g/100g	30/10/10 Lucerne	LAST	W9A10YANA_IRR	37.5	-20	4.570754717	-4.811320755	YANA	1	NA	1.4681	1.4681	1.4681	1.4681	4	1.4681	1.4681	1.4681	NA	1.4681	1.4681	2	1.4681	NA	1.4681	1.4681	1.4681	5	1.4681	1.4681	1.4681	1.4681
292	70297	LPB04_2324	123489	2010	1862	1	10	27	W9A10YANA	1329	16	9	1	1	IRR	2.1401	g/100g	23/10/10 Lucerne	LAST	W9A10YANA_IRR	-35.5	-7	4.570754717	-4.811320755	YANA	2	2.1401	NA	2.1401	2.1401	2.1401	3	2.1401	2.1401	NA	2.1401	2.1401	2.1401	5	2.1401	2.1401	2.1401	2.1401	NA	2	2.1401	NA	2.1401	2.1401
293	70298	VS2177	118437	2010	73	1	10	28	W9A10COLE	229	4	1	1	1	IRR	2.4556	g/100g	19/10/2010	LAST	W9A10COLE_IRR	-37.5	-22.5	4.570754717	-4.811320755	COLE	2	2.4556	NA	2.4556	2.4556	2.4556	5	2.4556	2.4556	2.4556	2.4556	NA	2.4556	2	2.4556	NA	2.4556	2.4556	2.4556	2	2.4556	NA	2.4556	2.4556
294	70299	HRZ03_0005	123682	2010	1929	1	10	29	W9A10YANA	1522	18	26	1	2	RFD	2.0051	g/100g	23/10/10 Hurricane	LAST	W9A10YANA_RFD	-18.5	-5	4.570754717	-4.811320755	YANA	1	NA	2.0051	2.0051	2.0051	2.0051	4	2.0051	2.0051	2.0051	NA	2.0051	2.0051	5	2.0051	2.0051	2.0051	2.0051	NA	5	2.0051	2.0051	2.0051	2.0051
295	70300	TAMMARIN_ROCK	123917	2010	2013	1	10	30	W9A10YANA	1757	20	85	2	4	IRR	1.8236	g/100g	27/10/10 Lucerne	LAST	W9A10YANA_IRR	40.5	-3	4.570754717	-4.811320755	YANA	3	1.8236	1.8236	NA	1.8236	1.8236	4	1.8236	1.8236	1.8236	NA	1.8236	1.8236	1	NA	1.8236	1.8236	1.8236	1.8236	2	1.8236	NA	1.8236	1.8236
296	70301	HRZ04_0227	124215	2010	2121	2	1	1	W9A10YANA	2055	24	31	1	2	RFD	2.9293	g/100g	23/10/10 Hurricane	LAST	W9A10YANA_RFD	-13.5	1	-4.429245283	-3.811320755	YANA	1	NA	2.9293	2.9293	2.9293	2.9293	4	2.9293	2.9293	2.9293	NA	2.9293	2.9293	2	2.9293	NA	2.9293	2.9293	2.9293	2	2.9293	NA	2.9293	2.9293
297	70302	EGA_JAEGER	125156	2010	2437	2	1	2	W9A10YANA	2996	35	4	1	1	IRR	1.7916	g/100g	23/10/10 Lucerne	LAST	W9A10YANA_IRR	-40.5	12	-4.429245283	-3.811320755	YANA	5	1.7916	1.7916	1.7916	1.7916	NA	1	NA	1.7916	1.7916	1.7916	1.7916	1.7916	5	1.7916	1.7916	1.7916	1.7916	NA	5	1.7916	1.7916	1.7916	1.7916
298	70303	WW20256	124087	2010	2079	2	1	3	W9A10YANA	1927	22	79	2	4	IRR	1.6825	g/100g	30/10/10 Hurricane	LAST	W9A10YANA_IRR	34.5	-1	-4.429245283	-3.811320755	YANA	2	1.6825	NA	1.6825	1.6825	1.6825	5	1.6825	1.6825	1.6825	1.6825	NA	1.6825	2	1.6825	NA	1.6825	1.6825	1.6825	1	NA	1.6825	1.6825	1.6825
299	70304	VW4368	121453	2010	1139	2	1	4	W9A10COLE	3245	43	53	2	4	IRR	1.5506	g/100g	27/10/10 Hurricane	LAST	W9A10COLE_IRR	14.5	16.5	-4.429245283	-3.811320755	COLE	4	1.5506	1.5506	1.5506	NA	1.5506	3	1.5506	1.5506	NA	1.5506	1.5506	1.5506	2	1.5506	NA	1.5506	1.5506	1.5506	1	NA	1.5506	1.5506	1.5506
300	70305	WW19750	121755	2010	1237	2	1	5	W9A10COLE	3547	47	51	2	4	IRR	1.4308	g/100g	27/10/10 Hurricane	LAST	W9A10COLE_IRR	12.5	20.5	-4.429245283	-3.811320755	COLE	3	1.4308	1.4308	NA	1.4308	1.4308	1	NA	1.4308	1.4308	1.4308	1.4308	1.4308	2	1.4308	NA	1.4308	1.4308	1.4308	2	1.4308	NA	1.4308	1.4308
301	70306	WYUNA	119055	2010	279	2	1	6	W9A10COLE	847	12	11	1	1	IRR	0.86783	g/100g	19/10/2010	LAST	W9A10COLE_IRR	-27.5	-14.5	-4.429245283	-3.811320755	COLE	2	0.86783	NA	0.86783	0.86783	0.86783	4	0.86783	0.86783	0.86783	NA	0.86783	0.86783	4	0.86783	0.86783	0.86783	NA	0.86783	4	0.86783	0.86783	0.86783	NA
302	70307	EGA_WILLS	121361	2010	1094	2	1	7	W9A10COLE	3153	42	37	2	4	IRR	1.8842	g/100g	27/10/10 Lucerne	LAST	W9A10COLE_IRR	-1.5	15.5	-4.429245283	-3.811320755	COLE	3	1.8842	1.8842	NA	1.8842	1.8842	1	NA	1.8842	1.8842	1.8842	1.8842	1.8842	5	1.8842	1.8842	1.8842	1.8842	NA	2	1.8842	NA	1.8842	1.8842
303	70308	VW2405	124916	2010	2352	2	1	8	W9A10YANA	2756	32	28	1	2	RFD	2.0926	g/100g	23/10/10 Hurricane	LAST	W9A10YANA_RFD	-16.5	9	-4.429245283	-3.811320755	YANA	2	2.0926	NA	2.0926	2.0926	2.0926	3	2.0926	2.0926	NA	2.0926	2.0926	2.0926	5	2.0926	2.0926	2.0926	2.0926	NA	1	NA	2.0926	2.0926	2.0926
304	70309	WW19525	121668	2010	1209	2	1	9	W9A10COLE	3460	46	40	2	4	IRR	1.2206	g/100g	27/10/10 Hurricane	LAST	W9A10COLE_IRR	1.5	19.5	-4.429245283	-3.811320755	COLE	1	NA	1.2206	1.2206	1.2206	1.2206	4	1.2206	1.2206	1.2206	NA	1.2206	1.2206	2	1.2206	NA	1.2206	1.2206	1.2206	5	1.2206	1.2206	1.2206	1.2206
305	70310	WI25099	122976	2010	1681	2	1	10	W9A10YANA	816	10	24	1	2	RFD	1.9873	g/100g	23/10/10 Hurricane	LAST	W9A10YANA_RFD	-20.5	-13	-4.429245283	-3.811320755	YANA	2	1.9873	NA	1.9873	1.9873	1.9873	1	NA	1.9873	1.9873	1.9873	1.9873	1.9873	2	1.9873	NA	1.9873	1.9873	1.9873	1	NA	1.9873	1.9873	1.9873
306	70311	HRZ05_0130	119116	2010	312	2	1	11	W9A10COLE	908	12	72	1	1	IRR	0.94437	g/100g	12/10/2010	LAST	W9A10COLE_IRR	33.5	-14.5	-4.429245283	-3.811320755	COLE	5	0.94437	0.94437	0.94437	0.94437	NA	2	0.94437	NA	0.94437	0.94437	0.94437	0.94437	5	0.94437	0.94437	0.94437	0.94437	NA	1	NA	0.94437	0.94437	0.94437
307	70312	VW2373	124373	2010	2176	2	1	12	W9A10YANA	2213	26	13	1	1	IRR	1.427	g/100g	23/10/10 Lucerne	LAST	W9A10YANA_IRR	-31.5	3	-4.429245283	-3.811320755	YANA	3	1.427	1.427	NA	1.427	1.427	5	1.427	1.427	1.427	1.427	NA	1.427	5	1.427	1.427	1.427	1.427	NA	5	1.427	1.427	1.427	1.427
308	70313	RAC1393	125993	2010	2734	2	1	13	W9A10YANA	3833	44	49	2	3	RFD	2.0968	g/100g	30/10/10 Lucerne	LAST	W9A10YANA_RFD	4.5	21	-4.429245283	-3.811320755	YANA	3	2.0968	2.0968	NA	2.0968	2.0968	4	2.0968	2.0968	2.0968	NA	2.0968	2.0968	1	NA	2.0968	2.0968	2.0968	2.0968	5	2.0968	2.0968	2.0968	2.0968
309	70314	HRZ04_0157	125177	2010	2445	2	1	14	W9A10YANA	3017	35	25	1	2	RFD	2.5393	g/100g	23/10/10 Hurricane	LAST	W9A10YANA_RFD	-19.5	12	-4.429245283	-3.811320755	YANA	2	2.5393	NA	2.5393	2.5393	2.5393	5	2.5393	2.5393	2.5393	2.5393	NA	2.5393	2	2.5393	NA	2.5393	2.5393	2.5393	3	2.5393	2.5393	NA	2.5393
310	70315	QT13375	121576	2010	1180	2	1	15	W9A10COLE	3368	45	24	2	4	IRR	1.5519	g/100g	27/10/10 Lucerne	LAST	W9A10COLE_IRR	-14.5	18.5	-4.429245283	-3.811320755	COLE	3	1.5519	1.5519	NA	1.5519	1.5519	3	1.5519	1.5519	NA	1.5519	1.5519	1.5519	4	1.5519	1.5519	1.5519	NA	1.5519	2	1.5519	NA	1.5519	1.5519
311	70317	WW13710	124986	2010	2377	2	1	17	W9A10YANA	2826	33	10	1	1	IRR	1.4669	g/100g	23/10/10 Lucerne	LAST	W9A10YANA_IRR	-34.5	10	-4.429245283	-3.811320755	YANA	5	1.4669	1.4669	1.4669	1.4669	NA	4	1.4669	1.4669	1.4669	NA	1.4669	1.4669	4	1.4669	1.4669	1.4669	NA	1.4669	1	NA	1.4669	1.4669	1.4669
312	70318	VU2828_1	121735	2010	1233	2	1	18	W9A10COLE	3527	47	31	2	4	IRR	1.5284	g/100g	27/10/10 Lucerne	LAST	W9A10COLE_IRR	-7.5	20.5	-4.429245283	-3.811320755	COLE	5	1.5284	1.5284	1.5284	1.5284	NA	4	1.5284	1.5284	1.5284	NA	1.5284	1.5284	1	NA	1.5284	1.5284	1.5284	1.5284	3	1.5284	1.5284	NA	1.5284
313	70319	SUPER_SERI_1	119284	2010	397	2	1	19	W9A10COLE	1076	15	12	1	2	RFD	1.9551	g/100g	19/10/2010	LAST	W9A10COLE_RFD	-26.5	-11.5	-4.429245283	-3.811320755	COLE	1	NA	1.9551	1.9551	1.9551	1.9551	3	1.9551	1.9551	NA	1.9551	1.9551	1.9551	5	1.9551	1.9551	1.9551	1.9551	NA	1	NA	1.9551	1.9551	1.9551
314	70320	HRZ04_0513	122334	2010	1452	2	1	20	W9A10YANA	174	2	86	2	4	IRR	2.2398	g/100g	30/10/10 Hurricane	LAST	W9A10YANA_IRR	41.5	-21	-4.429245283	-3.811320755	YANA	2	2.2398	NA	2.2398	2.2398	2.2398	1	NA	2.2398	2.2398	2.2398	2.2398	2.2398	2	2.2398	NA	2.2398	2.2398	2.2398	3	2.2398	2.2398	NA	2.2398
315	70322	VW3708	121604	2010	1191	2	1	22	W9A10COLE	3396	45	52	2	4	IRR	1.851	g/100g	27/10/10 Lucerne	LAST	W9A10COLE_IRR	13.5	18.5	-4.429245283	-3.811320755	COLE	4	1.851	1.851	1.851	NA	1.851	2	1.851	NA	1.851	1.851	1.851	1.851	2	1.851	NA	1.851	1.851	1.851	4	1.851	1.851	1.851	NA
316	70323	HRZ04_0206	118723	2010	162	2	1	23	W9A10COLE	515	7	59	1	1	IRR	1.6549	g/100g	12/10/2010	LAST	W9A10COLE_IRR	20.5	-19.5	-4.429245283	-3.811320755	COLE	1	NA	1.6549	1.6549	1.6549	1.6549	1	NA	1.6549	1.6549	1.6549	1.6549	1.6549	4	1.6549	1.6549	1.6549	NA	1.6549	4	1.6549	1.6549	1.6549	NA
317	70324	VW0394	118425	2010	68	2	1	24	W9A10COLE	217	3	65	1	1	IRR	1.144	g/100g	19/10/2010	LAST	W9A10COLE_IRR	26.5	-23.5	-4.429245283	-3.811320755	COLE	2	1.144	NA	1.144	1.144	1.144	1	NA	1.144	1.144	1.144	1.144	1.144	5	1.144	1.144	1.144	1.144	NA	2	1.144	NA	1.144	1.144
318	70325	SUN559A	122670	2010	1570	2	1	25	W9A10YANA	510	6	70	2	4	IRR	1.2107	g/100g	30/10/10 Lucerne	LAST	W9A10YANA_IRR	25.5	-17	-4.429245283	-3.811320755	YANA	4	1.2107	1.2107	1.2107	NA	1.2107	1	NA	1.2107	1.2107	1.2107	1.2107	1.2107	4	1.2107	1.2107	1.2107	NA	1.2107	5	1.2107	1.2107	1.2107	1.2107
319	70326	VW4076	120454	2010	774	2	1	26	W9A10COLE	2246	30	42	2	3	RFD	1.9006	g/100g	27/10/10 Lucerne	LAST	W9A10COLE_RFD	3.5	3.5	-4.429245283	-3.811320755	COLE	2	1.9006	NA	1.9006	1.9006	1.9006	2	1.9006	NA	1.9006	1.9006	1.9006	1.9006	2	1.9006	NA	1.9006	1.9006	1.9006	5	1.9006	1.9006	1.9006	1.9006
320	70327	WW19663	123359	2010	1817	2	1	27	W9A10YANA	1199	14	55	2	3	RFD	1.8042	g/100g	30/10/10 Lucerne	LAST	W9A10YANA_RFD	10.5	-9	-4.429245283	-3.811320755	YANA	1	NA	1.8042	1.8042	1.8042	1.8042	5	1.8042	1.8042	1.8042	1.8042	NA	1.8042	3	1.8042	1.8042	NA	1.8042	1.8042	2	1.8042	NA	1.8042	1.8042
321	70328	EGA_STAMPEDE	125128	2010	2431	2	1	28	W9A10YANA	2968	34	64	2	3	RFD	1.803	g/100g	30/10/10 Lucerne	LAST	W9A10YANA_RFD	19.5	11	-4.429245283	-3.811320755	YANA	2	1.803	NA	1.803	1.803	1.803	1	NA	1.803	1.803	1.803	1.803	1.803	2	1.803	NA	1.803	1.803	1.803	5	1.803	1.803	1.803	1.803
322	70329	B1272C4	118234	2010	9	2	1	29	W9A10COLE	26	1	26	1	1	IRR	1.7968	g/100g	12/10/2010	LAST	W9A10COLE_IRR	-12.5	-25.5	-4.429245283	-3.811320755	COLE	1	NA	1.7968	1.7968	1.7968	1.7968	1	NA	1.7968	1.7968	1.7968	1.7968	1.7968	2	1.7968	NA	1.7968	1.7968	1.7968	3	1.7968	1.7968	NA	1.7968
323	70330	WW19716	124706	2010	2278	2	1	30	W9A10YANA	2546	29	82	2	4	IRR	1.5095	g/100g	30/10/10 Lucerne	LAST	W9A10YANA_IRR	37.5	6	-4.429245283	-3.811320755	YANA	5	1.5095	1.5095	1.5095	1.5095	NA	5	1.5095	1.5095	1.5095	1.5095	NA	1.5095	4	1.5095	1.5095	1.5095	NA	1.5095	2	1.5095	NA	1.5095	1.5095
324	70331	WW19987	122998	2010	1692	2	2	1	W9A10YANA	838	10	46	2	3	RFD	1.7963	g/100g	30/10/10 Hurricane	LAST	W9A10YANA_RFD	1.5	-13	-3.429245283	-3.811320755	YANA	1	NA	1.7963	1.7963	1.7963	1.7963	1	NA	1.7963	1.7963	1.7963	1.7963	1.7963	5	1.7963	1.7963	1.7963	1.7963	NA	1	NA	1.7963	1.7963	1.7963
325	70332	WW19665	125851	2010	2681	2	2	2	W9A10YANA	3691	42	83	2	4	IRR	1.2692	g/100g	30/10/10 Lucerne	LAST	W9A10YANA_IRR	38.5	19	-3.429245283	-3.811320755	YANA	5	1.2692	1.2692	1.2692	1.2692	NA	1	NA	1.2692	1.2692	1.2692	1.2692	1.2692	3	1.2692	1.2692	NA	1.2692	1.2692	2	1.2692	NA	1.2692	1.2692
326	70333	VW1193	120897	2010	927	2	2	3	W9A10COLE	2689	36	29	2	3	RFD	1.3767	g/100g	27/10/10 Lucerne	LAST	W9A10COLE_RFD	-9.5	9.5	-3.429245283	-3.811320755	COLE	4	1.3767	1.3767	1.3767	NA	1.3767	1	NA	1.3767	1.3767	1.3767	1.3767	1.3767	3	1.3767	1.3767	NA	1.3767	1.3767	3	1.3767	1.3767	NA	1.3767
327	70334	PEAKE	124264	2010	2135	2	2	4	W9A10YANA	2104	24	80	2	4	IRR	1.8871	g/100g	30/10/10 Hurricane	LAST	W9A10YANA_IRR	35.5	1	-3.429245283	-3.811320755	YANA	5	1.8871	1.8871	1.8871	1.8871	NA	4	1.8871	1.8871	1.8871	NA	1.8871	1.8871	1	NA	1.8871	1.8871	1.8871	1.8871	4	1.8871	1.8871	1.8871	NA
328	70335	HRZ06_0514	125720	2010	2636	2	2	5	W9A10YANA	3560	41	40	1	2	RFD	1.6557	g/100g	23/10/10 Hurricane	LAST	W9A10YANA_RFD	-4.5	18	-3.429245283	-3.811320755	YANA	3	1.6557	1.6557	NA	1.6557	1.6557	5	1.6557	1.6557	1.6557	1.6557	NA	1.6557	4	1.6557	1.6557	1.6557	NA	1.6557	4	1.6557	1.6557	1.6557	NA
329	70336	VW3398	121039	2010	1001	2	2	6	W9A10COLE	2831	38	19	2	3	RFD	2.1869	g/100g	27/10/10 Lucerne	LAST	W9A10COLE_RFD	-19.5	11.5	-3.429245283	-3.811320755	COLE	2	2.1869	NA	2.1869	2.1869	2.1869	3	2.1869	2.1869	NA	2.1869	2.1869	2.1869	1	NA	2.1869	2.1869	2.1869	2.1869	3	2.1869	2.1869	NA	2.1869
330	70337	RAC1442	125580	2010	2589	2	2	7	W9A10YANA	3420	39	76	2	4	IRR	1.4191	g/100g	30/10/10 Hurricane	LAST	W9A10YANA_IRR	31.5	16	-3.429245283	-3.811320755	YANA	5	1.4191	1.4191	1.4191	1.4191	NA	5	1.4191	1.4191	1.4191	1.4191	NA	1.4191	1	NA	1.4191	1.4191	1.4191	1.4191	4	1.4191	1.4191	1.4191	NA
331	70338	WW20571	121376	2010	1102	2	2	8	W9A10COLE	3168	42	52	2	4	IRR	1.8259	g/100g	27/10/10 Lucerne	LAST	W9A10COLE_IRR	13.5	15.5	-3.429245283	-3.811320755	COLE	2	1.8259	NA	1.8259	1.8259	1.8259	4	1.8259	1.8259	1.8259	NA	1.8259	1.8259	4	1.8259	1.8259	1.8259	NA	1.8259	3	1.8259	1.8259	NA	1.8259
332	70339	AUS33697	125073	2010	2407	2	2	9	W9A10YANA	2913	34	9	1	1	IRR	1.7131	g/100g	23/10/10 Lucerne	LAST	W9A10YANA_IRR	-35.5	11	-3.429245283	-3.811320755	YANA	3	1.7131	1.7131	NA	1.7131	1.7131	2	1.7131	NA	1.7131	1.7131	1.7131	1.7131	5	1.7131	1.7131	1.7131	1.7131	NA	1	NA	1.7131	1.7131	1.7131
333	70340	SUN562A	122751	2010	1596	2	2	10	W9A10YANA	591	7	63	2	3	RFD	1.5949	g/100g	30/10/10 Lucerne	LAST	W9A10YANA_RFD	18.5	-16	-3.429245283	-3.811320755	YANA	4	1.5949	1.5949	1.5949	NA	1.5949	3	1.5949	1.5949	NA	1.5949	1.5949	1.5949	1	NA	1.5949	1.5949	1.5949	1.5949	2	1.5949	NA	1.5949	1.5949
334	70341	VW3405	125399	2010	2526	2	2	11	W9A10YANA	3239	37	71	2	4	IRR	1.3908	g/100g	30/10/10 Lucerne	LAST	W9A10YANA_IRR	26.5	14	-3.429245283	-3.811320755	YANA	3	1.3908	1.3908	NA	1.3908	1.3908	3	1.3908	1.3908	NA	1.3908	1.3908	1.3908	1	NA	1.3908	1.3908	1.3908	1.3908	5	1.3908	1.3908	1.3908	1.3908
335	70342	VW2708	123943	2010	2021	2	2	12	W9A10YANA	1783	21	23	1	2	RFD	2.8247	g/100g	23/10/10 Hurricane	LAST	W9A10YANA_RFD	-21.5	-2	-3.429245283	-3.811320755	YANA	3	2.8247	2.8247	NA	2.8247	2.8247	1	NA	2.8247	2.8247	2.8247	2.8247	2.8247	5	2.8247	2.8247	2.8247	2.8247	NA	4	2.8247	2.8247	2.8247	NA
336	70343	SUNVALE	125701	2010	2630	2	2	13	W9A10YANA	3541	41	21	1	1	IRR	1.7722	g/100g	23/10/10 Lucerne	LAST	W9A10YANA_IRR	-23.5	18	-3.429245283	-3.811320755	YANA	2	1.7722	NA	1.7722	1.7722	1.7722	1	NA	1.7722	1.7722	1.7722	1.7722	1.7722	5	1.7722	1.7722	1.7722	1.7722	NA	3	1.7722	1.7722	NA	1.7722
337	70344	GASCOIGNE	124344	2010	2164	2	2	14	W9A10YANA	2184	25	72	2	4	IRR	2.2898	g/100g	30/10/10 Lucerne	LAST	W9A10YANA_IRR	27.5	2	-3.429245283	-3.811320755	YANA	4	2.2898	2.2898	2.2898	NA	2.2898	3	2.2898	2.2898	NA	2.2898	2.2898	2.2898	5	2.2898	2.2898	2.2898	2.2898	NA	5	2.2898	2.2898	2.2898	2.2898
338	70345	HRZ05_0245	123123	2010	1735	2	2	15	W9A10YANA	963	11	83	2	4	IRR	1.5606	g/100g	30/10/10 Lucerne	LAST	W9A10YANA_IRR	38.5	-12	-3.429245283	-3.811320755	YANA	3	1.5606	1.5606	NA	1.5606	1.5606	3	1.5606	1.5606	NA	1.5606	1.5606	1.5606	3	1.5606	1.5606	NA	1.5606	1.5606	5	1.5606	1.5606	1.5606	1.5606
339	70346	QT13354	122964	2010	1674	2	2	16	W9A10YANA	804	10	12	1	1	IRR	1.3167	g/100g	23/10/10 Lucerne	LAST	W9A10YANA_IRR	-32.5	-13	-3.429245283	-3.811320755	YANA	3	1.3167	1.3167	NA	1.3167	1.3167	1	NA	1.3167	1.3167	1.3167	1.3167	1.3167	4	1.3167	1.3167	1.3167	NA	1.3167	2	1.3167	NA	1.3167	1.3167
340	70347	118849_303	121004	2010	986	2	2	17	W9A10COLE	2796	37	60	2	3	RFD	1.0795	g/100g	27/10/10 Lucerne	LAST	W9A10COLE_RFD	21.5	10.5	-3.429245283	-3.811320755	COLE	5	1.0795	1.0795	1.0795	1.0795	NA	1	NA	1.0795	1.0795	1.0795	1.0795	1.0795	5	1.0795	1.0795	1.0795	1.0795	NA	5	1.0795	1.0795	1.0795	1.0795
341	70348	WW18049	124090	2010	2080	2	2	18	W9A10YANA	1930	22	82	2	4	IRR	1.2726	g/100g	30/10/10 Hurricane	LAST	W9A10YANA_IRR	37.5	-1	-3.429245283	-3.811320755	YANA	4	1.2726	1.2726	1.2726	NA	1.2726	1	NA	1.2726	1.2726	1.2726	1.2726	1.2726	5	1.2726	1.2726	1.2726	1.2726	NA	1	NA	1.2726	1.2726	1.2726
342	70349	HRZ06_0292	122109	2010	1369	2	2	19	W9A10COLE	3901	52	25	2	4	IRR	1.6459	g/100g	27/10/10 Lucerne	LAST	W9A10COLE_IRR	-13.5	25.5	-3.429245283	-3.811320755	COLE	4	1.6459	1.6459	1.6459	NA	1.6459	2	1.6459	NA	1.6459	1.6459	1.6459	1.6459	1	NA	1.6459	1.6459	1.6459	1.6459	4	1.6459	1.6459	1.6459	NA
343	70350	WW19866	119087	2010	296	2	2	20	W9A10COLE	879	12	43	1	1	IRR	1.8898	g/100g	12/10/2010	LAST	W9A10COLE_IRR	4.5	-14.5	-3.429245283	-3.811320755	COLE	4	1.8898	1.8898	1.8898	NA	1.8898	3	1.8898	1.8898	NA	1.8898	1.8898	1.8898	1	NA	1.8898	1.8898	1.8898	1.8898	4	1.8898	1.8898	1.8898	NA
344	70351	WW20140	126096	2010	2770	2	2	21	W9A10YANA	3936	45	64	2	3	RFD	1.7829	g/100g	30/10/10 Lucerne	LAST	W9A10YANA_RFD	19.5	22	-3.429245283	-3.811320755	YANA	3	1.7829	1.7829	NA	1.7829	1.7829	4	1.7829	1.7829	1.7829	NA	1.7829	1.7829	4	1.7829	1.7829	1.7829	NA	1.7829	5	1.7829	1.7829	1.7829	1.7829
345	70352	WW18569	125655	2010	2611	2	2	22	W9A10YANA	3495	40	63	2	3	RFD	1.9051	g/100g	30/10/10 Lucerne	LAST	W9A10YANA_RFD	18.5	17	-3.429245283	-3.811320755	YANA	5	1.9051	1.9051	1.9051	1.9051	NA	2	1.9051	NA	1.9051	1.9051	1.9051	1.9051	1	NA	1.9051	1.9051	1.9051	1.9051	5	1.9051	1.9051	1.9051	1.9051
346	70353	VW0720	120031	2010	644	2	2	23	W9A10COLE	1823	24	75	1	2	RFD	1.1977	g/100g	12/10/2010	LAST	W9A10COLE_RFD	36.5	-2.5	-3.429245283	-3.811320755	COLE	5	1.1977	1.1977	1.1977	1.1977	NA	4	1.1977	1.1977	1.1977	NA	1.1977	1.1977	3	1.1977	1.1977	NA	1.1977	1.1977	1	NA	1.1977	1.1977	1.1977
347	70354	WW21859	118885	2010	218	2	2	24	W9A10COLE	677	9	69	1	1	IRR	1.0319	g/100g	19/10/2010	LAST	W9A10COLE_IRR	30.5	-17.5	-3.429245283	-3.811320755	COLE	5	1.0319	1.0319	1.0319	1.0319	NA	5	1.0319	1.0319	1.0319	1.0319	NA	1.0319	4	1.0319	1.0319	1.0319	NA	1.0319	5	1.0319	1.0319	1.0319	1.0319
348	70355	LPB04_2238	123839	2010	1982	2	2	25	W9A10YANA	1679	20	7	1	1	IRR	1.8774	g/100g	23/10/10 Lucerne	LAST	W9A10YANA_IRR	-37.5	-3	-3.429245283	-3.811320755	YANA	2	1.8774	NA	1.8774	1.8774	1.8774	4	1.8774	1.8774	1.8774	NA	1.8774	1.8774	1	NA	1.8774	1.8774	1.8774	1.8774	5	1.8774	1.8774	1.8774	1.8774
349	70356	HRZ04_0161	122504	2010	1512	2	2	26	W9A10YANA	344	4	80	2	4	IRR	1.6149	g/100g	30/10/10 Lucerne	LAST	W9A10YANA_IRR	35.5	-19	-3.429245283	-3.811320755	YANA	4	1.6149	1.6149	1.6149	NA	1.6149	2	1.6149	NA	1.6149	1.6149	1.6149	1.6149	1	NA	1.6149	1.6149	1.6149	1.6149	3	1.6149	1.6149	NA	1.6149
350	70358	WW19866	123782	2010	1963	2	2	28	W9A10YANA	1622	19	38	1	2	RFD	2.002	g/100g	23/10/10 Hurricane	LAST	W9A10YANA_RFD	-6.5	-4	-3.429245283	-3.811320755	YANA	4	2.002	2.002	2.002	NA	2.002	3	2.002	2.002	NA	2.002	2.002	2.002	1	NA	2.002	2.002	2.002	2.002	4	2.002	2.002	2.002	NA
351	70359	QT13375	120787	2010	890	2	2	29	W9A10COLE	2579	34	71	2	3	RFD	1.3797	g/100g	27/10/10 Lucerne	LAST	W9A10COLE_RFD	32.5	7.5	-3.429245283	-3.811320755	COLE	3	1.3797	1.3797	NA	1.3797	1.3797	3	1.3797	1.3797	NA	1.3797	1.3797	1.3797	4	1.3797	1.3797	1.3797	NA	1.3797	2	1.3797	NA	1.3797	1.3797
352	70361	WW17062	120280	2010	722	2	3	1	W9A10COLE	2072	28	20	2	3	RFD	1.9202	g/100g	27/10/10 Lucerne	LAST	W9A10COLE_RFD	-18.5	1.5	-2.429245283	-3.811320755	COLE	1	NA	1.9202	1.9202	1.9202	1.9202	1	NA	1.9202	1.9202	1.9202	1.9202	1.9202	5	1.9202	1.9202	1.9202	1.9202	NA	3	1.9202	1.9202	NA	1.9202
353	70362	HRZ06_2087	124866	2010	2337	2	3	2	W9A10YANA	2706	31	66	2	3	RFD	1.8867	g/100g	30/10/10 Lucerne	LAST	W9A10YANA_RFD	21.5	8	-2.429245283	-3.811320755	YANA	2	1.8867	NA	1.8867	1.8867	1.8867	3	1.8867	1.8867	NA	1.8867	1.8867	1.8867	2	1.8867	NA	1.8867	1.8867	1.8867	5	1.8867	1.8867	1.8867	1.8867
354	70363	WW18049	125274	2010	2484	2	3	3	W9A10YANA	3114	36	34	1	2	RFD	1.9281	g/100g	23/10/10 Hurricane	LAST	W9A10YANA_RFD	-10.5	13	-2.429245283	-3.811320755	YANA	4	1.9281	1.9281	1.9281	NA	1.9281	1	NA	1.9281	1.9281	1.9281	1.9281	1.9281	5	1.9281	1.9281	1.9281	1.9281	NA	1	NA	1.9281	1.9281	1.9281
355	70364	WEEBILL1	118450	2010	81	2	3	4	W9A10COLE	242	4	14	1	1	IRR	2.2324	g/100g	12/10/2010	LAST	W9A10COLE_IRR	-24.5	-22.5	-2.429245283	-3.811320755	COLE	2	2.2324	NA	2.2324	2.2324	2.2324	3	2.2324	2.2324	NA	2.2324	2.2324	2.2324	2	2.2324	NA	2.2324	2.2324	2.2324	5	2.2324	2.2324	2.2324	2.2324
356	70365	HRZ04_0227	124878	2010	2342	2	3	5	W9A10YANA	2718	31	78	2	4	IRR	1.9679	g/100g	30/10/10 Hurricane	LAST	W9A10YANA_IRR	33.5	8	-2.429245283	-3.811320755	YANA	1	NA	1.9679	1.9679	1.9679	1.9679	4	1.9679	1.9679	1.9679	NA	1.9679	1.9679	2	1.9679	NA	1.9679	1.9679	1.9679	2	1.9679	NA	1.9679	1.9679
357	70366	VW2694	125709	2010	2634	2	3	6	W9A10YANA	3549	41	29	1	2	RFD	2.551	g/100g	23/10/10 Hurricane	LAST	W9A10YANA_RFD	-15.5	18	-2.429245283	-3.811320755	YANA	4	2.551	2.551	2.551	NA	2.551	5	2.551	2.551	2.551	2.551	NA	2.551	5	2.551	2.551	2.551	2.551	NA	1	NA	2.551	2.551	2.551
358	70367	VW2092	118256	2010	14	2	3	7	W9A10COLE	48	1	48	1	1	IRR	1.6553	g/100g	19/10/2010	LAST	W9A10COLE_IRR	9.5	-25.5	-2.429245283	-3.811320755	COLE	4	1.6553	1.6553	1.6553	NA	1.6553	3	1.6553	1.6553	NA	1.6553	1.6553	1.6553	1	NA	1.6553	1.6553	1.6553	1.6553	3	1.6553	1.6553	NA	1.6553
359	70368	VW1174	120508	2010	787	2	3	8	W9A10COLE	2300	31	20	2	3	RFD	1.9807	g/100g	27/10/10 Lucerne	LAST	W9A10COLE_RFD	-18.5	4.5	-2.429245283	-3.811320755	COLE	3	1.9807	1.9807	NA	1.9807	1.9807	4	1.9807	1.9807	1.9807	NA	1.9807	1.9807	1	NA	1.9807	1.9807	1.9807	1.9807	5	1.9807	1.9807	1.9807	1.9807
360	70369	HRZ06_2202	125954	2010	2717	2	3	9	W9A10YANA	3794	44	10	1	1	IRR	2.2247	g/100g	23/10/10 Lucerne	LAST	W9A10YANA_IRR	-34.5	21	-2.429245283	-3.811320755	YANA	2	2.2247	NA	2.2247	2.2247	2.2247	5	2.2247	2.2247	2.2247	2.2247	NA	2.2247	1	NA	2.2247	2.2247	2.2247	2.2247	3	2.2247	2.2247	NA	2.2247
361	70370	AUS33662	121589	2010	1184	2	3	10	W9A10COLE	3381	45	37	2	4	IRR	1.946	g/100g	27/10/10 Lucerne	LAST	W9A10COLE_IRR	-1.5	18.5	-2.429245283	-3.811320755	COLE	1	NA	1.946	1.946	1.946	1.946	1	NA	1.946	1.946	1.946	1.946	1.946	5	1.946	1.946	1.946	1.946	NA	2	1.946	NA	1.946	1.946
362	70371	VW1174	118859	2010	206	2	3	11	W9A10COLE	651	9	43	1	1	IRR	2.558	g/100g	19/10/2010	LAST	W9A10COLE_IRR	4.5	-17.5	-2.429245283	-3.811320755	COLE	3	2.558	2.558	NA	2.558	2.558	4	2.558	2.558	2.558	NA	2.558	2.558	1	NA	2.558	2.558	2.558	2.558	5	2.558	2.558	2.558	2.558
363	70372	WW19548	122974	2010	1679	2	3	12	W9A10YANA	814	10	22	1	1	IRR	1.1539	g/100g	23/10/10 Lucerne	LAST	W9A10YANA_IRR	-22.5	-13	-2.429245283	-3.811320755	YANA	3	1.1539	1.1539	NA	1.1539	1.1539	2	1.1539	NA	1.1539	1.1539	1.1539	1.1539	3	1.1539	1.1539	NA	1.1539	1.1539	4	1.1539	1.1539	1.1539	NA
364	70373	HRZ06_0079	121077	2010	1020	2	3	13	W9A10COLE	2869	38	57	2	3	RFD	1.647	g/100g	27/10/10 Lucerne	LAST	W9A10COLE_RFD	18.5	11.5	-2.429245283	-3.811320755	COLE	2	1.647	NA	1.647	1.647	1.647	1	NA	1.647	1.647	1.647	1.647	1.647	3	1.647	1.647	NA	1.647	1.647	4	1.647	1.647	1.647	NA
365	70374	WW19954	122797	2010	1609	2	3	14	W9A10YANA	637	8	21	1	1	IRR	1.3998	g/100g	23/10/10 Lucerne	LAST	W9A10YANA_IRR	-23.5	-15	-2.429245283	-3.811320755	YANA	2	1.3998	NA	1.3998	1.3998	1.3998	5	1.3998	1.3998	1.3998	1.3998	NA	1.3998	4	1.3998	1.3998	1.3998	NA	1.3998	3	1.3998	1.3998	NA	1.3998
366	70375	AUS33697	118874	2010	213	2	3	15	W9A10COLE	666	9	58	1	1	IRR	1.4718	g/100g	19/10/2010	LAST	W9A10COLE_IRR	19.5	-17.5	-2.429245283	-3.811320755	COLE	3	1.4718	1.4718	NA	1.4718	1.4718	2	1.4718	NA	1.4718	1.4718	1.4718	1.4718	5	1.4718	1.4718	1.4718	1.4718	NA	1	NA	1.4718	1.4718	1.4718
367	70376	SUN570D	125471	2010	2555	2	3	16	W9A10YANA	3311	38	55	2	3	RFD	1.8145	g/100g	30/10/10 Lucerne	LAST	W9A10YANA_RFD	10.5	15	-2.429245283	-3.811320755	YANA	1	NA	1.8145	1.8145	1.8145	1.8145	5	1.8145	1.8145	1.8145	1.8145	NA	1.8145	5	1.8145	1.8145	1.8145	1.8145	NA	4	1.8145	1.8145	1.8145	NA
368	70377	LPB04_2264	119696	2010	530	2	3	17	W9A10COLE	1488	20	44	1	2	RFD	1.8518	g/100g	12/10/2010	LAST	W9A10COLE_RFD	5.5	-6.5	-2.429245283	-3.811320755	COLE	3	1.8518	1.8518	NA	1.8518	1.8518	4	1.8518	1.8518	1.8518	NA	1.8518	1.8518	1	NA	1.8518	1.8518	1.8518	1.8518	1	NA	1.8518	1.8518	1.8518
369	70378	ELLISON	121380	2010	1104	2	3	18	W9A10COLE	3172	42	56	2	4	IRR	1.491	g/100g	27/10/10 Lucerne	LAST	W9A10COLE_IRR	17.5	15.5	-2.429245283	-3.811320755	COLE	3	1.491	1.491	NA	1.491	1.491	4	1.491	1.491	1.491	NA	1.491	1.491	5	1.491	1.491	1.491	1.491	NA	5	1.491	1.491	1.491	1.491
370	70379	HRZ06_2070	120357	2010	745	2	3	19	W9A10COLE	2149	29	21	2	3	RFD	2.6278	g/100g	27/10/10 Lucerne	LAST	W9A10COLE_RFD	-17.5	2.5	-2.429245283	-3.811320755	COLE	2	2.6278	NA	2.6278	2.6278	2.6278	4	2.6278	2.6278	2.6278	NA	2.6278	2.6278	4	2.6278	2.6278	2.6278	NA	2.6278	3	2.6278	2.6278	NA	2.6278
371	70380	WW19663	125049	2010	2397	2	3	20	W9A10YANA	2889	33	73	2	4	IRR	1.4917	g/100g	30/10/10 Hurricane	LAST	W9A10YANA_IRR	28.5	10	-2.429245283	-3.811320755	YANA	1	NA	1.4917	1.4917	1.4917	1.4917	5	1.4917	1.4917	1.4917	1.4917	NA	1.4917	3	1.4917	1.4917	NA	1.4917	1.4917	2	1.4917	NA	1.4917	1.4917
372	70381	HRZ06_0299	119548	2010	487	2	3	21	W9A10COLE	1340	18	48	1	2	RFD	1.1019	g/100g	19/10/2010	LAST	W9A10COLE_RFD	9.5	-8.5	-2.429245283	-3.811320755	COLE	2	1.1019	NA	1.1019	1.1019	1.1019	5	1.1019	1.1019	1.1019	1.1019	NA	1.1019	5	1.1019	1.1019	1.1019	1.1019	NA	5	1.1019	1.1019	1.1019	1.1019
373	70382	VW3789	121634	2010	1197	2	3	22	W9A10COLE	3426	46	6	2	4	IRR	2.3244	g/100g	27/10/10 Hurricane	LAST	W9A10COLE_IRR	-32.5	19.5	-2.429245283	-3.811320755	COLE	1	NA	2.3244	2.3244	2.3244	2.3244	3	2.3244	2.3244	NA	2.3244	2.3244	2.3244	4	2.3244	2.3244	2.3244	NA	2.3244	2	2.3244	NA	2.3244	2.3244
374	70383	VV2401	120502	2010	785	2	3	23	W9A10COLE	2294	31	14	2	3	RFD	1.7856	g/100g	27/10/10 Lucerne	LAST	W9A10COLE_RFD	-24.5	4.5	-2.429245283	-3.811320755	COLE	2	1.7856	NA	1.7856	1.7856	1.7856	3	1.7856	1.7856	NA	1.7856	1.7856	1.7856	2	1.7856	NA	1.7856	1.7856	1.7856	3	1.7856	1.7856	NA	1.7856
375	70384	VV2856	118501	2010	94	2	3	24	W9A10COLE	293	4	65	1	1	IRR	1.8201	g/100g	19/10/2010	LAST	W9A10COLE_IRR	26.5	-22.5	-2.429245283	-3.811320755	COLE	3	1.8201	1.8201	NA	1.8201	1.8201	5	1.8201	1.8201	1.8201	1.8201	NA	1.8201	1	NA	1.8201	1.8201	1.8201	1.8201	2	1.8201	NA	1.8201	1.8201
376	70385	WW19525	123376	2010	1823	2	3	25	W9A10YANA	1216	14	72	2	4	IRR	1.5088	g/100g	30/10/10 Lucerne	LAST	W9A10YANA_IRR	27.5	-9	-2.429245283	-3.811320755	YANA	1	NA	1.5088	1.5088	1.5088	1.5088	4	1.5088	1.5088	1.5088	NA	1.5088	1.5088	2	1.5088	NA	1.5088	1.5088	1.5088	5	1.5088	1.5088	1.5088	1.5088
377	70386	VENTURA	125918	2010	2704	2	3	26	W9A10YANA	3758	43	62	2	3	RFD	1.9938	g/100g	30/10/10 Lucerne	LAST	W9A10YANA_RFD	17.5	20	-2.429245283	-3.811320755	YANA	1	NA	1.9938	1.9938	1.9938	1.9938	5	1.9938	1.9938	1.9938	1.9938	NA	1.9938	4	1.9938	1.9938	1.9938	NA	1.9938	4	1.9938	1.9938	1.9938	NA
378	70387	VW3595	122057	2010	1350	2	3	27	W9A10COLE	3849	51	49	2	4	IRR	0.98512	g/100g	27/10/10 Lucerne	LAST	W9A10COLE_IRR	10.5	24.5	-2.429245283	-3.811320755	COLE	3	0.98512	0.98512	NA	0.98512	0.98512	5	0.98512	0.98512	0.98512	0.98512	NA	0.98512	4	0.98512	0.98512	0.98512	NA	0.98512	2	0.98512	NA	0.98512	0.98512
379	70388	HRZ06_0055	122413	2010	1482	2	3	28	W9A10YANA	253	3	77	2	4	IRR	2.0698	g/100g	30/10/10 Hurricane	LAST	W9A10YANA_IRR	32.5	-20	-2.429245283	-3.811320755	YANA	2	2.0698	NA	2.0698	2.0698	2.0698	1	NA	2.0698	2.0698	2.0698	2.0698	2.0698	4	2.0698	2.0698	2.0698	NA	2.0698	4	2.0698	2.0698	2.0698	NA
380	70389	VT1155	119546	2010	485	2	3	29	W9A10COLE	1338	18	46	1	2	RFD	1.9455	g/100g	19/10/2010	LAST	W9A10COLE_RFD	7.5	-8.5	-2.429245283	-3.811320755	COLE	2	1.9455	NA	1.9455	1.9455	1.9455	4	1.9455	1.9455	1.9455	NA	1.9455	1.9455	1	NA	1.9455	1.9455	1.9455	1.9455	4	1.9455	1.9455	1.9455	NA
381	70390	VW0404	120718	2010	867	2	3	30	W9A10COLE	2510	34	2	2	3	RFD	1.4519	g/100g	27/10/10 Lucerne	LAST	W9A10COLE_RFD	-36.5	7.5	-2.429245283	-3.811320755	COLE	4	1.4519	1.4519	1.4519	NA	1.4519	4	1.4519	1.4519	1.4519	NA	1.4519	1.4519	3	1.4519	1.4519	NA	1.4519	1.4519	1	NA	1.4519	1.4519	1.4519
382	70391	WW14311	121359	2010	1092	2	4	1	W9A10COLE	3151	42	35	2	4	IRR	1.7246	g/100g	27/10/10 Lucerne	LAST	W9A10COLE_IRR	-3.5	15.5	-1.429245283	-3.811320755	COLE	3	1.7246	1.7246	NA	1.7246	1.7246	3	1.7246	1.7246	NA	1.7246	1.7246	1.7246	4	1.7246	1.7246	1.7246	NA	1.7246	3	1.7246	1.7246	NA	1.7246
383	70392	LPB04_2351	124944	2010	2362	2	4	2	W9A10YANA	2784	32	56	2	3	RFD	1.5839	g/100g	30/10/10 Lucerne	LAST	W9A10YANA_RFD	11.5	9	-1.429245283	-3.811320755	YANA	4	1.5839	1.5839	1.5839	NA	1.5839	2	1.5839	NA	1.5839	1.5839	1.5839	1.5839	3	1.5839	1.5839	NA	1.5839	1.5839	4	1.5839	1.5839	1.5839	NA
384	70393	VT1020	123994	2010	2040	2	4	3	W9A10YANA	1834	21	74	2	4	IRR	1.2947	g/100g	30/10/10 Hurricane	LAST	W9A10YANA_IRR	29.5	-2	-1.429245283	-3.811320755	YANA	4	1.2947	1.2947	1.2947	NA	1.2947	3	1.2947	1.2947	NA	1.2947	1.2947	1.2947	2	1.2947	NA	1.2947	1.2947	1.2947	5	1.2947	1.2947	1.2947	1.2947
385	70394	WW13773	118345	2010	37	2	4	4	W9A10COLE	137	2	61	1	1	IRR	1.5811	g/100g	23/10/10 Lucerne	LAST	W9A10COLE_IRR	22.5	-24.5	-1.429245283	-3.811320755	COLE	1	NA	1.5811	1.5811	1.5811	1.5811	1	NA	1.5811	1.5811	1.5811	1.5811	1.5811	4	1.5811	1.5811	1.5811	NA	1.5811	4	1.5811	1.5811	1.5811	NA
386	70395	WW19410	124084	2010	2077	2	4	5	W9A10YANA	1924	22	76	2	4	IRR	1.6369	g/100g	30/10/10 Lucerne	LAST	W9A10YANA_IRR	31.5	-1	-1.429245283	-3.811320755	YANA	3	1.6369	1.6369	NA	1.6369	1.6369	5	1.6369	1.6369	1.6369	1.6369	NA	1.6369	2	1.6369	NA	1.6369	1.6369	1.6369	1	NA	1.6369	1.6369	1.6369
387	70396	WW19201	122766	2010	1600	2	4	6	W9A10YANA	606	7	78	2	4	IRR	1.4379	g/100g	30/10/10 Hurricane	LAST	W9A10YANA_IRR	33.5	-16	-1.429245283	-3.811320755	YANA	4	1.4379	1.4379	1.4379	NA	1.4379	5	1.4379	1.4379	1.4379	1.4379	NA	1.4379	4	1.4379	1.4379	1.4379	NA	1.4379	4	1.4379	1.4379	1.4379	NA
388	70397	WW14309	123073	2010	1718	2	4	7	W9A10YANA	913	11	33	1	2	RFD	2.3136	g/100g	23/10/10 Hurricane	LAST	W9A10YANA_RFD	-11.5	-12	-1.429245283	-3.811320755	YANA	5	2.3136	2.3136	2.3136	2.3136	NA	4	2.3136	2.3136	2.3136	NA	2.3136	2.3136	3	2.3136	2.3136	NA	2.3136	2.3136	1	NA	2.3136	2.3136	2.3136
389	70398	AUS33585	119728	2010	542	2	4	8	W9A10COLE	1520	20	76	1	2	RFD	1.6913	g/100g	19/10/2010	LAST	W9A10COLE_RFD	37.5	-6.5	-1.429245283	-3.811320755	COLE	3	1.6913	1.6913	NA	1.6913	1.6913	3	1.6913	1.6913	NA	1.6913	1.6913	1.6913	2	1.6913	NA	1.6913	1.6913	1.6913	1	NA	1.6913	1.6913	1.6913
390	70399	WAGT023	121694	2010	1218	2	4	9	W9A10COLE	3486	46	66	2	4	IRR	2.5258	g/100g	27/10/10 Hurricane	LAST	W9A10COLE_IRR	27.5	19.5	-1.429245283	-3.811320755	COLE	5	2.5258	2.5258	2.5258	2.5258	NA	5	2.5258	2.5258	2.5258	2.5258	NA	2.5258	5	2.5258	2.5258	2.5258	2.5258	NA	3	2.5258	2.5258	NA	2.5258
391	70400	WW21843	125888	2010	2696	2	4	10	W9A10YANA	3728	43	32	1	2	RFD	2.2348	g/100g	23/10/10 Hurricane	LAST	W9A10YANA_RFD	-12.5	20	-1.429245283	-3.811320755	YANA	4	2.2348	2.2348	2.2348	NA	2.2348	4	2.2348	2.2348	2.2348	NA	2.2348	2.2348	3	2.2348	2.2348	NA	2.2348	2.2348	1	NA	2.2348	2.2348	2.2348
392	70401	VW1193	121395	2010	1113	2	4	11	W9A10COLE	3187	42	71	2	4	IRR	1.9905	g/100g	27/10/10 Lucerne	LAST	W9A10COLE_IRR	32.5	15.5	-1.429245283	-3.811320755	COLE	4	1.9905	1.9905	1.9905	NA	1.9905	1	NA	1.9905	1.9905	1.9905	1.9905	1.9905	3	1.9905	1.9905	NA	1.9905	1.9905	3	1.9905	1.9905	NA	1.9905
393	70402	WW19660	123369	2010	1820	2	4	12	W9A10YANA	1209	14	65	2	3	RFD	2.4185	g/100g	30/10/10 Lucerne	LAST	W9A10YANA_RFD	20.5	-9	-1.429245283	-3.811320755	YANA	1	NA	2.4185	2.4185	2.4185	2.4185	2	2.4185	NA	2.4185	2.4185	2.4185	2.4185	1	NA	2.4185	2.4185	2.4185	2.4185	2	2.4185	NA	2.4185	2.4185
394	70403	WW13773	121593	2010	1187	2	4	13	W9A10COLE	3385	45	41	2	4	IRR	1.7607	g/100g	27/10/10 Hurricane	LAST	W9A10COLE_IRR	2.5	18.5	-1.429245283	-3.811320755	COLE	1	NA	1.7607	1.7607	1.7607	1.7607	1	NA	1.7607	1.7607	1.7607	1.7607	1.7607	4	1.7607	1.7607	1.7607	NA	1.7607	4	1.7607	1.7607	1.7607	NA
395	70404	WW19365	118963	2010	248	2	4	14	W9A10COLE	755	10	71	1	1	IRR	1.4975	g/100g	19/10/2010	LAST	W9A10COLE_IRR	32.5	-16.5	-1.429245283	-3.811320755	COLE	5	1.4975	1.4975	1.4975	1.4975	NA	4	1.4975	1.4975	1.4975	NA	1.4975	1.4975	1	NA	1.4975	1.4975	1.4975	1.4975	2	1.4975	NA	1.4975	1.4975
396	70405	WW18919	118799	2010	192	2	4	15	W9A10COLE	591	8	59	1	1	IRR	1.5366	g/100g	19/10/2010	LAST	W9A10COLE_IRR	20.5	-18.5	-1.429245283	-3.811320755	COLE	3	1.5366	1.5366	NA	1.5366	1.5366	2	1.5366	NA	1.5366	1.5366	1.5366	1.5366	5	1.5366	1.5366	1.5366	1.5366	NA	4	1.5366	1.5366	1.5366	NA
397	70406	HRZ06_0033	124748	2010	2293	2	4	16	W9A10YANA	2588	30	36	1	2	RFD	1.9713	g/100g	23/10/10 Hurricane	LAST	W9A10YANA_RFD	-8.5	7	-1.429245283	-3.811320755	YANA	2	1.9713	NA	1.9713	1.9713	1.9713	3	1.9713	1.9713	NA	1.9713	1.9713	1.9713	5	1.9713	1.9713	1.9713	1.9713	NA	4	1.9713	1.9713	1.9713	NA
398	70407	VW4355	122267	2010	1429	2	4	17	W9A10YANA	107	2	19	1	1	IRR	1.8693	g/100g	23/10/10 Lucerne	LAST	W9A10YANA_IRR	-25.5	-21	-1.429245283	-3.811320755	YANA	4	1.8693	1.8693	1.8693	NA	1.8693	4	1.8693	1.8693	1.8693	NA	1.8693	1.8693	5	1.8693	1.8693	1.8693	1.8693	NA	1	NA	1.8693	1.8693	1.8693
399	70408	WI25053	122291	2010	1440	2	4	18	W9A10YANA	131	2	43	1	2	RFD	2.2817	g/100g	23/10/10 Hurricane	LAST	W9A10YANA_RFD	-1.5	-21	-1.429245283	-3.811320755	YANA	2	2.2817	NA	2.2817	2.2817	2.2817	1	NA	2.2817	2.2817	2.2817	2.2817	2.2817	5	2.2817	2.2817	2.2817	2.2817	NA	3	2.2817	2.2817	NA	2.2817
400	70409	VW4368	122292	2010	1441	2	4	19	W9A10YANA	132	2	44	1	2	RFD	2.3724	g/100g	23/10/10 Hurricane	LAST	W9A10YANA_RFD	-0.5	-21	-1.429245283	-3.811320755	YANA	4	2.3724	2.3724	2.3724	NA	2.3724	3	2.3724	2.3724	NA	2.3724	2.3724	2.3724	2	2.3724	NA	2.3724	2.3724	2.3724	1	NA	2.3724	2.3724	2.3724
401	70410	VW2426	119237	2010	370	2	4	20	W9A10COLE	1029	14	41	1	2	RFD	1.7384	g/100g	12/10/2010	LAST	W9A10COLE_RFD	2.5	-12.5	-1.429245283	-3.811320755	COLE	4	1.7384	1.7384	1.7384	NA	1.7384	2	1.7384	NA	1.7384	1.7384	1.7384	1.7384	2	1.7384	NA	1.7384	1.7384	1.7384	2	1.7384	NA	1.7384	1.7384
402	70411	QT12844	120311	2010	732	2	4	21	W9A10COLE	2103	28	51	2	3	RFD	2.2517	g/100g	27/10/10 Lucerne	LAST	W9A10COLE_RFD	12.5	1.5	-1.429245283	-3.811320755	COLE	2	2.2517	NA	2.2517	2.2517	2.2517	1	NA	2.2517	2.2517	2.2517	2.2517	2.2517	1	NA	2.2517	2.2517	2.2517	2.2517	4	2.2517	2.2517	2.2517	NA
403	70412	HRZ06_0053	123269	2010	1787	2	4	22	W9A10YANA	1109	13	53	2	3	RFD	2.0035	g/100g	30/10/10 Hurricane	LAST	W9A10YANA_RFD	8.5	-10	-1.429245283	-3.811320755	YANA	4	2.0035	2.0035	2.0035	NA	2.0035	3	2.0035	2.0035	NA	2.0035	2.0035	2.0035	4	2.0035	2.0035	2.0035	NA	2.0035	4	2.0035	2.0035	2.0035	NA
404	70413	EGA_WEDGETAIL	124981	2010	2376	2	4	23	W9A10YANA	2821	33	5	1	1	IRR	0.82902	g/100g	23/10/10 Lucerne	LAST	W9A10YANA_IRR	-39.5	10	-1.429245283	-3.811320755	YANA	5	0.82902	0.82902	0.82902	0.82902	NA	3	0.82902	0.82902	NA	0.82902	0.82902	0.82902	5	0.82902	0.82902	0.82902	0.82902	NA	3	0.82902	0.82902	NA	0.82902
405	70414	WW19660	121598	2010	1189	2	4	24	W9A10COLE	3390	45	46	2	4	IRR	1.1999	g/100g	27/10/10 Hurricane	LAST	W9A10COLE_IRR	7.5	18.5	-1.429245283	-3.811320755	COLE	1	NA	1.1999	1.1999	1.1999	1.1999	2	1.1999	NA	1.1999	1.1999	1.1999	1.1999	1	NA	1.1999	1.1999	1.1999	1.1999	2	1.1999	NA	1.1999	1.1999
406	70415	VV2678	121484	2010	1155	2	4	25	W9A10COLE	3276	44	8	2	4	IRR	1.5047	g/100g	27/10/10 Lucerne	LAST	W9A10COLE_IRR	-30.5	17.5	-1.429245283	-3.811320755	COLE	1	NA	1.5047	1.5047	1.5047	1.5047	2	1.5047	NA	1.5047	1.5047	1.5047	1.5047	3	1.5047	1.5047	NA	1.5047	1.5047	1	NA	1.5047	1.5047	1.5047
407	70416	VW3170	121698	2010	1220	2	4	26	W9A10COLE	3490	46	70	2	4	IRR	1.475	g/100g	27/10/10 Hurricane	LAST	W9A10COLE_IRR	31.5	19.5	-1.429245283	-3.811320755	COLE	5	1.475	1.475	1.475	1.475	NA	1	NA	1.475	1.475	1.475	1.475	1.475	3	1.475	1.475	NA	1.475	1.475	2	1.475	NA	1.475	1.475
408	70417	HRZ03_0076	119470	2010	465	2	4	27	W9A10COLE	1262	17	46	1	2	RFD	1.6624	g/100g	19/10/2010	LAST	W9A10COLE_RFD	7.5	-9.5	-1.429245283	-3.811320755	COLE	5	1.6624	1.6624	1.6624	1.6624	NA	1	NA	1.6624	1.6624	1.6624	1.6624	1.6624	3	1.6624	1.6624	NA	1.6624	1.6624	2	1.6624	NA	1.6624	1.6624
409	70418	HRZ06_0065	122375	2010	1472	2	4	28	W9A10YANA	215	3	39	1	2	RFD	2.2806	g/100g	23/10/10 Lucerne	LAST	W9A10YANA_RFD	-5.5	-20	-1.429245283	-3.811320755	YANA	3	2.2806	2.2806	NA	2.2806	2.2806	4	2.2806	2.2806	2.2806	NA	2.2806	2.2806	4	2.2806	2.2806	2.2806	NA	2.2806	1	NA	2.2806	2.2806	2.2806
410	70420	WW18957	122801	2010	1611	2	4	30	W9A10YANA	641	8	25	1	2	RFD	2.4909	g/100g	23/10/10 Hurricane	LAST	W9A10YANA_RFD	-19.5	-15	-1.429245283	-3.811320755	YANA	5	2.4909	2.4909	2.4909	2.4909	NA	4	2.4909	2.4909	2.4909	NA	2.4909	2.4909	5	2.4909	2.4909	2.4909	2.4909	NA	5	2.4909	2.4909	2.4909	2.4909
411	70421	VW1498	118624	2010	137	2	5	1	W9A10COLE	416	6	36	1	1	IRR	1.6507	g/100g	19/10/2010	LAST	W9A10COLE_IRR	-2.5	-20.5	-0.429245283	-3.811320755	COLE	3	1.6507	1.6507	NA	1.6507	1.6507	1	NA	1.6507	1.6507	1.6507	1.6507	1.6507	5	1.6507	1.6507	1.6507	1.6507	NA	5	1.6507	1.6507	1.6507	1.6507
412	70422	RAC1429	120820	2010	898	2	5	2	W9A10COLE	2612	35	28	2	3	RFD	2.3412	g/100g	27/10/10 Lucerne	LAST	W9A10COLE_RFD	-10.5	8.5	-0.429245283	-3.811320755	COLE	5	2.3412	2.3412	2.3412	2.3412	NA	2	2.3412	NA	2.3412	2.3412	2.3412	2.3412	3	2.3412	2.3412	NA	2.3412	2.3412	4	2.3412	2.3412	2.3412	NA
413	70423	HRZ06_0299	120426	2010	764	2	5	3	W9A10COLE	2218	30	14	2	3	RFD	1.5515	g/100g	27/10/10 Lucerne	LAST	W9A10COLE_RFD	-24.5	3.5	-0.429245283	-3.811320755	COLE	2	1.5515	NA	1.5515	1.5515	1.5515	5	1.5515	1.5515	1.5515	1.5515	NA	1.5515	5	1.5515	1.5515	1.5515	1.5515	NA	5	1.5515	1.5515	1.5515	1.5515
414	70424	VW4192	121266	2010	1062	2	5	4	W9A10COLE	3058	41	18	2	4	IRR	1.4996	g/100g	27/10/10 Lucerne	LAST	W9A10COLE_IRR	-20.5	14.5	-0.429245283	-3.811320755	COLE	2	1.4996	NA	1.4996	1.4996	1.4996	1	NA	1.4996	1.4996	1.4996	1.4996	1.4996	2	1.4996	NA	1.4996	1.4996	1.4996	2	1.4996	NA	1.4996	1.4996
415	70425	QT12844	119576	2010	495	2	5	5	W9A10COLE	1368	18	76	1	2	RFD	2.0388	g/100g	19/10/2010	LAST	W9A10COLE_RFD	37.5	-8.5	-0.429245283	-3.811320755	COLE	2	2.0388	NA	2.0388	2.0388	2.0388	1	NA	2.0388	2.0388	2.0388	2.0388	2.0388	1	NA	2.0388	2.0388	2.0388	2.0388	4	2.0388	2.0388	2.0388	NA
416	70426	VW2373	125269	2010	2480	2	5	6	W9A10YANA	3109	36	29	1	2	RFD	2.1413	g/100g	23/10/10 Hurricane	LAST	W9A10YANA_RFD	-15.5	13	-0.429245283	-3.811320755	YANA	3	2.1413	2.1413	NA	2.1413	2.1413	5	2.1413	2.1413	2.1413	2.1413	NA	2.1413	5	2.1413	2.1413	2.1413	2.1413	NA	5	2.1413	2.1413	2.1413	2.1413
417	70427	QT12667	121544	2010	1174	2	5	7	W9A10COLE	3336	44	68	2	4	IRR	1.5016	g/100g	27/10/10 Lucerne	LAST	W9A10COLE_IRR	29.5	17.5	-0.429245283	-3.811320755	COLE	3	1.5016	1.5016	NA	1.5016	1.5016	2	1.5016	NA	1.5016	1.5016	1.5016	1.5016	1	NA	1.5016	1.5016	1.5016	1.5016	5	1.5016	1.5016	1.5016	1.5016
418	70428	VW3404	125890	2010	2697	2	5	8	W9A10YANA	3730	43	34	1	2	RFD	2.028	g/100g	23/10/10 Hurricane	LAST	W9A10YANA_RFD	-10.5	20	-0.429245283	-3.811320755	YANA	5	2.028	2.028	2.028	2.028	NA	5	2.028	2.028	2.028	2.028	NA	2.028	2	2.028	NA	2.028	2.028	2.028	4	2.028	2.028	2.028	NA
419	70429	EGA_WEDGETAIL	119268	2010	388	2	5	9	W9A10COLE	1060	14	72	1	2	RFD	0.87925	g/100g	12/10/2010	LAST	W9A10COLE_RFD	33.5	-12.5	-0.429245283	-3.811320755	COLE	5	0.87925	0.87925	0.87925	0.87925	NA	3	0.87925	0.87925	NA	0.87925	0.87925	0.87925	5	0.87925	0.87925	0.87925	0.87925	NA	3	0.87925	0.87925	NA	0.87925
420	70430	WW20406	120378	2010	749	2	5	10	W9A10COLE	2170	29	42	2	3	RFD	1.5487	g/100g	27/10/10 Lucerne	LAST	W9A10COLE_RFD	3.5	2.5	-0.429245283	-3.811320755	COLE	3	1.5487	1.5487	NA	1.5487	1.5487	2	1.5487	NA	1.5487	1.5487	1.5487	1.5487	5	1.5487	1.5487	1.5487	1.5487	NA	5	1.5487	1.5487	1.5487	1.5487
421	70431	AUS33585	125130	2010	2432	2	5	11	W9A10YANA	2970	34	66	2	3	RFD	2.3373	g/100g	30/10/10 Lucerne	BACKWARDS	W9A10YANA_RFD	21.5	11	-0.429245283	-3.811320755	YANA	3	2.3373	2.3373	NA	2.3373	2.3373	3	2.3373	2.3373	NA	2.3373	2.3373	2.3373	2	2.3373	NA	2.3373	2.3373	2.3373	1	NA	2.3373	2.3373	2.3373
422	70432	WW21842	119993	2010	633	2	5	12	W9A10COLE	1785	24	37	1	2	RFD	1.8768	g/100g	19/10/2010	LAST	W9A10COLE_RFD	-1.5	-2.5	-0.429245283	-3.811320755	COLE	1	NA	1.8768	1.8768	1.8768	1.8768	3	1.8768	1.8768	NA	1.8768	1.8768	1.8768	5	1.8768	1.8768	1.8768	1.8768	NA	3	1.8768	1.8768	NA	1.8768
423	70433	VT1155	122339	2010	1455	2	5	13	W9A10YANA	179	3	3	1	1	IRR	1.6755	g/100g	23/10/10 Lucerne	LAST	W9A10YANA_IRR	-41.5	-20	-0.429245283	-3.811320755	YANA	2	1.6755	NA	1.6755	1.6755	1.6755	4	1.6755	1.6755	1.6755	NA	1.6755	1.6755	1	NA	1.6755	1.6755	1.6755	1.6755	4	1.6755	1.6755	1.6755	NA
424	70434	ELLISON	124044	2010	2059	2	5	14	W9A10YANA	1884	22	36	1	2	RFD	2.265	g/100g	23/10/10 Hurricane	LAST	W9A10YANA_RFD	-8.5	-1	-0.429245283	-3.811320755	YANA	3	2.265	2.265	NA	2.265	2.265	4	2.265	2.265	2.265	NA	2.265	2.265	5	2.265	2.265	2.265	2.265	NA	5	2.265	2.265	2.265	2.265
425	70435	WW19754	125020	2010	2390	2	5	15	W9A10YANA	2860	33	44	1	2	RFD	1.9851	g/100g	23/10/10 Hurricane	LAST	W9A10YANA_RFD	-0.5	10	-0.429245283	-3.811320755	YANA	1	NA	1.9851	1.9851	1.9851	1.9851	5	1.9851	1.9851	1.9851	1.9851	NA	1.9851	2	1.9851	NA	1.9851	1.9851	1.9851	1	NA	1.9851	1.9851	1.9851
426	70436	JANZ	123773	2010	1961	2	5	16	W9A10YANA	1613	19	29	1	2	RFD	2.2534	g/100g	23/10/10 Hurricane	LAST	W9A10YANA_RFD	-15.5	-4	-0.429245283	-3.811320755	YANA	3	2.2534	2.2534	NA	2.2534	2.2534	3	2.2534	2.2534	NA	2.2534	2.2534	2.2534	5	2.2534	2.2534	2.2534	2.2534	NA	1	NA	2.2534	2.2534	2.2534
427	70437	WW19473	125917	2010	2703	2	5	17	W9A10YANA	3757	43	61	2	3	RFD	1.5358	g/100g	30/10/10 Lucerne	LAST	W9A10YANA_RFD	16.5	20	-0.429245283	-3.811320755	YANA	4	1.5358	1.5358	1.5358	NA	1.5358	4	1.5358	1.5358	1.5358	NA	1.5358	1.5358	1	NA	1.5358	1.5358	1.5358	1.5358	5	1.5358	1.5358	1.5358	1.5358
428	70438	WI25099	119359	2010	428	2	5	18	W9A10COLE	1151	16	11	1	2	RFD	1.8965	g/100g	19/10/2010	LAST	W9A10COLE_RFD	-27.5	-10.5	-0.429245283	-3.811320755	COLE	2	1.8965	NA	1.8965	1.8965	1.8965	1	NA	1.8965	1.8965	1.8965	1.8965	1.8965	2	1.8965	NA	1.8965	1.8965	1.8965	1	NA	1.8965	1.8965	1.8965
429	70439	VW1193	123713	2010	1943	2	5	19	W9A10YANA	1553	18	57	2	3	RFD	1.6581	g/100g	30/10/10 Hurricane	LAST	W9A10YANA_RFD	12.5	-5	-0.429245283	-3.811320755	YANA	4	1.6581	1.6581	1.6581	NA	1.6581	1	NA	1.6581	1.6581	1.6581	1.6581	1.6581	3	1.6581	1.6581	NA	1.6581	1.6581	3	1.6581	1.6581	NA	1.6581
430	70440	GBA0608	121995	2010	1328	2	5	20	W9A10COLE	3787	50	63	2	4	IRR	1.0531	g/100g	27/10/10 Lucerne	LAST	W9A10COLE_IRR	24.5	23.5	-0.429245283	-3.811320755	COLE	1	NA	1.0531	1.0531	1.0531	1.0531	3	1.0531	1.0531	NA	1.0531	1.0531	1.0531	2	1.0531	NA	1.0531	1.0531	1.0531	3	1.0531	1.0531	NA	1.0531
431	70441	VU3750	122237	2010	1417	2	5	21	W9A10YANA	77	1	77	2	4	IRR	1.8807	g/100g	30/10/10 Hurricane	LAST	W9A10YANA_IRR	32.5	-22	-0.429245283	-3.811320755	YANA	2	1.8807	NA	1.8807	1.8807	1.8807	1	NA	1.8807	1.8807	1.8807	1.8807	1.8807	2	1.8807	NA	1.8807	1.8807	1.8807	4	1.8807	1.8807	1.8807	NA
432	70442	YENDA	123915	2010	2012	2	5	22	W9A10YANA	1755	20	83	2	4	IRR	1.1931	g/100g	30/10/10 Hurricane	LAST	W9A10YANA_IRR	38.5	-3	-0.429245283	-3.811320755	YANA	5	1.1931	1.1931	1.1931	1.1931	NA	4	1.1931	1.1931	1.1931	NA	1.1931	1.1931	2	1.1931	NA	1.1931	1.1931	1.1931	1	NA	1.1931	1.1931	1.1931
433	70443	RAC1451	121279	2010	1069	2	5	23	W9A10COLE	3071	41	31	2	4	IRR	1.9335	g/100g	27/10/10 Lucerne	LAST	W9A10COLE_IRR	-7.5	14.5	-0.429245283	-3.811320755	COLE	1	NA	1.9335	1.9335	1.9335	1.9335	3	1.9335	1.9335	NA	1.9335	1.9335	1.9335	4	1.9335	1.9335	1.9335	NA	1.9335	1	NA	1.9335	1.9335	1.9335
434	70444	QT12667	118614	2010	135	2	5	24	W9A10COLE	406	6	26	1	1	IRR	1.475	g/100g	19/10/2010	LAST	W9A10COLE_IRR	-12.5	-20.5	-0.429245283	-3.811320755	COLE	3	1.475	1.475	NA	1.475	1.475	2	1.475	NA	1.475	1.475	1.475	1.475	1	NA	1.475	1.475	1.475	1.475	5	1.475	1.475	1.475	1.475
435	70445	VW3404	123392	2010	1829	2	5	25	W9A10YANA	1232	14	88	2	4	IRR	1.5744	g/100g	30/10/10 Hurricane	LAST	W9A10YANA_IRR	43.5	-9	-0.429245283	-3.811320755	YANA	5	1.5744	1.5744	1.5744	1.5744	NA	5	1.5744	1.5744	1.5744	1.5744	NA	1.5744	2	1.5744	NA	1.5744	1.5744	1.5744	4	1.5744	1.5744	1.5744	NA
436	70446	WW18805	118351	2010	39	2	5	26	W9A10COLE	143	2	67	1	1	IRR	0.98751	g/100g	19/10/2010	LAST	W9A10COLE_IRR	28.5	-24.5	-0.429245283	-3.811320755	COLE	3	0.98751	0.98751	NA	0.98751	0.98751	3	0.98751	0.98751	NA	0.98751	0.98751	0.98751	2	0.98751	NA	0.98751	0.98751	0.98751	4	0.98751	0.98751	0.98751	NA
437	70447	DIAMONDBIRD	123220	2010	1775	2	5	27	W9A10YANA	1060	13	4	1	1	IRR	1.638	g/100g	23/10/10 Lucerne	LAST	W9A10YANA_IRR	-40.5	-10	-0.429245283	-3.811320755	YANA	4	1.638	1.638	1.638	NA	1.638	1	NA	1.638	1.638	1.638	1.638	1.638	2	1.638	NA	1.638	1.638	1.638	4	1.638	1.638	1.638	NA
438	70448	8890_213	123164	2010	1751	2	5	28	W9A10YANA	1004	12	36	1	2	RFD	1.7361	g/100g	23/10/10 Hurricane	LAST	W9A10YANA_RFD	-8.5	-11	-0.429245283	-3.811320755	YANA	3	1.7361	1.7361	NA	1.7361	1.7361	3	1.7361	1.7361	NA	1.7361	1.7361	1.7361	5	1.7361	1.7361	1.7361	1.7361	NA	1	NA	1.7361	1.7361	1.7361
439	70449	WW19525	119760	2010	553	2	5	29	W9A10COLE	1552	21	32	1	2	RFD	2.2834	g/100g	12/10/2010	LAST	W9A10COLE_RFD	-6.5	-5.5	-0.429245283	-3.811320755	COLE	1	NA	2.2834	2.2834	2.2834	2.2834	4	2.2834	2.2834	2.2834	NA	2.2834	2.2834	2	2.2834	NA	2.2834	2.2834	2.2834	5	2.2834	2.2834	2.2834	2.2834
440	70450	HRZ05_0101	125784	2010	2655	2	5	30	W9A10YANA	3624	42	16	1	1	IRR	2.6761	g/100g	23/10/10 Lucerne	LAST	W9A10YANA_IRR	-28.5	19	-0.429245283	-3.811320755	YANA	3	2.6761	2.6761	NA	2.6761	2.6761	5	2.6761	2.6761	2.6761	2.6761	NA	2.6761	3	2.6761	2.6761	NA	2.6761	2.6761	2	2.6761	NA	2.6761	2.6761
441	70451	ROSELLA	122293	2010	1442	2	6	1	W9A10YANA	133	2	45	2	3	RFD	1.1775	g/100g	30/10/10 Lucerne	LAST	W9A10YANA_RFD	0.5	-21	0.570754717	-3.811320755	YANA	4	1.1775	1.1775	1.1775	NA	1.1775	5	1.1775	1.1775	1.1775	1.1775	NA	1.1775	1	NA	1.1775	1.1775	1.1775	1.1775	3	1.1775	1.1775	NA	1.1775
442	70452	ELLISON	120879	2010	917	2	6	2	W9A10COLE	2671	36	11	2	3	RFD	1.867	g/100g	27/10/10 Lucerne	LAST	W9A10COLE_RFD	-27.5	9.5	0.570754717	-3.811320755	COLE	3	1.867	1.867	NA	1.867	1.867	4	1.867	1.867	1.867	NA	1.867	1.867	5	1.867	1.867	1.867	1.867	NA	5	1.867	1.867	1.867	1.867
443	70453	WW21162	120034	2010	646	2	6	3	W9A10COLE	1826	25	2	1	2	RFD	1.8191	g/100g	12/10/2010	LAST	W9A10COLE_RFD	-36.5	-1.5	0.570754717	-3.811320755	COLE	4	1.8191	1.8191	1.8191	NA	1.8191	1	NA	1.8191	1.8191	1.8191	1.8191	1.8191	3	1.8191	1.8191	NA	1.8191	1.8191	2	1.8191	NA	1.8191	1.8191
444	70454	VW2426	123453	2010	1851	2	6	4	W9A10YANA	1293	15	61	2	3	RFD	1.8513	g/100g	30/10/10 Hurricane	LAST	W9A10YANA_RFD	16.5	-8	0.570754717	-3.811320755	YANA	4	1.8513	1.8513	1.8513	NA	1.8513	2	1.8513	NA	1.8513	1.8513	1.8513	1.8513	2	1.8513	NA	1.8513	1.8513	1.8513	2	1.8513	NA	1.8513	1.8513
445	70455	VW2067	124502	2010	2220	2	6	5	W9A10YANA	2342	27	54	2	3	RFD	1.3926	g/100g	30/10/10 Lucerne	LAST	W9A10YANA_RFD	9.5	4	0.570754717	-3.811320755	YANA	5	1.3926	1.3926	1.3926	1.3926	NA	1	NA	1.3926	1.3926	1.3926	1.3926	1.3926	1	NA	1.3926	1.3926	1.3926	1.3926	4	1.3926	1.3926	1.3926	NA
446	70456	HRZ05_0137	123885	2010	1999	2	6	6	W9A10YANA	1725	20	53	2	3	RFD	1.7769	g/100g	30/10/10 Lucerne	LAST	W9A10YANA_RFD	8.5	-3	0.570754717	-3.811320755	YANA	1	NA	1.7769	1.7769	1.7769	1.7769	5	1.7769	1.7769	1.7769	1.7769	NA	1.7769	3	1.7769	1.7769	NA	1.7769	1.7769	2	1.7769	NA	1.7769	1.7769
447	70457	WW19733	120901	2010	929	2	6	7	W9A10COLE	2693	36	33	2	3	RFD	1.2729	g/100g	27/10/10 Lucerne	LAST	W9A10COLE_RFD	-5.5	9.5	0.570754717	-3.811320755	COLE	5	1.2729	1.2729	1.2729	1.2729	NA	1	NA	1.2729	1.2729	1.2729	1.2729	1.2729	1	NA	1.2729	1.2729	1.2729	1.2729	4	1.2729	1.2729	1.2729	NA
448	70458	RAC1374	121651	2010	1205	2	6	8	W9A10COLE	3443	46	23	2	4	IRR	1.8071	g/100g	27/10/10 Hurricane	LAST	W9A10COLE_IRR	-15.5	19.5	0.570754717	-3.811320755	COLE	1	NA	1.8071	1.8071	1.8071	1.8071	1	NA	1.8071	1.8071	1.8071	1.8071	1.8071	5	1.8071	1.8071	1.8071	1.8071	NA	2	1.8071	NA	1.8071	1.8071
449	70459	HRZ04_0321	123106	2010	1726	2	6	9	W9A10YANA	946	11	66	2	3	RFD	1.8658	g/100g	30/10/10 Hurricane	LAST	W9A10YANA_RFD	21.5	-12	0.570754717	-3.811320755	YANA	4	1.8658	1.8658	1.8658	NA	1.8658	2	1.8658	NA	1.8658	1.8658	1.8658	1.8658	3	1.8658	1.8658	NA	1.8658	1.8658	1	NA	1.8658	1.8658	1.8658
450	70460	WW20192	123113	2010	1730	2	6	10	W9A10YANA	953	11	73	2	4	IRR	1.9725	g/100g	30/10/10 Hurricane	LAST	W9A10YANA_IRR	28.5	-12	0.570754717	-3.811320755	YANA	5	1.9725	1.9725	1.9725	1.9725	NA	5	1.9725	1.9725	1.9725	1.9725	NA	1.9725	1	NA	1.9725	1.9725	1.9725	1.9725	4	1.9725	1.9725	1.9725	NA
451	70461	WW19492	118802	2010	195	2	6	11	W9A10COLE	594	8	62	1	1	IRR	1.559	g/100g	19/10/2010	LAST	W9A10COLE_IRR	23.5	-18.5	0.570754717	-3.811320755	COLE	2	1.559	NA	1.559	1.559	1.559	1	NA	1.559	1.559	1.559	1.559	1.559	5	1.559	1.559	1.559	1.559	NA	3	1.559	1.559	NA	1.559
452	70462	VW3707	125297	2010	2493	2	6	12	W9A10YANA	3137	36	57	2	3	RFD	1.6524	g/100g	30/10/10 Lucerne	LAST	W9A10YANA_RFD	12.5	13	0.570754717	-3.811320755	YANA	3	1.6524	1.6524	NA	1.6524	1.6524	1	NA	1.6524	1.6524	1.6524	1.6524	1.6524	3	1.6524	1.6524	NA	1.6524	1.6524	5	1.6524	1.6524	1.6524	1.6524
453	70463	VW0241	124960	2010	2370	2	6	13	W9A10YANA	2800	32	72	2	4	IRR	1.4775	g/100g	30/10/10 Hurricane	LAST	W9A10YANA_IRR	27.5	9	0.570754717	-3.811320755	YANA	4	1.4775	1.4775	1.4775	NA	1.4775	5	1.4775	1.4775	1.4775	1.4775	NA	1.4775	3	1.4775	1.4775	NA	1.4775	1.4775	2	1.4775	NA	1.4775	1.4775
454	70464	VV2678	118341	2010	36	2	6	14	W9A10COLE	133	2	57	1	1	IRR	1.166	g/100g	12/10/2010	LAST	W9A10COLE_IRR	18.5	-24.5	0.570754717	-3.811320755	COLE	1	NA	1.166	1.166	1.166	1.166	2	1.166	NA	1.166	1.166	1.166	1.166	3	1.166	1.166	NA	1.166	1.166	1	NA	1.166	1.166	1.166
455	70465	VW0373	118750	2010	170	2	6	15	W9A10COLE	542	8	10	1	1	IRR	1.9927	g/100g	12/10/2010	LAST	W9A10COLE_IRR	-28.5	-18.5	0.570754717	-3.811320755	COLE	4	1.9927	1.9927	1.9927	NA	1.9927	1	NA	1.9927	1.9927	1.9927	1.9927	1.9927	2	1.9927	NA	1.9927	1.9927	1.9927	2	1.9927	NA	1.9927	1.9927
456	70466	WW20664	119882	2010	587	2	6	16	W9A10COLE	1674	23	2	1	2	RFD	2.2125	g/100g	12/10/2010	LAST	W9A10COLE_RFD	-36.5	-3.5	0.570754717	-3.811320755	COLE	3	2.2125	2.2125	NA	2.2125	2.2125	3	2.2125	2.2125	NA	2.2125	2.2125	2.2125	2	2.2125	NA	2.2125	2.2125	2.2125	4	2.2125	2.2125	2.2125	NA
457	70467	VW3595	122633	2010	1558	2	6	17	W9A10YANA	473	6	33	1	2	RFD	1.823	g/100g	23/10/10 Lucerne	LAST	W9A10YANA_RFD	-11.5	-17	0.570754717	-3.811320755	YANA	3	1.823	1.823	NA	1.823	1.823	5	1.823	1.823	1.823	1.823	NA	1.823	4	1.823	1.823	1.823	NA	1.823	2	1.823	NA	1.823	1.823
458	70468	HRZ06_0067	119373	2010	434	2	6	18	W9A10COLE	1165	16	25	1	2	RFD	1.5268	g/100g	12/10/2010	LAST	W9A10COLE_RFD	-13.5	-10.5	0.570754717	-3.811320755	COLE	1	NA	1.5268	1.5268	1.5268	1.5268	3	1.5268	1.5268	NA	1.5268	1.5268	1.5268	1	NA	1.5268	1.5268	1.5268	1.5268	4	1.5268	1.5268	1.5268	NA
459	70469	HRZ06_2082	123635	2010	1913	2	6	19	W9A10YANA	1475	17	67	2	4	IRR	1.3682	g/100g	30/10/10 Hurricane	LAST	W9A10YANA_IRR	22.5	-6	0.570754717	-3.811320755	YANA	4	1.3682	1.3682	1.3682	NA	1.3682	1	NA	1.3682	1.3682	1.3682	1.3682	1.3682	4	1.3682	1.3682	1.3682	NA	1.3682	4	1.3682	1.3682	1.3682	NA
460	70470	WI25053	121963	2010	1318	2	6	20	W9A10COLE	3755	50	31	2	4	IRR	2.3996	g/100g	27/10/10 Lucerne	LAST	W9A10COLE_IRR	-7.5	23.5	0.570754717	-3.811320755	COLE	2	2.3996	NA	2.3996	2.3996	2.3996	1	NA	2.3996	2.3996	2.3996	2.3996	2.3996	5	2.3996	2.3996	2.3996	2.3996	NA	3	2.3996	2.3996	NA	2.3996
461	70471	VW3717	118273	2010	19	2	6	21	W9A10COLE	65	1	65	1	1	IRR	1.4669	g/100g	19/10/2010	LAST	W9A10COLE_IRR	26.5	-25.5	0.570754717	-3.811320755	COLE	1	NA	1.4669	1.4669	1.4669	1.4669	4	1.4669	1.4669	1.4669	NA	1.4669	1.4669	5	1.4669	1.4669	1.4669	1.4669	NA	5	1.4669	1.4669	1.4669	1.4669
462	70472	AXE	123499	2010	1865	2	6	22	W9A10YANA	1339	16	19	1	1	IRR	2.3996	g/100g	23/10/10 Lucerne	LAST	W9A10YANA_IRR	-25.5	-7	0.570754717	-3.811320755	YANA	2	2.3996	NA	2.3996	2.3996	2.3996	4	2.3996	2.3996	2.3996	NA	2.3996	2.3996	1	NA	2.3996	2.3996	2.3996	2.3996	5	2.3996	2.3996	2.3996	2.3996
463	70473	HRZ06_0033	121468	2010	1147	2	6	23	W9A10COLE	3260	43	68	2	4	IRR	2.0674	g/100g	27/10/10 Lucerne	LAST	W9A10COLE_IRR	29.5	16.5	0.570754717	-3.811320755	COLE	2	2.0674	NA	2.0674	2.0674	2.0674	3	2.0674	2.0674	NA	2.0674	2.0674	2.0674	5	2.0674	2.0674	2.0674	2.0674	NA	4	2.0674	2.0674	2.0674	NA
464	70474	LPB04_2351	120644	2010	837	2	6	24	W9A10COLE	2436	33	4	2	3	RFD	2.0489	g/100g	27/10/10 Lucerne	LAST	W9A10COLE_RFD	-34.5	6.5	0.570754717	-3.811320755	COLE	4	2.0489	2.0489	2.0489	NA	2.0489	2	2.0489	NA	2.0489	2.0489	2.0489	2.0489	3	2.0489	2.0489	NA	2.0489	2.0489	4	2.0489	2.0489	2.0489	NA
465	70475	WW20469	121991	2010	1325	2	6	25	W9A10COLE	3783	50	59	2	4	IRR	1.272	g/100g	27/10/10 Lucerne	LAST	W9A10COLE_IRR	20.5	23.5	0.570754717	-3.811320755	COLE	4	1.272	1.272	1.272	NA	1.272	4	1.272	1.272	1.272	NA	1.272	1.272	2	1.272	NA	1.272	1.272	1.272	2	1.272	NA	1.272	1.272
466	70476	VW3466	125548	2010	2577	2	6	26	W9A10YANA	3388	39	44	1	2	RFD	2.2305	g/100g	23/10/10 Hurricane	LAST	W9A10YANA_RFD	-0.5	16	0.570754717	-3.811320755	YANA	1	NA	2.2305	2.2305	2.2305	2.2305	3	2.2305	2.2305	NA	2.2305	2.2305	2.2305	4	2.2305	2.2305	2.2305	NA	2.2305	3	2.2305	2.2305	NA	2.2305
467	70477	WW21859	122343	2010	1456	2	6	27	W9A10YANA	183	3	7	1	1	IRR	1.9158	g/100g	23/10/10 Hurricane	LAST	W9A10YANA_IRR	-37.5	-20	0.570754717	-3.811320755	YANA	5	1.9158	1.9158	1.9158	1.9158	NA	5	1.9158	1.9158	1.9158	1.9158	NA	1.9158	4	1.9158	1.9158	1.9158	NA	1.9158	5	1.9158	1.9158	1.9158	1.9158
468	70478	VW2843	118867	2010	208	2	6	28	W9A10COLE	659	9	51	1	1	IRR	1.7453	g/100g	12/10/2010	LAST	W9A10COLE_IRR	12.5	-17.5	0.570754717	-3.811320755	COLE	4	1.7453	1.7453	1.7453	NA	1.7453	5	1.7453	1.7453	1.7453	1.7453	NA	1.7453	4	1.7453	1.7453	1.7453	NA	1.7453	5	1.7453	1.7453	1.7453	1.7453
469	70479	WW14396	123153	2010	1744	2	6	29	W9A10YANA	993	12	25	1	2	RFD	2.3598	g/100g	23/10/10 Hurricane	LAST	W9A10YANA_RFD	-19.5	-11	0.570754717	-3.811320755	YANA	5	2.3598	2.3598	2.3598	2.3598	NA	5	2.3598	2.3598	2.3598	2.3598	NA	2.3598	2	2.3598	NA	2.3598	2.3598	2.3598	2	2.3598	NA	2.3598	2.3598
470	70480	VV2321	120920	2010	939	2	6	30	W9A10COLE	2712	36	52	2	3	RFD	1.8745	g/100g	27/10/10 Lucerne	LAST	W9A10COLE_RFD	13.5	9.5	0.570754717	-3.811320755	COLE	1	NA	1.8745	1.8745	1.8745	1.8745	4	1.8745	1.8745	1.8745	NA	1.8745	1.8745	1	NA	1.8745	1.8745	1.8745	1.8745	5	1.8745	1.8745	1.8745	1.8745
471	70481	WW16917	122781	2010	1604	2	7	1	W9A10YANA	621	8	5	1	1	IRR	1.9087	g/100g	23/10/10 Lucerne	LAST	W9A10YANA_IRR	-39.5	-15	1.570754717	-3.811320755	YANA	5	1.9087	1.9087	1.9087	1.9087	NA	3	1.9087	1.9087	NA	1.9087	1.9087	1.9087	3	1.9087	1.9087	NA	1.9087	1.9087	2	1.9087	NA	1.9087	1.9087
472	70482	WW20096	124177	2010	2106	2	7	2	W9A10YANA	2017	23	81	2	4	IRR	1.4632	g/100g	30/10/10 Lucerne	LAST	W9A10YANA_IRR	36.5	0	1.570754717	-3.811320755	YANA	2	1.4632	NA	1.4632	1.4632	1.4632	2	1.4632	NA	1.4632	1.4632	1.4632	1.4632	1	NA	1.4632	1.4632	1.4632	1.4632	1	NA	1.4632	1.4632	1.4632
473	70483	RAC1451	125401	2010	2527	2	7	3	W9A10YANA	3241	37	73	2	4	IRR	1.2887	g/100g	30/10/10 Hurricane	LAST	W9A10YANA_IRR	28.5	14	1.570754717	-3.811320755	YANA	1	NA	1.2887	1.2887	1.2887	1.2887	3	1.2887	1.2887	NA	1.2887	1.2887	1.2887	4	1.2887	1.2887	1.2887	NA	1.2887	1	NA	1.2887	1.2887	1.2887
474	70484	RAC1393	120630	2010	831	2	7	4	W9A10COLE	2422	32	66	2	3	RFD	1.9457	g/100g	27/10/10 Lucerne	LAST	W9A10COLE_RFD	27.5	5.5	1.570754717	-3.811320755	COLE	3	1.9457	1.9457	NA	1.9457	1.9457	4	1.9457	1.9457	1.9457	NA	1.9457	1.9457	1	NA	1.9457	1.9457	1.9457	1.9457	5	1.9457	1.9457	1.9457	1.9457
475	70485	WW19743	120052	2010	654	2	7	5	W9A10COLE	1844	25	20	1	2	RFD	2.0791	g/100g	19/10/2010	LAST	W9A10COLE_RFD	-18.5	-1.5	1.570754717	-3.811320755	COLE	5	2.0791	2.0791	2.0791	2.0791	NA	3	2.0791	2.0791	NA	2.0791	2.0791	2.0791	2	2.0791	NA	2.0791	2.0791	2.0791	3	2.0791	2.0791	NA	2.0791
476	70486	VW4192	125926	2010	2707	2	7	6	W9A10YANA	3766	43	70	2	4	IRR	1.3809	g/100g	30/10/10 Hurricane	LAST	W9A10YANA_IRR	25.5	20	1.570754717	-3.811320755	YANA	2	1.3809	NA	1.3809	1.3809	1.3809	1	NA	1.3809	1.3809	1.3809	1.3809	1.3809	2	1.3809	NA	1.3809	1.3809	1.3809	2	1.3809	NA	1.3809	1.3809
477	70487	65211_176	118515	2010	100	2	7	7	W9A10COLE	307	5	3	1	1	IRR	2.5519	g/100g	12/10/2010	LAST	W9A10COLE_IRR	-35.5	-21.5	1.570754717	-3.811320755	COLE	2	2.5519	NA	2.5519	2.5519	2.5519	3	2.5519	2.5519	NA	2.5519	2.5519	2.5519	5	2.5519	2.5519	2.5519	2.5519	NA	3	2.5519	2.5519	NA	2.5519
478	70488	65211_176	122078	2010	1359	2	7	8	W9A10COLE	3870	51	70	2	4	IRR	2.0278	g/100g	27/10/10 Lucerne	LAST	W9A10COLE_IRR	31.5	24.5	1.570754717	-3.811320755	COLE	2	2.0278	NA	2.0278	2.0278	2.0278	3	2.0278	2.0278	NA	2.0278	2.0278	2.0278	5	2.0278	2.0278	2.0278	2.0278	NA	3	2.0278	2.0278	NA	2.0278
479	70489	WW18049	120824	2010	901	2	7	9	W9A10COLE	2616	35	32	2	3	RFD	1.4831	g/100g	27/10/10 Lucerne	LAST	W9A10COLE_RFD	-6.5	8.5	1.570754717	-3.811320755	COLE	4	1.4831	1.4831	1.4831	NA	1.4831	1	NA	1.4831	1.4831	1.4831	1.4831	1.4831	5	1.4831	1.4831	1.4831	1.4831	NA	1	NA	1.4831	1.4831	1.4831
480	70490	WW18830	121880	2010	1288	2	7	10	W9A10COLE	3672	49	24	2	4	IRR	1.6714	g/100g	27/10/10 Hurricane	LAST	W9A10COLE_IRR	-14.5	22.5	1.570754717	-3.811320755	COLE	5	1.6714	1.6714	1.6714	1.6714	NA	2	1.6714	NA	1.6714	1.6714	1.6714	1.6714	4	1.6714	1.6714	1.6714	NA	1.6714	5	1.6714	1.6714	1.6714	1.6714
481	70491	VT1155	118767	2010	178	2	7	11	W9A10COLE	559	8	27	1	1	IRR	1.1769	g/100g	19/10/2010	LAST	W9A10COLE_IRR	-11.5	-18.5	1.570754717	-3.811320755	COLE	2	1.1769	NA	1.1769	1.1769	1.1769	4	1.1769	1.1769	1.1769	NA	1.1769	1.1769	1	NA	1.1769	1.1769	1.1769	1.1769	4	1.1769	1.1769	1.1769	NA
482	70492	HRZ04_0515	119161	2010	333	2	7	12	W9A10COLE	953	13	41	1	1	IRR	1.4244	g/100g	12/10/2010	LAST	W9A10COLE_IRR	2.5	-13.5	1.570754717	-3.811320755	COLE	5	1.4244	1.4244	1.4244	1.4244	NA	3	1.4244	1.4244	NA	1.4244	1.4244	1.4244	5	1.4244	1.4244	1.4244	1.4244	NA	5	1.4244	1.4244	1.4244	1.4244
483	70493	VW3473	119073	2010	289	2	7	13	W9A10COLE	865	12	29	1	1	IRR	1.643	g/100g	19/10/2010	LAST	W9A10COLE_IRR	-9.5	-14.5	1.570754717	-3.811320755	COLE	1	NA	1.643	1.643	1.643	1.643	5	1.643	1.643	1.643	1.643	NA	1.643	2	1.643	NA	1.643	1.643	1.643	2	1.643	NA	1.643	1.643
484	70494	VQ2791	122447	2010	1493	2	7	14	W9A10YANA	287	4	23	1	2	RFD	2.078	g/100g	23/10/10 Lucerne	LAST	W9A10YANA_RFD	-21.5	-19	1.570754717	-3.811320755	YANA	3	2.078	2.078	NA	2.078	2.078	4	2.078	2.078	2.078	NA	2.078	2.078	4	2.078	2.078	2.078	NA	2.078	4	2.078	2.078	2.078	NA
485	70495	WW19754	122309	2010	1445	2	7	15	W9A10YANA	149	2	61	2	3	RFD	1.8657	g/100g	30/10/10 Lucerne	LAST	W9A10YANA_RFD	16.5	-21	1.570754717	-3.811320755	YANA	1	NA	1.8657	1.8657	1.8657	1.8657	5	1.8657	1.8657	1.8657	1.8657	NA	1.8657	2	1.8657	NA	1.8657	1.8657	1.8657	1	NA	1.8657	1.8657	1.8657
486	70496	HRZ06_0319	120025	2010	642	2	7	16	W9A10COLE	1817	24	69	1	2	RFD	1.1474	g/100g	19/10/2010	LAST	W9A10COLE_RFD	30.5	-2.5	1.570754717	-3.811320755	COLE	2	1.1474	NA	1.1474	1.1474	1.1474	4	1.1474	1.1474	1.1474	NA	1.1474	1.1474	3	1.1474	1.1474	NA	1.1474	1.1474	3	1.1474	1.1474	NA	1.1474
487	70497	HRZ03_0062	118794	2010	189	2	7	17	W9A10COLE	586	8	54	1	1	IRR	0.81404	g/100g	19/10/2010	LAST	W9A10COLE_IRR	15.5	-18.5	1.570754717	-3.811320755	COLE	3	0.81404	0.81404	NA	0.81404	0.81404	2	0.81404	NA	0.81404	0.81404	0.81404	0.81404	3	0.81404	0.81404	NA	0.81404	0.81404	3	0.81404	0.81404	NA	0.81404
488	70498	VW3405	119644	2010	516	2	7	18	W9A10COLE	1436	19	68	1	2	RFD	1.1053	g/100g	12/10/2010	LAST	W9A10COLE_RFD	29.5	-7.5	1.570754717	-3.811320755	COLE	3	1.1053	1.1053	NA	1.1053	1.1053	3	1.1053	1.1053	NA	1.1053	1.1053	1.1053	1	NA	1.1053	1.1053	1.1053	1.1053	5	1.1053	1.1053	1.1053	1.1053
489	70499	WW19663	120137	2010	683	2	7	19	W9A10COLE	1929	26	29	1	2	RFD	1.3911	g/100g	12/10/2010	LAST	W9A10COLE_RFD	-9.5	-0.5	1.570754717	-3.811320755	COLE	1	NA	1.3911	1.3911	1.3911	1.3911	5	1.3911	1.3911	1.3911	1.3911	NA	1.3911	3	1.3911	1.3911	NA	1.3911	1.3911	2	1.3911	NA	1.3911	1.3911
490	70500	HRZ04_0188	119718	2010	538	2	7	20	W9A10COLE	1510	20	66	1	2	RFD	1.2658	g/100g	19/10/2010	LAST	W9A10COLE_RFD	27.5	-6.5	1.570754717	-3.811320755	COLE	5	1.2658	1.2658	1.2658	1.2658	NA	2	1.2658	NA	1.2658	1.2658	1.2658	1.2658	2	1.2658	NA	1.2658	1.2658	1.2658	3	1.2658	1.2658	NA	1.2658
491	70501	VW0385	123580	2010	1897	2	7	21	W9A10YANA	1420	17	12	1	1	IRR	1.7525	g/100g	23/10/10 Hurricane	LAST	W9A10YANA_IRR	-32.5	-6	1.570754717	-3.811320755	YANA	4	1.7525	1.7525	1.7525	NA	1.7525	4	1.7525	1.7525	1.7525	NA	1.7525	1.7525	5	1.7525	1.7525	1.7525	1.7525	NA	4	1.7525	1.7525	1.7525	NA
492	70502	DRYSDALE	121347	2010	1087	2	7	22	W9A10COLE	3139	42	23	2	4	IRR	1.7342	g/100g	27/10/10 Lucerne	LAST	W9A10COLE_IRR	-15.5	15.5	1.570754717	-3.811320755	COLE	2	1.7342	NA	1.7342	1.7342	1.7342	3	1.7342	1.7342	NA	1.7342	1.7342	1.7342	4	1.7342	1.7342	1.7342	NA	1.7342	2	1.7342	NA	1.7342	1.7342
493	70503	WW20652	122074	2010	1357	2	7	23	W9A10COLE	3866	51	66	2	4	IRR	1.6838	g/100g	27/10/10 Lucerne	LAST	W9A10COLE_IRR	27.5	24.5	1.570754717	-3.811320755	COLE	4	1.6838	1.6838	1.6838	NA	1.6838	1	NA	1.6838	1.6838	1.6838	1.6838	1.6838	2	1.6838	NA	1.6838	1.6838	1.6838	1	NA	1.6838	1.6838	1.6838
494	70504	LPB04_2324	125105	2010	2421	2	7	24	W9A10YANA	2945	34	41	1	2	RFD	2.1934	g/100g	23/10/10 Hurricane	LAST	W9A10YANA_RFD	-3.5	11	1.570754717	-3.811320755	YANA	2	2.1934	NA	2.1934	2.1934	2.1934	3	2.1934	2.1934	NA	2.1934	2.1934	2.1934	5	2.1934	2.1934	2.1934	2.1934	NA	2	2.1934	NA	2.1934	2.1934
495	70505	WW19513	120024	2010	641	2	7	25	W9A10COLE	1816	24	68	1	2	RFD	0.86015	g/100g	19/10/2010	LAST	W9A10COLE_RFD	29.5	-2.5	1.570754717	-3.811320755	COLE	3	0.86015	0.86015	NA	0.86015	0.86015	1	NA	0.86015	0.86015	0.86015	0.86015	0.86015	2	0.86015	NA	0.86015	0.86015	0.86015	4	0.86015	0.86015	0.86015	NA
496	70506	WW19826	118388	2010	53	2	7	26	W9A10COLE	180	3	28	1	1	IRR	1.3591	g/100g	23/10/10 Lucerne	LAST	W9A10COLE_IRR	-10.5	-23.5	1.570754717	-3.811320755	COLE	1	NA	1.3591	1.3591	1.3591	1.3591	5	1.3591	1.3591	1.3591	1.3591	NA	1.3591	4	1.3591	1.3591	1.3591	NA	1.3591	5	1.3591	1.3591	1.3591	1.3591
497	70507	VW2847	120779	2010	888	2	7	27	W9A10COLE	2571	34	63	2	3	RFD	1.8657	g/100g	27/10/10 Lucerne	LAST	W9A10COLE_RFD	24.5	7.5	1.570754717	-3.811320755	COLE	5	1.8657	1.8657	1.8657	1.8657	NA	1	NA	1.8657	1.8657	1.8657	1.8657	1.8657	3	1.8657	1.8657	NA	1.8657	1.8657	4	1.8657	1.8657	1.8657	NA
498	70508	AUS33662	119281	2010	395	2	7	28	W9A10COLE	1073	15	9	1	2	RFD	2.2439	g/100g	19/10/2010	LAST	W9A10COLE_RFD	-29.5	-11.5	1.570754717	-3.811320755	COLE	1	NA	2.2439	2.2439	2.2439	2.2439	1	NA	2.2439	2.2439	2.2439	2.2439	2.2439	5	2.2439	2.2439	2.2439	2.2439	NA	2	2.2439	NA	2.2439	2.2439
499	70509	VW1194	124605	2010	2252	2	7	29	W9A10YANA	2445	28	69	2	4	IRR	1.917	g/100g	30/10/10 Hurricane	LAST	W9A10YANA_IRR	24.5	5	1.570754717	-3.811320755	YANA	4	1.917	1.917	1.917	NA	1.917	1	NA	1.917	1.917	1.917	1.917	1.917	3	1.917	1.917	NA	1.917	1.917	2	1.917	NA	1.917	1.917
500	70510	QT12667	122408	2010	1479	2	7	30	W9A10YANA	248	3	72	2	4	IRR	1.7698	g/100g	30/10/10 Hurricane	LAST	W9A10YANA_IRR	27.5	-20	1.570754717	-3.811320755	YANA	3	1.7698	1.7698	NA	1.7698	1.7698	2	1.7698	NA	1.7698	1.7698	1.7698	1.7698	1	NA	1.7698	1.7698	1.7698	1.7698	5	1.7698	1.7698	1.7698	1.7698
501	70511	120854_183	121999	2010	1329	2	8	1	W9A10COLE	3791	50	67	2	4	IRR	2.1571	g/100g	27/10/10 Lucerne	LAST	W9A10COLE_IRR	28.5	23.5	2.570754717	-3.811320755	COLE	2	2.1571	NA	2.1571	2.1571	2.1571	5	2.1571	2.1571	2.1571	2.1571	NA	2.1571	3	2.1571	2.1571	NA	2.1571	2.1571	1	NA	2.1571	2.1571	2.1571
502	70512	WW18791	125963	2010	2722	2	8	2	W9A10YANA	3803	44	19	1	1	IRR	1.6499	g/100g	23/10/10 Lucerne	LAST	W9A10YANA_IRR	-25.5	21	2.570754717	-3.811320755	YANA	5	1.6499	1.6499	1.6499	1.6499	NA	1	NA	1.6499	1.6499	1.6499	1.6499	1.6499	4	1.6499	1.6499	1.6499	NA	1.6499	1	NA	1.6499	1.6499	1.6499
503	70514	HRZ06_0145	124062	2010	2068	2	8	4	W9A10YANA	1902	22	54	2	3	RFD	2.4519	g/100g	30/10/10 Hurricane	LAST	W9A10YANA_RFD	9.5	-1	2.570754717	-3.811320755	YANA	3	2.4519	2.4519	NA	2.4519	2.4519	3	2.4519	2.4519	NA	2.4519	2.4519	2.4519	2	2.4519	NA	2.4519	2.4519	2.4519	5	2.4519	2.4519	2.4519	2.4519
504	70515	VW0395	123337	2010	1810	2	8	5	W9A10YANA	1177	14	33	1	2	RFD	1.7901	g/100g	23/10/10 Hurricane	LAST	W9A10YANA_RFD	-11.5	-9	2.570754717	-3.811320755	YANA	2	1.7901	NA	1.7901	1.7901	1.7901	4	1.7901	1.7901	1.7901	NA	1.7901	1.7901	4	1.7901	1.7901	1.7901	NA	1.7901	3	1.7901	1.7901	NA	1.7901
505	70516	HRZ04_0354	125676	2010	2622	2	8	6	W9A10YANA	3516	40	84	2	4	IRR	1.6575	g/100g	30/10/10 Lucerne	LAST	W9A10YANA_IRR	39.5	17	2.570754717	-3.811320755	YANA	2	1.6575	NA	1.6575	1.6575	1.6575	4	1.6575	1.6575	1.6575	NA	1.6575	1.6575	5	1.6575	1.6575	1.6575	1.6575	NA	2	1.6575	NA	1.6575	1.6575
506	70517	WW19473	118719	2010	160	2	8	7	W9A10COLE	511	7	55	1	1	IRR	1.726	g/100g	19/10/2010	LAST	W9A10COLE_IRR	16.5	-19.5	2.570754717	-3.811320755	COLE	4	1.726	1.726	1.726	NA	1.726	4	1.726	1.726	1.726	NA	1.726	1.726	1	NA	1.726	1.726	1.726	1.726	5	1.726	1.726	1.726	1.726
507	70518	WW20665	120653	2010	841	2	8	8	W9A10COLE	2445	33	13	2	3	RFD	1.7863	g/100g	27/10/10 Lucerne	LAST	W9A10COLE_RFD	-25.5	6.5	2.570754717	-3.811320755	COLE	1	NA	1.7863	1.7863	1.7863	1.7863	5	1.7863	1.7863	1.7863	1.7863	NA	1.7863	3	1.7863	1.7863	NA	1.7863	1.7863	4	1.7863	1.7863	1.7863	NA
508	70519	VW3463	122288	2010	1438	2	8	9	W9A10YANA	128	2	40	1	2	RFD	1.6614	g/100g	23/10/10 Hurricane	LAST	W9A10YANA_RFD	-4.5	-21	2.570754717	-3.811320755	YANA	5	1.6614	1.6614	1.6614	1.6614	NA	1	NA	1.6614	1.6614	1.6614	1.6614	1.6614	5	1.6614	1.6614	1.6614	1.6614	NA	5	1.6614	1.6614	1.6614	1.6614
509	70520	VW1256	121896	2010	1293	2	8	10	W9A10COLE	3688	49	40	2	4	IRR	1.506	g/100g	27/10/10 Lucerne	LAST	W9A10COLE_IRR	1.5	22.5	2.570754717	-3.811320755	COLE	1	NA	1.506	1.506	1.506	1.506	1	NA	1.506	1.506	1.506	1.506	1.506	5	1.506	1.506	1.506	1.506	NA	5	1.506	1.506	1.506	1.506
510	70521	WW19932	124551	2010	2232	2	8	11	W9A10YANA	2391	28	15	1	1	IRR	1.7142	g/100g	23/10/10 Lucerne	LAST	W9A10YANA_IRR	-29.5	5	2.570754717	-3.811320755	YANA	3	1.7142	1.7142	NA	1.7142	1.7142	5	1.7142	1.7142	1.7142	1.7142	NA	1.7142	4	1.7142	1.7142	1.7142	NA	1.7142	5	1.7142	1.7142	1.7142	1.7142
511	70522	WW18784	124053	2010	2063	2	8	12	W9A10YANA	1893	22	45	2	3	RFD	2.1449	g/100g	27/10/10 Lucerne	LAST	W9A10YANA_RFD	0.5	-1	2.570754717	-3.811320755	YANA	2	2.1449	NA	2.1449	2.1449	2.1449	4	2.1449	2.1449	2.1449	NA	2.1449	2.1449	3	2.1449	2.1449	NA	2.1449	2.1449	1	NA	2.1449	2.1449	2.1449
512	70523	WW20256	125104	2010	2420	2	8	13	W9A10YANA	2944	34	40	1	2	RFD	2.2197	g/100g	23/10/10 Hurricane	LAST	W9A10YANA_RFD	-4.5	11	2.570754717	-3.811320755	YANA	2	2.2197	NA	2.2197	2.2197	2.2197	5	2.2197	2.2197	2.2197	2.2197	NA	2.2197	2	2.2197	NA	2.2197	2.2197	2.2197	1	NA	2.2197	2.2197	2.2197
513	70524	VW0394	125660	2010	2613	2	8	14	W9A10YANA	3500	40	68	2	4	IRR	1.5693	g/100g	30/10/10 Lucerne	LAST	W9A10YANA_IRR	23.5	17	2.570754717	-3.811320755	YANA	2	1.5693	NA	1.5693	1.5693	1.5693	1	NA	1.5693	1.5693	1.5693	1.5693	1.5693	5	1.5693	1.5693	1.5693	1.5693	NA	2	1.5693	NA	1.5693	1.5693
514	70525	VW2847	125750	2010	2642	2	8	15	W9A10YANA	3590	41	70	2	4	IRR	1.9361	g/100g	30/10/10 Hurricane	LAST	W9A10YANA_IRR	25.5	18	2.570754717	-3.811320755	YANA	5	1.9361	1.9361	1.9361	1.9361	NA	1	NA	1.9361	1.9361	1.9361	1.9361	1.9361	3	1.9361	1.9361	NA	1.9361	1.9361	4	1.9361	1.9361	1.9361	NA
515	70526	IRENA/BABAX//PASTOR	124060	2010	2066	2	8	16	W9A10YANA	1900	22	52	2	3	RFD	1.7958	g/100g	30/10/10 Lucerne	LAST	W9A10YANA_RFD	7.5	-1	2.570754717	-3.811320755	YANA	5	1.7958	1.7958	1.7958	1.7958	NA	1	NA	1.7958	1.7958	1.7958	1.7958	1.7958	2	1.7958	NA	1.7958	1.7958	1.7958	2	1.7958	NA	1.7958	1.7958
516	70527	VW0823	124901	2010	2347	2	8	17	W9A10YANA	2741	32	13	1	1	IRR	2.0461	g/100g	23/10/10 Lucerne	LAST	W9A10YANA_IRR	-31.5	9	2.570754717	-3.811320755	YANA	3	2.0461	2.0461	NA	2.0461	2.0461	3	2.0461	2.0461	NA	2.0461	2.0461	2.0461	4	2.0461	2.0461	2.0461	NA	2.0461	4	2.0461	2.0461	2.0461	NA
517	70528	WW18769	125432	2010	2538	2	8	18	W9A10YANA	3272	38	16	1	1	IRR	1.6427	g/100g	23/10/10 Lucerne	LAST	W9A10YANA_IRR	-28.5	15	2.570754717	-3.811320755	YANA	4	1.6427	1.6427	1.6427	NA	1.6427	1	NA	1.6427	1.6427	1.6427	1.6427	1.6427	3	1.6427	1.6427	NA	1.6427	1.6427	1	NA	1.6427	1.6427	1.6427
518	70529	VW4192	122787	2010	1607	2	8	19	W9A10YANA	627	8	11	1	1	IRR	1.9427	g/100g	23/10/10 Hurricane	LAST	W9A10YANA_IRR	-33.5	-15	2.570754717	-3.811320755	YANA	2	1.9427	NA	1.9427	1.9427	1.9427	1	NA	1.9427	1.9427	1.9427	1.9427	1.9427	2	1.9427	NA	1.9427	1.9427	1.9427	2	1.9427	NA	1.9427	1.9427
519	70530	WW20406	121590	2010	1185	2	8	20	W9A10COLE	3382	45	38	2	4	IRR	1.0308	g/100g	27/10/10 Hurricane	LAST	W9A10COLE_IRR	-0.5	18.5	2.570754717	-3.811320755	COLE	3	1.0308	1.0308	NA	1.0308	1.0308	2	1.0308	NA	1.0308	1.0308	1.0308	1.0308	5	1.0308	1.0308	1.0308	1.0308	NA	5	1.0308	1.0308	1.0308	1.0308
520	70531	WW16259	124334	2010	2160	2	8	21	W9A10YANA	2174	25	62	2	3	RFD	2.0138	g/100g	30/10/10 Hurricane	LAST	W9A10YANA_RFD	17.5	2	2.570754717	-3.811320755	YANA	2	2.0138	NA	2.0138	2.0138	2.0138	5	2.0138	2.0138	2.0138	2.0138	NA	2.0138	5	2.0138	2.0138	2.0138	2.0138	NA	4	2.0138	2.0138	2.0138	NA
521	70532	HRZ04_0111	120988	2010	975	2	8	22	W9A10COLE	2780	37	44	2	3	RFD	2.1336	g/100g	27/10/10 Lucerne	LAST	W9A10COLE_RFD	5.5	10.5	2.570754717	-3.811320755	COLE	4	2.1336	2.1336	2.1336	NA	2.1336	4	2.1336	2.1336	2.1336	NA	2.1336	2.1336	5	2.1336	2.1336	2.1336	2.1336	NA	2	2.1336	NA	2.1336	2.1336
522	70533	WW18830	124458	2010	2206	2	8	23	W9A10YANA	2298	27	10	1	1	IRR	1.4435	g/100g	23/10/10 Lucerne	LAST	W9A10YANA_IRR	-34.5	4	2.570754717	-3.811320755	YANA	5	1.4435	1.4435	1.4435	1.4435	NA	2	1.4435	NA	1.4435	1.4435	1.4435	1.4435	4	1.4435	1.4435	1.4435	NA	1.4435	5	1.4435	1.4435	1.4435	1.4435
523	70534	WW20577	121872	2010	1284	2	8	24	W9A10COLE	3664	49	16	2	4	IRR	1.7875	g/100g	27/10/10 Lucerne	LAST	W9A10COLE_IRR	-22.5	22.5	2.570754717	-3.811320755	COLE	5	1.7875	1.7875	1.7875	1.7875	NA	2	1.7875	NA	1.7875	1.7875	1.7875	1.7875	1	NA	1.7875	1.7875	1.7875	1.7875	1	NA	1.7875	1.7875	1.7875
524	70535	VW3717	120974	2010	974	2	8	25	W9A10COLE	2766	37	30	2	3	RFD	1.5981	g/100g	27/10/10 Lucerne	LAST	W9A10COLE_RFD	-8.5	10.5	2.570754717	-3.811320755	COLE	1	NA	1.5981	1.5981	1.5981	1.5981	4	1.5981	1.5981	1.5981	NA	1.5981	1.5981	5	1.5981	1.5981	1.5981	1.5981	NA	5	1.5981	1.5981	1.5981	1.5981
525	70536	DAKOTA	121356	2010	1090	2	8	26	W9A10COLE	3148	42	32	2	4	IRR	1.4127	g/100g	27/10/10 Lucerne	LAST	W9A10COLE_IRR	-6.5	15.5	2.570754717	-3.811320755	COLE	2	1.4127	NA	1.4127	1.4127	1.4127	5	1.4127	1.4127	1.4127	1.4127	NA	1.4127	1	NA	1.4127	1.4127	1.4127	1.4127	1	NA	1.4127	1.4127	1.4127
526	70537	HRZ05_0224	124501	2010	2219	2	8	27	W9A10YANA	2341	27	53	2	3	RFD	1.686	g/100g	30/10/10 Lucerne	LAST	W9A10YANA_RFD	8.5	4	2.570754717	-3.811320755	YANA	5	1.686	1.686	1.686	1.686	NA	2	1.686	NA	1.686	1.686	1.686	1.686	3	1.686	1.686	NA	1.686	1.686	4	1.686	1.686	1.686	NA
527	70538	VW0379	124228	2010	2123	2	8	28	W9A10YANA	2068	24	44	1	2	RFD	2.3885	g/100g	23/10/10 Hurricane	LAST	W9A10YANA_RFD	-0.5	1	2.570754717	-3.811320755	YANA	1	NA	2.3885	2.3885	2.3885	2.3885	1	NA	2.3885	2.3885	2.3885	2.3885	2.3885	3	2.3885	2.3885	NA	2.3885	2.3885	5	2.3885	2.3885	2.3885	2.3885
528	70539	VW3463	124595	2010	2246	2	8	29	W9A10YANA	2435	28	59	2	3	RFD	1.767	g/100g	30/10/10 Hurricane	LAST	W9A10YANA_RFD	14.5	5	2.570754717	-3.811320755	YANA	5	1.767	1.767	1.767	1.767	NA	1	NA	1.767	1.767	1.767	1.767	1.767	5	1.767	1.767	1.767	1.767	NA	5	1.767	1.767	1.767	1.767
529	70540	WW20664	122654	2010	1562	2	8	30	W9A10YANA	494	6	54	2	3	RFD	1.8424	g/100g	30/10/10 Lucerne	LAST	W9A10YANA_RFD	9.5	-17	2.570754717	-3.811320755	YANA	3	1.8424	1.8424	NA	1.8424	1.8424	3	1.8424	1.8424	NA	1.8424	1.8424	1.8424	2	1.8424	NA	1.8424	1.8424	1.8424	4	1.8424	1.8424	1.8424	NA
530	70541	8890_213	125574	2010	2586	2	9	1	W9A10YANA	3414	39	70	2	4	IRR	1.3499	g/100g	30/10/10 Lucerne	LAST	W9A10YANA_IRR	25.5	16	3.570754717	-3.811320755	YANA	3	1.3499	1.3499	NA	1.3499	1.3499	3	1.3499	1.3499	NA	1.3499	1.3499	1.3499	5	1.3499	1.3499	1.3499	1.3499	NA	1	NA	1.3499	1.3499	1.3499
531	70542	VW3405	122044	2010	1346	2	9	2	W9A10COLE	3836	51	36	2	4	IRR	1.4182	g/100g	27/10/10 Lucerne	LAST	W9A10COLE_IRR	-2.5	24.5	3.570754717	-3.811320755	COLE	3	1.4182	1.4182	NA	1.4182	1.4182	3	1.4182	1.4182	NA	1.4182	1.4182	1.4182	1	NA	1.4182	1.4182	1.4182	1.4182	5	1.4182	1.4182	1.4182	1.4182
532	70543	AUS33467	119070	2010	286	2	9	3	W9A10COLE	862	12	26	1	1	IRR	2.5341	g/100g	19/10/2010	LAST	W9A10COLE_IRR	-12.5	-14.5	3.570754717	-3.811320755	COLE	1	NA	2.5341	2.5341	2.5341	2.5341	1	NA	2.5341	2.5341	2.5341	2.5341	2.5341	3	2.5341	2.5341	NA	2.5341	2.5341	5	2.5341	2.5341	2.5341	2.5341
533	70544	WAWHT3016	120482	2010	780	2	9	4	W9A10COLE	2274	30	70	2	3	RFD	1.8599	g/100g	27/10/10 Lucerne	LAST	W9A10COLE_RFD	31.5	3.5	3.570754717	-3.811320755	COLE	3	1.8599	1.8599	NA	1.8599	1.8599	5	1.8599	1.8599	1.8599	1.8599	NA	1.8599	5	1.8599	1.8599	1.8599	1.8599	NA	2	1.8599	NA	1.8599	1.8599
534	70545	VW0241	118368	2010	48	2	9	5	W9A10COLE	160	3	8	1	1	IRR	1.5859	g/100g	23/10/10 Lucerne	LAST	W9A10COLE_IRR	-30.5	-23.5	3.570754717	-3.811320755	COLE	4	1.5859	1.5859	1.5859	NA	1.5859	5	1.5859	1.5859	1.5859	1.5859	NA	1.5859	3	1.5859	1.5859	NA	1.5859	1.5859	2	1.5859	NA	1.5859	1.5859
535	70546	VW0398	125776	2010	2652	2	9	6	W9A10YANA	3616	42	8	1	1	IRR	0.94667	g/100g	23/10/10 Lucerne	LAST	W9A10YANA_IRR	-36.5	19	3.570754717	-3.811320755	YANA	4	0.94667	0.94667	0.94667	NA	0.94667	4	0.94667	0.94667	0.94667	NA	0.94667	0.94667	1	NA	0.94667	0.94667	0.94667	0.94667	4	0.94667	0.94667	0.94667	NA
536	70547	HRZ06_0143	122693	2010	1578	2	9	7	W9A10YANA	533	7	5	1	1	IRR	1.0659	g/100g	23/10/10 Lucerne	LAST	W9A10YANA_IRR	-39.5	-16	3.570754717	-3.811320755	YANA	2	1.0659	NA	1.0659	1.0659	1.0659	5	1.0659	1.0659	1.0659	1.0659	NA	1.0659	3	1.0659	1.0659	NA	1.0659	1.0659	2	1.0659	NA	1.0659	1.0659
537	70548	HRZ05_0130	123319	2010	1805	2	9	8	W9A10YANA	1159	14	15	1	1	IRR	1.1072	g/100g	23/10/10 Hurricane	LAST	W9A10YANA_IRR	-29.5	-9	3.570754717	-3.811320755	YANA	5	1.1072	1.1072	1.1072	1.1072	NA	2	1.1072	NA	1.1072	1.1072	1.1072	1.1072	5	1.1072	1.1072	1.1072	1.1072	NA	1	NA	1.1072	1.1072	1.1072
538	70549	HRZ03_0061	124187	2010	2110	2	9	9	W9A10YANA	2027	24	3	1	1	IRR	1.4623	g/100g	23/10/10 Lucerne	LAST	W9A10YANA_IRR	-41.5	1	3.570754717	-3.811320755	YANA	5	1.4623	1.4623	1.4623	1.4623	NA	4	1.4623	1.4623	1.4623	NA	1.4623	1.4623	2	1.4623	NA	1.4623	1.4623	1.4623	5	1.4623	1.4623	1.4623	1.4623
539	70550	9329_13	118865	2010	207	2	9	10	W9A10COLE	657	9	49	1	1	IRR	1.8926	g/100g	19/10/2010	LAST	W9A10COLE_IRR	10.5	-17.5	3.570754717	-3.811320755	COLE	5	1.8926	1.8926	1.8926	1.8926	NA	1	NA	1.8926	1.8926	1.8926	1.8926	1.8926	2	1.8926	NA	1.8926	1.8926	1.8926	4	1.8926	1.8926	1.8926	NA
540	70551	VENTURA	122344	2010	1457	2	9	11	W9A10YANA	184	3	8	1	1	IRR	2.0821	g/100g	23/10/10 Lucerne	LAST	W9A10YANA_IRR	-36.5	-20	3.570754717	-3.811320755	YANA	1	NA	2.0821	2.0821	2.0821	2.0821	5	2.0821	2.0821	2.0821	2.0821	NA	2.0821	4	2.0821	2.0821	2.0821	NA	2.0821	4	2.0821	2.0821	2.0821	NA
541	70552	VT2474	123211	2010	1769	2	9	12	W9A10YANA	1051	12	83	2	4	IRR	2.0489	g/100g	30/10/10 Hurricane	LAST	W9A10YANA_IRR	38.5	-11	3.570754717	-3.811320755	YANA	5	2.0489	2.0489	2.0489	2.0489	NA	5	2.0489	2.0489	2.0489	2.0489	NA	2.0489	3	2.0489	2.0489	NA	2.0489	2.0489	5	2.0489	2.0489	2.0489	2.0489
542	70553	QT13354	121456	2010	1140	2	9	13	W9A10COLE	3248	43	56	2	4	IRR	1.5463	g/100g	27/10/10 Lucerne	LAST	W9A10COLE_IRR	17.5	16.5	3.570754717	-3.811320755	COLE	3	1.5463	1.5463	NA	1.5463	1.5463	1	NA	1.5463	1.5463	1.5463	1.5463	1.5463	4	1.5463	1.5463	1.5463	NA	1.5463	2	1.5463	NA	1.5463	1.5463
543	70554	WW3028_4	118300	2010	26	2	9	14	W9A10COLE	92	2	16	1	1	IRR	1.4566	g/100g	19/10/2010	LAST	W9A10COLE_IRR	-22.5	-24.5	3.570754717	-3.811320755	COLE	3	1.4566	1.4566	NA	1.4566	1.4566	5	1.4566	1.4566	1.4566	1.4566	NA	1.4566	5	1.4566	1.4566	1.4566	1.4566	NA	5	1.4566	1.4566	1.4566	1.4566
544	70555	WW20192	122573	2010	1533	2	9	15	W9A10YANA	413	5	61	2	3	RFD	1.542	g/100g	30/10/10 Lucerne	LAST	W9A10YANA_RFD	16.5	-18	3.570754717	-3.811320755	YANA	5	1.542	1.542	1.542	1.542	NA	5	1.542	1.542	1.542	1.542	NA	1.542	1	NA	1.542	1.542	1.542	1.542	4	1.542	1.542	1.542	NA
545	70556	WW19525	122610	2010	1550	2	9	16	W9A10YANA	450	6	10	1	1	IRR	1.7333	g/100g	23/10/10 Hurricane	LAST	W9A10YANA_IRR	-34.5	-17	3.570754717	-3.811320755	YANA	1	NA	1.7333	1.7333	1.7333	1.7333	4	1.7333	1.7333	1.7333	NA	1.7333	1.7333	2	1.7333	NA	1.7333	1.7333	1.7333	5	1.7333	1.7333	1.7333	1.7333
546	70557	HRZ05_0224	125805	2010	2660	2	9	17	W9A10YANA	3645	42	37	1	2	RFD	1.3877	g/100g	23/10/10 Hurricane	LAST	W9A10YANA_RFD	-7.5	19	3.570754717	-3.811320755	YANA	5	1.3877	1.3877	1.3877	1.3877	NA	2	1.3877	NA	1.3877	1.3877	1.3877	1.3877	3	1.3877	1.3877	NA	1.3877	1.3877	4	1.3877	1.3877	1.3877	NA
547	70558	SERI_DWARF	120471	2010	778	2	9	18	W9A10COLE	2263	30	59	2	3	RFD	2.4575	g/100g	27/10/10 Lucerne	LAST	W9A10COLE_RFD	20.5	3.5	3.570754717	-3.811320755	COLE	5	2.4575	2.4575	2.4575	2.4575	NA	3	2.4575	2.4575	NA	2.4575	2.4575	2.4575	4	2.4575	2.4575	2.4575	NA	2.4575	2	2.4575	NA	2.4575	2.4575
548	70559	AUS33467	125866	2010	2686	2	9	19	W9A10YANA	3706	43	10	1	1	IRR	1.6849	g/100g	23/10/10 Lucerne	LAST	W9A10YANA_IRR	-34.5	20	3.570754717	-3.811320755	YANA	1	NA	1.6849	1.6849	1.6849	1.6849	1	NA	1.6849	1.6849	1.6849	1.6849	1.6849	3	1.6849	1.6849	NA	1.6849	1.6849	5	1.6849	1.6849	1.6849	1.6849
549	70560	HRZ04_0421	124917	2010	2353	2	9	20	W9A10YANA	2757	32	29	1	2	RFD	2.5113	g/100g	23/10/10 Hurricane	LAST	W9A10YANA_RFD	-15.5	9	3.570754717	-3.811320755	YANA	5	2.5113	2.5113	2.5113	2.5113	NA	1	NA	2.5113	2.5113	2.5113	2.5113	2.5113	1	NA	2.5113	2.5113	2.5113	2.5113	1	NA	2.5113	2.5113	2.5113
550	70561	WW19954	125998	2010	2735	2	9	21	W9A10YANA	3838	44	54	2	3	RFD	1.8668	g/100g	30/10/10 Lucerne	LAST	W9A10YANA_RFD	9.5	21	3.570754717	-3.811320755	YANA	2	1.8668	NA	1.8668	1.8668	1.8668	5	1.8668	1.8668	1.8668	1.8668	NA	1.8668	4	1.8668	1.8668	1.8668	NA	1.8668	3	1.8668	1.8668	NA	1.8668
551	70562	HRZ04_0533	124321	2010	2157	2	9	22	W9A10YANA	2161	25	49	2	3	RFD	1.7083	g/100g	30/10/10 Lucerne	LAST	W9A10YANA_RFD	4.5	2	3.570754717	-3.811320755	YANA	3	1.7083	1.7083	NA	1.7083	1.7083	3	1.7083	1.7083	NA	1.7083	1.7083	1.7083	1	NA	1.7083	1.7083	1.7083	1.7083	3	1.7083	1.7083	NA	1.7083
552	70563	WW21162	122952	2010	1670	2	9	23	W9A10YANA	792	9	88	2	4	IRR	1.195	g/100g	30/10/10 Lucerne	LAST	W9A10YANA_IRR	43.5	-14	3.570754717	-3.811320755	YANA	4	1.195	1.195	1.195	NA	1.195	1	NA	1.195	1.195	1.195	1.195	1.195	3	1.195	1.195	NA	1.195	1.195	2	1.195	NA	1.195	1.195
553	70564	WW20689	120063	2010	659	2	9	24	W9A10COLE	1855	25	31	1	2	RFD	2.1241	g/100g	19/10/2010	LAST	W9A10COLE_RFD	-7.5	-1.5	3.570754717	-3.811320755	COLE	1	NA	2.1241	2.1241	2.1241	2.1241	1	NA	2.1241	2.1241	2.1241	2.1241	2.1241	4	2.1241	2.1241	2.1241	NA	2.1241	1	NA	2.1241	2.1241	2.1241
554	70565	WW21573	120248	2010	714	2	9	25	W9A10COLE	2040	27	64	2	3	RFD	2.3401	g/100g	27/10/10 Lucerne	LAST	W9A10COLE_RFD	25.5	0.5	3.570754717	-3.811320755	COLE	1	NA	2.3401	2.3401	2.3401	2.3401	1	NA	2.3401	2.3401	2.3401	2.3401	2.3401	5	2.3401	2.3401	2.3401	2.3401	NA	5	2.3401	2.3401	2.3401	2.3401
555	70566	WAGT023	124828	2010	2324	2	9	26	W9A10YANA	2668	31	28	1	2	RFD	2.3889	g/100g	23/10/10 Hurricane	LAST	W9A10YANA_RFD	-16.5	8	3.570754717	-3.811320755	YANA	5	2.3889	2.3889	2.3889	2.3889	NA	5	2.3889	2.3889	2.3889	2.3889	NA	2.3889	5	2.3889	2.3889	2.3889	2.3889	NA	3	2.3889	2.3889	NA	2.3889
556	70567	WW19662	120569	2010	809	2	9	27	W9A10COLE	2361	32	5	2	3	RFD	1.8584	g/100g	27/10/10 Lucerne	LAST	W9A10COLE_RFD	-33.5	5.5	3.570754717	-3.811320755	COLE	4	1.8584	1.8584	1.8584	NA	1.8584	5	1.8584	1.8584	1.8584	1.8584	NA	1.8584	5	1.8584	1.8584	1.8584	1.8584	NA	1	NA	1.8584	1.8584	1.8584
557	70568	120854_183	123355	2010	1814	2	9	28	W9A10YANA	1195	14	51	2	3	RFD	2.0563	g/100g	30/10/10 Hurricane	LAST	W9A10YANA_RFD	6.5	-9	3.570754717	-3.811320755	YANA	2	2.0563	NA	2.0563	2.0563	2.0563	5	2.0563	2.0563	2.0563	2.0563	NA	2.0563	3	2.0563	2.0563	NA	2.0563	2.0563	1	NA	2.0563	2.0563	2.0563
558	70569	HRZ06_2087	121176	2010	1043	2	9	29	W9A10COLE	2968	40	4	2	4	IRR	1.7461	g/100g	27/10/10 Lucerne	LAST	W9A10COLE_IRR	-34.5	13.5	3.570754717	-3.811320755	COLE	2	1.7461	NA	1.7461	1.7461	1.7461	3	1.7461	1.7461	NA	1.7461	1.7461	1.7461	2	1.7461	NA	1.7461	1.7461	1.7461	5	1.7461	1.7461	1.7461	1.7461
559	70570	120854_183	119543	2010	483	2	9	30	W9A10COLE	1335	18	43	1	2	RFD	1.9731	g/100g	12/10/2010	LAST	W9A10COLE_RFD	4.5	-8.5	3.570754717	-3.811320755	COLE	2	1.9731	NA	1.9731	1.9731	1.9731	5	1.9731	1.9731	1.9731	1.9731	NA	1.9731	3	1.9731	1.9731	NA	1.9731	1.9731	1	NA	1.9731	1.9731	1.9731
560	70571	HRZ06_2202	123701	2010	1939	2	10	1	W9A10YANA	1541	18	45	2	3	RFD	1.741	g/100g	30/10/10 Lucerne	LAST	W9A10YANA_RFD	0.5	-5	4.570754717	-3.811320755	YANA	2	1.741	NA	1.741	1.741	1.741	5	1.741	1.741	1.741	1.741	NA	1.741	1	NA	1.741	1.741	1.741	1.741	3	1.741	1.741	NA	1.741
561	70572	HRZ03_0062	121394	2010	1112	2	10	2	W9A10COLE	3186	42	70	2	4	IRR	0.89926	g/100g	27/10/10 Lucerne	LAST	W9A10COLE_IRR	31.5	15.5	4.570754717	-3.811320755	COLE	3	0.89926	0.89926	NA	0.89926	0.89926	2	0.89926	NA	0.89926	0.89926	0.89926	0.89926	3	0.89926	0.89926	NA	0.89926	0.89926	3	0.89926	0.89926	NA	0.89926
562	70573	HRZ06_0034	125332	2010	2503	2	10	3	W9A10YANA	3172	37	4	1	1	IRR	1.8205	g/100g	23/10/10 Lucerne	LAST	W9A10YANA_IRR	-40.5	14	4.570754717	-3.811320755	YANA	3	1.8205	1.8205	NA	1.8205	1.8205	1	NA	1.8205	1.8205	1.8205	1.8205	1.8205	1	NA	1.8205	1.8205	1.8205	1.8205	3	1.8205	1.8205	NA	1.8205
563	70574	WW18949	123048	2010	1709	2	10	4	W9A10YANA	888	11	8	1	1	IRR	1.8324	g/100g	23/10/10 Lucerne	LAST	W9A10YANA_IRR	-36.5	-12	4.570754717	-3.811320755	YANA	5	1.8324	1.8324	1.8324	1.8324	NA	3	1.8324	1.8324	NA	1.8324	1.8324	1.8324	2	1.8324	NA	1.8324	1.8324	1.8324	4	1.8324	1.8324	1.8324	NA
564	70575	WW19662	121852	2010	1279	2	10	5	W9A10COLE	3644	48	72	2	4	IRR	2.1404	g/100g	27/10/10 Lucerne	LAST	W9A10COLE_IRR	33.5	21.5	4.570754717	-3.811320755	COLE	4	2.1404	2.1404	2.1404	NA	2.1404	5	2.1404	2.1404	2.1404	2.1404	NA	2.1404	5	2.1404	2.1404	2.1404	2.1404	NA	1	NA	2.1404	2.1404	2.1404
565	70576	PEAKE	126060	2010	2757	2	10	6	W9A10YANA	3900	45	28	1	2	RFD	2.1236	g/100g	23/10/10 Hurricane	LAST	W9A10YANA_RFD	-16.5	22	4.570754717	-3.811320755	YANA	5	2.1236	2.1236	2.1236	2.1236	NA	4	2.1236	2.1236	2.1236	NA	2.1236	2.1236	1	NA	2.1236	2.1236	2.1236	2.1236	4	2.1236	2.1236	2.1236	NA
566	70577	SUN571B	122110	2010	1370	2	10	7	W9A10COLE	3902	52	26	2	4	IRR	1.9394	g/100g	27/10/10 Lucerne	LAST	W9A10COLE_IRR	-12.5	25.5	4.570754717	-3.811320755	COLE	5	1.9394	1.9394	1.9394	1.9394	NA	3	1.9394	1.9394	NA	1.9394	1.9394	1.9394	5	1.9394	1.9394	1.9394	1.9394	NA	3	1.9394	1.9394	NA	1.9394
567	70578	GASCOIGNE	118305	2010	27	2	10	8	W9A10COLE	97	2	21	1	1	IRR	1.7085	g/100g	19/10/2010	LAST	W9A10COLE_IRR	-17.5	-24.5	4.570754717	-3.811320755	COLE	4	1.7085	1.7085	1.7085	NA	1.7085	3	1.7085	1.7085	NA	1.7085	1.7085	1.7085	5	1.7085	1.7085	1.7085	1.7085	NA	5	1.7085	1.7085	1.7085	1.7085
568	70579	9329_13	120518	2010	790	2	10	9	W9A10COLE	2310	31	30	2	3	RFD	2.1855	g/100g	27/10/10 Lucerne	LAST	W9A10COLE_RFD	-8.5	4.5	4.570754717	-3.811320755	COLE	5	2.1855	2.1855	2.1855	2.1855	NA	1	NA	2.1855	2.1855	2.1855	2.1855	2.1855	2	2.1855	NA	2.1855	2.1855	2.1855	4	2.1855	2.1855	2.1855	NA
569	70580	DIAMONDBIRD	121389	2010	1108	2	10	10	W9A10COLE	3181	42	65	2	4	IRR	1.5795	g/100g	27/10/10 Lucerne	LAST	W9A10COLE_IRR	26.5	15.5	4.570754717	-3.811320755	COLE	4	1.5795	1.5795	1.5795	NA	1.5795	1	NA	1.5795	1.5795	1.5795	1.5795	1.5795	2	1.5795	NA	1.5795	1.5795	1.5795	4	1.5795	1.5795	1.5795	NA
570	70581	VW2705	123184	2010	1756	2	10	11	W9A10YANA	1024	12	56	2	3	RFD	2.5478	g/100g	30/10/10 Hurricane	LAST	W9A10YANA_RFD	11.5	-11	4.570754717	-3.811320755	YANA	5	2.5478	2.5478	2.5478	2.5478	NA	2	2.5478	NA	2.5478	2.5478	2.5478	2.5478	2	2.5478	NA	2.5478	2.5478	2.5478	1	NA	2.5478	2.5478	2.5478
571	70582	WW16452	122889	2010	1646	2	10	12	W9A10YANA	729	9	25	1	2	RFD	1.823	g/100g	23/10/10 Hurricane	LAST	W9A10YANA_RFD	-19.5	-14	4.570754717	-3.811320755	YANA	2	1.823	NA	1.823	1.823	1.823	1	NA	1.823	1.823	1.823	1.823	1.823	4	1.823	1.823	1.823	NA	1.823	4	1.823	1.823	1.823	NA
572	70583	HRZ06_0043	123600	2010	1903	2	10	13	W9A10YANA	1440	17	32	1	2	RFD	2.4525	g/100g	23/10/10 Hurricane	LAST	W9A10YANA_RFD	-12.5	-6	4.570754717	-3.811320755	YANA	5	2.4525	2.4525	2.4525	2.4525	NA	3	2.4525	2.4525	NA	2.4525	2.4525	2.4525	1	NA	2.4525	2.4525	2.4525	2.4525	1	NA	2.4525	2.4525	2.4525
573	70584	WW18957	123587	2010	1899	2	10	14	W9A10YANA	1427	17	19	1	1	IRR	2.5967	g/100g	23/10/10 Hurricane	LAST	W9A10YANA_IRR	-25.5	-6	4.570754717	-3.811320755	YANA	5	2.5967	2.5967	2.5967	2.5967	NA	4	2.5967	2.5967	2.5967	NA	2.5967	2.5967	5	2.5967	2.5967	2.5967	2.5967	NA	5	2.5967	2.5967	2.5967	2.5967
574	70585	LPB04_2172	120669	2010	847	2	10	15	W9A10COLE	2461	33	29	2	3	RFD	2.536	g/100g	27/10/10 Lucerne	LAST	W9A10COLE_RFD	-9.5	6.5	4.570754717	-3.811320755	COLE	1	NA	2.536	2.536	2.536	2.536	4	2.536	2.536	2.536	NA	2.536	2.536	2	2.536	NA	2.536	2.536	2.536	1	NA	2.536	2.536	2.536
575	70586	VW0222	124896	2010	2346	2	10	16	W9A10YANA	2736	32	8	1	1	IRR	1.6978	g/100g	23/10/10 Lucerne	LAST	W9A10YANA_IRR	-36.5	9	4.570754717	-3.811320755	YANA	2	1.6978	NA	1.6978	1.6978	1.6978	1	NA	1.6978	1.6978	1.6978	1.6978	1.6978	1	NA	1.6978	1.6978	1.6978	1.6978	2	1.6978	NA	1.6978	1.6978
576	70587	WW20140	121910	2010	1298	2	10	17	W9A10COLE	3702	49	54	2	4	IRR	2.0707	g/100g	27/10/10 Lucerne	LAST	W9A10COLE_IRR	15.5	22.5	4.570754717	-3.811320755	COLE	3	2.0707	2.0707	NA	2.0707	2.0707	4	2.0707	2.0707	2.0707	NA	2.0707	2.0707	4	2.0707	2.0707	2.0707	NA	2.0707	5	2.0707	2.0707	2.0707	2.0707
577	70588	WW19513	123484	2010	1860	2	10	18	W9A10YANA	1324	16	4	1	1	IRR	2.1513	g/100g	23/10/10 Lucerne	LAST	W9A10YANA_IRR	-40.5	-7	4.570754717	-3.811320755	YANA	3	2.1513	2.1513	NA	2.1513	2.1513	1	NA	2.1513	2.1513	2.1513	2.1513	2.1513	2	2.1513	NA	2.1513	2.1513	2.1513	4	2.1513	2.1513	2.1513	NA
578	70589	VW2694	121307	2010	1078	2	10	19	W9A10COLE	3099	41	59	2	4	IRR	0.46029	g/100g	27/10/10 Lucerne	LAST	W9A10COLE_IRR	20.5	14.5	4.570754717	-3.811320755	COLE	4	0.46029	0.46029	0.46029	NA	0.46029	5	0.46029	0.46029	0.46029	0.46029	NA	0.46029	5	0.46029	0.46029	0.46029	0.46029	NA	1	NA	0.46029	0.46029	0.46029
579	70591	RAC1418	121600	2010	1190	2	10	21	W9A10COLE	3392	45	48	2	4	IRR	1.4021	g/100g	27/10/10 Lucerne	LAST	W9A10COLE_IRR	9.5	18.5	4.570754717	-3.811320755	COLE	3	1.4021	1.4021	NA	1.4021	1.4021	2	1.4021	NA	1.4021	1.4021	1.4021	1.4021	5	1.4021	1.4021	1.4021	1.4021	NA	4	1.4021	1.4021	1.4021	NA
580	70592	VW3466	118473	2010	87	2	10	22	W9A10COLE	265	4	37	1	1	IRR	1.802	g/100g	19/10/2010	LAST	W9A10COLE_IRR	-1.5	-22.5	4.570754717	-3.811320755	COLE	1	NA	1.802	1.802	1.802	1.802	3	1.802	1.802	NA	1.802	1.802	1.802	4	1.802	1.802	1.802	NA	1.802	3	1.802	1.802	NA	1.802
581	70593	WW20291	125155	2010	2436	2	10	23	W9A10YANA	2995	35	3	1	1	IRR	1.9835	g/100g	23/10/10 Lucerne	LAST	W9A10YANA_IRR	-41.5	12	4.570754717	-3.811320755	YANA	4	1.9835	1.9835	1.9835	NA	1.9835	3	1.9835	1.9835	NA	1.9835	1.9835	1.9835	2	1.9835	NA	1.9835	1.9835	1.9835	4	1.9835	1.9835	1.9835	NA
582	70594	BARHAM	119173	2010	339	2	10	24	W9A10COLE	965	13	53	1	1	IRR	0.62359	g/100g	12/10/2010	LAST	W9A10COLE_IRR	14.5	-13.5	4.570754717	-3.811320755	COLE	2	0.62359	NA	0.62359	0.62359	0.62359	4	0.62359	0.62359	0.62359	NA	0.62359	0.62359	4	0.62359	0.62359	0.62359	NA	0.62359	5	0.62359	0.62359	0.62359	0.62359
583	70595	VW3707	119468	2010	463	2	10	25	W9A10COLE	1260	17	44	1	2	RFD	1.3782	g/100g	19/10/2010	LAST	W9A10COLE_RFD	5.5	-9.5	4.570754717	-3.811320755	COLE	3	1.3782	1.3782	NA	1.3782	1.3782	1	NA	1.3782	1.3782	1.3782	1.3782	1.3782	3	1.3782	1.3782	NA	1.3782	1.3782	5	1.3782	1.3782	1.3782	1.3782
584	70596	VW3789	125637	2010	2603	2	10	26	W9A10YANA	3477	40	45	2	3	RFD	2.1454	g/100g	30/10/10 Lucerne	LAST	W9A10YANA_RFD	0.5	17	4.570754717	-3.811320755	YANA	1	NA	2.1454	2.1454	2.1454	2.1454	3	2.1454	2.1454	NA	2.1454	2.1454	2.1454	4	2.1454	2.1454	2.1454	NA	2.1454	2	2.1454	NA	2.1454	2.1454
585	70597	VW1193	124077	2010	2074	2	10	27	W9A10YANA	1917	22	69	2	4	IRR	1.6115	g/100g	30/10/10 Lucerne	LAST	W9A10YANA_IRR	24.5	-1	4.570754717	-3.811320755	YANA	4	1.6115	1.6115	1.6115	NA	1.6115	1	NA	1.6115	1.6115	1.6115	1.6115	1.6115	3	1.6115	1.6115	NA	1.6115	1.6115	3	1.6115	1.6115	NA	1.6115
586	70598	YENDA	125804	2010	2659	2	10	28	W9A10YANA	3644	42	36	1	2	RFD	1.7996	g/100g	23/10/10 Hurricane	LAST	W9A10YANA_RFD	-8.5	19	4.570754717	-3.811320755	YANA	5	1.7996	1.7996	1.7996	1.7996	NA	4	1.7996	1.7996	1.7996	NA	1.7996	1.7996	2	1.7996	NA	1.7996	1.7996	1.7996	1	NA	1.7996	1.7996	1.7996
587	70600	WW18569	121726	2010	1229	2	10	30	W9A10COLE	3518	47	22	2	4	IRR	0.68688	g/100g	27/10/10 Lucerne	LAST	W9A10COLE_IRR	-16.5	20.5	4.570754717	-3.811320755	COLE	5	0.68688	0.68688	0.68688	0.68688	NA	2	0.68688	NA	0.68688	0.68688	0.68688	0.68688	1	NA	0.68688	0.68688	0.68688	0.68688	5	0.68688	0.68688	0.68688	0.68688
588	70601	PAVON_DWARF	121982	2010	1323	3	1	1	W9A10COLE	3774	50	50	2	4	IRR	1.5892	g/100g	27/10/10 Lucerne	LAST	W9A10COLE_IRR	11.5	23.5	-4.429245283	-2.811320755	COLE	3	1.5892	1.5892	NA	1.5892	1.5892	2	1.5892	NA	1.5892	1.5892	1.5892	1.5892	1	NA	1.5892	1.5892	1.5892	1.5892	5	1.5892	1.5892	1.5892	1.5892
589	70602	WYLAH	119094	2010	300	3	1	2	W9A10COLE	886	12	50	1	1	IRR	1.2961	g/100g	12/10/2010	LAST	W9A10COLE_IRR	11.5	-14.5	-4.429245283	-2.811320755	COLE	5	1.2961	1.2961	1.2961	1.2961	NA	4	1.2961	1.2961	1.2961	NA	1.2961	1.2961	4	1.2961	1.2961	1.2961	NA	1.2961	1	NA	1.2961	1.2961	1.2961
590	70603	WW19733	125949	2010	2716	3	1	3	W9A10YANA	3789	44	5	1	1	IRR	1.7545	g/100g	23/10/10 Lucerne	LAST	W9A10YANA_IRR	-39.5	21	-4.429245283	-2.811320755	YANA	5	1.7545	1.7545	1.7545	1.7545	NA	1	NA	1.7545	1.7545	1.7545	1.7545	1.7545	1	NA	1.7545	1.7545	1.7545	1.7545	4	1.7545	1.7545	1.7545	NA
591	70604	EGA_EAGLEHAWK	119096	2010	301	3	1	4	W9A10COLE	888	12	52	1	1	IRR	1.1609	g/100g	12/10/2010	LAST	W9A10COLE_IRR	13.5	-14.5	-4.429245283	-2.811320755	COLE	4	1.1609	1.1609	1.1609	NA	1.1609	5	1.1609	1.1609	1.1609	1.1609	NA	1.1609	5	1.1609	1.1609	1.1609	1.1609	NA	3	1.1609	1.1609	NA	1.1609
592	70605	WW19525	120332	2010	738	3	1	5	W9A10COLE	2124	28	72	2	3	RFD	2.0831	g/100g	27/10/10 Lucerne	LAST	W9A10COLE_RFD	33.5	1.5	-4.429245283	-2.811320755	COLE	1	NA	2.0831	2.0831	2.0831	2.0831	4	2.0831	2.0831	2.0831	NA	2.0831	2.0831	2	2.0831	NA	2.0831	2.0831	2.0831	5	2.0831	2.0831	2.0831	2.0831
593	70606	HRZ06_0270	124121	2010	2089	3	1	6	W9A10YANA	1961	23	25	1	2	RFD	2.0023	g/100g	23/10/10 Hurricane	LAST	W9A10YANA_RFD	-19.5	0	-4.429245283	-2.811320755	YANA	2	2.0023	NA	2.0023	2.0023	2.0023	2	2.0023	NA	2.0023	2.0023	2.0023	2.0023	4	2.0023	2.0023	2.0023	NA	2.0023	5	2.0023	2.0023	2.0023	2.0023
594	70607	HRZ04_0425	119503	2010	476	3	1	7	W9A10COLE	1295	18	3	1	2	RFD	1.3462	g/100g	19/10/2010	LAST	W9A10COLE_RFD	-35.5	-8.5	-4.429245283	-2.811320755	COLE	4	1.3462	1.3462	1.3462	NA	1.3462	2	1.3462	NA	1.3462	1.3462	1.3462	1.3462	2	1.3462	NA	1.3462	1.3462	1.3462	2	1.3462	NA	1.3462	1.3462
595	70608	SUN530D	124616	2010	2256	3	1	8	W9A10YANA	2456	28	80	2	4	IRR	1.0437	g/100g	30/10/10 Lucerne	LAST	W9A10YANA_IRR	35.5	5	-4.429245283	-2.811320755	YANA	2	1.0437	NA	1.0437	1.0437	1.0437	5	1.0437	1.0437	1.0437	1.0437	NA	1.0437	4	1.0437	1.0437	1.0437	NA	1.0437	2	1.0437	NA	1.0437	1.0437
596	70609	WW19684	124781	2010	2301	3	1	9	W9A10YANA	2621	30	69	2	4	IRR	1.6959	g/100g	30/10/10 Lucerne	LAST	W9A10YANA_IRR	24.5	7	-4.429245283	-2.811320755	YANA	5	1.6959	1.6959	1.6959	1.6959	NA	2	1.6959	NA	1.6959	1.6959	1.6959	1.6959	5	1.6959	1.6959	1.6959	1.6959	NA	2	1.6959	NA	1.6959	1.6959
597	70610	WW21842	123982	2010	2035	3	1	10	W9A10YANA	1822	21	62	2	3	RFD	1.6647	g/100g	30/10/10 Lucerne	BACKWARDS	W9A10YANA_RFD	17.5	-2	-4.429245283	-2.811320755	YANA	1	NA	1.6647	1.6647	1.6647	1.6647	3	1.6647	1.6647	NA	1.6647	1.6647	1.6647	5	1.6647	1.6647	1.6647	1.6647	NA	3	1.6647	1.6647	NA	1.6647
598	70611	HRZ04_0513	119342	2010	421	3	1	11	W9A10COLE	1134	15	70	1	2	RFD	1.8147	g/100g	12/10/2010	LAST	W9A10COLE_RFD	31.5	-11.5	-4.429245283	-2.811320755	COLE	2	1.8147	NA	1.8147	1.8147	1.8147	1	NA	1.8147	1.8147	1.8147	1.8147	1.8147	2	1.8147	NA	1.8147	1.8147	1.8147	3	1.8147	1.8147	NA	1.8147
599	70612	WW20680	124433	2010	2199	3	1	12	W9A10YANA	2273	26	73	2	4	IRR	1.6355	g/100g	30/10/10 Lucerne	LAST	W9A10YANA_IRR	28.5	3	-4.429245283	-2.811320755	YANA	2	1.6355	NA	1.6355	1.6355	1.6355	5	1.6355	1.6355	1.6355	1.6355	NA	1.6355	5	1.6355	1.6355	1.6355	1.6355	NA	2	1.6355	NA	1.6355	1.6355
600	70613	HRZ04_0354	120584	2010	814	3	1	13	W9A10COLE	2376	32	20	2	3	RFD	2.1996	g/100g	27/10/10 Lucerne	LAST	W9A10COLE_RFD	-18.5	5.5	-4.429245283	-2.811320755	COLE	2	2.1996	NA	2.1996	2.1996	2.1996	4	2.1996	2.1996	2.1996	NA	2.1996	2.1996	5	2.1996	2.1996	2.1996	2.1996	NA	2	2.1996	NA	2.1996	2.1996
601	70614	VW4355	120312	2010	733	3	1	14	W9A10COLE	2104	28	52	2	3	RFD	1.9391	g/100g	27/10/10 Lucerne	LAST	W9A10COLE_RFD	13.5	1.5	-4.429245283	-2.811320755	COLE	4	1.9391	1.9391	1.9391	NA	1.9391	4	1.9391	1.9391	1.9391	NA	1.9391	1.9391	5	1.9391	1.9391	1.9391	1.9391	NA	1	NA	1.9391	1.9391	1.9391
602	70615	AUS33466	119479	2010	468	3	1	15	W9A10COLE	1271	17	55	1	2	RFD	2.0264	g/100g	12/10/2010	LAST	W9A10COLE_RFD	16.5	-9.5	-4.429245283	-2.811320755	COLE	1	NA	2.0264	2.0264	2.0264	2.0264	1	NA	2.0264	2.0264	2.0264	2.0264	2.0264	4	2.0264	2.0264	2.0264	NA	2.0264	4	2.0264	2.0264	2.0264	NA
603	70616	EGA_GREGORY	119311	2010	409	3	1	16	W9A10COLE	1103	15	39	1	2	RFD	1.3848	g/100g	12/10/2010	LAST	W9A10COLE_RFD	0.5	-11.5	-4.429245283	-2.811320755	COLE	2	1.3848	NA	1.3848	1.3848	1.3848	4	1.3848	1.3848	1.3848	NA	1.3848	1.3848	5	1.3848	1.3848	1.3848	1.3848	NA	4	1.3848	1.3848	1.3848	NA
604	70617	VW4192	125264	2010	2477	3	1	17	W9A10YANA	3104	36	24	1	2	RFD	2.3639	g/100g	23/10/10 Hurricane	LAST	W9A10YANA_RFD	-20.5	13	-4.429245283	-2.811320755	YANA	2	2.3639	NA	2.3639	2.3639	2.3639	1	NA	2.3639	2.3639	2.3639	2.3639	2.3639	2	2.3639	NA	2.3639	2.3639	2.3639	2	2.3639	NA	2.3639	2.3639
605	70618	DRYSDALE	124234	2010	2126	3	1	18	W9A10YANA	2074	24	50	2	3	RFD	1.9494	g/100g	30/10/10 Lucerne	LAST	W9A10YANA_RFD	5.5	1	-4.429245283	-2.811320755	YANA	2	1.9494	NA	1.9494	1.9494	1.9494	3	1.9494	1.9494	NA	1.9494	1.9494	1.9494	4	1.9494	1.9494	1.9494	NA	1.9494	2	1.9494	NA	1.9494	1.9494
606	70619	HRZ06_0270	121878	2010	1286	3	1	19	W9A10COLE	3670	49	22	2	4	IRR	1.3223	g/100g	27/10/10 Lucerne	LAST	W9A10COLE_IRR	-16.5	22.5	-4.429245283	-2.811320755	COLE	2	1.3223	NA	1.3223	1.3223	1.3223	2	1.3223	NA	1.3223	1.3223	1.3223	1.3223	4	1.3223	1.3223	1.3223	NA	1.3223	5	1.3223	1.3223	1.3223	1.3223
607	70620	WW19954	123154	2010	1745	3	1	20	W9A10YANA	994	12	26	1	2	RFD	2.2484	g/100g	23/10/10 Hurricane	LAST	W9A10YANA_RFD	-18.5	-11	-4.429245283	-2.811320755	YANA	2	2.2484	NA	2.2484	2.2484	2.2484	5	2.2484	2.2484	2.2484	2.2484	NA	2.2484	4	2.2484	2.2484	2.2484	NA	2.2484	3	2.2484	2.2484	NA	2.2484
608	70621	WW3028_4	121050	2010	1005	3	1	21	W9A10COLE	2842	38	30	2	3	RFD	2.2503	g/100g	27/10/10 Lucerne	LAST	W9A10COLE_RFD	-8.5	11.5	-4.429245283	-2.811320755	COLE	3	2.2503	2.2503	NA	2.2503	2.2503	5	2.2503	2.2503	2.2503	2.2503	NA	2.2503	5	2.2503	2.2503	2.2503	2.2503	NA	5	2.2503	2.2503	2.2503	2.2503
609	70622	HRZ06_2082	125643	2010	2607	3	1	22	W9A10YANA	3483	40	51	2	3	RFD	2.2412	g/100g	30/10/10 Lucerne	LAST	W9A10YANA_RFD	6.5	17	-4.429245283	-2.811320755	YANA	4	2.2412	2.2412	2.2412	NA	2.2412	1	NA	2.2412	2.2412	2.2412	2.2412	2.2412	4	2.2412	2.2412	2.2412	NA	2.2412	4	2.2412	2.2412	2.2412	NA
610	70623	HRZ06_0488	118354	2010	42	3	1	23	W9A10COLE	146	2	70	1	1	IRR	1.9749	g/100g	19/10/2010	LAST	W9A10COLE_IRR	31.5	-24.5	-4.429245283	-2.811320755	COLE	3	1.9749	1.9749	NA	1.9749	1.9749	2	1.9749	NA	1.9749	1.9749	1.9749	1.9749	2	1.9749	NA	1.9749	1.9749	1.9749	4	1.9749	1.9749	1.9749	NA
611	70624	DERRIMUT	122927	2010	1662	3	1	24	W9A10YANA	767	9	63	2	3	RFD	1.786	g/100g	30/10/10 Lucerne	LAST	W9A10YANA_RFD	18.5	-14	-4.429245283	-2.811320755	YANA	4	1.786	1.786	1.786	NA	1.786	5	1.786	1.786	1.786	1.786	NA	1.786	4	1.786	1.786	1.786	NA	1.786	3	1.786	1.786	NA	1.786
612	70625	WW20096	119568	2010	493	3	1	25	W9A10COLE	1360	18	68	1	2	RFD	1.5138	g/100g	19/10/2010	LAST	W9A10COLE_RFD	29.5	-8.5	-4.429245283	-2.811320755	COLE	2	1.5138	NA	1.5138	1.5138	1.5138	2	1.5138	NA	1.5138	1.5138	1.5138	1.5138	1	NA	1.5138	1.5138	1.5138	1.5138	1	NA	1.5138	1.5138	1.5138
613	70626	RAC1505	123978	2010	2033	3	1	26	W9A10YANA	1818	21	58	2	3	RFD	2.1965	g/100g	30/10/10 Lucerne	LAST	W9A10YANA_RFD	13.5	-2	-4.429245283	-2.811320755	YANA	2	2.1965	NA	2.1965	2.1965	2.1965	4	2.1965	2.1965	2.1965	NA	2.1965	2.1965	2	2.1965	NA	2.1965	2.1965	2.1965	1	NA	2.1965	2.1965	2.1965
614	70627	133513_133	123126	2010	1736	3	1	27	W9A10YANA	966	11	86	2	4	IRR	2.1619	g/100g	30/10/10 Hurricane	LAST	W9A10YANA_IRR	41.5	-12	-4.429245283	-2.811320755	YANA	3	2.1619	2.1619	NA	2.1619	2.1619	4	2.1619	2.1619	2.1619	NA	2.1619	2.1619	2	2.1619	NA	2.1619	2.1619	2.1619	1	NA	2.1619	2.1619	2.1619
615	70628	VW1152	119246	2010	374	3	1	28	W9A10COLE	1038	14	50	1	2	RFD	2.6244	g/100g	12/10/2010	LAST	W9A10COLE_RFD	11.5	-12.5	-4.429245283	-2.811320755	COLE	1	NA	2.6244	2.6244	2.6244	2.6244	4	2.6244	2.6244	2.6244	NA	2.6244	2.6244	2	2.6244	NA	2.6244	2.6244	2.6244	5	2.6244	2.6244	2.6244	2.6244
616	70629	114892_109	125119	2010	2427	3	1	29	W9A10YANA	2959	34	55	2	3	RFD	2.0822	g/100g	30/10/10 Lucerne	LAST	W9A10YANA_RFD	10.5	11	-4.429245283	-2.811320755	YANA	1	NA	2.0822	2.0822	2.0822	2.0822	3	2.0822	2.0822	NA	2.0822	2.0822	2.0822	5	2.0822	2.0822	2.0822	2.0822	NA	5	2.0822	2.0822	2.0822	2.0822
617	70630	VW0760	122987	2010	1686	3	1	30	W9A10YANA	827	10	35	1	2	RFD	2.1455	g/100g	23/10/10 Hurricane	LAST	W9A10YANA_RFD	-9.5	-13	-4.429245283	-2.811320755	YANA	4	2.1455	2.1455	2.1455	NA	2.1455	2	2.1455	NA	2.1455	2.1455	2.1455	2.1455	1	NA	2.1455	2.1455	2.1455	2.1455	3	2.1455	2.1455	NA	2.1455
618	70631	HRZ06_0053	121272	2010	1065	3	2	1	W9A10COLE	3064	41	24	2	4	IRR	1.3193	g/100g	27/10/10 Lucerne	LAST	W9A10COLE_IRR	-14.5	14.5	-3.429245283	-2.811320755	COLE	4	1.3193	1.3193	1.3193	NA	1.3193	3	1.3193	1.3193	NA	1.3193	1.3193	1.3193	4	1.3193	1.3193	1.3193	NA	1.3193	4	1.3193	1.3193	1.3193	NA
619	70632	EGA_WEDGETAIL	124346	2010	2165	3	2	2	W9A10YANA	2186	25	74	2	4	IRR	1.647	g/100g	30/10/10 Lucerne	LAST	W9A10YANA_IRR	29.5	2	-3.429245283	-2.811320755	YANA	5	1.647	1.647	1.647	1.647	NA	3	1.647	1.647	NA	1.647	1.647	1.647	5	1.647	1.647	1.647	1.647	NA	3	1.647	1.647	NA	1.647
620	70633	HRZ06_0145	123402	2010	1834	3	2	3	W9A10YANA	1242	15	10	1	1	IRR	2.5264	g/100g	23/10/10 Hurricane	LAST	W9A10YANA_IRR	-34.5	-8	-3.429245283	-2.811320755	YANA	3	2.5264	2.5264	NA	2.5264	2.5264	3	2.5264	2.5264	NA	2.5264	2.5264	2.5264	2	2.5264	NA	2.5264	2.5264	2.5264	5	2.5264	2.5264	2.5264	2.5264
621	70634	SUN571B	118945	2010	238	3	2	4	W9A10COLE	737	10	53	1	1	IRR	1.4514	g/100g	19/10/2010	LAST	W9A10COLE_IRR	14.5	-16.5	-3.429245283	-2.811320755	COLE	5	1.4514	1.4514	1.4514	1.4514	NA	3	1.4514	1.4514	NA	1.4514	1.4514	1.4514	5	1.4514	1.4514	1.4514	1.4514	NA	3	1.4514	1.4514	NA	1.4514
622	70635	VU3750	119744	2010	547	3	2	5	W9A10COLE	1536	21	16	1	2	RFD	2.3416	g/100g	12/10/2010	LAST	W9A10COLE_RFD	-22.5	-5.5	-3.429245283	-2.811320755	COLE	2	2.3416	NA	2.3416	2.3416	2.3416	1	NA	2.3416	2.3416	2.3416	2.3416	2.3416	2	2.3416	NA	2.3416	2.3416	2.3416	4	2.3416	2.3416	2.3416	NA
623	70636	SUN534D	119726	2010	540	3	2	6	W9A10COLE	1518	20	74	1	2	RFD	1.5854	g/100g	12/10/2010	LAST	W9A10COLE_RFD	35.5	-6.5	-3.429245283	-2.811320755	COLE	3	1.5854	1.5854	NA	1.5854	1.5854	2	1.5854	NA	1.5854	1.5854	1.5854	1.5854	1	NA	1.5854	1.5854	1.5854	1.5854	1	NA	1.5854	1.5854	1.5854
624	70637	WW20068	124592	2010	2245	3	2	7	W9A10YANA	2432	28	56	2	3	RFD	1.5703	g/100g	30/10/10 Lucerne	LAST	W9A10YANA_RFD	11.5	5	-3.429245283	-2.811320755	YANA	3	1.5703	1.5703	NA	1.5703	1.5703	1	NA	1.5703	1.5703	1.5703	1.5703	1.5703	1	NA	1.5703	1.5703	1.5703	1.5703	2	1.5703	NA	1.5703	1.5703
625	70638	HRZ06_0292	125381	2010	2520	3	2	8	W9A10YANA	3221	37	53	2	3	RFD	2.0986	g/100g	30/10/10 Hurricane	LAST	W9A10YANA_RFD	8.5	14	-3.429245283	-2.811320755	YANA	4	2.0986	2.0986	2.0986	NA	2.0986	2	2.0986	NA	2.0986	2.0986	2.0986	2.0986	1	NA	2.0986	2.0986	2.0986	2.0986	4	2.0986	2.0986	2.0986	NA
626	70639	VW0318	123224	2010	1776	3	2	9	W9A10YANA	1064	13	8	1	1	IRR	1.6972	g/100g	23/10/10 Lucerne	LAST	W9A10YANA_IRR	-36.5	-10	-3.429245283	-2.811320755	YANA	5	1.6972	1.6972	1.6972	1.6972	NA	3	1.6972	1.6972	NA	1.6972	1.6972	1.6972	1	NA	1.6972	1.6972	1.6972	1.6972	2	1.6972	NA	1.6972	1.6972
627	70640	WW19665	121196	2010	1047	3	2	10	W9A10COLE	2988	40	24	2	4	IRR	1.141	g/100g	27/10/10 Lucerne	LAST	W9A10COLE_IRR	-14.5	13.5	-3.429245283	-2.811320755	COLE	5	1.141	1.141	1.141	1.141	NA	1	NA	1.141	1.141	1.141	1.141	1.141	3	1.141	1.141	NA	1.141	1.141	2	1.141	NA	1.141	1.141
628	70641	LPB04_2386_1302	124782	2010	2302	3	2	11	W9A10YANA	2622	30	70	2	4	IRR	2.4076	g/100g	30/10/10 Hurricane	LAST	W9A10YANA_IRR	25.5	7	-3.429245283	-2.811320755	YANA	3	2.4076	2.4076	NA	2.4076	2.4076	1	NA	2.4076	2.4076	2.4076	2.4076	2.4076	3	2.4076	2.4076	NA	2.4076	2.4076	1	NA	2.4076	2.4076	2.4076
629	70642	WW21859	121530	2010	1168	3	2	12	W9A10COLE	3322	44	54	2	4	IRR	1.4938	g/100g	27/10/10 Lucerne	LAST	W9A10COLE_IRR	15.5	17.5	-3.429245283	-2.811320755	COLE	5	1.4938	1.4938	1.4938	1.4938	NA	5	1.4938	1.4938	1.4938	1.4938	NA	1.4938	4	1.4938	1.4938	1.4938	NA	1.4938	5	1.4938	1.4938	1.4938	1.4938
630	70643	WW20667	118596	2010	128	3	2	13	W9A10COLE	388	6	8	1	1	IRR	2.6418	g/100g	12/10/2010	LAST	W9A10COLE_IRR	-30.5	-20.5	-3.429245283	-2.811320755	COLE	2	2.6418	NA	2.6418	2.6418	2.6418	2	2.6418	NA	2.6418	2.6418	2.6418	2.6418	4	2.6418	2.6418	2.6418	NA	2.6418	5	2.6418	2.6418	2.6418	2.6418
631	70644	VT1308	124623	2010	2257	3	2	14	W9A10YANA	2463	28	87	2	4	IRR	1.4764	g/100g	30/10/10 Lucerne	LAST	W9A10YANA_IRR	42.5	5	-3.429245283	-2.811320755	YANA	2	1.4764	NA	1.4764	1.4764	1.4764	5	1.4764	1.4764	1.4764	1.4764	NA	1.4764	3	1.4764	1.4764	NA	1.4764	1.4764	3	1.4764	1.4764	NA	1.4764
632	70645	WW14311	125967	2010	2725	3	2	15	W9A10YANA	3807	44	23	1	2	RFD	3.032	g/100g	23/10/10 Hurricane	LAST	W9A10YANA_RFD	-21.5	21	-3.429245283	-2.811320755	YANA	3	3.032	3.032	NA	3.032	3.032	3	3.032	3.032	NA	3.032	3.032	3.032	4	3.032	3.032	3.032	NA	3.032	3	3.032	3.032	NA	3.032
633	70646	SENTINEL	122720	2010	1586	3	2	16	W9A10YANA	560	7	32	1	2	RFD	2.2561	g/100g	23/10/10 Hurricane	LAST	W9A10YANA_RFD	-12.5	-16	-3.429245283	-2.811320755	YANA	3	2.2561	2.2561	NA	2.2561	2.2561	4	2.2561	2.2561	2.2561	NA	2.2561	2.2561	2	2.2561	NA	2.2561	2.2561	2.2561	3	2.2561	2.2561	NA	2.2561
634	70647	HRZ06_0141	121280	2010	1070	3	2	17	W9A10COLE	3072	41	32	2	4	IRR	1.6343	g/100g	27/10/10 Lucerne	LAST	W9A10COLE_IRR	-6.5	14.5	-3.429245283	-2.811320755	COLE	3	1.6343	1.6343	NA	1.6343	1.6343	3	1.6343	1.6343	NA	1.6343	1.6343	1.6343	4	1.6343	1.6343	1.6343	NA	1.6343	1	NA	1.6343	1.6343	1.6343
635	70648	CRUSADER	122167	2010	1391	3	2	18	W9A10YANA	7	1	7	1	1	IRR	2.08	g/100g	23/10/10 Lucerne	LAST	W9A10YANA_IRR	-37.5	-22	-3.429245283	-2.811320755	YANA	2	2.08	NA	2.08	2.08	2.08	1	NA	2.08	2.08	2.08	2.08	2.08	4	2.08	2.08	2.08	NA	2.08	2	2.08	NA	2.08	2.08
636	70649	WW16259	122617	2010	1553	3	2	19	W9A10YANA	457	6	17	1	1	IRR	2.1537	g/100g	23/10/10 Lucerne	LAST	W9A10YANA_IRR	-27.5	-17	-3.429245283	-2.811320755	YANA	2	2.1537	NA	2.1537	2.1537	2.1537	5	2.1537	2.1537	2.1537	2.1537	NA	2.1537	5	2.1537	2.1537	2.1537	2.1537	NA	4	2.1537	2.1537	2.1537	NA
637	70650	WEEBILL1	122048	2010	1347	3	2	20	W9A10COLE	3840	51	40	2	4	IRR	1.6275	g/100g	27/10/10 Lucerne	LAST	W9A10COLE_IRR	1.5	24.5	-3.429245283	-2.811320755	COLE	2	1.6275	NA	1.6275	1.6275	1.6275	3	1.6275	1.6275	NA	1.6275	1.6275	1.6275	2	1.6275	NA	1.6275	1.6275	1.6275	5	1.6275	1.6275	1.6275	1.6275
638	70651	HRZ06_0145	119766	2010	557	3	2	21	W9A10COLE	1558	21	38	1	2	RFD	1.9142	g/100g	12/10/2010	LAST	W9A10COLE_RFD	-0.5	-5.5	-3.429245283	-2.811320755	COLE	3	1.9142	1.9142	NA	1.9142	1.9142	3	1.9142	1.9142	NA	1.9142	1.9142	1.9142	2	1.9142	NA	1.9142	1.9142	1.9142	5	1.9142	1.9142	1.9142	1.9142
639	70652	VW1286	122715	2010	1585	3	2	22	W9A10YANA	555	7	27	1	2	RFD	2.1139	g/100g	23/10/10 Lucerne	LAST	W9A10YANA_RFD	-17.5	-16	-3.429245283	-2.811320755	YANA	3	2.1139	2.1139	NA	2.1139	2.1139	5	2.1139	2.1139	2.1139	2.1139	NA	2.1139	3	2.1139	2.1139	NA	2.1139	2.1139	4	2.1139	2.1139	2.1139	NA
640	70653	IRENA/BABAX//PASTOR	119344	2010	422	3	2	23	W9A10COLE	1136	15	72	1	2	RFD	1.1922	g/100g	19/10/2010	LAST	W9A10COLE_RFD	33.5	-11.5	-3.429245283	-2.811320755	COLE	5	1.1922	1.1922	1.1922	1.1922	NA	1	NA	1.1922	1.1922	1.1922	1.1922	1.1922	2	1.1922	NA	1.1922	1.1922	1.1922	2	1.1922	NA	1.1922	1.1922
641	70654	WW13773	124957	2010	2369	3	2	24	W9A10YANA	2797	32	69	2	4	IRR	1.8424	g/100g	30/10/10 Lucerne	LAST	W9A10YANA_IRR	24.5	9	-3.429245283	-2.811320755	YANA	1	NA	1.8424	1.8424	1.8424	1.8424	1	NA	1.8424	1.8424	1.8424	1.8424	1.8424	4	1.8424	1.8424	1.8424	NA	1.8424	4	1.8424	1.8424	1.8424	NA
642	70655	WW21573	118774	2010	180	3	2	25	W9A10COLE	566	8	34	1	1	IRR	1.7112	g/100g	19/10/2010	LAST	W9A10COLE_IRR	-4.5	-18.5	-3.429245283	-2.811320755	COLE	1	NA	1.7112	1.7112	1.7112	1.7112	1	NA	1.7112	1.7112	1.7112	1.7112	1.7112	5	1.7112	1.7112	1.7112	1.7112	NA	5	1.7112	1.7112	1.7112	1.7112
643	70656	PASTOR	119972	2010	627	3	2	26	W9A10COLE	1764	24	16	1	2	RFD	2.1115	g/100g	19/10/2010	LAST	W9A10COLE_RFD	-22.5	-2.5	-3.429245283	-2.811320755	COLE	1	NA	2.1115	2.1115	2.1115	2.1115	1	NA	2.1115	2.1115	2.1115	2.1115	2.1115	3	2.1115	2.1115	NA	2.1115	2.1115	4	2.1115	2.1115	2.1115	NA
644	70657	IRENA/BABAX//PASTOR	118361	2010	44	3	2	27	W9A10COLE	153	3	1	1	1	IRR	0.82788	g/100g	23/10/10 Lucerne	LAST	W9A10COLE_IRR	-37.5	-23.5	-3.429245283	-2.811320755	COLE	5	0.82788	0.82788	0.82788	0.82788	NA	1	NA	0.82788	0.82788	0.82788	0.82788	0.82788	2	0.82788	NA	0.82788	0.82788	0.82788	2	0.82788	NA	0.82788	0.82788
645	70658	QT13626	122351	2010	1460	3	2	28	W9A10YANA	191	3	15	1	1	IRR	1.8904	g/100g	23/10/10 Hurricane	LAST	W9A10YANA_IRR	-29.5	-20	-3.429245283	-2.811320755	YANA	1	NA	1.8904	1.8904	1.8904	1.8904	1	NA	1.8904	1.8904	1.8904	1.8904	1.8904	2	1.8904	NA	1.8904	1.8904	1.8904	3	1.8904	1.8904	NA	1.8904
646	70659	WI25099	122254	2010	1423	3	2	29	W9A10YANA	94	2	6	1	1	IRR	2.252	g/100g	23/10/10 Lucerne	LAST	W9A10YANA_IRR	-38.5	-21	-3.429245283	-2.811320755	YANA	2	2.252	NA	2.252	2.252	2.252	1	NA	2.252	2.252	2.252	2.252	2.252	2	2.252	NA	2.252	2.252	2.252	1	NA	2.252	2.252	2.252
647	70660	EGA_WILLS	122223	2010	1409	3	2	30	W9A10YANA	63	1	63	2	3	RFD	2.1869	g/100g	30/10/10 Lucerne	LAST	W9A10YANA_RFD	18.5	-22	-3.429245283	-2.811320755	YANA	3	2.1869	2.1869	NA	2.1869	2.1869	1	NA	2.1869	2.1869	2.1869	2.1869	2.1869	5	2.1869	2.1869	2.1869	2.1869	NA	2	2.1869	NA	2.1869	2.1869
648	70661	WW3028_4	119627	2010	510	3	3	1	W9A10COLE	1419	19	51	1	2	RFD	1.9096	g/100g	12/10/2010	LAST	W9A10COLE_RFD	12.5	-7.5	-2.429245283	-2.811320755	COLE	3	1.9096	1.9096	NA	1.9096	1.9096	5	1.9096	1.9096	1.9096	1.9096	NA	1.9096	5	1.9096	1.9096	1.9096	1.9096	NA	5	1.9096	1.9096	1.9096	1.9096
649	70662	WW19754	124358	2010	2171	3	3	2	W9A10YANA	2198	25	86	2	4	IRR	1.7707	g/100g	30/10/10 Lucerne	LAST	W9A10YANA_IRR	41.5	2	-2.429245283	-2.811320755	YANA	1	NA	1.7707	1.7707	1.7707	1.7707	5	1.7707	1.7707	1.7707	1.7707	NA	1.7707	2	1.7707	NA	1.7707	1.7707	1.7707	1	NA	1.7707	1.7707	1.7707
650	70663	VW0395	120925	2010	943	3	3	3	W9A10COLE	2717	36	57	2	3	RFD	2.2163	g/100g	27/10/10 Lucerne	LAST	W9A10COLE_RFD	18.5	9.5	-2.429245283	-2.811320755	COLE	2	2.2163	NA	2.2163	2.2163	2.2163	4	2.2163	2.2163	2.2163	NA	2.2163	2.2163	4	2.2163	2.2163	2.2163	NA	2.2163	3	2.2163	2.2163	NA	2.2163
651	70664	WW13735	125372	2010	2517	3	3	4	W9A10YANA	3212	37	44	1	2	RFD	2.6212	g/100g	23/10/10 Hurricane	LAST	W9A10YANA_RFD	-0.5	14	-2.429245283	-2.811320755	YANA	1	NA	2.6212	2.6212	2.6212	2.6212	2	2.6212	NA	2.6212	2.6212	2.6212	2.6212	1	NA	2.6212	2.6212	2.6212	2.6212	5	2.6212	2.6212	2.6212	2.6212
652	70665	VW2705	121892	2010	1292	3	3	5	W9A10COLE	3684	49	36	2	4	IRR	2.0741	g/100g	27/10/10 Lucerne	LAST	W9A10COLE_IRR	-2.5	22.5	-2.429245283	-2.811320755	COLE	5	2.0741	2.0741	2.0741	2.0741	NA	2	2.0741	NA	2.0741	2.0741	2.0741	2.0741	2	2.0741	NA	2.0741	2.0741	2.0741	1	NA	2.0741	2.0741	2.0741
653	70666	HRZ06_0067	124135	2010	2094	3	3	6	W9A10YANA	1975	23	39	1	2	RFD	2.0297	g/100g	23/10/10 Hurricane	LAST	W9A10YANA_RFD	-5.5	0	-2.429245283	-2.811320755	YANA	1	NA	2.0297	2.0297	2.0297	2.0297	3	2.0297	2.0297	NA	2.0297	2.0297	2.0297	1	NA	2.0297	2.0297	2.0297	2.0297	4	2.0297	2.0297	2.0297	NA
654	70668	WW19743	125608	2010	2595	3	3	8	W9A10YANA	3448	40	16	1	1	IRR	1.4512	g/100g	23/10/10 Lucerne	LAST	W9A10YANA_IRR	-28.5	17	-2.429245283	-2.811320755	YANA	5	1.4512	1.4512	1.4512	1.4512	NA	3	1.4512	1.4512	NA	1.4512	1.4512	1.4512	2	1.4512	NA	1.4512	1.4512	1.4512	3	1.4512	1.4512	NA	1.4512
655	70669	WI25053	120427	2010	765	3	3	9	W9A10COLE	2219	30	15	2	3	RFD	2.2784	g/100g	27/10/10 Lucerne	LAST	W9A10COLE_RFD	-23.5	3.5	-2.429245283	-2.811320755	COLE	2	2.2784	NA	2.2784	2.2784	2.2784	1	NA	2.2784	2.2784	2.2784	2.2784	2.2784	5	2.2784	2.2784	2.2784	2.2784	NA	3	2.2784	2.2784	NA	2.2784
656	70670	HRZ06_2202	121850	2010	1278	3	3	10	W9A10COLE	3642	48	70	2	4	IRR	2.1709	g/100g	27/10/10 Lucerne	LAST	W9A10COLE_IRR	31.5	21.5	-2.429245283	-2.811320755	COLE	2	2.1709	NA	2.1709	2.1709	2.1709	5	2.1709	2.1709	2.1709	2.1709	NA	2.1709	1	NA	2.1709	2.1709	2.1709	2.1709	3	2.1709	2.1709	NA	2.1709
657	70671	VW2324	124449	2010	2202	3	3	11	W9A10YANA	2289	27	1	1	1	IRR	2.1678	g/100g	23/10/10 Lucerne	LAST	W9A10YANA_IRR	-43.5	4	-2.429245283	-2.811320755	YANA	4	2.1678	2.1678	2.1678	NA	2.1678	3	2.1678	2.1678	NA	2.1678	2.1678	2.1678	5	2.1678	2.1678	2.1678	2.1678	NA	1	NA	2.1678	2.1678	2.1678
658	70672	H45	119131	2010	317	3	3	12	W9A10COLE	923	13	11	1	1	IRR	2.1633	g/100g	19/10/2010	LAST	W9A10COLE_IRR	-27.5	-13.5	-2.429245283	-2.811320755	COLE	1	NA	2.1633	2.1633	2.1633	2.1633	3	2.1633	2.1633	NA	2.1633	2.1633	2.1633	5	2.1633	2.1633	2.1633	2.1633	NA	5	2.1633	2.1633	2.1633	2.1633
659	70673	LPB03_1109	120926	2010	944	3	3	13	W9A10COLE	2718	36	58	2	3	RFD	1.454	g/100g	27/10/10 Lucerne	LAST	W9A10COLE_RFD	19.5	9.5	-2.429245283	-2.811320755	COLE	1	NA	1.454	1.454	1.454	1.454	5	1.454	1.454	1.454	1.454	NA	1.454	4	1.454	1.454	1.454	NA	1.454	1	NA	1.454	1.454	1.454
660	70674	VW0318	122460	2010	1496	3	3	14	W9A10YANA	300	4	36	1	2	RFD	2.1867	g/100g	23/10/10 Lucerne	LAST	W9A10YANA_RFD	-8.5	-19	-2.429245283	-2.811320755	YANA	5	2.1867	2.1867	2.1867	2.1867	NA	3	2.1867	2.1867	NA	2.1867	2.1867	2.1867	1	NA	2.1867	2.1867	2.1867	2.1867	2	2.1867	NA	2.1867	2.1867
661	70675	WW18784	118352	2010	40	3	3	15	W9A10COLE	144	2	68	1	1	IRR	1.5035	g/100g	19/10/2010	LAST	W9A10COLE_IRR	29.5	-24.5	-2.429245283	-2.811320755	COLE	2	1.5035	NA	1.5035	1.5035	1.5035	4	1.5035	1.5035	1.5035	NA	1.5035	1.5035	3	1.5035	1.5035	NA	1.5035	1.5035	1	NA	1.5035	1.5035	1.5035
662	70676	BARHAM	125396	2010	2525	3	3	16	W9A10YANA	3236	37	68	2	4	IRR	1.5801	g/100g	30/10/10 Hurricane	LAST	W9A10YANA_IRR	23.5	14	-2.429245283	-2.811320755	YANA	2	1.5801	NA	1.5801	1.5801	1.5801	4	1.5801	1.5801	1.5801	NA	1.5801	1.5801	4	1.5801	1.5801	1.5801	NA	1.5801	5	1.5801	1.5801	1.5801	1.5801
663	70677	EGA_STAMPEDE	122730	2010	1590	3	3	17	W9A10YANA	570	7	42	1	2	RFD	2.2446	g/100g	23/10/10 Lucerne	LAST	W9A10YANA_RFD	-2.5	-16	-2.429245283	-2.811320755	YANA	2	2.2446	NA	2.2446	2.2446	2.2446	1	NA	2.2446	2.2446	2.2446	2.2446	2.2446	2	2.2446	NA	2.2446	2.2446	2.2446	5	2.2446	2.2446	2.2446	2.2446
664	70678	MERINDA	122229	2010	1414	3	3	18	W9A10YANA	69	1	69	2	4	IRR	1.4977	g/100g	30/10/10 Lucerne	LAST	W9A10YANA_IRR	24.5	-22	-2.429245283	-2.811320755	YANA	3	1.4977	1.4977	NA	1.4977	1.4977	3	1.4977	1.4977	NA	1.4977	1.4977	1.4977	5	1.4977	1.4977	1.4977	1.4977	NA	5	1.4977	1.4977	1.4977	1.4977
665	70679	VW1193	119238	2010	371	3	3	19	W9A10COLE	1030	14	42	1	2	RFD	1.8121	g/100g	12/10/2010	LAST	W9A10COLE_RFD	3.5	-12.5	-2.429245283	-2.811320755	COLE	4	1.8121	1.8121	1.8121	NA	1.8121	1	NA	1.8121	1.8121	1.8121	1.8121	1.8121	3	1.8121	1.8121	NA	1.8121	1.8121	3	1.8121	1.8121	NA	1.8121
666	70680	VW2708	118756	2010	175	3	3	20	W9A10COLE	548	8	16	1	1	IRR	1.6341	g/100g	19/10/2010	LAST	W9A10COLE_IRR	-22.5	-18.5	-2.429245283	-2.811320755	COLE	3	1.6341	1.6341	NA	1.6341	1.6341	1	NA	1.6341	1.6341	1.6341	1.6341	1.6341	5	1.6341	1.6341	1.6341	1.6341	NA	4	1.6341	1.6341	1.6341	NA
667	70681	HRZ03_0005	121581	2010	1183	3	3	21	W9A10COLE	3373	45	29	2	4	IRR	2.1458	g/100g	27/10/10 Lucerne	LAST	W9A10COLE_IRR	-9.5	18.5	-2.429245283	-2.811320755	COLE	1	NA	2.1458	2.1458	2.1458	2.1458	4	2.1458	2.1458	2.1458	NA	2.1458	2.1458	5	2.1458	2.1458	2.1458	2.1458	NA	5	2.1458	2.1458	2.1458	2.1458
668	70682	VW3595	123705	2010	1940	3	3	22	W9A10YANA	1545	18	49	2	3	RFD	1.7043	g/100g	30/10/10 Lucerne	LAST	W9A10YANA_RFD	4.5	-5	-2.429245283	-2.811320755	YANA	3	1.7043	1.7043	NA	1.7043	1.7043	5	1.7043	1.7043	1.7043	1.7043	NA	1.7043	4	1.7043	1.7043	1.7043	NA	1.7043	2	1.7043	NA	1.7043	1.7043
669	70683	HRZ05_0145	122891	2010	1647	3	3	23	W9A10YANA	731	9	27	1	2	RFD	2.6446	g/100g	23/10/10 Hurricane	LAST	W9A10YANA_RFD	-17.5	-14	-2.429245283	-2.811320755	YANA	2	2.6446	NA	2.6446	2.6446	2.6446	2	2.6446	NA	2.6446	2.6446	2.6446	2.6446	1	NA	2.6446	2.6446	2.6446	2.6446	1	NA	2.6446	2.6446	2.6446
670	70684	HRZ06_0067	118787	2010	187	3	3	24	W9A10COLE	579	8	47	1	1	IRR	1.6214	g/100g	19/10/2010	LAST	W9A10COLE_IRR	8.5	-18.5	-2.429245283	-2.811320755	COLE	1	NA	1.6214	1.6214	1.6214	1.6214	3	1.6214	1.6214	NA	1.6214	1.6214	1.6214	1	NA	1.6214	1.6214	1.6214	1.6214	4	1.6214	1.6214	1.6214	NA
671	70685	VW0394	122834	2010	1624	3	3	25	W9A10YANA	674	8	58	2	3	RFD	1.7936	g/100g	30/10/10 Lucerne	LAST	W9A10YANA_RFD	13.5	-15	-2.429245283	-2.811320755	YANA	2	1.7936	NA	1.7936	1.7936	1.7936	1	NA	1.7936	1.7936	1.7936	1.7936	1.7936	5	1.7936	1.7936	1.7936	1.7936	NA	2	1.7936	NA	1.7936	1.7936
672	70686	ZEBU	122387	2010	1474	3	3	26	W9A10YANA	227	3	51	2	3	RFD	2.5919	g/100g	30/10/10 Lucerne	LAST	W9A10YANA_RFD	6.5	-20	-2.429245283	-2.811320755	YANA	3	2.5919	2.5919	NA	2.5919	2.5919	3	2.5919	2.5919	NA	2.5919	2.5919	2.5919	2	2.5919	NA	2.5919	2.5919	2.5919	4	2.5919	2.5919	2.5919	NA
673	70687	WW13735	121695	2010	1219	3	3	27	W9A10COLE	3487	46	67	2	4	IRR	2.2718	g/100g	27/10/10 Hurricane	LAST	W9A10COLE_IRR	28.5	19.5	-2.429245283	-2.811320755	COLE	1	NA	2.2718	2.2718	2.2718	2.2718	2	2.2718	NA	2.2718	2.2718	2.2718	2.2718	1	NA	2.2718	2.2718	2.2718	2.2718	5	2.2718	2.2718	2.2718	2.2718
674	70688	9329_13	122444	2010	1492	3	3	28	W9A10YANA	284	4	20	1	1	IRR	2.1201	g/100g	23/10/10 Lucerne	LAST	W9A10YANA_IRR	-24.5	-19	-2.429245283	-2.811320755	YANA	5	2.1201	2.1201	2.1201	2.1201	NA	1	NA	2.1201	2.1201	2.1201	2.1201	2.1201	2	2.1201	NA	2.1201	2.1201	2.1201	4	2.1201	2.1201	2.1201	NA
675	70689	HRZ05_0283	124314	2010	2154	3	3	29	W9A10YANA	2154	25	42	1	2	RFD	2.5246	g/100g	23/10/10 Hurricane	LAST	W9A10YANA_RFD	-2.5	2	-2.429245283	-2.811320755	YANA	4	2.5246	2.5246	2.5246	NA	2.5246	1	NA	2.5246	2.5246	2.5246	2.5246	2.5246	1	NA	2.5246	2.5246	2.5246	2.5246	4	2.5246	2.5246	2.5246	NA
676	70690	WW18784	119686	2010	526	3	3	30	W9A10COLE	1478	20	34	1	2	RFD	0.71554	g/100g	19/10/2010	LAST	W9A10COLE_RFD	-4.5	-6.5	-2.429245283	-2.811320755	COLE	2	0.71554	NA	0.71554	0.71554	0.71554	4	0.71554	0.71554	0.71554	NA	0.71554	0.71554	3	0.71554	0.71554	NA	0.71554	0.71554	1	NA	0.71554	0.71554	0.71554
677	70691	WW17950	124028	2010	2050	3	4	1	W9A10YANA	1868	22	20	1	1	IRR	2.1766	g/100g	23/10/10 Hurricane	LAST	W9A10YANA_IRR	-24.5	-1	-1.429245283	-2.811320755	YANA	1	NA	2.1766	2.1766	2.1766	2.1766	2	2.1766	NA	2.1766	2.1766	2.1766	2.1766	1	NA	2.1766	2.1766	2.1766	2.1766	3	2.1766	2.1766	NA	2.1766
678	70692	SERI_DWARF	125095	2010	2415	3	4	2	W9A10YANA	2935	34	31	1	2	RFD	3.2707	g/100g	23/10/10 Hurricane	LAST	W9A10YANA_RFD	-13.5	11	-1.429245283	-2.811320755	YANA	5	3.2707	3.2707	3.2707	3.2707	NA	3	3.2707	3.2707	NA	3.2707	3.2707	3.2707	4	3.2707	3.2707	3.2707	NA	3.2707	2	3.2707	NA	3.2707	3.2707
679	70693	WW19682	121675	2010	1211	3	4	3	W9A10COLE	3467	46	47	2	4	IRR	2.0507	g/100g	27/10/10 Hurricane	LAST	W9A10COLE_IRR	8.5	19.5	-1.429245283	-2.811320755	COLE	2	2.0507	NA	2.0507	2.0507	2.0507	2	2.0507	NA	2.0507	2.0507	2.0507	2.0507	4	2.0507	2.0507	2.0507	NA	2.0507	4	2.0507	2.0507	2.0507	NA
680	70694	SUN571B	122639	2010	1560	3	4	4	W9A10YANA	479	6	39	1	2	RFD	2.0832	g/100g	23/10/10 Hurricane	LAST	W9A10YANA_RFD	-5.5	-17	-1.429245283	-2.811320755	YANA	5	2.0832	2.0832	2.0832	2.0832	NA	3	2.0832	2.0832	NA	2.0832	2.0832	2.0832	5	2.0832	2.0832	2.0832	2.0832	NA	3	2.0832	2.0832	NA	2.0832
681	70695	VW0779	118363	2010	45	3	4	5	W9A10COLE	155	3	3	1	1	IRR	1.4347	g/100g	23/10/10 Lucerne	LAST	W9A10COLE_IRR	-35.5	-23.5	-1.429245283	-2.811320755	COLE	1	NA	1.4347	1.4347	1.4347	1.4347	5	1.4347	1.4347	1.4347	1.4347	NA	1.4347	3	1.4347	1.4347	NA	1.4347	1.4347	4	1.4347	1.4347	1.4347	NA
682	70696	VW0395	123927	2010	2015	3	4	6	W9A10YANA	1767	21	7	1	1	IRR	1.9668	g/100g	23/10/10 Lucerne	LAST	W9A10YANA_IRR	-37.5	-2	-1.429245283	-2.811320755	YANA	2	1.9668	NA	1.9668	1.9668	1.9668	4	1.9668	1.9668	1.9668	NA	1.9668	1.9668	4	1.9668	1.9668	1.9668	NA	1.9668	3	1.9668	1.9668	NA	1.9668
683	70697	RAC1502	122859	2010	1635	3	4	7	W9A10YANA	699	8	83	2	4	IRR	2.3051	g/100g	30/10/10 Hurricane	LAST	W9A10YANA_IRR	38.5	-15	-1.429245283	-2.811320755	YANA	2	2.3051	NA	2.3051	2.3051	2.3051	2	2.3051	NA	2.3051	2.3051	2.3051	2.3051	5	2.3051	2.3051	2.3051	2.3051	NA	4	2.3051	2.3051	2.3051	NA
684	70698	LPB04_2172	123159	2010	1748	3	4	8	W9A10YANA	999	12	31	1	2	RFD	3.0443	g/100g	23/10/10 Hurricane	LAST	W9A10YANA_RFD	-13.5	-11	-1.429245283	-2.811320755	YANA	1	NA	3.0443	3.0443	3.0443	3.0443	4	3.0443	3.0443	3.0443	NA	3.0443	3.0443	2	3.0443	NA	3.0443	3.0443	3.0443	1	NA	3.0443	3.0443	3.0443
685	70699	VW3707	123500	2010	1866	3	4	9	W9A10YANA	1340	16	20	1	1	IRR	2.2802	g/100g	23/10/10 Lucerne	LAST	W9A10YANA_IRR	-24.5	-7	-1.429245283	-2.811320755	YANA	3	2.2802	2.2802	NA	2.2802	2.2802	1	NA	2.2802	2.2802	2.2802	2.2802	2.2802	3	2.2802	2.2802	NA	2.2802	2.2802	5	2.2802	2.2802	2.2802	2.2802
686	70700	HRZ04_0421	122916	2010	1657	3	4	10	W9A10YANA	756	9	52	2	3	RFD	2.4	g/100g	30/10/10 Hurricane	LAST	W9A10YANA_RFD	7.5	-14	-1.429245283	-2.811320755	YANA	5	2.4	2.4	2.4	2.4	NA	1	NA	2.4	2.4	2.4	2.4	2.4	1	NA	2.4	2.4	2.4	2.4	1	NA	2.4	2.4	2.4
687	70701	WAGT025	124590	2010	2244	3	4	11	W9A10YANA	2430	28	54	2	3	RFD	2.0844	g/100g	30/10/10 Hurricane	LAST	W9A10YANA_RFD	9.5	5	-1.429245283	-2.811320755	YANA	4	2.0844	2.0844	2.0844	NA	2.0844	1	NA	2.0844	2.0844	2.0844	2.0844	2.0844	4	2.0844	2.0844	2.0844	NA	2.0844	3	2.0844	2.0844	NA	2.0844
688	70702	WW17062	120280	2010	722	3	4	12	W9A10COLE	2072	28	20	2	3	RFD	2.0001	g/100g	27/10/10 Lucerne	LAST	W9A10COLE_RFD	-18.5	1.5	-1.429245283	-2.811320755	COLE	1	NA	2.0001	2.0001	2.0001	2.0001	1	NA	2.0001	2.0001	2.0001	2.0001	2.0001	5	2.0001	2.0001	2.0001	2.0001	NA	3	2.0001	2.0001	NA	2.0001
689	70703	SUN570D	119333	2010	417	3	4	13	W9A10COLE	1125	15	61	1	2	RFD	1.3028	g/100g	19/10/2010	LAST	W9A10COLE_RFD	22.5	-11.5	-1.429245283	-2.811320755	COLE	1	NA	1.3028	1.3028	1.3028	1.3028	5	1.3028	1.3028	1.3028	1.3028	NA	1.3028	5	1.3028	1.3028	1.3028	1.3028	NA	4	1.3028	1.3028	1.3028	NA
690	70704	WW16612	121899	2010	1294	3	4	14	W9A10COLE	3691	49	43	2	4	IRR	2.0386	g/100g	27/10/10 Lucerne	LAST	W9A10COLE_IRR	4.5	22.5	-1.429245283	-2.811320755	COLE	2	2.0386	NA	2.0386	2.0386	2.0386	3	2.0386	2.0386	NA	2.0386	2.0386	2.0386	2	2.0386	NA	2.0386	2.0386	2.0386	3	2.0386	2.0386	NA	2.0386
691	70705	WW21843	122885	2010	1643	3	4	15	W9A10YANA	725	9	21	1	1	IRR	2.2141	g/100g	23/10/10 Lucerne	LAST	W9A10YANA_IRR	-23.5	-14	-1.429245283	-2.811320755	YANA	4	2.2141	2.2141	2.2141	NA	2.2141	4	2.2141	2.2141	2.2141	NA	2.2141	2.2141	3	2.2141	2.2141	NA	2.2141	2.2141	1	NA	2.2141	2.2141	2.2141
692	70706	SUPER_SERI_1	122925	2010	1661	3	4	16	W9A10YANA	765	9	61	2	3	RFD	2.8309	g/100g	NA	LAST	W9A10YANA_RFD	16.5	-14	-1.429245283	-2.811320755	YANA	1	NA	2.8309	2.8309	2.8309	2.8309	3	2.8309	2.8309	NA	2.8309	2.8309	2.8309	5	2.8309	2.8309	2.8309	2.8309	NA	1	NA	2.8309	2.8309	2.8309
693	70707	WW20672	121084	2010	1021	3	4	17	W9A10COLE	2876	38	64	2	3	RFD	2.1259	g/100g	27/10/10 Lucerne	LAST	W9A10COLE_RFD	25.5	11.5	-1.429245283	-2.811320755	COLE	4	2.1259	2.1259	2.1259	NA	2.1259	3	2.1259	2.1259	NA	2.1259	2.1259	2.1259	2	2.1259	NA	2.1259	2.1259	2.1259	2	2.1259	NA	2.1259	2.1259
694	70708	VW0779	123958	2010	2026	3	4	18	W9A10YANA	1798	21	38	1	2	RFD	2.8664	g/100g	23/10/10 Hurricane	LAST	W9A10YANA_RFD	-6.5	-2	-1.429245283	-2.811320755	YANA	1	NA	2.8664	2.8664	2.8664	2.8664	5	2.8664	2.8664	2.8664	2.8664	NA	2.8664	3	2.8664	2.8664	NA	2.8664	2.8664	4	2.8664	2.8664	2.8664	NA
695	70709	HRZ06_0321	121965	2010	1319	3	4	19	W9A10COLE	3757	50	33	2	4	IRR	1.9088	g/100g	27/10/10 Lucerne	LAST	W9A10COLE_IRR	-5.5	23.5	-1.429245283	-2.811320755	COLE	4	1.9088	1.9088	1.9088	NA	1.9088	2	1.9088	NA	1.9088	1.9088	1.9088	1.9088	2	1.9088	NA	1.9088	1.9088	1.9088	4	1.9088	1.9088	1.9088	NA
696	70710	VW4076	118749	2010	169	3	4	20	W9A10COLE	541	8	9	1	1	IRR	1.7846	g/100g	12/10/2010	LAST	W9A10COLE_IRR	-29.5	-18.5	-1.429245283	-2.811320755	COLE	2	1.7846	NA	1.7846	1.7846	1.7846	2	1.7846	NA	1.7846	1.7846	1.7846	1.7846	2	1.7846	NA	1.7846	1.7846	1.7846	5	1.7846	1.7846	1.7846	1.7846
697	70711	WW19127	124248	2010	2131	3	4	21	W9A10YANA	2088	24	64	2	3	RFD	1.9085	g/100g	30/10/10 Lucerne	LAST	W9A10YANA_RFD	19.5	1	-1.429245283	-2.811320755	YANA	1	NA	1.9085	1.9085	1.9085	1.9085	5	1.9085	1.9085	1.9085	1.9085	NA	1.9085	2	1.9085	NA	1.9085	1.9085	1.9085	3	1.9085	1.9085	NA	1.9085
698	70712	WAGT025	121236	2010	1056	3	4	22	W9A10COLE	3028	40	64	2	4	IRR	1.9703	g/100g	27/10/10 Lucerne	LAST	W9A10COLE_IRR	25.5	13.5	-1.429245283	-2.811320755	COLE	4	1.9703	1.9703	1.9703	NA	1.9703	1	NA	1.9703	1.9703	1.9703	1.9703	1.9703	4	1.9703	1.9703	1.9703	NA	1.9703	3	1.9703	1.9703	NA	1.9703
699	70713	SUNVALE	120872	2010	913	3	4	23	W9A10COLE	2664	36	4	2	3	RFD	0.97664	g/100g	27/10/10 Lucerne	LAST	W9A10COLE_RFD	-34.5	9.5	-1.429245283	-2.811320755	COLE	2	0.97664	NA	0.97664	0.97664	0.97664	1	NA	0.97664	0.97664	0.97664	0.97664	0.97664	5	0.97664	0.97664	0.97664	0.97664	NA	3	0.97664	0.97664	NA	0.97664
700	70714	HRZ06_0292	118599	2010	129	3	4	24	W9A10COLE	391	6	11	1	1	IRR	1.8345	g/100g	19/10/2010	LAST	W9A10COLE_IRR	-27.5	-20.5	-1.429245283	-2.811320755	COLE	4	1.8345	1.8345	1.8345	NA	1.8345	2	1.8345	NA	1.8345	1.8345	1.8345	1.8345	1	NA	1.8345	1.8345	1.8345	1.8345	4	1.8345	1.8345	1.8345	NA
701	70715	VW3398	118236	2010	10	3	4	25	W9A10COLE	28	1	28	1	1	IRR	1.2942	g/100g	23/10/10 Lucerne	LAST	W9A10COLE_IRR	-10.5	-25.5	-1.429245283	-2.811320755	COLE	2	1.2942	NA	1.2942	1.2942	1.2942	3	1.2942	1.2942	NA	1.2942	1.2942	1.2942	1	NA	1.2942	1.2942	1.2942	1.2942	3	1.2942	1.2942	NA	1.2942
702	70716	WW19561	120051	2010	653	3	4	26	W9A10COLE	1843	25	19	1	2	RFD	2.1007	g/100g	19/10/2010	LAST	W9A10COLE_RFD	-19.5	-1.5	-1.429245283	-2.811320755	COLE	5	2.1007	2.1007	2.1007	2.1007	NA	2	2.1007	NA	2.1007	2.1007	2.1007	2.1007	2	2.1007	NA	2.1007	2.1007	2.1007	4	2.1007	2.1007	2.1007	NA
703	70717	HRZ06_2070	120092	2010	670	3	4	27	W9A10COLE	1884	25	60	1	2	RFD	1.2427	g/100g	19/10/2010	LAST	W9A10COLE_RFD	21.5	-1.5	-1.429245283	-2.811320755	COLE	2	1.2427	NA	1.2427	1.2427	1.2427	4	1.2427	1.2427	1.2427	NA	1.2427	1.2427	4	1.2427	1.2427	1.2427	NA	1.2427	3	1.2427	1.2427	NA	1.2427
704	70718	LPB04_2351	121975	2010	1322	3	4	28	W9A10COLE	3767	50	43	2	4	IRR	1.8465	g/100g	27/10/10 Lucerne	LAST	W9A10COLE_IRR	4.5	23.5	-1.429245283	-2.811320755	COLE	4	1.8465	1.8465	1.8465	NA	1.8465	2	1.8465	NA	1.8465	1.8465	1.8465	1.8465	3	1.8465	1.8465	NA	1.8465	1.8465	4	1.8465	1.8465	1.8465	NA
705	70719	HRZ03_0062	119214	2010	353	3	4	29	W9A10COLE	1006	14	18	1	2	RFD	1.2154	g/100g	19/10/2010	LAST	W9A10COLE_RFD	-20.5	-12.5	-1.429245283	-2.811320755	COLE	3	1.2154	1.2154	NA	1.2154	1.2154	2	1.2154	NA	1.2154	1.2154	1.2154	1.2154	3	1.2154	1.2154	NA	1.2154	1.2154	3	1.2154	1.2154	NA	1.2154
706	70720	WW21873	125054	2010	2400	3	4	30	W9A10YANA	2894	33	78	2	4	IRR	1.9209	g/100g	30/10/10 Hurricane	LAST	W9A10YANA_IRR	33.5	10	-1.429245283	-2.811320755	YANA	3	1.9209	1.9209	NA	1.9209	1.9209	2	1.9209	NA	1.9209	1.9209	1.9209	1.9209	2	1.9209	NA	1.9209	1.9209	1.9209	3	1.9209	1.9209	NA	1.9209
707	70721	WAGT023	118220	2010	6	3	5	1	W9A10COLE	12	1	12	1	1	IRR	1.6678	g/100g	12/10/2010	LAST	W9A10COLE_IRR	-26.5	-25.5	-0.429245283	-2.811320755	COLE	5	1.6678	1.6678	1.6678	1.6678	NA	5	1.6678	1.6678	1.6678	1.6678	NA	1.6678	5	1.6678	1.6678	1.6678	1.6678	NA	3	1.6678	1.6678	NA	1.6678
708	70722	WW19754	120223	2010	706	3	5	2	W9A10COLE	2015	27	39	2	3	RFD	1.6889	g/100g	27/10/10 Lucerne	LAST	W9A10COLE_RFD	0.5	0.5	-0.429245283	-2.811320755	COLE	1	NA	1.6889	1.6889	1.6889	1.6889	5	1.6889	1.6889	1.6889	1.6889	NA	1.6889	2	1.6889	NA	1.6889	1.6889	1.6889	1	NA	1.6889	1.6889	1.6889
709	70723	GUARDIAN	119166	2010	335	3	5	3	W9A10COLE	958	13	46	1	1	IRR	2.075	g/100g	12/10/2010	LAST	W9A10COLE_IRR	7.5	-13.5	-0.429245283	-2.811320755	COLE	1	NA	2.075	2.075	2.075	2.075	4	2.075	2.075	2.075	NA	2.075	2.075	4	2.075	2.075	2.075	NA	2.075	1	NA	2.075	2.075	2.075
710	70724	HRZ05_0245	119888	2010	589	3	5	4	W9A10COLE	1680	23	8	1	2	RFD	2.1807	g/100g	19/10/2010	LAST	W9A10COLE_RFD	-30.5	-3.5	-0.429245283	-2.811320755	COLE	3	2.1807	2.1807	NA	2.1807	2.1807	3	2.1807	2.1807	NA	2.1807	2.1807	2.1807	3	2.1807	2.1807	NA	2.1807	2.1807	5	2.1807	2.1807	2.1807	2.1807
711	70725	GBA0608	119969	2010	626	3	5	5	W9A10COLE	1761	24	13	1	2	RFD	1.6159	g/100g	19/10/2010	LAST	W9A10COLE_RFD	-25.5	-2.5	-0.429245283	-2.811320755	COLE	1	NA	1.6159	1.6159	1.6159	1.6159	3	1.6159	1.6159	NA	1.6159	1.6159	1.6159	2	1.6159	NA	1.6159	1.6159	1.6159	3	1.6159	1.6159	NA	1.6159
712	70726	ROSELLA	119089	2010	298	3	5	6	W9A10COLE	881	12	45	1	1	IRR	0.1789	g/100g	12/10/2010	LAST	W9A10COLE_IRR	6.5	-14.5	-0.429245283	-2.811320755	COLE	4	0.1789	0.1789	0.1789	NA	0.1789	5	0.1789	0.1789	0.1789	0.1789	NA	0.1789	1	NA	0.1789	0.1789	0.1789	0.1789	3	0.1789	0.1789	NA	0.1789
713	70727	EGA_WEDGETAIL	123275	2010	1789	3	5	7	W9A10YANA	1115	13	59	2	3	RFD	1.4139	g/100g	30/10/10 Lucerne	LAST	W9A10YANA_RFD	14.5	-10	-0.429245283	-2.811320755	YANA	5	1.4139	1.4139	1.4139	1.4139	NA	3	1.4139	1.4139	NA	1.4139	1.4139	1.4139	5	1.4139	1.4139	1.4139	1.4139	NA	3	1.4139	1.4139	NA	1.4139
714	70728	QT13359	123951	2010	2023	3	5	8	W9A10YANA	1791	21	31	1	2	RFD	2.0981	g/100g	23/10/10 Hurricane	LAST	W9A10YANA_RFD	-13.5	-2	-0.429245283	-2.811320755	YANA	1	NA	2.0981	2.0981	2.0981	2.0981	3	2.0981	2.0981	NA	2.0981	2.0981	2.0981	5	2.0981	2.0981	2.0981	2.0981	NA	3	2.0981	2.0981	NA	2.0981
715	70729	WW19746	121159	2010	1037	3	5	9	W9A10COLE	2951	39	63	2	3	RFD	1.3872	g/100g	27/10/10 Lucerne	LAST	W9A10COLE_RFD	24.5	12.5	-0.429245283	-2.811320755	COLE	4	1.3872	1.3872	1.3872	NA	1.3872	4	1.3872	1.3872	1.3872	NA	1.3872	1.3872	4	1.3872	1.3872	1.3872	NA	1.3872	2	1.3872	NA	1.3872	1.3872
716	70730	WW18946	119452	2010	458	3	5	10	W9A10COLE	1244	17	28	1	2	RFD	1.4082	g/100g	12/10/2010	LAST	W9A10COLE_RFD	-10.5	-9.5	-0.429245283	-2.811320755	COLE	5	1.4082	1.4082	1.4082	1.4082	NA	3	1.4082	1.4082	NA	1.4082	1.4082	1.4082	5	1.4082	1.4082	1.4082	1.4082	NA	3	1.4082	1.4082	NA	1.4082
717	70731	VW4368	118904	2010	225	3	5	11	W9A10COLE	696	10	12	1	1	IRR	1.6019	g/100g	12/10/2010	LAST	W9A10COLE_IRR	-26.5	-16.5	-0.429245283	-2.811320755	COLE	4	1.6019	1.6019	1.6019	NA	1.6019	3	1.6019	1.6019	NA	1.6019	1.6019	1.6019	2	1.6019	NA	1.6019	1.6019	1.6019	1	NA	1.6019	1.6019	1.6019
718	70732	HRZ05_0245	120220	2010	705	3	5	12	W9A10COLE	2012	27	36	2	3	RFD	1.687	g/100g	27/10/10 Lucerne	LAST	W9A10COLE_RFD	-2.5	0.5	-0.429245283	-2.811320755	COLE	3	1.687	1.687	NA	1.687	1.687	3	1.687	1.687	NA	1.687	1.687	1.687	3	1.687	1.687	NA	1.687	1.687	5	1.687	1.687	1.687	1.687
719	70733	LANG	121440	2010	1132	3	5	13	W9A10COLE	3232	43	40	2	4	IRR	1.0907	g/100g	27/10/10 Lucerne	LAST	W9A10COLE_IRR	1.5	16.5	-0.429245283	-2.811320755	COLE	5	1.0907	1.0907	1.0907	1.0907	NA	5	1.0907	1.0907	1.0907	1.0907	NA	1.0907	2	1.0907	NA	1.0907	1.0907	1.0907	3	1.0907	1.0907	NA	1.0907
720	70734	VW2843	123120	2010	1733	3	5	14	W9A10YANA	960	11	80	2	4	IRR	1.9524	g/100g	30/10/10 Hurricane	LAST	W9A10YANA_IRR	35.5	-12	-0.429245283	-2.811320755	YANA	4	1.9524	1.9524	1.9524	NA	1.9524	5	1.9524	1.9524	1.9524	1.9524	NA	1.9524	4	1.9524	1.9524	1.9524	NA	1.9524	5	1.9524	1.9524	1.9524	1.9524
721	70735	VW0398	120211	2010	703	3	5	15	W9A10COLE	2003	27	27	2	3	RFD	1.7594	g/100g	27/10/10 Lucerne	LAST	W9A10COLE_RFD	-11.5	0.5	-0.429245283	-2.811320755	COLE	4	1.7594	1.7594	1.7594	NA	1.7594	4	1.7594	1.7594	1.7594	NA	1.7594	1.7594	1	NA	1.7594	1.7594	1.7594	1.7594	4	1.7594	1.7594	1.7594	NA
722	70736	VW3595	122057	2010	1350	3	5	16	W9A10COLE	3849	51	49	2	4	IRR	0.97903	g/100g	27/10/10 Lucerne	LAST	W9A10COLE_IRR	10.5	24.5	-0.429245283	-2.811320755	COLE	3	0.97903	0.97903	NA	0.97903	0.97903	5	0.97903	0.97903	0.97903	0.97903	NA	0.97903	4	0.97903	0.97903	0.97903	NA	0.97903	2	0.97903	NA	0.97903	0.97903
723	70737	LPB04_2351	122370	2010	1468	3	5	17	W9A10YANA	210	3	34	1	2	RFD	1.9705	g/100g	23/10/10 Hurricane	LAST	W9A10YANA_RFD	-10.5	-20	-0.429245283	-2.811320755	YANA	4	1.9705	1.9705	1.9705	NA	1.9705	2	1.9705	NA	1.9705	1.9705	1.9705	1.9705	3	1.9705	1.9705	NA	1.9705	1.9705	4	1.9705	1.9705	1.9705	NA
724	70738	LPB04_2172	124717	2010	2283	3	5	18	W9A10YANA	2557	30	5	1	1	IRR	2.7804	g/100g	23/10/10 Hurricane	LAST	W9A10YANA_IRR	-39.5	7	-0.429245283	-2.811320755	YANA	1	NA	2.7804	2.7804	2.7804	2.7804	4	2.7804	2.7804	2.7804	NA	2.7804	2.7804	2	2.7804	NA	2.7804	2.7804	2.7804	1	NA	2.7804	2.7804	2.7804
725	70739	VW1190	119328	2010	415	3	5	19	W9A10COLE	1120	15	56	1	2	RFD	2.787	g/100g	12/10/2010	LAST	W9A10COLE_RFD	17.5	-11.5	-0.429245283	-2.811320755	COLE	4	2.787	2.787	2.787	NA	2.787	5	2.787	2.787	2.787	2.787	NA	2.787	3	2.787	2.787	NA	2.787	2.787	4	2.787	2.787	2.787	NA
726	70740	VW2001	123092	2010	1721	3	5	20	W9A10YANA	932	11	52	2	3	RFD	2.3541	g/100g	30/10/10 Hurricane	LAST	W9A10YANA_RFD	7.5	-12	-0.429245283	-2.811320755	YANA	2	2.3541	NA	2.3541	2.3541	2.3541	5	2.3541	2.3541	2.3541	2.3541	NA	2.3541	4	2.3541	2.3541	2.3541	NA	2.3541	3	2.3541	2.3541	NA	2.3541
727	70741	ZEBU	124972	2010	2372	3	5	21	W9A10YANA	2812	32	84	2	4	IRR	2.4326	g/100g	30/10/10 Hurricane	LAST	W9A10YANA_IRR	39.5	9	-0.429245283	-2.811320755	YANA	3	2.4326	2.4326	NA	2.4326	2.4326	3	2.4326	2.4326	NA	2.4326	2.4326	2.4326	2	2.4326	NA	2.4326	2.4326	2.4326	4	2.4326	2.4326	2.4326	NA
728	70742	WW19682	118962	2010	247	3	5	22	W9A10COLE	754	10	70	1	1	IRR	1.3561	g/100g	19/10/2010	LAST	W9A10COLE_IRR	31.5	-16.5	-0.429245283	-2.811320755	COLE	2	1.3561	NA	1.3561	1.3561	1.3561	2	1.3561	NA	1.3561	1.3561	1.3561	1.3561	4	1.3561	1.3561	1.3561	NA	1.3561	4	1.3561	1.3561	1.3561	NA
729	70743	VW3170	120207	2010	701	3	5	23	W9A10COLE	1999	27	23	2	3	RFD	2.1968	g/100g	27/10/10 Lucerne	LAST	W9A10COLE_RFD	-15.5	0.5	-0.429245283	-2.811320755	COLE	5	2.1968	2.1968	2.1968	2.1968	NA	1	NA	2.1968	2.1968	2.1968	2.1968	2.1968	3	2.1968	2.1968	NA	2.1968	2.1968	2	2.1968	NA	2.1968	2.1968
730	70744	WW19492	119812	2010	573	3	5	24	W9A10COLE	1604	22	8	1	2	RFD	1.3334	g/100g	12/10/2010	LAST	W9A10COLE_RFD	-30.5	-4.5	-0.429245283	-2.811320755	COLE	2	1.3334	NA	1.3334	1.3334	1.3334	1	NA	1.3334	1.3334	1.3334	1.3334	1.3334	5	1.3334	1.3334	1.3334	1.3334	NA	3	1.3334	1.3334	NA	1.3334
731	70745	ATTILA	120347	2010	743	3	5	25	W9A10COLE	2139	29	11	2	3	RFD	2.7809	g/100g	27/10/10 Lucerne	LAST	W9A10COLE_RFD	-27.5	2.5	-0.429245283	-2.811320755	COLE	1	NA	2.7809	2.7809	2.7809	2.7809	5	2.7809	2.7809	2.7809	2.7809	NA	2.7809	3	2.7809	2.7809	NA	2.7809	2.7809	1	NA	2.7809	2.7809	2.7809
732	70746	VW0779	125524	2010	2569	3	5	26	W9A10YANA	3364	39	20	1	1	IRR	2.5728	g/100g	23/10/10 Lucerne	LAST	W9A10YANA_IRR	-24.5	16	-0.429245283	-2.811320755	YANA	1	NA	2.5728	2.5728	2.5728	2.5728	5	2.5728	2.5728	2.5728	2.5728	NA	2.5728	3	2.5728	2.5728	NA	2.5728	2.5728	4	2.5728	2.5728	2.5728	NA
733	70747	CRUSADER	121457	2010	1141	3	5	27	W9A10COLE	3249	43	57	2	4	IRR	1.7134	g/100g	27/10/10 Lucerne	LAST	W9A10COLE_IRR	18.5	16.5	-0.429245283	-2.811320755	COLE	2	1.7134	NA	1.7134	1.7134	1.7134	1	NA	1.7134	1.7134	1.7134	1.7134	1.7134	4	1.7134	1.7134	1.7134	NA	1.7134	2	1.7134	NA	1.7134	1.7134
734	70748	VW1194	120919	2010	938	3	5	28	W9A10COLE	2711	36	51	2	3	RFD	2.426	g/100g	27/10/10 Lucerne	LAST	W9A10COLE_RFD	12.5	9.5	-0.429245283	-2.811320755	COLE	4	2.426	2.426	2.426	NA	2.426	1	NA	2.426	2.426	2.426	2.426	2.426	3	2.426	2.426	NA	2.426	2.426	2	2.426	NA	2.426	2.426
735	70749	WW19492	121116	2010	1027	3	5	29	W9A10COLE	2908	39	20	2	3	RFD	2.5518	g/100g	27/10/10 Lucerne	LAST	W9A10COLE_RFD	-18.5	12.5	-0.429245283	-2.811320755	COLE	2	2.5518	NA	2.5518	2.5518	2.5518	1	NA	2.5518	2.5518	2.5518	2.5518	2.5518	5	2.5518	2.5518	2.5518	2.5518	NA	3	2.5518	2.5518	NA	2.5518
736	70750	WAGT033	125707	2010	2633	3	5	30	W9A10YANA	3547	41	27	1	2	RFD	2.6427	g/100g	23/10/10 Hurricane	LAST	W9A10YANA_RFD	-17.5	18	-0.429245283	-2.811320755	YANA	2	2.6427	NA	2.6427	2.6427	2.6427	2	2.6427	NA	2.6427	2.6427	2.6427	2.6427	4	2.6427	2.6427	2.6427	NA	2.6427	2	2.6427	NA	2.6427	2.6427
737	70751	HRZ06_0321	123936	2010	2017	3	6	1	W9A10YANA	1776	21	16	1	1	IRR	2.2246	g/100g	23/10/10 Hurricane	LAST	W9A10YANA_IRR	-28.5	-2	0.570754717	-2.811320755	YANA	4	2.2246	2.2246	2.2246	NA	2.2246	2	2.2246	NA	2.2246	2.2246	2.2246	2.2246	2	2.2246	NA	2.2246	2.2246	2.2246	4	2.2246	2.2246	2.2246	NA
738	70752	WW19548	125415	2010	2531	3	6	2	W9A10YANA	3255	37	87	2	4	IRR	1.566	g/100g	30/10/10 Hurricane	LAST	W9A10YANA_IRR	42.5	14	0.570754717	-2.811320755	YANA	3	1.566	1.566	NA	1.566	1.566	2	1.566	NA	1.566	1.566	1.566	1.566	3	1.566	1.566	NA	1.566	1.566	4	1.566	1.566	1.566	NA
739	70753	WW19954	121298	2010	1077	3	6	3	W9A10COLE	3090	41	50	2	4	IRR	2.277	g/100g	27/10/10 Hurricane	LAST	W9A10COLE_IRR	11.5	14.5	0.570754717	-2.811320755	COLE	2	2.277	NA	2.277	2.277	2.277	5	2.277	2.277	2.277	2.277	NA	2.277	4	2.277	2.277	2.277	NA	2.277	3	2.277	2.277	NA	2.277
740	70754	VW1864	123418	2010	1842	3	6	4	W9A10YANA	1258	15	26	1	2	RFD	2.5722	g/100g	23/10/10 Lucerne	LAST	W9A10YANA_RFD	-18.5	-8	0.570754717	-2.811320755	YANA	5	2.5722	2.5722	2.5722	2.5722	NA	1	NA	2.5722	2.5722	2.5722	2.5722	2.5722	4	2.5722	2.5722	2.5722	NA	2.5722	4	2.5722	2.5722	2.5722	NA
741	70755	IRENA/BABAX//PASTOR	121072	2010	1016	3	6	5	W9A10COLE	2864	38	52	2	3	RFD	1.8412	g/100g	27/10/10 Lucerne	LAST	W9A10COLE_RFD	13.5	11.5	0.570754717	-2.811320755	COLE	5	1.8412	1.8412	1.8412	1.8412	NA	1	NA	1.8412	1.8412	1.8412	1.8412	1.8412	2	1.8412	NA	1.8412	1.8412	1.8412	2	1.8412	NA	1.8412	1.8412
742	70756	WW20256	118981	2010	253	3	6	6	W9A10COLE	773	11	13	1	1	IRR	1.254	g/100g	19/10/2010	LAST	W9A10COLE_IRR	-25.5	-15.5	0.570754717	-2.811320755	COLE	2	1.254	NA	1.254	1.254	1.254	5	1.254	1.254	1.254	1.254	NA	1.254	2	1.254	NA	1.254	1.254	1.254	1	NA	1.254	1.254	1.254
743	70757	WW13602	119109	2010	309	3	6	7	W9A10COLE	901	12	65	1	1	IRR	1.7091	g/100g	19/10/2010	LAST	W9A10COLE_IRR	26.5	-14.5	0.570754717	-2.811320755	COLE	4	1.7091	1.7091	1.7091	NA	1.7091	2	1.7091	NA	1.7091	1.7091	1.7091	1.7091	1	NA	1.7091	1.7091	1.7091	1.7091	1	NA	1.7091	1.7091	1.7091
744	70758	WW19864	125407	2010	2528	3	6	8	W9A10YANA	3247	37	79	2	4	IRR	1.9961	g/100g	30/10/10 Hurricane	LAST	W9A10YANA_IRR	34.5	14	0.570754717	-2.811320755	YANA	2	1.9961	NA	1.9961	1.9961	1.9961	2	1.9961	NA	1.9961	1.9961	1.9961	1.9961	1	NA	1.9961	1.9961	1.9961	1.9961	5	1.9961	1.9961	1.9961	1.9961
745	70759	HRZ06_0143	122983	2010	1685	3	6	9	W9A10YANA	823	10	31	1	2	RFD	2.2063	g/100g	23/10/10 Hurricane	LAST	W9A10YANA_RFD	-13.5	-13	0.570754717	-2.811320755	YANA	2	2.2063	NA	2.2063	2.2063	2.2063	5	2.2063	2.2063	2.2063	2.2063	NA	2.2063	3	2.2063	2.2063	NA	2.2063	2.2063	2	2.2063	NA	2.2063	2.2063
746	70760	WW20527	123624	2010	1910	3	6	10	W9A10YANA	1464	17	56	2	3	RFD	1.8802	g/100g	30/10/10 Lucerne	LAST	W9A10YANA_RFD	11.5	-6	0.570754717	-2.811320755	YANA	5	1.8802	1.8802	1.8802	1.8802	NA	4	1.8802	1.8802	1.8802	NA	1.8802	1.8802	5	1.8802	1.8802	1.8802	1.8802	NA	1	NA	1.8802	1.8802	1.8802
747	70761	HRZ05_0245	121608	2010	1194	3	6	11	W9A10COLE	3400	45	56	2	4	IRR	1.3942	g/100g	27/10/10 Hurricane	LAST	W9A10COLE_IRR	17.5	18.5	0.570754717	-2.811320755	COLE	3	1.3942	1.3942	NA	1.3942	1.3942	3	1.3942	1.3942	NA	1.3942	1.3942	1.3942	3	1.3942	1.3942	NA	1.3942	1.3942	5	1.3942	1.3942	1.3942	1.3942
748	70762	WW20664	120864	2010	910	3	6	12	W9A10COLE	2656	35	72	2	3	RFD	1.9946	g/100g	27/10/10 Lucerne	LAST	W9A10COLE_RFD	33.5	8.5	0.570754717	-2.811320755	COLE	3	1.9946	1.9946	NA	1.9946	1.9946	3	1.9946	1.9946	NA	1.9946	1.9946	1.9946	2	1.9946	NA	1.9946	1.9946	1.9946	4	1.9946	1.9946	1.9946	NA
749	70763	WW16452	125844	2010	2678	3	6	13	W9A10YANA	3684	42	76	2	4	IRR	1.5203	g/100g	30/10/10 Lucerne	LAST	W9A10YANA_IRR	31.5	19	0.570754717	-2.811320755	YANA	2	1.5203	NA	1.5203	1.5203	1.5203	1	NA	1.5203	1.5203	1.5203	1.5203	1.5203	4	1.5203	1.5203	1.5203	NA	1.5203	4	1.5203	1.5203	1.5203	NA
750	70764	VW3404	120506	2010	786	3	6	14	W9A10COLE	2298	31	18	2	3	RFD	1.9777	g/100g	27/10/10 Lucerne	LAST	W9A10COLE_RFD	-20.5	4.5	0.570754717	-2.811320755	COLE	5	1.9777	1.9777	1.9777	1.9777	NA	5	1.9777	1.9777	1.9777	1.9777	NA	1.9777	2	1.9777	NA	1.9777	1.9777	1.9777	4	1.9777	1.9777	1.9777	NA
751	70765	WW19716	121216	2010	1051	3	6	15	W9A10COLE	3008	40	44	2	4	IRR	2.7028	g/100g	27/10/10 Hurricane	LAST	W9A10COLE_IRR	5.5	13.5	0.570754717	-2.811320755	COLE	5	2.7028	2.7028	2.7028	2.7028	NA	5	2.7028	2.7028	2.7028	2.7028	NA	2.7028	4	2.7028	2.7028	2.7028	NA	2.7028	2	2.7028	NA	2.7028	2.7028
752	70766	WW20577	125394	2010	2524	3	6	16	W9A10YANA	3234	37	66	2	3	RFD	1.9183	g/100g	30/10/10 Hurricane	LAST	W9A10YANA_RFD	21.5	14	0.570754717	-2.811320755	YANA	5	1.9183	1.9183	1.9183	1.9183	NA	2	1.9183	NA	1.9183	1.9183	1.9183	1.9183	1	NA	1.9183	1.9183	1.9183	1.9183	1	NA	1.9183	1.9183	1.9183
753	70767	VW2426	118294	2010	25	3	6	17	W9A10COLE	86	2	10	1	1	IRR	1.3718	g/100g	19/10/2010	LAST	W9A10COLE_IRR	-28.5	-24.5	0.570754717	-2.811320755	COLE	4	1.3718	1.3718	1.3718	NA	1.3718	2	1.3718	NA	1.3718	1.3718	1.3718	1.3718	2	1.3718	NA	1.3718	1.3718	1.3718	2	1.3718	NA	1.3718	1.3718
754	70768	VW0644	120173	2010	691	3	6	18	W9A10COLE	1965	26	65	1	2	RFD	1.7943	g/100g	23/10/10 Lucerne	LAST	W9A10COLE_RFD	26.5	-0.5	0.570754717	-2.811320755	COLE	5	1.7943	1.7943	1.7943	1.7943	NA	1	NA	1.7943	1.7943	1.7943	1.7943	1.7943	3	1.7943	1.7943	NA	1.7943	1.7943	4	1.7943	1.7943	1.7943	NA
755	70769	HRZ06_2070	120357	2010	745	3	6	19	W9A10COLE	2149	29	21	2	3	RFD	2.5236	g/100g	27/10/10 Lucerne	LAST	W9A10COLE_RFD	-17.5	2.5	0.570754717	-2.811320755	COLE	2	2.5236	NA	2.5236	2.5236	2.5236	4	2.5236	2.5236	2.5236	NA	2.5236	2.5236	4	2.5236	2.5236	2.5236	NA	2.5236	3	2.5236	2.5236	NA	2.5236
756	70770	YENDA	124601	2010	2250	3	6	20	W9A10YANA	2441	28	65	2	3	RFD	1.8951	g/100g	30/10/10 Lucerne	LAST	W9A10YANA_RFD	20.5	5	0.570754717	-2.811320755	YANA	5	1.8951	1.8951	1.8951	1.8951	NA	4	1.8951	1.8951	1.8951	NA	1.8951	1.8951	2	1.8951	NA	1.8951	1.8951	1.8951	1	NA	1.8951	1.8951	1.8951
757	70771	ELLISON	123448	2010	1849	3	6	21	W9A10YANA	1288	15	56	2	3	RFD	2.4777	g/100g	30/10/10 Hurricane	LAST	W9A10YANA_RFD	11.5	-8	0.570754717	-2.811320755	YANA	3	2.4777	2.4777	NA	2.4777	2.4777	4	2.4777	2.4777	2.4777	NA	2.4777	2.4777	5	2.4777	2.4777	2.4777	2.4777	NA	5	2.4777	2.4777	2.4777	2.4777
758	70772	GLADIUS	121375	2010	1101	3	6	22	W9A10COLE	3167	42	51	2	4	IRR	1.6971	g/100g	27/10/10 Lucerne	LAST	W9A10COLE_IRR	12.5	15.5	0.570754717	-2.811320755	COLE	4	1.6971	1.6971	1.6971	NA	1.6971	5	1.6971	1.6971	1.6971	1.6971	NA	1.6971	4	1.6971	1.6971	1.6971	NA	1.6971	5	1.6971	1.6971	1.6971	1.6971
759	70773	WW19684	120433	2010	768	3	6	23	W9A10COLE	2225	30	21	2	3	RFD	2.6538	g/100g	27/10/10 Lucerne	LAST	W9A10COLE_RFD	-17.5	3.5	0.570754717	-2.811320755	COLE	5	2.6538	2.6538	2.6538	2.6538	NA	2	2.6538	NA	2.6538	2.6538	2.6538	2.6538	5	2.6538	2.6538	2.6538	2.6538	NA	2	2.6538	NA	2.6538	2.6538
760	70774	R901D	122247	2010	1421	3	6	24	W9A10YANA	87	1	87	2	4	IRR	2.2081	g/100g	30/10/10 Hurricane	LAST	W9A10YANA_IRR	42.5	-22	0.570754717	-2.811320755	YANA	1	NA	2.2081	2.2081	2.2081	2.2081	1	NA	2.2081	2.2081	2.2081	2.2081	2.2081	1	NA	2.2081	2.2081	2.2081	2.2081	3	2.2081	2.2081	NA	2.2081
761	70775	WW16259	119412	2010	443	3	6	25	W9A10COLE	1204	16	64	1	2	RFD	2.4036	g/100g	12/10/2010	LAST	W9A10COLE_RFD	25.5	-10.5	0.570754717	-2.811320755	COLE	2	2.4036	NA	2.4036	2.4036	2.4036	5	2.4036	2.4036	2.4036	2.4036	NA	2.4036	5	2.4036	2.4036	2.4036	2.4036	NA	4	2.4036	2.4036	2.4036	NA
762	70776	HRZ04_0191	125091	2010	2413	3	6	26	W9A10YANA	2931	34	27	1	2	RFD	2.4677	g/100g	23/10/10 Hurricane	LAST	W9A10YANA_RFD	-17.5	11	0.570754717	-2.811320755	YANA	5	2.4677	2.4677	2.4677	2.4677	NA	4	2.4677	2.4677	2.4677	NA	2.4677	2.4677	1	NA	2.4677	2.4677	2.4677	2.4677	3	2.4677	2.4677	NA	2.4677
763	70777	WW20577	122770	2010	1602	3	6	27	W9A10YANA	610	7	82	2	4	IRR	1.6663	g/100g	30/10/10 Hurricane	LAST	W9A10YANA_IRR	37.5	-16	0.570754717	-2.811320755	YANA	5	1.6663	1.6663	1.6663	1.6663	NA	2	1.6663	NA	1.6663	1.6663	1.6663	1.6663	1	NA	1.6663	1.6663	1.6663	1.6663	1	NA	1.6663	1.6663	1.6663
764	70778	WW20214	122572	2010	1532	3	6	28	W9A10YANA	412	5	60	2	3	RFD	1.8704	g/100g	30/10/10 Lucerne	LAST	W9A10YANA_RFD	15.5	-18	0.570754717	-2.811320755	YANA	2	1.8704	NA	1.8704	1.8704	1.8704	2	1.8704	NA	1.8704	1.8704	1.8704	1.8704	3	1.8704	1.8704	NA	1.8704	1.8704	4	1.8704	1.8704	1.8704	NA
765	70779	SUPER_SERI_1	120992	2010	978	3	6	29	W9A10COLE	2784	37	48	2	3	RFD	2.518	g/100g	27/10/10 Lucerne	LAST	W9A10COLE_RFD	9.5	10.5	0.570754717	-2.811320755	COLE	1	NA	2.518	2.518	2.518	2.518	3	2.518	2.518	NA	2.518	2.518	2.518	5	2.518	2.518	2.518	2.518	NA	1	NA	2.518	2.518	2.518
766	70780	CURRAWONG	123191	2010	1761	3	6	30	W9A10YANA	1031	12	63	2	3	RFD	1.5263	g/100g	30/10/10 Hurricane	LAST	W9A10YANA_RFD	18.5	-11	0.570754717	-2.811320755	YANA	5	1.5263	1.5263	1.5263	1.5263	NA	4	1.5263	1.5263	1.5263	NA	1.5263	1.5263	3	1.5263	1.5263	NA	1.5263	1.5263	3	1.5263	1.5263	NA	1.5263
767	70781	VT1022	118422	2010	67	3	7	1	W9A10COLE	214	3	62	1	1	IRR	1.1246	g/100g	19/10/2010	LAST	W9A10COLE_IRR	23.5	-23.5	1.570754717	-2.811320755	COLE	5	1.1246	1.1246	1.1246	1.1246	NA	5	1.1246	1.1246	1.1246	1.1246	NA	1.1246	3	1.1246	1.1246	NA	1.1246	1.1246	3	1.1246	1.1246	NA	1.1246
768	70782	VW3466	125326	2010	2501	3	7	2	W9A10YANA	3166	36	86	2	4	IRR	1.7371	g/100g	30/10/10 Hurricane	LAST	W9A10YANA_IRR	41.5	13	1.570754717	-2.811320755	YANA	1	NA	1.7371	1.7371	1.7371	1.7371	3	1.7371	1.7371	NA	1.7371	1.7371	1.7371	4	1.7371	1.7371	1.7371	NA	1.7371	3	1.7371	1.7371	NA	1.7371
769	70783	VV2856	122857	2010	1634	3	7	3	W9A10YANA	697	8	81	2	4	IRR	2.0704	g/100g	30/10/10 Hurricane	LAST	W9A10YANA_IRR	36.5	-15	1.570754717	-2.811320755	YANA	3	2.0704	2.0704	NA	2.0704	2.0704	5	2.0704	2.0704	2.0704	2.0704	NA	2.0704	1	NA	2.0704	2.0704	2.0704	2.0704	2	2.0704	NA	2.0704	2.0704
770	70784	WW14311	123906	2010	2009	3	7	4	W9A10YANA	1746	20	74	2	4	IRR	1.7104	g/100g	30/10/10 Hurricane	LAST	W9A10YANA_IRR	29.5	-3	1.570754717	-2.811320755	YANA	3	1.7104	1.7104	NA	1.7104	1.7104	3	1.7104	1.7104	NA	1.7104	1.7104	1.7104	4	1.7104	1.7104	1.7104	NA	1.7104	3	1.7104	1.7104	NA	1.7104
771	70785	WW20406	119941	2010	616	3	7	5	W9A10COLE	1733	23	61	1	2	RFD	0.86919	g/100g	12/10/2010	LAST	W9A10COLE_RFD	22.5	-3.5	1.570754717	-2.811320755	COLE	3	0.86919	0.86919	NA	0.86919	0.86919	2	0.86919	NA	0.86919	0.86919	0.86919	0.86919	5	0.86919	0.86919	0.86919	0.86919	NA	5	0.86919	0.86919	0.86919	0.86919
772	70786	SUN562A	118333	2010	33	3	7	6	W9A10COLE	125	2	49	1	1	IRR	1.5809	g/100g	12/10/2010	LAST	W9A10COLE_IRR	10.5	-24.5	1.570754717	-2.811320755	COLE	4	1.5809	1.5809	1.5809	NA	1.5809	3	1.5809	1.5809	NA	1.5809	1.5809	1.5809	1	NA	1.5809	1.5809	1.5809	1.5809	2	1.5809	NA	1.5809	1.5809
773	70787	VW1929	122124	2010	1374	3	7	7	W9A10COLE	3916	52	40	2	4	IRR	1.6307	g/100g	27/10/10 Lucerne	LAST	W9A10COLE_IRR	1.5	25.5	1.570754717	-2.811320755	COLE	5	1.6307	1.6307	1.6307	1.6307	NA	3	1.6307	1.6307	NA	1.6307	1.6307	1.6307	2	1.6307	NA	1.6307	1.6307	1.6307	2	1.6307	NA	1.6307	1.6307
774	70788	VS2177	122066	2010	1354	3	7	8	W9A10COLE	3858	51	58	2	4	IRR	2.3807	g/100g	27/10/10 Lucerne	LAST	W9A10COLE_IRR	19.5	24.5	1.570754717	-2.811320755	COLE	2	2.3807	NA	2.3807	2.3807	2.3807	5	2.3807	2.3807	2.3807	2.3807	NA	2.3807	2	2.3807	NA	2.3807	2.3807	2.3807	2	2.3807	NA	2.3807	2.3807
775	70789	VW3404	119909	2010	601	3	7	9	W9A10COLE	1701	23	29	1	2	RFD	1.7422	g/100g	19/10/2010	LAST	W9A10COLE_RFD	-9.5	-3.5	1.570754717	-2.811320755	COLE	5	1.7422	1.7422	1.7422	1.7422	NA	5	1.7422	1.7422	1.7422	1.7422	NA	1.7422	2	1.7422	NA	1.7422	1.7422	1.7422	4	1.7422	1.7422	1.7422	NA
776	70790	WW19490	124729	2010	2288	3	7	10	W9A10YANA	2569	30	17	1	1	IRR	1.9985	g/100g	23/10/10 Lucerne	LAST	W9A10YANA_IRR	-27.5	7	1.570754717	-2.811320755	YANA	3	1.9985	1.9985	NA	1.9985	1.9985	5	1.9985	1.9985	1.9985	1.9985	NA	1.9985	5	1.9985	1.9985	1.9985	1.9985	NA	4	1.9985	1.9985	1.9985	NA
777	70791	WW19662	122360	2010	1465	3	7	11	W9A10YANA	200	3	24	1	2	RFD	2.3941	g/100g	23/10/10 Lucerne	LAST	W9A10YANA_RFD	-20.5	-20	1.570754717	-2.811320755	YANA	4	2.3941	2.3941	2.3941	NA	2.3941	5	2.3941	2.3941	2.3941	2.3941	NA	2.3941	5	2.3941	2.3941	2.3941	2.3941	NA	1	NA	2.3941	2.3941	2.3941
778	70792	WAGT025	122516	2010	1515	3	7	12	W9A10YANA	356	5	4	1	1	IRR	1.8735	g/100g	23/10/10 Hurricane	LAST	W9A10YANA_IRR	-40.5	-18	1.570754717	-2.811320755	YANA	4	1.8735	1.8735	1.8735	NA	1.8735	1	NA	1.8735	1.8735	1.8735	1.8735	1.8735	4	1.8735	1.8735	1.8735	NA	1.8735	3	1.8735	1.8735	NA	1.8735
779	70793	VW4192	123282	2010	1791	3	7	13	W9A10YANA	1122	13	66	2	3	RFD	1.9633	g/100g	30/10/10 Lucerne	LAST	W9A10YANA_RFD	21.5	-10	1.570754717	-2.811320755	YANA	2	1.9633	NA	1.9633	1.9633	1.9633	1	NA	1.9633	1.9633	1.9633	1.9633	1.9633	2	1.9633	NA	1.9633	1.9633	1.9633	2	1.9633	NA	1.9633	1.9633
780	70794	HRZ04_0154	125753	2010	2644	3	7	14	W9A10YANA	3593	41	73	2	4	IRR	2.1582	g/100g	30/10/10 Hurricane	LAST	W9A10YANA_IRR	28.5	18	1.570754717	-2.811320755	YANA	3	2.1582	2.1582	NA	2.1582	2.1582	3	2.1582	2.1582	NA	2.1582	2.1582	2.1582	4	2.1582	2.1582	2.1582	NA	2.1582	3	2.1582	2.1582	NA	2.1582
781	70795	HRZ04_0513	125463	2010	2553	3	7	15	W9A10YANA	3303	38	47	2	3	RFD	2.1058	g/100g	30/10/10 Lucerne	LAST	W9A10YANA_RFD	2.5	15	1.570754717	-2.811320755	YANA	2	2.1058	NA	2.1058	2.1058	2.1058	1	NA	2.1058	2.1058	2.1058	2.1058	2.1058	2	2.1058	NA	2.1058	2.1058	2.1058	3	2.1058	2.1058	NA	2.1058
782	70796	HRZ06_0053	122190	2010	1399	3	7	16	W9A10YANA	30	1	30	1	2	RFD	2.2421	g/100g	23/10/10 Hurricane	LAST	W9A10YANA_RFD	-14.5	-22	1.570754717	-2.811320755	YANA	4	2.2421	2.2421	2.2421	NA	2.2421	3	2.2421	2.2421	NA	2.2421	2.2421	2.2421	4	2.2421	2.2421	2.2421	NA	2.2421	4	2.2421	2.2421	2.2421	NA
783	70797	WW19826	125983	2010	2730	3	7	17	W9A10YANA	3823	44	39	1	2	RFD	2.1367	g/100g	23/10/10 Hurricane	LAST	W9A10YANA_RFD	-5.5	21	1.570754717	-2.811320755	YANA	1	NA	2.1367	2.1367	2.1367	2.1367	5	2.1367	2.1367	2.1367	2.1367	NA	2.1367	4	2.1367	2.1367	2.1367	NA	2.1367	5	2.1367	2.1367	2.1367	2.1367
784	70798	VW4056	123732	2010	1950	3	7	18	W9A10YANA	1572	18	76	2	4	IRR	1.4338	g/100g	30/10/10 Lucerne	LAST	W9A10YANA_IRR	31.5	-5	1.570754717	-2.811320755	YANA	2	1.4338	NA	1.4338	1.4338	1.4338	3	1.4338	1.4338	NA	1.4338	1.4338	1.4338	4	1.4338	1.4338	1.4338	NA	1.4338	1	NA	1.4338	1.4338	1.4338
785	70799	VT1020	124774	2010	2298	3	7	19	W9A10YANA	2614	30	62	2	3	RFD	1.8067	g/100g	30/10/10 Lucerne	LAST	W9A10YANA_RFD	17.5	7	1.570754717	-2.811320755	YANA	4	1.8067	1.8067	1.8067	NA	1.8067	3	1.8067	1.8067	NA	1.8067	1.8067	1.8067	2	1.8067	NA	1.8067	1.8067	1.8067	5	1.8067	1.8067	1.8067	1.8067
786	70800	HRZ06_0488	120822	2010	899	3	7	20	W9A10COLE	2614	35	30	2	3	RFD	2.2794	g/100g	27/10/10 Lucerne	LAST	W9A10COLE_RFD	-8.5	8.5	1.570754717	-2.811320755	COLE	3	2.2794	2.2794	NA	2.2794	2.2794	2	2.2794	NA	2.2794	2.2794	2.2794	2.2794	2	2.2794	NA	2.2794	2.2794	2.2794	4	2.2794	2.2794	2.2794	NA
787	70801	WW20667	123413	2010	1839	3	7	21	W9A10YANA	1253	15	21	1	1	IRR	1.9828	g/100g	23/10/10 Lucerne	LAST	W9A10YANA_IRR	-23.5	-8	1.570754717	-2.811320755	YANA	2	1.9828	NA	1.9828	1.9828	1.9828	2	1.9828	NA	1.9828	1.9828	1.9828	1.9828	4	1.9828	1.9828	1.9828	NA	1.9828	5	1.9828	1.9828	1.9828	1.9828
788	70802	VW3595	125865	2010	2685	3	7	22	W9A10YANA	3705	43	9	1	1	IRR	0.94423	g/100g	23/10/10 Lucerne	LAST	W9A10YANA_IRR	-35.5	20	1.570754717	-2.811320755	YANA	3	0.94423	0.94423	NA	0.94423	0.94423	5	0.94423	0.94423	0.94423	0.94423	NA	0.94423	4	0.94423	0.94423	0.94423	NA	0.94423	2	0.94423	NA	0.94423	0.94423
789	70803	ROSELLA	120963	2010	969	3	7	23	W9A10COLE	2755	37	19	2	3	RFD	1.8207	g/100g	27/10/10 Lucerne	LAST	W9A10COLE_RFD	-19.5	10.5	1.570754717	-2.811320755	COLE	4	1.8207	1.8207	1.8207	NA	1.8207	5	1.8207	1.8207	1.8207	1.8207	NA	1.8207	1	NA	1.8207	1.8207	1.8207	1.8207	3	1.8207	1.8207	NA	1.8207
790	70804	CHARA	119216	2010	355	3	7	24	W9A10COLE	1008	14	20	1	2	RFD	1.7615	g/100g	19/10/2010	LAST	W9A10COLE_RFD	-18.5	-12.5	1.570754717	-2.811320755	COLE	5	1.7615	1.7615	1.7615	1.7615	NA	4	1.7615	1.7615	1.7615	NA	1.7615	1.7615	5	1.7615	1.7615	1.7615	1.7615	NA	5	1.7615	1.7615	1.7615	1.7615
791	70805	VW3466	119966	2010	624	3	7	25	W9A10COLE	1758	24	10	1	2	RFD	1.918	g/100g	19/10/2010	LAST	W9A10COLE_RFD	-28.5	-2.5	1.570754717	-2.811320755	COLE	1	NA	1.918	1.918	1.918	1.918	3	1.918	1.918	NA	1.918	1.918	1.918	4	1.918	1.918	1.918	NA	1.918	3	1.918	1.918	NA	1.918
792	70806	WW19561	124843	2010	2329	3	7	26	W9A10YANA	2683	31	43	1	2	RFD	1.5384	g/100g	23/10/10 Hurricane	LAST	W9A10YANA_RFD	-1.5	8	1.570754717	-2.811320755	YANA	5	1.5384	1.5384	1.5384	1.5384	NA	2	1.5384	NA	1.5384	1.5384	1.5384	1.5384	2	1.5384	NA	1.5384	1.5384	1.5384	4	1.5384	1.5384	1.5384	NA
793	70807	WW20256	122067	2010	1355	3	7	27	W9A10COLE	3859	51	59	2	4	IRR	1.5811	g/100g	27/10/10 Lucerne	LAST	W9A10COLE_IRR	20.5	24.5	1.570754717	-2.811320755	COLE	2	1.5811	NA	1.5811	1.5811	1.5811	5	1.5811	1.5811	1.5811	1.5811	NA	1.5811	2	1.5811	NA	1.5811	1.5811	1.5811	1	NA	1.5811	1.5811	1.5811
794	70808	HRZ04_0231	118499	2010	93	3	7	28	W9A10COLE	291	4	63	1	1	IRR	1.5328	g/100g	19/10/2010	LAST	W9A10COLE_IRR	24.5	-22.5	1.570754717	-2.811320755	COLE	5	1.5328	1.5328	1.5328	1.5328	NA	1	NA	1.5328	1.5328	1.5328	1.5328	1.5328	5	1.5328	1.5328	1.5328	1.5328	NA	2	1.5328	NA	1.5328	1.5328
795	70809	VW2405	118550	2010	110	3	7	29	W9A10COLE	342	5	38	1	1	IRR	2.1087	g/100g	23/10/10 Lucerne	LAST	W9A10COLE_IRR	-0.5	-21.5	1.570754717	-2.811320755	COLE	2	2.1087	NA	2.1087	2.1087	2.1087	3	2.1087	2.1087	NA	2.1087	2.1087	2.1087	5	2.1087	2.1087	2.1087	2.1087	NA	1	NA	2.1087	2.1087	2.1087
796	70810	RAC1393	122593	2010	1540	3	7	30	W9A10YANA	433	5	81	2	4	IRR	2.0454	g/100g	30/10/10 Hurricane	LAST	W9A10YANA_IRR	36.5	-18	1.570754717	-2.811320755	YANA	3	2.0454	2.0454	NA	2.0454	2.0454	4	2.0454	2.0454	2.0454	NA	2.0454	2.0454	1	NA	2.0454	2.0454	2.0454	2.0454	5	2.0454	2.0454	2.0454	2.0454
797	70811	VW1174	125481	2010	2559	3	8	1	W9A10YANA	3321	38	65	2	3	RFD	2.094	g/100g	30/10/10 Lucerne	LAST	W9A10YANA_RFD	20.5	15	2.570754717	-2.811320755	YANA	3	2.094	2.094	NA	2.094	2.094	4	2.094	2.094	2.094	NA	2.094	2.094	1	NA	2.094	2.094	2.094	2.094	5	2.094	2.094	2.094	2.094
798	70812	VV2321	123897	2010	2004	3	8	2	W9A10YANA	1737	20	65	2	3	RFD	1.7582	g/100g	30/10/10 Hurricane	LAST	W9A10YANA_RFD	20.5	-3	2.570754717	-2.811320755	YANA	1	NA	1.7582	1.7582	1.7582	1.7582	4	1.7582	1.7582	1.7582	NA	1.7582	1.7582	1	NA	1.7582	1.7582	1.7582	1.7582	5	1.7582	1.7582	1.7582	1.7582
799	70813	LPB04_2172	122509	2010	1513	3	8	3	W9A10YANA	349	4	85	2	4	IRR	2.4503	g/100g	30/10/10 Lucerne	LAST	W9A10YANA_IRR	40.5	-19	2.570754717	-2.811320755	YANA	1	NA	2.4503	2.4503	2.4503	2.4503	4	2.4503	2.4503	2.4503	NA	2.4503	2.4503	2	2.4503	NA	2.4503	2.4503	2.4503	1	NA	2.4503	2.4503	2.4503
800	70814	WW20256	124087	2010	2079	3	8	4	W9A10YANA	1927	22	79	2	4	IRR	1.5828	g/100g	30/10/10 Hurricane	LAST	W9A10YANA_IRR	34.5	-1	2.570754717	-2.811320755	YANA	2	1.5828	NA	1.5828	1.5828	1.5828	5	1.5828	1.5828	1.5828	1.5828	NA	1.5828	2	1.5828	NA	1.5828	1.5828	1.5828	1	NA	1.5828	1.5828	1.5828
801	70815	HRZ06_0319	123825	2010	1976	3	8	5	W9A10YANA	1665	19	81	2	4	IRR	1.9699	g/100g	30/10/10 Hurricane	LAST	W9A10YANA_IRR	36.5	-4	2.570754717	-2.811320755	YANA	2	1.9699	NA	1.9699	1.9699	1.9699	4	1.9699	1.9699	1.9699	NA	1.9699	1.9699	3	1.9699	1.9699	NA	1.9699	1.9699	3	1.9699	1.9699	NA	1.9699
802	70816	VW2324	123601	2010	1904	3	8	6	W9A10YANA	1441	17	33	1	2	RFD	2.0266	g/100g	23/10/10 Hurricane	LAST	W9A10YANA_RFD	-11.5	-6	2.570754717	-2.811320755	YANA	4	2.0266	2.0266	2.0266	NA	2.0266	3	2.0266	2.0266	NA	2.0266	2.0266	2.0266	5	2.0266	2.0266	2.0266	2.0266	NA	1	NA	2.0266	2.0266	2.0266
803	70817	HRZ06_0067	121765	2010	1241	3	8	7	W9A10COLE	3557	47	61	2	4	IRR	2.0296	g/100g	27/10/10 Lucerne	LAST	W9A10COLE_IRR	22.5	20.5	2.570754717	-2.811320755	COLE	1	NA	2.0296	2.0296	2.0296	2.0296	3	2.0296	2.0296	NA	2.0296	2.0296	2.0296	1	NA	2.0296	2.0296	2.0296	2.0296	4	2.0296	2.0296	2.0296	NA
804	70818	WW20469	118566	2010	115	3	8	8	W9A10COLE	358	5	54	1	1	IRR	1.1545	g/100g	19/10/2010	LAST	W9A10COLE_IRR	15.5	-21.5	2.570754717	-2.811320755	COLE	4	1.1545	1.1545	1.1545	NA	1.1545	4	1.1545	1.1545	1.1545	NA	1.1545	1.1545	2	1.1545	NA	1.1545	1.1545	1.1545	2	1.1545	NA	1.1545	1.1545
805	70819	WW19632	120622	2010	825	3	8	9	W9A10COLE	2414	32	58	2	3	RFD	2.2767	g/100g	27/10/10 Lucerne	LAST	W9A10COLE_RFD	19.5	5.5	2.570754717	-2.811320755	COLE	3	2.2767	2.2767	NA	2.2767	2.2767	4	2.2767	2.2767	2.2767	NA	2.2767	2.2767	3	2.2767	2.2767	NA	2.2767	2.2767	2	2.2767	NA	2.2767	2.2767
806	70820	AUS33467	124956	2010	2368	3	8	10	W9A10YANA	2796	32	68	2	4	IRR	2.2176	g/100g	30/10/10 Hurricane	LAST	W9A10YANA_IRR	23.5	9	2.570754717	-2.811320755	YANA	1	NA	2.2176	2.2176	2.2176	2.2176	1	NA	2.2176	2.2176	2.2176	2.2176	2.2176	3	2.2176	2.2176	NA	2.2176	2.2176	5	2.2176	2.2176	2.2176	2.2176
807	70821	VW3708	126089	2010	2768	3	8	11	W9A10YANA	3929	45	57	2	3	RFD	1.7386	g/100g	30/10/10 Lucerne	LAST	W9A10YANA_RFD	12.5	22	2.570754717	-2.811320755	YANA	4	1.7386	1.7386	1.7386	NA	1.7386	2	1.7386	NA	1.7386	1.7386	1.7386	1.7386	2	1.7386	NA	1.7386	1.7386	1.7386	4	1.7386	1.7386	1.7386	NA
808	70822	WW20665	123629	2010	1911	3	8	12	W9A10YANA	1469	17	61	2	3	RFD	1.8875	g/100g	30/10/10 Lucerne	LAST	W9A10YANA_RFD	16.5	-6	2.570754717	-2.811320755	YANA	1	NA	1.8875	1.8875	1.8875	1.8875	5	1.8875	1.8875	1.8875	1.8875	NA	1.8875	3	1.8875	1.8875	NA	1.8875	1.8875	4	1.8875	1.8875	1.8875	NA
809	70823	HRZ06_0034	123388	2010	1827	3	8	13	W9A10YANA	1228	14	84	2	4	IRR	1.419	g/100g	30/10/10 Hurricane	LAST	W9A10YANA_IRR	39.5	-9	2.570754717	-2.811320755	YANA	3	1.419	1.419	NA	1.419	1.419	1	NA	1.419	1.419	1.419	1.419	1.419	1	NA	1.419	1.419	1.419	1.419	3	1.419	1.419	NA	1.419
810	70824	DAKOTA	124300	2010	2148	3	8	14	W9A10YANA	2140	25	28	1	2	RFD	2.5881	g/100g	23/10/10 Hurricane	LAST	W9A10YANA_RFD	-16.5	2	2.570754717	-2.811320755	YANA	2	2.5881	NA	2.5881	2.5881	2.5881	5	2.5881	2.5881	2.5881	2.5881	NA	2.5881	1	NA	2.5881	2.5881	2.5881	2.5881	1	NA	2.5881	2.5881	2.5881
811	70825	VV2678	120748	2010	878	3	8	15	W9A10COLE	2540	34	32	2	3	RFD	2.4496	g/100g	27/10/10 Lucerne	LAST	W9A10COLE_RFD	-6.5	7.5	2.570754717	-2.811320755	COLE	1	NA	2.4496	2.4496	2.4496	2.4496	2	2.4496	NA	2.4496	2.4496	2.4496	2.4496	3	2.4496	2.4496	NA	2.4496	2.4496	1	NA	2.4496	2.4496	2.4496
812	70826	CATALINA	123494	2010	1864	3	8	16	W9A10YANA	1334	16	14	1	1	IRR	2.0388	g/100g	23/10/10 Lucerne	LAST	W9A10YANA_IRR	-30.5	-7	2.570754717	-2.811320755	YANA	4	2.0388	2.0388	2.0388	NA	2.0388	4	2.0388	2.0388	2.0388	NA	2.0388	2.0388	4	2.0388	2.0388	2.0388	NA	2.0388	4	2.0388	2.0388	2.0388	NA
813	70827	WW18949	118827	2010	198	3	8	17	W9A10COLE	619	9	11	1	1	IRR	2.1108	g/100g	12/10/2010	LAST	W9A10COLE_IRR	-27.5	-17.5	2.570754717	-2.811320755	COLE	5	2.1108	2.1108	2.1108	2.1108	NA	3	2.1108	2.1108	NA	2.1108	2.1108	2.1108	2	2.1108	NA	2.1108	2.1108	2.1108	4	2.1108	2.1108	2.1108	NA
814	70828	WW13710	125545	2010	2575	3	8	18	W9A10YANA	3385	39	41	1	2	RFD	2.3154	g/100g	23/10/10 Hurricane	LAST	W9A10YANA_RFD	-3.5	16	2.570754717	-2.811320755	YANA	5	2.3154	2.3154	2.3154	2.3154	NA	4	2.3154	2.3154	2.3154	NA	2.3154	2.3154	4	2.3154	2.3154	2.3154	NA	2.3154	1	NA	2.3154	2.3154	2.3154
815	70829	QT13626	124535	2010	2230	3	8	19	W9A10YANA	2375	27	87	2	4	IRR	1.879	g/100g	30/10/10 Hurricane	LAST	W9A10YANA_IRR	42.5	4	2.570754717	-2.811320755	YANA	1	NA	1.879	1.879	1.879	1.879	1	NA	1.879	1.879	1.879	1.879	1.879	2	1.879	NA	1.879	1.879	1.879	3	1.879	1.879	NA	1.879
816	70830	JANZ	119221	2010	360	3	8	20	W9A10COLE	1013	14	25	1	2	RFD	2.1634	g/100g	19/10/2010	LAST	W9A10COLE_RFD	-13.5	-12.5	2.570754717	-2.811320755	COLE	3	2.1634	2.1634	NA	2.1634	2.1634	3	2.1634	2.1634	NA	2.1634	2.1634	2.1634	5	2.1634	2.1634	2.1634	2.1634	NA	1	NA	2.1634	2.1634	2.1634
817	70831	HRZ05_0101	122767	2010	1601	3	8	21	W9A10YANA	607	7	79	2	4	IRR	1.9295	g/100g	30/10/10 Hurricane	LAST	W9A10YANA_IRR	34.5	-16	2.570754717	-2.811320755	YANA	3	1.9295	1.9295	NA	1.9295	1.9295	5	1.9295	1.9295	1.9295	1.9295	NA	1.9295	3	1.9295	1.9295	NA	1.9295	1.9295	2	1.9295	NA	1.9295	1.9295
818	70832	HRZ06_0319	122125	2010	1375	3	8	22	W9A10COLE	3917	52	41	2	4	IRR	1.401	g/100g	27/10/10 Lucerne	LAST	W9A10COLE_IRR	2.5	25.5	2.570754717	-2.811320755	COLE	2	1.401	NA	1.401	1.401	1.401	4	1.401	1.401	1.401	NA	1.401	1.401	3	1.401	1.401	NA	1.401	1.401	3	1.401	1.401	NA	1.401
819	70833	WAGT025	124311	2010	2152	3	8	23	W9A10YANA	2151	25	39	1	2	RFD	2.1033	g/100g	23/10/10 Hurricane	LAST	W9A10YANA_RFD	-5.5	2	2.570754717	-2.811320755	YANA	4	2.1033	2.1033	2.1033	NA	2.1033	1	NA	2.1033	2.1033	2.1033	2.1033	2.1033	4	2.1033	2.1033	2.1033	NA	2.1033	3	2.1033	2.1033	NA	2.1033
820	70834	WW19127	118911	2010	229	3	8	24	W9A10COLE	703	10	19	1	1	IRR	1.8229	g/100g	19/10/2010	LAST	W9A10COLE_IRR	-19.5	-16.5	2.570754717	-2.811320755	COLE	1	NA	1.8229	1.8229	1.8229	1.8229	5	1.8229	1.8229	1.8229	1.8229	NA	1.8229	2	1.8229	NA	1.8229	1.8229	1.8229	3	1.8229	1.8229	NA	1.8229
821	70835	HRZ06_0034	122818	2010	1617	3	8	25	W9A10YANA	658	8	42	1	2	RFD	2.3603	g/100g	23/10/10 Hurricane	LAST	W9A10YANA_RFD	-2.5	-15	2.570754717	-2.811320755	YANA	3	2.3603	2.3603	NA	2.3603	2.3603	1	NA	2.3603	2.3603	2.3603	2.3603	2.3603	1	NA	2.3603	2.3603	2.3603	2.3603	3	2.3603	2.3603	NA	2.3603
822	70836	WW20665	125621	2010	2600	3	8	26	W9A10YANA	3461	40	29	1	2	RFD	2.4053	g/100g	23/10/10 Hurricane	LAST	W9A10YANA_RFD	-15.5	17	2.570754717	-2.811320755	YANA	1	NA	2.4053	2.4053	2.4053	2.4053	5	2.4053	2.4053	2.4053	2.4053	NA	2.4053	3	2.4053	2.4053	NA	2.4053	2.4053	4	2.4053	2.4053	2.4053	NA
823	70837	WW20558	122290	2010	1439	3	8	27	W9A10YANA	130	2	42	1	2	RFD	2.0814	g/100g	23/10/10 Hurricane	LAST	W9A10YANA_RFD	-2.5	-21	2.570754717	-2.811320755	YANA	2	2.0814	NA	2.0814	2.0814	2.0814	1	NA	2.0814	2.0814	2.0814	2.0814	2.0814	5	2.0814	2.0814	2.0814	2.0814	NA	5	2.0814	2.0814	2.0814	2.0814
824	70838	HRZ04_0231	122549	2010	1526	3	8	28	W9A10YANA	389	5	37	1	2	RFD	1.785	g/100g	23/10/10 Lucerne	LAST	W9A10YANA_RFD	-7.5	-18	2.570754717	-2.811320755	YANA	5	1.785	1.785	1.785	1.785	NA	1	NA	1.785	1.785	1.785	1.785	1.785	5	1.785	1.785	1.785	1.785	NA	2	1.785	NA	1.785	1.785
825	70839	CRUSADER	119134	2010	320	3	8	29	W9A10COLE	926	13	14	1	1	IRR	2.6334	g/100g	12/10/2010	LAST	W9A10COLE_IRR	-24.5	-13.5	2.570754717	-2.811320755	COLE	2	2.6334	NA	2.6334	2.6334	2.6334	1	NA	2.6334	2.6334	2.6334	2.6334	2.6334	4	2.6334	2.6334	2.6334	NA	2.6334	2	2.6334	NA	2.6334	2.6334
826	70840	WW19746	119959	2010	622	3	8	30	W9A10COLE	1751	24	3	1	2	RFD	1.7843	g/100g	12/10/2010	LAST	W9A10COLE_RFD	-35.5	-2.5	2.570754717	-2.811320755	COLE	4	1.7843	1.7843	1.7843	NA	1.7843	4	1.7843	1.7843	1.7843	NA	1.7843	1.7843	4	1.7843	1.7843	1.7843	NA	1.7843	2	1.7843	NA	1.7843	1.7843
827	70841	VW4326	122782	2010	1605	3	9	1	W9A10YANA	622	8	6	1	1	IRR	1.4788	g/100g	23/10/10 Hurricane	LAST	W9A10YANA_IRR	-38.5	-15	3.570754717	-2.811320755	YANA	3	1.4788	1.4788	NA	1.4788	1.4788	4	1.4788	1.4788	1.4788	NA	1.4788	1.4788	3	1.4788	1.4788	NA	1.4788	1.4788	2	1.4788	NA	1.4788	1.4788
828	70842	HRZ06_0323	121573	2010	1179	3	9	2	W9A10COLE	3365	45	21	2	4	IRR	1.5697	g/100g	27/10/10 Hurricane	LAST	W9A10COLE_IRR	-17.5	18.5	3.570754717	-2.811320755	COLE	3	1.5697	1.5697	NA	1.5697	1.5697	2	1.5697	NA	1.5697	1.5697	1.5697	1.5697	3	1.5697	1.5697	NA	1.5697	1.5697	1	NA	1.5697	1.5697	1.5697
829	70843	WW19743	124420	2010	2194	3	9	3	W9A10YANA	2260	26	60	2	3	RFD	1.8259	g/100g	30/10/10 Hurricane	LAST	W9A10YANA_RFD	15.5	3	3.570754717	-2.811320755	YANA	5	1.8259	1.8259	1.8259	1.8259	NA	3	1.8259	1.8259	NA	1.8259	1.8259	1.8259	2	1.8259	NA	1.8259	1.8259	1.8259	3	1.8259	1.8259	NA	1.8259
830	70844	QT13626	119445	2010	454	3	9	4	W9A10COLE	1237	17	21	1	2	RFD	1.644	g/100g	19/10/2010	LAST	W9A10COLE_RFD	-17.5	-9.5	3.570754717	-2.811320755	COLE	1	NA	1.644	1.644	1.644	1.644	1	NA	1.644	1.644	1.644	1.644	1.644	2	1.644	NA	1.644	1.644	1.644	3	1.644	1.644	NA	1.644
831	70845	HRZ03_0005	120555	2010	804	3	9	5	W9A10COLE	2347	31	67	2	3	RFD	2.0653	g/100g	27/10/10 Lucerne	LAST	W9A10COLE_RFD	28.5	4.5	3.570754717	-2.811320755	COLE	1	NA	2.0653	2.0653	2.0653	2.0653	4	2.0653	2.0653	2.0653	NA	2.0653	2.0653	5	2.0653	2.0653	2.0653	2.0653	NA	5	2.0653	2.0653	2.0653	2.0653
832	70846	VW2708	119944	2010	618	3	9	6	W9A10COLE	1736	23	64	1	2	RFD	2.7758	g/100g	12/10/2010	LAST	W9A10COLE_RFD	25.5	-3.5	3.570754717	-2.811320755	COLE	3	2.7758	2.7758	NA	2.7758	2.7758	1	NA	2.7758	2.7758	2.7758	2.7758	2.7758	5	2.7758	2.7758	2.7758	2.7758	NA	4	2.7758	2.7758	2.7758	NA
833	70847	QT12667	121544	2010	1174	3	9	7	W9A10COLE	3336	44	68	2	4	IRR	1.6694	g/100g	27/10/10 Lucerne	LAST	W9A10COLE_IRR	29.5	17.5	3.570754717	-2.811320755	COLE	3	1.6694	1.6694	NA	1.6694	1.6694	2	1.6694	NA	1.6694	1.6694	1.6694	1.6694	1	NA	1.6694	1.6694	1.6694	1.6694	5	1.6694	1.6694	1.6694	1.6694
834	70848	R901D	124384	2010	2182	3	9	8	W9A10YANA	2224	26	24	1	2	RFD	2.2091	g/100g	23/10/10 Hurricane	LAST	W9A10YANA_RFD	-20.5	3	3.570754717	-2.811320755	YANA	1	NA	2.2091	2.2091	2.2091	2.2091	1	NA	2.2091	2.2091	2.2091	2.2091	2.2091	1	NA	2.2091	2.2091	2.2091	2.2091	3	2.2091	2.2091	NA	2.2091
835	70849	SUNVALE	122623	2010	1555	3	9	9	W9A10YANA	463	6	23	1	2	RFD	1.6626	g/100g	23/10/10 Lucerne	LAST	W9A10YANA_RFD	-21.5	-17	3.570754717	-2.811320755	YANA	2	1.6626	NA	1.6626	1.6626	1.6626	1	NA	1.6626	1.6626	1.6626	1.6626	1.6626	5	1.6626	1.6626	1.6626	1.6626	NA	3	1.6626	1.6626	NA	1.6626
836	70850	LPB04_2324	119154	2010	332	3	9	10	W9A10COLE	946	13	34	1	1	IRR	2.0126	g/100g	12/10/2010	LAST	W9A10COLE_IRR	-4.5	-13.5	3.570754717	-2.811320755	COLE	2	2.0126	NA	2.0126	2.0126	2.0126	3	2.0126	2.0126	NA	2.0126	2.0126	2.0126	5	2.0126	2.0126	2.0126	2.0126	NA	2	2.0126	NA	2.0126	2.0126
837	70851	WW19365	123096	2010	1723	3	9	11	W9A10YANA	936	11	56	2	3	RFD	2.0862	g/100g	30/10/10 Hurricane	LAST	W9A10YANA_RFD	11.5	-12	3.570754717	-2.811320755	YANA	5	2.0862	2.0862	2.0862	2.0862	NA	4	2.0862	2.0862	2.0862	NA	2.0862	2.0862	1	NA	2.0862	2.0862	2.0862	2.0862	2	2.0862	NA	2.0862	2.0862
838	70852	114892_109	125527	2010	2570	3	9	12	W9A10YANA	3367	39	23	1	2	RFD	2.3433	g/100g	23/10/10 Hurricane	LAST	W9A10YANA_RFD	-21.5	16	3.570754717	-2.811320755	YANA	1	NA	2.3433	2.3433	2.3433	2.3433	3	2.3433	2.3433	NA	2.3433	2.3433	2.3433	5	2.3433	2.3433	2.3433	2.3433	NA	5	2.3433	2.3433	2.3433	2.3433
839	70853	WW20664	122654	2010	1562	3	9	13	W9A10YANA	494	6	54	2	3	RFD	2.072	g/100g	30/10/10 Lucerne	LAST	W9A10YANA_RFD	9.5	-17	3.570754717	-2.811320755	YANA	3	2.072	2.072	NA	2.072	2.072	3	2.072	2.072	NA	2.072	2.072	2.072	2	2.072	NA	2.072	2.072	2.072	4	2.072	2.072	2.072	NA
840	70854	WW18569	119423	2010	447	3	9	14	W9A10COLE	1215	16	75	1	2	RFD	1.308	g/100g	12/10/2010	LAST	W9A10COLE_RFD	36.5	-10.5	3.570754717	-2.811320755	COLE	5	1.308	1.308	1.308	1.308	NA	2	1.308	NA	1.308	1.308	1.308	1.308	1	NA	1.308	1.308	1.308	1.308	5	1.308	1.308	1.308	1.308
841	70855	AUS33467	122276	2010	1433	3	9	15	W9A10YANA	116	2	28	1	2	RFD	2.8951	g/100g	23/10/10 Hurricane	LAST	W9A10YANA_RFD	-16.5	-21	3.570754717	-2.811320755	YANA	1	NA	2.8951	2.8951	2.8951	2.8951	1	NA	2.8951	2.8951	2.8951	2.8951	2.8951	3	2.8951	2.8951	NA	2.8951	2.8951	5	2.8951	2.8951	2.8951	2.8951
842	70856	WAGT025	123640	2010	1914	3	9	16	W9A10YANA	1480	17	72	2	4	IRR	1.9081	g/100g	30/10/10 Hurricane	LAST	W9A10YANA_IRR	27.5	-6	3.570754717	-2.811320755	YANA	4	1.9081	1.9081	1.9081	NA	1.9081	1	NA	1.9081	1.9081	1.9081	1.9081	1.9081	4	1.9081	1.9081	1.9081	NA	1.9081	3	1.9081	1.9081	NA	1.9081
843	70857	HRZ04_0157	122038	2010	1344	3	9	17	W9A10COLE	3830	51	30	2	4	IRR	2.2458	g/100g	27/10/10 Lucerne	LAST	W9A10COLE_IRR	-8.5	24.5	3.570754717	-2.811320755	COLE	2	2.2458	NA	2.2458	2.2458	2.2458	5	2.2458	2.2458	2.2458	2.2458	NA	2.2458	2	2.2458	NA	2.2458	2.2458	2.2458	3	2.2458	2.2458	NA	2.2458
844	70858	VW3397	121038	2010	1000	3	9	18	W9A10COLE	2830	38	18	2	3	RFD	2.7496	g/100g	27/10/10 Lucerne	LAST	W9A10COLE_RFD	-20.5	11.5	3.570754717	-2.811320755	COLE	1	NA	2.7496	2.7496	2.7496	2.7496	5	2.7496	2.7496	2.7496	2.7496	NA	2.7496	5	2.7496	2.7496	2.7496	2.7496	NA	4	2.7496	2.7496	2.7496	NA
845	70859	HRZ04_0515	119407	2010	441	3	9	19	W9A10COLE	1199	16	59	1	2	RFD	1.6709	g/100g	19/10/2010	LAST	W9A10COLE_RFD	20.5	-10.5	3.570754717	-2.811320755	COLE	5	1.6709	1.6709	1.6709	1.6709	NA	3	1.6709	1.6709	NA	1.6709	1.6709	1.6709	5	1.6709	1.6709	1.6709	1.6709	NA	5	1.6709	1.6709	1.6709	1.6709
846	70860	90670_91	125287	2010	2489	3	9	20	W9A10YANA	3127	36	47	2	3	RFD	1.9896	g/100g	30/10/10 Lucerne	LAST	W9A10YANA_RFD	2.5	13	3.570754717	-2.811320755	YANA	1	NA	1.9896	1.9896	1.9896	1.9896	2	1.9896	NA	1.9896	1.9896	1.9896	1.9896	1	NA	1.9896	1.9896	1.9896	1.9896	1	NA	1.9896	1.9896	1.9896
847	70861	SUN562A	120809	2010	896	3	9	21	W9A10COLE	2601	35	17	2	3	RFD	1.8002	g/100g	27/10/10 Lucerne	LAST	W9A10COLE_RFD	-21.5	8.5	3.570754717	-2.811320755	COLE	4	1.8002	1.8002	1.8002	NA	1.8002	3	1.8002	1.8002	NA	1.8002	1.8002	1.8002	1	NA	1.8002	1.8002	1.8002	1.8002	2	1.8002	NA	1.8002	1.8002
848	70862	WW17062	122371	2010	1469	3	9	22	W9A10YANA	211	3	35	1	2	RFD	1.8583	g/100g	23/10/10 Lucerne	LAST	W9A10YANA_RFD	-9.5	-20	3.570754717	-2.811320755	YANA	1	NA	1.8583	1.8583	1.8583	1.8583	1	NA	1.8583	1.8583	1.8583	1.8583	1.8583	5	1.8583	1.8583	1.8583	1.8583	NA	3	1.8583	1.8583	NA	1.8583
849	70863	WAGT025	120733	2010	870	3	9	23	W9A10COLE	2525	34	17	2	3	RFD	1.9503	g/100g	27/10/10 Lucerne	LAST	W9A10COLE_RFD	-21.5	7.5	3.570754717	-2.811320755	COLE	4	1.9503	1.9503	1.9503	NA	1.9503	1	NA	1.9503	1.9503	1.9503	1.9503	1.9503	4	1.9503	1.9503	1.9503	NA	1.9503	3	1.9503	1.9503	NA	1.9503
850	70864	WW20140	119366	2010	431	3	9	24	W9A10COLE	1158	16	18	1	2	RFD	2.2315	g/100g	19/10/2010	LAST	W9A10COLE_RFD	-20.5	-10.5	3.570754717	-2.811320755	COLE	3	2.2315	2.2315	NA	2.2315	2.2315	4	2.2315	2.2315	2.2315	NA	2.2315	2.2315	4	2.2315	2.2315	2.2315	NA	2.2315	5	2.2315	2.2315	2.2315	2.2315
851	70865	WW13710	119653	2010	518	3	9	25	W9A10COLE	1445	20	1	1	2	RFD	1.6296	g/100g	19/10/2010	LAST	W9A10COLE_RFD	-37.5	-6.5	3.570754717	-2.811320755	COLE	5	1.6296	1.6296	1.6296	1.6296	NA	4	1.6296	1.6296	1.6296	NA	1.6296	1.6296	4	1.6296	1.6296	1.6296	NA	1.6296	1	NA	1.6296	1.6296	1.6296
852	70866	VW3405	124950	2010	2364	3	9	26	W9A10YANA	2790	32	62	2	3	RFD	1.9116	g/100g	30/10/10 Lucerne	LAST	W9A10YANA_RFD	17.5	9	3.570754717	-2.811320755	YANA	3	1.9116	1.9116	NA	1.9116	1.9116	3	1.9116	1.9116	NA	1.9116	1.9116	1.9116	1	NA	1.9116	1.9116	1.9116	1.9116	5	1.9116	1.9116	1.9116	1.9116
853	70867	VV2321	118398	2010	55	3	9	27	W9A10COLE	190	3	38	1	1	IRR	1.0503	g/100g	23/10/10 Lucerne	LAST	W9A10COLE_IRR	-0.5	-23.5	3.570754717	-2.811320755	COLE	1	NA	1.0503	1.0503	1.0503	1.0503	4	1.0503	1.0503	1.0503	NA	1.0503	1.0503	1	NA	1.0503	1.0503	1.0503	1.0503	5	1.0503	1.0503	1.0503	1.0503
854	70868	VW3174	119829	2010	577	3	9	28	W9A10COLE	1621	22	25	1	2	RFD	1.8471	g/100g	12/10/2010	LAST	W9A10COLE_RFD	-13.5	-4.5	3.570754717	-2.811320755	COLE	1	NA	1.8471	1.8471	1.8471	1.8471	3	1.8471	1.8471	NA	1.8471	1.8471	1.8471	4	1.8471	1.8471	1.8471	NA	1.8471	1	NA	1.8471	1.8471	1.8471
855	70869	HRZ04_0227	122032	2010	1340	3	9	29	W9A10COLE	3824	51	24	2	4	IRR	2.3625	g/100g	27/10/10 Lucerne	LAST	W9A10COLE_IRR	-14.5	24.5	3.570754717	-2.811320755	COLE	1	NA	2.3625	2.3625	2.3625	2.3625	4	2.3625	2.3625	2.3625	NA	2.3625	2.3625	2	2.3625	NA	2.3625	2.3625	2.3625	2	2.3625	NA	2.3625	2.3625
856	70870	HRZ06_0491	122637	2010	1559	3	9	30	W9A10YANA	477	6	37	1	2	RFD	3.0342	g/100g	23/10/10 Lucerne	LAST	W9A10YANA_RFD	-7.5	-17	3.570754717	-2.811320755	YANA	3	3.0342	3.0342	NA	3.0342	3.0342	4	3.0342	3.0342	3.0342	NA	3.0342	3.0342	2	3.0342	NA	3.0342	3.0342	3.0342	3	3.0342	3.0342	NA	3.0342
857	70871	WW21842	125018	2010	2389	3	10	1	W9A10YANA	2858	33	42	1	2	RFD	2.3933	g/100g	23/10/10 Hurricane	LAST	W9A10YANA_RFD	-2.5	10	4.570754717	-2.811320755	YANA	1	NA	2.3933	2.3933	2.3933	2.3933	3	2.3933	2.3933	NA	2.3933	2.3933	2.3933	5	2.3933	2.3933	2.3933	2.3933	NA	3	2.3933	2.3933	NA	2.3933
858	70872	WW20667	125325	2010	2500	3	10	2	W9A10YANA	3165	36	85	2	4	IRR	2.4375	g/100g	30/10/10 Hurricane	LAST	W9A10YANA_IRR	40.5	13	4.570754717	-2.811320755	YANA	2	2.4375	NA	2.4375	2.4375	2.4375	2	2.4375	NA	2.4375	2.4375	2.4375	2.4375	4	2.4375	2.4375	2.4375	NA	2.4375	5	2.4375	2.4375	2.4375	2.4375
859	70873	EGA_WEDGETAIL	119175	2010	340	3	10	3	W9A10COLE	967	13	55	1	1	IRR	1.6641	g/100g	12/10/2010	LAST	W9A10COLE_IRR	16.5	-13.5	4.570754717	-2.811320755	COLE	5	1.6641	1.6641	1.6641	1.6641	NA	3	1.6641	1.6641	NA	1.6641	1.6641	1.6641	5	1.6641	1.6641	1.6641	1.6641	NA	3	1.6641	1.6641	NA	1.6641
860	70874	WAGT023	123052	2010	1712	3	10	4	W9A10YANA	892	11	12	1	1	IRR	2.2205	g/100g	23/10/10 Hurricane	LAST	W9A10YANA_IRR	-32.5	-12	4.570754717	-2.811320755	YANA	5	2.2205	2.2205	2.2205	2.2205	NA	5	2.2205	2.2205	2.2205	2.2205	NA	2.2205	5	2.2205	2.2205	2.2205	2.2205	NA	3	2.2205	2.2205	NA	2.2205
861	70875	AUS33467	120939	2010	953	3	10	5	W9A10COLE	2731	36	71	2	3	RFD	2.2003	g/100g	27/10/10 Lucerne	LAST	W9A10COLE_RFD	32.5	9.5	4.570754717	-2.811320755	COLE	1	NA	2.2003	2.2003	2.2003	2.2003	1	NA	2.2003	2.2003	2.2003	2.2003	2.2003	3	2.2003	2.2003	NA	2.2003	2.2003	5	2.2003	2.2003	2.2003	2.2003
862	70876	WAGT033	123882	2010	1998	3	10	6	W9A10YANA	1722	20	50	2	3	RFD	2.1189	g/100g	30/10/10 Hurricane	LAST	W9A10YANA_RFD	5.5	-3	4.570754717	-2.811320755	YANA	2	2.1189	NA	2.1189	2.1189	2.1189	2	2.1189	NA	2.1189	2.1189	2.1189	2.1189	4	2.1189	2.1189	2.1189	NA	2.1189	2	2.1189	NA	2.1189	2.1189
863	70877	WW21573	123938	2010	2019	3	10	7	W9A10YANA	1778	21	18	1	1	IRR	2.1871	g/100g	23/10/10 Lucerne	LAST	W9A10YANA_IRR	-26.5	-2	4.570754717	-2.811320755	YANA	1	NA	2.1871	2.1871	2.1871	2.1871	1	NA	2.1871	2.1871	2.1871	2.1871	2.1871	5	2.1871	2.1871	2.1871	2.1871	NA	5	2.1871	2.1871	2.1871	2.1871
864	70878	WW21842	121842	2010	1273	3	10	8	W9A10COLE	3634	48	62	2	4	IRR	1.9226	g/100g	27/10/10 Lucerne	LAST	W9A10COLE_IRR	23.5	21.5	4.570754717	-2.811320755	COLE	1	NA	1.9226	1.9226	1.9226	1.9226	3	1.9226	1.9226	NA	1.9226	1.9226	1.9226	5	1.9226	1.9226	1.9226	1.9226	NA	3	1.9226	1.9226	NA	1.9226
865	70879	VW1256	118232	2010	8	3	10	9	W9A10COLE	24	1	24	1	1	IRR	0.82114	g/100g	12/10/2010	LAST	W9A10COLE_IRR	-14.5	-25.5	4.570754717	-2.811320755	COLE	1	NA	0.82114	0.82114	0.82114	0.82114	1	NA	0.82114	0.82114	0.82114	0.82114	0.82114	5	0.82114	0.82114	0.82114	0.82114	NA	5	0.82114	0.82114	0.82114	0.82114
866	70880	LPB03_1109	122946	2010	1668	3	10	10	W9A10YANA	786	9	82	2	4	IRR	2.1242	g/100g	30/10/10 Lucerne	LAST	W9A10YANA_IRR	37.5	-14	4.570754717	-2.811320755	YANA	1	NA	2.1242	2.1242	2.1242	2.1242	5	2.1242	2.1242	2.1242	2.1242	NA	2.1242	4	2.1242	2.1242	2.1242	NA	2.1242	1	NA	2.1242	2.1242	2.1242
867	70881	WW19864	120752	2010	880	3	10	11	W9A10COLE	2544	34	36	2	3	RFD	1.971	g/100g	27/10/10 Lucerne	LAST	W9A10COLE_RFD	-2.5	7.5	4.570754717	-2.811320755	COLE	2	1.971	NA	1.971	1.971	1.971	2	1.971	NA	1.971	1.971	1.971	1.971	1	NA	1.971	1.971	1.971	1.971	5	1.971	1.971	1.971	1.971
868	70882	VW0222	121283	2010	1072	3	10	12	W9A10COLE	3075	41	35	2	4	IRR	1.4982	g/100g	27/10/10 Hurricane	LAST	W9A10COLE_IRR	-3.5	14.5	4.570754717	-2.811320755	COLE	2	1.4982	NA	1.4982	1.4982	1.4982	1	NA	1.4982	1.4982	1.4982	1.4982	1.4982	1	NA	1.4982	1.4982	1.4982	1.4982	2	1.4982	NA	1.4982	1.4982
869	70883	VW0857	122876	2010	1640	3	10	13	W9A10YANA	716	9	12	1	1	IRR	2.27	g/100g	23/10/10 Lucerne	LAST	W9A10YANA_IRR	-32.5	-14	4.570754717	-2.811320755	YANA	5	2.27	2.27	2.27	2.27	NA	2	2.27	NA	2.27	2.27	2.27	2.27	4	2.27	2.27	2.27	NA	2.27	4	2.27	2.27	2.27	NA
870	70884	WW19884	119747	2010	548	3	10	14	W9A10COLE	1539	21	19	1	2	RFD	2.6263	g/100g	12/10/2010	LAST	W9A10COLE_RFD	-19.5	-5.5	4.570754717	-2.811320755	COLE	1	NA	2.6263	2.6263	2.6263	2.6263	3	2.6263	2.6263	NA	2.6263	2.6263	2.6263	2	2.6263	NA	2.6263	2.6263	2.6263	2	2.6263	NA	2.6263	2.6263
871	70885	WW19891	121430	2010	1128	3	10	15	W9A10COLE	3222	43	30	2	4	IRR	1.478	g/100g	27/10/10 Lucerne	LAST	W9A10COLE_IRR	-8.5	16.5	4.570754717	-2.811320755	COLE	1	NA	1.478	1.478	1.478	1.478	4	1.478	1.478	1.478	NA	1.478	1.478	1	NA	1.478	1.478	1.478	1.478	3	1.478	1.478	NA	1.478
872	70886	WW19127	122905	2010	1652	3	10	16	W9A10YANA	745	9	41	1	2	RFD	1.6842	g/100g	23/10/10 Hurricane	LAST	W9A10YANA_RFD	-3.5	-14	4.570754717	-2.811320755	YANA	1	NA	1.6842	1.6842	1.6842	1.6842	5	1.6842	1.6842	1.6842	1.6842	NA	1.6842	2	1.6842	NA	1.6842	1.6842	1.6842	3	1.6842	1.6842	NA	1.6842
873	70887	HRZ04_0191	121278	2010	1068	3	10	17	W9A10COLE	3070	41	30	2	4	IRR	1.1113	g/100g	27/10/10 Lucerne	LAST	W9A10COLE_IRR	-8.5	14.5	4.570754717	-2.811320755	COLE	5	1.1113	1.1113	1.1113	1.1113	NA	4	1.1113	1.1113	1.1113	NA	1.1113	1.1113	1	NA	1.1113	1.1113	1.1113	1.1113	3	1.1113	1.1113	NA	1.1113
874	70888	EGA_STAMPEDE	123406	2010	1836	3	10	18	W9A10YANA	1246	15	14	1	1	IRR	1.6674	g/100g	23/10/10 Lucerne	LAST	W9A10YANA_IRR	-30.5	-8	4.570754717	-2.811320755	YANA	2	1.6674	NA	1.6674	1.6674	1.6674	1	NA	1.6674	1.6674	1.6674	1.6674	1.6674	2	1.6674	NA	1.6674	1.6674	1.6674	5	1.6674	1.6674	1.6674	1.6674
875	70889	VW0394	121873	2010	1285	3	10	19	W9A10COLE	3665	49	17	2	4	IRR	2.0664	g/100g	27/10/10 Lucerne	LAST	W9A10COLE_IRR	-21.5	22.5	4.570754717	-2.811320755	COLE	2	2.0664	NA	2.0664	2.0664	2.0664	1	NA	2.0664	2.0664	2.0664	2.0664	2.0664	5	2.0664	2.0664	2.0664	2.0664	NA	2	2.0664	NA	2.0664	2.0664
876	70890	VT2474	121517	2010	1164	3	10	20	W9A10COLE	3309	44	41	2	4	IRR	1.8132	g/100g	27/10/10 Lucerne	LAST	W9A10COLE_IRR	2.5	17.5	4.570754717	-2.811320755	COLE	5	1.8132	1.8132	1.8132	1.8132	NA	5	1.8132	1.8132	1.8132	1.8132	NA	1.8132	3	1.8132	1.8132	NA	1.8132	1.8132	5	1.8132	1.8132	1.8132	1.8132
877	70891	HRZ04_0206	119770	2010	560	3	10	21	W9A10COLE	1562	21	42	1	2	RFD	1.8142	g/100g	12/10/2010	LAST	W9A10COLE_RFD	3.5	-5.5	4.570754717	-2.811320755	COLE	1	NA	1.8142	1.8142	1.8142	1.8142	1	NA	1.8142	1.8142	1.8142	1.8142	1.8142	4	1.8142	1.8142	1.8142	NA	1.8142	4	1.8142	1.8142	1.8142	NA
878	70892	LPB04_2324	125105	2010	2421	3	10	22	W9A10YANA	2945	34	41	1	2	RFD	2.3709	g/100g	23/10/10 Hurricane	LAST	W9A10YANA_RFD	-3.5	11	4.570754717	-2.811320755	YANA	2	2.3709	NA	2.3709	2.3709	2.3709	3	2.3709	2.3709	NA	2.3709	2.3709	2.3709	5	2.3709	2.3709	2.3709	2.3709	NA	2	2.3709	NA	2.3709	2.3709
879	70893	VW0385	125448	2010	2547	3	10	23	W9A10YANA	3288	38	32	1	2	RFD	2.1407	g/100g	23/10/10 Hurricane	LAST	W9A10YANA_RFD	-12.5	15	4.570754717	-2.811320755	YANA	4	2.1407	2.1407	2.1407	NA	2.1407	4	2.1407	2.1407	2.1407	NA	2.1407	2.1407	5	2.1407	2.1407	2.1407	2.1407	NA	4	2.1407	2.1407	2.1407	NA
880	70894	VW3405	120531	2010	796	3	10	24	W9A10COLE	2323	31	43	2	3	RFD	2.2441	g/100g	27/10/10 Lucerne	LAST	W9A10COLE_RFD	4.5	4.5	4.570754717	-2.811320755	COLE	3	2.2441	2.2441	NA	2.2441	2.2441	3	2.2441	2.2441	NA	2.2441	2.2441	2.2441	1	NA	2.2441	2.2441	2.2441	2.2441	5	2.2441	2.2441	2.2441	2.2441
881	70895	WW3028_4	123198	2010	1763	3	10	25	W9A10YANA	1038	12	70	2	4	IRR	1.1653	g/100g	30/10/10 Hurricane	LAST	W9A10YANA_IRR	25.5	-11	4.570754717	-2.811320755	YANA	3	1.1653	1.1653	NA	1.1653	1.1653	5	1.1653	1.1653	1.1653	1.1653	NA	1.1653	5	1.1653	1.1653	1.1653	1.1653	NA	5	1.1653	1.1653	1.1653	1.1653
882	70896	WW19987	120681	2010	854	3	10	26	W9A10COLE	2473	33	41	2	3	RFD	1.7953	g/100g	27/10/10 Lucerne	LAST	W9A10COLE_RFD	2.5	6.5	4.570754717	-2.811320755	COLE	1	NA	1.7953	1.7953	1.7953	1.7953	1	NA	1.7953	1.7953	1.7953	1.7953	1.7953	5	1.7953	1.7953	1.7953	1.7953	NA	1	NA	1.7953	1.7953	1.7953
883	70897	WW19561	125516	2010	2567	3	10	27	W9A10YANA	3356	39	12	1	1	IRR	2.0881	g/100g	23/10/10 Lucerne	LAST	W9A10YANA_IRR	-32.5	16	4.570754717	-2.811320755	YANA	5	2.0881	2.0881	2.0881	2.0881	NA	2	2.0881	NA	2.0881	2.0881	2.0881	2.0881	2	2.0881	NA	2.0881	2.0881	2.0881	4	2.0881	2.0881	2.0881	NA
884	70898	WW19891	125188	2010	2448	3	10	28	W9A10YANA	3028	35	36	1	2	RFD	2.4677	g/100g	23/10/10 Hurricane	LAST	W9A10YANA_RFD	-8.5	12	4.570754717	-2.811320755	YANA	1	NA	2.4677	2.4677	2.4677	2.4677	4	2.4677	2.4677	2.4677	NA	2.4677	2.4677	1	NA	2.4677	2.4677	2.4677	2.4677	3	2.4677	2.4677	NA	2.4677
885	70899	VW0644	122421	2010	1487	3	10	29	W9A10YANA	261	3	85	2	4	IRR	1.9792	g/100g	30/10/10 Lucerne	LAST	W9A10YANA_IRR	40.5	-20	4.570754717	-2.811320755	YANA	5	1.9792	1.9792	1.9792	1.9792	NA	1	NA	1.9792	1.9792	1.9792	1.9792	1.9792	3	1.9792	1.9792	NA	1.9792	1.9792	4	1.9792	1.9792	1.9792	NA
886	70900	RAC1502	123186	2010	1758	3	10	30	W9A10YANA	1026	12	58	2	3	RFD	2.625	g/100g	30/10/10 Hurricane	LAST	W9A10YANA_RFD	13.5	-11	4.570754717	-2.811320755	YANA	2	2.625	NA	2.625	2.625	2.625	2	2.625	NA	2.625	2.625	2.625	2.625	5	2.625	2.625	2.625	2.625	NA	4	2.625	2.625	2.625	NA
887	70901	VW4326	119953	2010	620	4	1	1	W9A10COLE	1745	23	73	1	2	RFD	1.2915	g/100g	12/10/2010	LAST	W9A10COLE_RFD	34.5	-3.5	-4.429245283	-1.811320755	COLE	3	1.2915	1.2915	NA	1.2915	1.2915	4	1.2915	1.2915	1.2915	NA	1.2915	1.2915	3	1.2915	1.2915	NA	1.2915	1.2915	2	1.2915	NA	1.2915	1.2915
888	70902	WW20689	124192	2010	2113	4	1	2	W9A10YANA	2032	24	8	1	1	IRR	1.5055	g/100g	23/10/10 Lucerne	LAST	W9A10YANA_IRR	-36.5	1	-4.429245283	-1.811320755	YANA	1	NA	1.5055	1.5055	1.5055	1.5055	1	NA	1.5055	1.5055	1.5055	1.5055	1.5055	4	1.5055	1.5055	1.5055	NA	1.5055	1	NA	1.5055	1.5055	1.5055
889	70903	HRZ05_0145	120737	2010	873	4	1	3	W9A10COLE	2529	34	21	2	3	RFD	2.0349	g/100g	27/10/10 Lucerne	LAST	W9A10COLE_RFD	-17.5	7.5	-4.429245283	-1.811320755	COLE	2	2.0349	NA	2.0349	2.0349	2.0349	2	2.0349	NA	2.0349	2.0349	2.0349	2.0349	1	NA	2.0349	2.0349	2.0349	2.0349	1	NA	2.0349	2.0349	2.0349
890	70904	AUS33662	122973	2010	1678	4	1	4	W9A10YANA	813	10	21	1	1	IRR	2.017	g/100g	23/10/10 Lucerne	LAST	W9A10YANA_IRR	-23.5	-13	-4.429245283	-1.811320755	YANA	1	NA	2.017	2.017	2.017	2.017	1	NA	2.017	2.017	2.017	2.017	2.017	5	2.017	2.017	2.017	2.017	NA	2	2.017	NA	2.017	2.017
891	70905	DIAMONDBIRD	121389	2010	1108	4	1	5	W9A10COLE	3181	42	65	2	4	IRR	1.7052	g/100g	27/10/10 Lucerne	LAST	W9A10COLE_IRR	26.5	15.5	-4.429245283	-1.811320755	COLE	4	1.7052	1.7052	1.7052	NA	1.7052	1	NA	1.7052	1.7052	1.7052	1.7052	1.7052	2	1.7052	NA	1.7052	1.7052	1.7052	4	1.7052	1.7052	1.7052	NA
892	70906	WW20665	118418	2010	64	4	1	6	W9A10COLE	210	3	58	1	1	IRR	1.2536	g/100g	19/10/2010	LAST	W9A10COLE_IRR	19.5	-23.5	-4.429245283	-1.811320755	COLE	1	NA	1.2536	1.2536	1.2536	1.2536	5	1.2536	1.2536	1.2536	1.2536	NA	1.2536	3	1.2536	1.2536	NA	1.2536	1.2536	4	1.2536	1.2536	1.2536	NA
893	70907	HRZ04_0321	119372	2010	433	4	1	7	W9A10COLE	1164	16	24	1	2	RFD	2.7112	g/100g	19/10/2010	LAST	W9A10COLE_RFD	-14.5	-10.5	-4.429245283	-1.811320755	COLE	4	2.7112	2.7112	2.7112	NA	2.7112	2	2.7112	NA	2.7112	2.7112	2.7112	2.7112	3	2.7112	2.7112	NA	2.7112	2.7112	1	NA	2.7112	2.7112	2.7112
894	70908	RAC1393	119091	2010	299	4	1	8	W9A10COLE	883	12	47	1	1	IRR	1.4656	g/100g	12/10/2010	LAST	W9A10COLE_IRR	8.5	-14.5	-4.429245283	-1.811320755	COLE	3	1.4656	1.4656	NA	1.4656	1.4656	4	1.4656	1.4656	1.4656	NA	1.4656	1.4656	1	NA	1.4656	1.4656	1.4656	1.4656	5	1.4656	1.4656	1.4656	1.4656
895	70909	WW14072	125233	2010	2466	4	1	9	W9A10YANA	3073	35	81	2	4	IRR	1.2517	g/100g	30/10/10 Lucerne	LAST	W9A10YANA_IRR	36.5	12	-4.429245283	-1.811320755	YANA	5	1.2517	1.2517	1.2517	1.2517	NA	5	1.2517	1.2517	1.2517	1.2517	NA	1.2517	4	1.2517	1.2517	1.2517	NA	1.2517	5	1.2517	1.2517	1.2517	1.2517
896	70910	HRZ04_0425	125883	2010	2693	4	1	10	W9A10YANA	3723	43	27	1	2	RFD	2.4338	g/100g	23/10/10 Hurricane	LAST	W9A10YANA_RFD	-17.5	20	-4.429245283	-1.811320755	YANA	4	2.4338	2.4338	2.4338	NA	2.4338	2	2.4338	NA	2.4338	2.4338	2.4338	2.4338	2	2.4338	NA	2.4338	2.4338	2.4338	2	2.4338	NA	2.4338	2.4338
897	70911	WW21162	123664	2010	1921	4	1	11	W9A10YANA	1504	18	8	1	1	IRR	1.7572	g/100g	23/10/10 Lucerne	LAST	W9A10YANA_IRR	-36.5	-5	-4.429245283	-1.811320755	YANA	4	1.7572	1.7572	1.7572	NA	1.7572	1	NA	1.7572	1.7572	1.7572	1.7572	1.7572	3	1.7572	1.7572	NA	1.7572	1.7572	2	1.7572	NA	1.7572	1.7572
898	70912	BOLAC	120911	2010	934	4	1	12	W9A10COLE	2703	36	43	2	3	RFD	2.3817	g/100g	27/10/10 Lucerne	LAST	W9A10COLE_RFD	4.5	9.5	-4.429245283	-1.811320755	COLE	4	2.3817	2.3817	2.3817	NA	2.3817	5	2.3817	2.3817	2.3817	2.3817	NA	2.3817	2	2.3817	NA	2.3817	2.3817	2.3817	3	2.3817	2.3817	NA	2.3817
899	70913	VW0720	120420	2010	761	4	1	13	W9A10COLE	2212	30	8	2	3	RFD	2.0234	g/100g	27/10/10 Lucerne	LAST	W9A10COLE_RFD	-30.5	3.5	-4.429245283	-1.811320755	COLE	5	2.0234	2.0234	2.0234	2.0234	NA	4	2.0234	2.0234	2.0234	NA	2.0234	2.0234	3	2.0234	2.0234	NA	2.0234	2.0234	1	NA	2.0234	2.0234	2.0234
900	70914	RAC1393	125100	2010	2417	4	1	14	W9A10YANA	2940	34	36	1	2	RFD	2.2973	g/100g	23/10/10 Hurricane	LAST	W9A10YANA_RFD	-8.5	11	-4.429245283	-1.811320755	YANA	3	2.2973	2.2973	NA	2.2973	2.2973	4	2.2973	2.2973	2.2973	NA	2.2973	2.2973	1	NA	2.2973	2.2973	2.2973	2.2973	5	2.2973	2.2973	2.2973	2.2973
901	70915	HRZ06_0292	123114	2010	1731	4	1	15	W9A10YANA	954	11	74	2	4	IRR	1.9094	g/100g	30/10/10 Hurricane	LAST	W9A10YANA_IRR	29.5	-12	-4.429245283	-1.811320755	YANA	4	1.9094	1.9094	1.9094	NA	1.9094	2	1.9094	NA	1.9094	1.9094	1.9094	1.9094	1	NA	1.9094	1.9094	1.9094	1.9094	4	1.9094	1.9094	1.9094	NA
902	70916	HRZ06_0055	120174	2010	692	4	1	16	W9A10COLE	1966	26	66	1	2	RFD	1.5324	g/100g	19/10/2010	LAST	W9A10COLE_RFD	27.5	-0.5	-4.429245283	-1.811320755	COLE	2	1.5324	NA	1.5324	1.5324	1.5324	1	NA	1.5324	1.5324	1.5324	1.5324	1.5324	4	1.5324	1.5324	1.5324	NA	1.5324	4	1.5324	1.5324	1.5324	NA
903	70917	WW20068	123230	2010	1778	4	1	17	W9A10YANA	1070	13	14	1	1	IRR	1.9678	g/100g	23/10/10 Lucerne	LAST	W9A10YANA_IRR	-30.5	-10	-4.429245283	-1.811320755	YANA	3	1.9678	1.9678	NA	1.9678	1.9678	1	NA	1.9678	1.9678	1.9678	1.9678	1.9678	1	NA	1.9678	1.9678	1.9678	1.9678	2	1.9678	NA	1.9678	1.9678
904	70918	VW0644	123696	2010	1937	4	1	18	W9A10YANA	1536	18	40	1	2	RFD	2.1161	g/100g	23/10/10 Hurricane	LAST	W9A10YANA_RFD	-4.5	-5	-4.429245283	-1.811320755	YANA	5	2.1161	2.1161	2.1161	2.1161	NA	1	NA	2.1161	2.1161	2.1161	2.1161	2.1161	3	2.1161	2.1161	NA	2.1161	2.1161	4	2.1161	2.1161	2.1161	NA
905	70919	WW18946	124814	2010	2317	4	1	19	W9A10YANA	2654	31	14	1	1	IRR	1.6199	g/100g	23/10/10 Lucerne	LAST	W9A10YANA_IRR	-30.5	8	-4.429245283	-1.811320755	YANA	5	1.6199	1.6199	1.6199	1.6199	NA	3	1.6199	1.6199	NA	1.6199	1.6199	1.6199	5	1.6199	1.6199	1.6199	1.6199	NA	3	1.6199	1.6199	NA	1.6199
906	70920	SUNBRI	119192	2010	346	4	1	20	W9A10COLE	984	13	72	1	1	IRR	1.1152	g/100g	12/10/2010	LAST	W9A10COLE_IRR	33.5	-13.5	-4.429245283	-1.811320755	COLE	1	NA	1.1152	1.1152	1.1152	1.1152	5	1.1152	1.1152	1.1152	1.1152	NA	1.1152	1	NA	1.1152	1.1152	1.1152	1.1152	1	NA	1.1152	1.1152	1.1152
907	70921	WW20667	119409	2010	442	4	1	21	W9A10COLE	1201	16	61	1	2	RFD	2.2668	g/100g	12/10/2010	LAST	W9A10COLE_RFD	22.5	-10.5	-4.429245283	-1.811320755	COLE	2	2.2668	NA	2.2668	2.2668	2.2668	2	2.2668	NA	2.2668	2.2668	2.2668	2.2668	4	2.2668	2.2668	2.2668	NA	2.2668	5	2.2668	2.2668	2.2668	2.2668
908	70922	118849_303	125536	2010	2571	4	1	22	W9A10YANA	3376	39	32	1	2	RFD	2.4475	g/100g	23/10/10 Hurricane	LAST	W9A10YANA_RFD	-12.5	16	-4.429245283	-1.811320755	YANA	5	2.4475	2.4475	2.4475	2.4475	NA	1	NA	2.4475	2.4475	2.4475	2.4475	2.4475	5	2.4475	2.4475	2.4475	2.4475	NA	5	2.4475	2.4475	2.4475	2.4475
909	70923	WW19987	119664	2010	522	4	1	23	W9A10COLE	1456	20	12	1	2	RFD	2.5529	g/100g	19/10/2010	LAST	W9A10COLE_RFD	-26.5	-6.5	-4.429245283	-1.811320755	COLE	1	NA	2.5529	2.5529	2.5529	2.5529	1	NA	2.5529	2.5529	2.5529	2.5529	2.5529	5	2.5529	2.5529	2.5529	2.5529	NA	1	NA	2.5529	2.5529	2.5529
910	70924	WW19525	124861	2010	2336	4	1	24	W9A10YANA	2701	31	61	2	3	RFD	1.7253	g/100g	30/10/10 Hurricane	LAST	W9A10YANA_RFD	16.5	8	-4.429245283	-1.811320755	YANA	1	NA	1.7253	1.7253	1.7253	1.7253	4	1.7253	1.7253	1.7253	NA	1.7253	1.7253	2	1.7253	NA	1.7253	1.7253	1.7253	5	1.7253	1.7253	1.7253	1.7253
911	70925	VW2067	124567	2010	2237	4	1	25	W9A10YANA	2407	28	31	1	2	RFD	1.9705	g/100g	23/10/10 Hurricane	LAST	W9A10YANA_RFD	-13.5	5	-4.429245283	-1.811320755	YANA	5	1.9705	1.9705	1.9705	1.9705	NA	1	NA	1.9705	1.9705	1.9705	1.9705	1.9705	1	NA	1.9705	1.9705	1.9705	1.9705	4	1.9705	1.9705	1.9705	NA
912	70926	WW18946	120608	2010	823	4	1	26	W9A10COLE	2400	32	44	2	3	RFD	1.8383	g/100g	27/10/10 Lucerne	LAST	W9A10COLE_RFD	5.5	5.5	-4.429245283	-1.811320755	COLE	5	1.8383	1.8383	1.8383	1.8383	NA	3	1.8383	1.8383	NA	1.8383	1.8383	1.8383	5	1.8383	1.8383	1.8383	1.8383	NA	3	1.8383	1.8383	NA	1.8383
913	70927	HRZ06_0143	118212	2010	3	4	1	27	W9A10COLE	4	1	4	1	1	IRR	0.71135	g/100g	12/10/2010	LAST	W9A10COLE_IRR	-34.5	-25.5	-4.429245283	-1.811320755	COLE	2	0.71135	NA	0.71135	0.71135	0.71135	5	0.71135	0.71135	0.71135	0.71135	NA	0.71135	3	0.71135	0.71135	NA	0.71135	0.71135	2	0.71135	NA	0.71135	0.71135
914	70928	VW2373	122063	2010	1352	4	1	28	W9A10COLE	3855	51	55	2	4	IRR	1.4024	g/100g	27/10/10 Hurricane	LAST	W9A10COLE_IRR	16.5	24.5	-4.429245283	-1.811320755	COLE	3	1.4024	1.4024	NA	1.4024	1.4024	5	1.4024	1.4024	1.4024	1.4024	NA	1.4024	5	1.4024	1.4024	1.4024	1.4024	NA	5	1.4024	1.4024	1.4024	1.4024
915	70929	WW20383	121917	2010	1299	4	1	29	W9A10COLE	3709	49	61	2	4	IRR	2.1487	g/100g	27/10/10 Lucerne	LAST	W9A10COLE_IRR	22.5	22.5	-4.429245283	-1.811320755	COLE	4	2.1487	2.1487	2.1487	NA	2.1487	1	NA	2.1487	2.1487	2.1487	2.1487	2.1487	5	2.1487	2.1487	2.1487	2.1487	NA	1	NA	2.1487	2.1487	2.1487
916	70930	118849_303	119526	2010	480	4	1	30	W9A10COLE	1318	18	26	1	2	RFD	1.8898	g/100g	19/10/2010	LAST	W9A10COLE_RFD	-12.5	-8.5	-4.429245283	-1.811320755	COLE	5	1.8898	1.8898	1.8898	1.8898	NA	1	NA	1.8898	1.8898	1.8898	1.8898	1.8898	5	1.8898	1.8898	1.8898	1.8898	NA	5	1.8898	1.8898	1.8898	1.8898
917	70931	AUS33585	121055	2010	1010	4	2	1	W9A10COLE	2847	38	35	2	3	RFD	1.6252	g/100g	27/10/10 Lucerne	LAST	W9A10COLE_RFD	-3.5	11.5	-3.429245283	-1.811320755	COLE	3	1.6252	1.6252	NA	1.6252	1.6252	3	1.6252	1.6252	NA	1.6252	1.6252	1.6252	2	1.6252	NA	1.6252	1.6252	1.6252	1	NA	1.6252	1.6252	1.6252
918	70932	HRZ06_0033	125698	2010	2628	4	2	2	W9A10YANA	3538	41	18	1	1	IRR	1.3846	g/100g	23/10/10 Lucerne	LAST	W9A10YANA_IRR	-26.5	18	-3.429245283	-1.811320755	YANA	2	1.3846	NA	1.3846	1.3846	1.3846	3	1.3846	1.3846	NA	1.3846	1.3846	1.3846	5	1.3846	1.3846	1.3846	1.3846	NA	4	1.3846	1.3846	1.3846	NA
919	70933	WW19932	123974	2010	2031	4	2	3	W9A10YANA	1814	21	54	2	3	RFD	1.8155	g/100g	30/10/10 Lucerne	LAST	W9A10YANA_RFD	9.5	-2	-3.429245283	-1.811320755	YANA	3	1.8155	1.8155	NA	1.8155	1.8155	5	1.8155	1.8155	1.8155	1.8155	NA	1.8155	4	1.8155	1.8155	1.8155	NA	1.8155	5	1.8155	1.8155	1.8155	1.8155
920	70934	HRZ06_0514	119591	2010	500	4	2	4	W9A10COLE	1383	19	15	1	2	RFD	2.4518	g/100g	12/10/2010	LAST	W9A10COLE_RFD	-23.5	-7.5	-3.429245283	-1.811320755	COLE	3	2.4518	2.4518	NA	2.4518	2.4518	5	2.4518	2.4518	2.4518	2.4518	NA	2.4518	4	2.4518	2.4518	2.4518	NA	2.4518	4	2.4518	2.4518	2.4518	NA
921	70935	WW19662	123118	2010	1732	4	2	5	W9A10YANA	958	11	78	2	4	IRR	2.0852	g/100g	30/10/10 Hurricane	LAST	W9A10YANA_IRR	33.5	-12	-3.429245283	-1.811320755	YANA	4	2.0852	2.0852	2.0852	NA	2.0852	5	2.0852	2.0852	2.0852	2.0852	NA	2.0852	5	2.0852	2.0852	2.0852	2.0852	NA	1	NA	2.0852	2.0852	2.0852
922	70936	WW19492	121681	2010	1213	4	2	6	W9A10COLE	3473	46	53	2	4	IRR	2.3095	g/100g	27/10/10 Lucerne	LAST	W9A10COLE_IRR	14.5	19.5	-3.429245283	-1.811320755	COLE	2	2.3095	NA	2.3095	2.3095	2.3095	1	NA	2.3095	2.3095	2.3095	2.3095	2.3095	5	2.3095	2.3095	2.3095	2.3095	NA	3	2.3095	2.3095	NA	2.3095
923	70937	VW2373	118622	2010	136	4	2	7	W9A10COLE	414	6	34	1	1	IRR	1.145	g/100g	19/10/2010	LAST	W9A10COLE_IRR	-4.5	-20.5	-3.429245283	-1.811320755	COLE	3	1.145	1.145	NA	1.145	1.145	5	1.145	1.145	1.145	1.145	NA	1.145	5	1.145	1.145	1.145	1.145	NA	5	1.145	1.145	1.145	1.145
924	70938	HRZ05_0137	120716	2010	865	4	2	8	W9A10COLE	2508	33	76	2	3	RFD	1.8783	g/100g	27/10/10 Lucerne	LAST	W9A10COLE_RFD	37.5	6.5	-3.429245283	-1.811320755	COLE	1	NA	1.8783	1.8783	1.8783	1.8783	5	1.8783	1.8783	1.8783	1.8783	NA	1.8783	3	1.8783	1.8783	NA	1.8783	1.8783	2	1.8783	NA	1.8783	1.8783
925	70939	SUN559A	119320	2010	412	4	2	9	W9A10COLE	1112	15	48	1	2	RFD	1.5226	g/100g	19/10/2010	LAST	W9A10COLE_RFD	9.5	-11.5	-3.429245283	-1.811320755	COLE	4	1.5226	1.5226	1.5226	NA	1.5226	1	NA	1.5226	1.5226	1.5226	1.5226	1.5226	4	1.5226	1.5226	1.5226	NA	1.5226	5	1.5226	1.5226	1.5226	1.5226
926	70940	WW18769	124312	2010	2153	4	2	10	W9A10YANA	2152	25	40	1	2	RFD	2.0985	g/100g	23/10/10 Hurricane	LAST	W9A10YANA_RFD	-4.5	2	-3.429245283	-1.811320755	YANA	4	2.0985	2.0985	2.0985	NA	2.0985	1	NA	2.0985	2.0985	2.0985	2.0985	2.0985	3	2.0985	2.0985	NA	2.0985	2.0985	1	NA	2.0985	2.0985	2.0985
927	70941	EGA_STAMPEDE	119227	2010	364	4	2	11	W9A10COLE	1019	14	31	1	2	RFD	2.3136	g/100g	19/10/2010	LAST	W9A10COLE_RFD	-7.5	-12.5	-3.429245283	-1.811320755	COLE	2	2.3136	NA	2.3136	2.3136	2.3136	1	NA	2.3136	2.3136	2.3136	2.3136	2.3136	2	2.3136	NA	2.3136	2.3136	2.3136	5	2.3136	2.3136	2.3136	2.3136
928	70942	WAGT022	122691	2010	1576	4	2	12	W9A10YANA	531	7	3	1	1	IRR	1.9641	g/100g	23/10/10 Lucerne	LAST	W9A10YANA_IRR	-41.5	-16	-3.429245283	-1.811320755	YANA	3	1.9641	1.9641	NA	1.9641	1.9641	4	1.9641	1.9641	1.9641	NA	1.9641	1.9641	5	1.9641	1.9641	1.9641	1.9641	NA	4	1.9641	1.9641	1.9641	NA
929	70943	VENTURA	123610	2010	1907	4	2	13	W9A10YANA	1450	17	42	1	2	RFD	2.5197	g/100g	23/10/10 Hurricane	LAST	W9A10YANA_RFD	-2.5	-6	-3.429245283	-1.811320755	YANA	1	NA	2.5197	2.5197	2.5197	2.5197	5	2.5197	2.5197	2.5197	2.5197	NA	2.5197	4	2.5197	2.5197	2.5197	NA	2.5197	4	2.5197	2.5197	2.5197	NA
930	70944	WW19753	124071	2010	2071	4	2	14	W9A10YANA	1911	22	63	2	3	RFD	2.1925	g/100g	30/10/10 Hurricane	LAST	W9A10YANA_RFD	18.5	-1	-3.429245283	-1.811320755	YANA	4	2.1925	2.1925	2.1925	NA	2.1925	5	2.1925	2.1925	2.1925	2.1925	NA	2.1925	1	NA	2.1925	2.1925	2.1925	2.1925	1	NA	2.1925	2.1925	2.1925
931	70945	VW3457	123375	2010	1822	4	2	15	W9A10YANA	1215	14	71	2	4	IRR	1.7864	g/100g	30/10/10 Lucerne	LAST	W9A10YANA_IRR	26.5	-9	-3.429245283	-1.811320755	YANA	3	1.7864	1.7864	NA	1.7864	1.7864	1	NA	1.7864	1.7864	1.7864	1.7864	1.7864	4	1.7864	1.7864	1.7864	NA	1.7864	4	1.7864	1.7864	1.7864	NA
932	70946	QT13365	122053	2010	1348	4	2	16	W9A10COLE	3845	51	45	2	4	IRR	1.4549	g/100g	27/10/10 Lucerne	LAST	W9A10COLE_IRR	6.5	24.5	-3.429245283	-1.811320755	COLE	2	1.4549	NA	1.4549	1.4549	1.4549	1	NA	1.4549	1.4549	1.4549	1.4549	1.4549	2	1.4549	NA	1.4549	1.4549	1.4549	5	1.4549	1.4549	1.4549	1.4549
933	70947	WAGT033	120628	2010	829	4	2	17	W9A10COLE	2420	32	64	2	3	RFD	3.1937	g/100g	27/10/10 Lucerne	LAST	W9A10COLE_RFD	25.5	5.5	-3.429245283	-1.811320755	COLE	2	3.1937	NA	3.1937	3.1937	3.1937	2	3.1937	NA	3.1937	3.1937	3.1937	3.1937	4	3.1937	3.1937	3.1937	NA	3.1937	2	3.1937	NA	3.1937	3.1937
934	70948	VW4355	124006	2010	2043	4	2	18	W9A10YANA	1846	21	86	2	4	IRR	1.2671	g/100g	30/10/10 Lucerne	LAST	W9A10YANA_IRR	41.5	-2	-3.429245283	-1.811320755	YANA	4	1.2671	1.2671	1.2671	NA	1.2671	4	1.2671	1.2671	1.2671	NA	1.2671	1.2671	5	1.2671	1.2671	1.2671	1.2671	NA	1	NA	1.2671	1.2671	1.2671
935	70949	VW0990	122329	2010	1451	4	2	19	W9A10YANA	169	2	81	2	4	IRR	2.0975	g/100g	30/10/10 Hurricane	LAST	W9A10YANA_IRR	36.5	-21	-3.429245283	-1.811320755	YANA	3	2.0975	2.0975	NA	2.0975	2.0975	4	2.0975	2.0975	2.0975	NA	2.0975	2.0975	2	2.0975	NA	2.0975	2.0975	2.0975	2	2.0975	NA	2.0975	2.0975
936	70950	WW19565	120634	2010	832	4	2	20	W9A10COLE	2426	32	70	2	3	RFD	2.0702	g/100g	27/10/10 Lucerne	LAST	W9A10COLE_RFD	31.5	5.5	-3.429245283	-1.811320755	COLE	2	2.0702	NA	2.0702	2.0702	2.0702	5	2.0702	2.0702	2.0702	2.0702	NA	2.0702	5	2.0702	2.0702	2.0702	2.0702	NA	5	2.0702	2.0702	2.0702	2.0702
937	70951	HRZ06_0270	119471	2010	466	4	2	21	W9A10COLE	1263	17	47	1	2	RFD	1.3959	g/100g	19/10/2010	LAST	W9A10COLE_RFD	8.5	-9.5	-3.429245283	-1.811320755	COLE	2	1.3959	NA	1.3959	1.3959	1.3959	2	1.3959	NA	1.3959	1.3959	1.3959	1.3959	4	1.3959	1.3959	1.3959	NA	1.3959	5	1.3959	1.3959	1.3959	1.3959
938	70952	HRZ04_0191	122940	2010	1666	4	2	22	W9A10YANA	780	9	76	2	4	IRR	1.393	g/100g	30/10/10 Hurricane	LAST	W9A10YANA_IRR	31.5	-14	-3.429245283	-1.811320755	YANA	5	1.393	1.393	1.393	1.393	NA	4	1.393	1.393	1.393	NA	1.393	1.393	1	NA	1.393	1.393	1.393	1.393	3	1.393	1.393	NA	1.393
939	70953	WW20527	122113	2010	1371	4	2	23	W9A10COLE	3905	52	29	2	4	IRR	0.94742	g/100g	27/10/10 Lucerne	LAST	W9A10COLE_IRR	-9.5	25.5	-3.429245283	-1.811320755	COLE	5	0.94742	0.94742	0.94742	0.94742	NA	4	0.94742	0.94742	0.94742	NA	0.94742	0.94742	5	0.94742	0.94742	0.94742	0.94742	NA	1	NA	0.94742	0.94742	0.94742
940	70954	BOLAC	125001	2010	2386	4	2	24	W9A10YANA	2841	33	25	1	2	RFD	1.4605	g/100g	23/10/10 Hurricane	LAST	W9A10YANA_RFD	-19.5	10	-3.429245283	-1.811320755	YANA	4	1.4605	1.4605	1.4605	NA	1.4605	5	1.4605	1.4605	1.4605	1.4605	NA	1.4605	2	1.4605	NA	1.4605	1.4605	1.4605	3	1.4605	1.4605	NA	1.4605
941	70955	VW1864	118600	2010	130	4	2	25	W9A10COLE	392	6	12	1	1	IRR	1.8548	g/100g	12/10/2010	LAST	W9A10COLE_IRR	-26.5	-20.5	-3.429245283	-1.811320755	COLE	5	1.8548	1.8548	1.8548	1.8548	NA	1	NA	1.8548	1.8548	1.8548	1.8548	1.8548	4	1.8548	1.8548	1.8548	NA	1.8548	4	1.8548	1.8548	1.8548	NA
942	70956	WW19514	122481	2010	1503	4	2	26	W9A10YANA	321	4	57	2	3	RFD	2.0839	g/100g	30/10/10 Lucerne	LAST	W9A10YANA_RFD	12.5	-19	-3.429245283	-1.811320755	YANA	2	2.0839	NA	2.0839	2.0839	2.0839	2	2.0839	NA	2.0839	2.0839	2.0839	2.0839	4	2.0839	2.0839	2.0839	NA	2.0839	4	2.0839	2.0839	2.0839	NA
943	70957	WW20159	121324	2010	1081	4	2	27	W9A10COLE	3116	41	76	2	4	IRR	1.0235	g/100g	27/10/10 Lucerne	LAST	W9A10COLE_IRR	37.5	14.5	-3.429245283	-1.811320755	COLE	4	1.0235	1.0235	1.0235	NA	1.0235	1	NA	1.0235	1.0235	1.0235	1.0235	1.0235	1	NA	1.0235	1.0235	1.0235	1.0235	3	1.0235	1.0235	NA	1.0235
944	70958	WW19562	119198	2010	349	4	2	28	W9A10COLE	990	14	2	1	2	RFD	1.7159	g/100g	19/10/2010	LAST	W9A10COLE_RFD	-36.5	-12.5	-3.429245283	-1.811320755	COLE	5	1.7159	1.7159	1.7159	1.7159	NA	5	1.7159	1.7159	1.7159	1.7159	NA	1.7159	2	1.7159	NA	1.7159	1.7159	1.7159	1	NA	1.7159	1.7159	1.7159
945	70959	HRZ06_2087	119499	2010	473	4	2	29	W9A10COLE	1291	17	75	1	2	RFD	1.6119	g/100g	12/10/2010	LAST	W9A10COLE_RFD	36.5	-9.5	-3.429245283	-1.811320755	COLE	2	1.6119	NA	1.6119	1.6119	1.6119	3	1.6119	1.6119	NA	1.6119	1.6119	1.6119	2	1.6119	NA	1.6119	1.6119	1.6119	5	1.6119	1.6119	1.6119	1.6119
946	70960	HRZ06_0250	123966	2010	2028	4	2	30	W9A10YANA	1806	21	46	2	3	RFD	2.0971	g/100g	30/10/10 Lucerne	LAST	W9A10YANA_RFD	1.5	-2	-3.429245283	-1.811320755	YANA	1	NA	2.0971	2.0971	2.0971	2.0971	3	2.0971	2.0971	NA	2.0971	2.0971	2.0971	4	2.0971	2.0971	2.0971	NA	2.0971	5	2.0971	2.0971	2.0971	2.0971
947	70961	RAC1502	124036	2010	2055	4	3	1	W9A10YANA	1876	22	28	1	2	RFD	3.0444	g/100g	23/10/10 Hurricane	LAST	W9A10YANA_RFD	-16.5	-1	-2.429245283	-1.811320755	YANA	2	3.0444	NA	3.0444	3.0444	3.0444	2	3.0444	NA	3.0444	3.0444	3.0444	3.0444	5	3.0444	3.0444	3.0444	3.0444	NA	4	3.0444	3.0444	3.0444	NA
948	70962	WEEBILL1	124790	2010	2305	4	3	2	W9A10YANA	2630	30	78	2	4	IRR	1.8911	g/100g	30/10/10 Hurricane	LAST	W9A10YANA_IRR	33.5	7	-2.429245283	-1.811320755	YANA	2	1.8911	NA	1.8911	1.8911	1.8911	3	1.8911	1.8911	NA	1.8911	1.8911	1.8911	2	1.8911	NA	1.8911	1.8911	1.8911	5	1.8911	1.8911	1.8911	1.8911
949	70963	VW0760	125760	2010	2646	4	3	3	W9A10YANA	3600	41	80	2	4	IRR	1.4748	g/100g	30/10/10 Lucerne	LAST	W9A10YANA_IRR	35.5	18	-2.429245283	-1.811320755	YANA	4	1.4748	1.4748	1.4748	NA	1.4748	2	1.4748	NA	1.4748	1.4748	1.4748	1.4748	1	NA	1.4748	1.4748	1.4748	1.4748	3	1.4748	1.4748	NA	1.4748
950	70964	WW19891	121011	2010	991	4	3	4	W9A10COLE	2803	37	67	2	3	RFD	2.2297	g/100g	27/10/10 Lucerne	LAST	W9A10COLE_RFD	28.5	10.5	-2.429245283	-1.811320755	COLE	1	NA	2.2297	2.2297	2.2297	2.2297	4	2.2297	2.2297	2.2297	NA	2.2297	2.2297	1	NA	2.2297	2.2297	2.2297	2.2297	3	2.2297	2.2297	NA	2.2297
951	70965	B1272C4	125256	2010	2474	4	3	5	W9A10YANA	3096	36	16	1	1	IRR	2.1392	g/100g	23/10/10 Lucerne	LAST	W9A10YANA_IRR	-28.5	13	-2.429245283	-1.811320755	YANA	1	NA	2.1392	2.1392	2.1392	2.1392	1	NA	2.1392	2.1392	2.1392	2.1392	2.1392	2	2.1392	NA	2.1392	2.1392	2.1392	3	2.1392	2.1392	NA	2.1392
952	70966	WW21687	119034	2010	268	4	3	6	W9A10COLE	826	11	66	1	1	IRR	1.2946	g/100g	19/10/2010	LAST	W9A10COLE_IRR	27.5	-15.5	-2.429245283	-1.811320755	COLE	3	1.2946	1.2946	NA	1.2946	1.2946	3	1.2946	1.2946	NA	1.2946	1.2946	1.2946	2	1.2946	NA	1.2946	1.2946	1.2946	5	1.2946	1.2946	1.2946	1.2946
953	70967	B1272C4	120572	2010	810	4	3	7	W9A10COLE	2364	32	8	2	3	RFD	1.9761	g/100g	27/10/10 Lucerne	LAST	W9A10COLE_RFD	-30.5	5.5	-2.429245283	-1.811320755	COLE	1	NA	1.9761	1.9761	1.9761	1.9761	1	NA	1.9761	1.9761	1.9761	1.9761	1.9761	2	1.9761	NA	1.9761	1.9761	1.9761	3	1.9761	1.9761	NA	1.9761
954	70968	B1227E	118306	2010	28	4	3	8	W9A10COLE	98	2	22	1	1	IRR	0.91365	g/100g	19/10/2010	LAST	W9A10COLE_IRR	-16.5	-24.5	-2.429245283	-1.811320755	COLE	3	0.91365	0.91365	NA	0.91365	0.91365	5	0.91365	0.91365	0.91365	0.91365	NA	0.91365	4	0.91365	0.91365	0.91365	NA	0.91365	2	0.91365	NA	0.91365	0.91365
955	70969	WW20214	120009	2010	637	4	3	9	W9A10COLE	1801	24	53	1	2	RFD	1.9752	g/100g	19/10/2010	LAST	W9A10COLE_RFD	14.5	-2.5	-2.429245283	-1.811320755	COLE	2	1.9752	NA	1.9752	1.9752	1.9752	2	1.9752	NA	1.9752	1.9752	1.9752	1.9752	3	1.9752	1.9752	NA	1.9752	1.9752	4	1.9752	1.9752	1.9752	NA
956	70970	RAC1418	119827	2010	576	4	3	10	W9A10COLE	1619	22	23	1	2	RFD	2.6059	g/100g	19/10/2010	LAST	W9A10COLE_RFD	-15.5	-4.5	-2.429245283	-1.811320755	COLE	3	2.6059	2.6059	NA	2.6059	2.6059	2	2.6059	NA	2.6059	2.6059	2.6059	2.6059	5	2.6059	2.6059	2.6059	2.6059	NA	4	2.6059	2.6059	2.6059	NA
957	70971	AUS33585	118326	2010	31	4	3	11	W9A10COLE	118	2	42	1	1	IRR	1.8983	g/100g	19/10/2010	LAST	W9A10COLE_IRR	3.5	-24.5	-2.429245283	-1.811320755	COLE	3	1.8983	1.8983	NA	1.8983	1.8983	3	1.8983	1.8983	NA	1.8983	1.8983	1.8983	2	1.8983	NA	1.8983	1.8983	1.8983	1	NA	1.8983	1.8983	1.8983
958	70972	QT13359	122416	2010	1483	4	3	12	W9A10YANA	256	3	80	2	4	IRR	1.4814	g/100g	30/10/10 Hurricane	LAST	W9A10YANA_IRR	35.5	-20	-2.429245283	-1.811320755	YANA	1	NA	1.4814	1.4814	1.4814	1.4814	3	1.4814	1.4814	NA	1.4814	1.4814	1.4814	5	1.4814	1.4814	1.4814	1.4814	NA	3	1.4814	1.4814	NA	1.4814
959	70973	VW0760	125204	2010	2453	4	3	13	W9A10YANA	3044	35	52	2	3	RFD	1.9834	g/100g	30/10/10 Lucerne	LAST	W9A10YANA_RFD	7.5	12	-2.429245283	-1.811320755	YANA	4	1.9834	1.9834	1.9834	NA	1.9834	2	1.9834	NA	1.9834	1.9834	1.9834	1.9834	1	NA	1.9834	1.9834	1.9834	1.9834	3	1.9834	1.9834	NA	1.9834
960	70974	VW0385	124184	2010	2108	4	3	14	W9A10YANA	2024	23	88	2	4	IRR	1.4471	g/100g	30/10/10 Hurricane	LAST	W9A10YANA_IRR	43.5	0	-2.429245283	-1.811320755	YANA	4	1.4471	1.4471	1.4471	NA	1.4471	4	1.4471	1.4471	1.4471	NA	1.4471	1.4471	5	1.4471	1.4471	1.4471	1.4471	NA	4	1.4471	1.4471	1.4471	NA
961	70975	WW19716	119790	2010	567	4	3	15	W9A10COLE	1582	21	62	1	2	RFD	2.2898	g/100g	19/10/2010	LAST	W9A10COLE_RFD	23.5	-5.5	-2.429245283	-1.811320755	COLE	5	2.2898	2.2898	2.2898	2.2898	NA	5	2.2898	2.2898	2.2898	2.2898	NA	2.2898	4	2.2898	2.2898	2.2898	NA	2.2898	2	2.2898	NA	2.2898	2.2898
962	70976	HRZ06_0299	123205	2010	1766	4	3	16	W9A10YANA	1045	12	77	2	4	IRR	1.2079	g/100g	30/10/10 Hurricane	LAST	W9A10YANA_IRR	32.5	-11	-2.429245283	-1.811320755	YANA	2	1.2079	NA	1.2079	1.2079	1.2079	5	1.2079	1.2079	1.2079	1.2079	NA	1.2079	5	1.2079	1.2079	1.2079	1.2079	NA	5	1.2079	1.2079	1.2079	1.2079
963	70977	HRZ05_0224	119908	2010	600	4	3	17	W9A10COLE	1700	23	28	1	2	RFD	1.4264	g/100g	19/10/2010	LAST	W9A10COLE_RFD	-10.5	-3.5	-2.429245283	-1.811320755	COLE	5	1.4264	1.4264	1.4264	1.4264	NA	2	1.4264	NA	1.4264	1.4264	1.4264	1.4264	3	1.4264	1.4264	NA	1.4264	1.4264	4	1.4264	1.4264	1.4264	NA
964	70978	HRZ05_0101	121096	2010	1022	4	3	18	W9A10COLE	2888	38	76	2	3	RFD	2.1317	g/100g	27/10/10 Lucerne	LAST	W9A10COLE_RFD	37.5	11.5	-2.429245283	-1.811320755	COLE	3	2.1317	2.1317	NA	2.1317	2.1317	5	2.1317	2.1317	2.1317	2.1317	NA	2.1317	3	2.1317	2.1317	NA	2.1317	2.1317	2	2.1317	NA	2.1317	2.1317
965	70979	HRZ04_0111	126019	2010	2748	4	3	19	W9A10YANA	3859	44	75	2	4	IRR	1.8479	g/100g	30/10/10 Hurricane	LAST	W9A10YANA_IRR	30.5	21	-2.429245283	-1.811320755	YANA	4	1.8479	1.8479	1.8479	NA	1.8479	4	1.8479	1.8479	1.8479	NA	1.8479	1.8479	5	1.8479	1.8479	1.8479	1.8479	NA	2	1.8479	NA	1.8479	1.8479
966	70980	VT2474	119143	2010	324	4	3	20	W9A10COLE	935	13	23	1	1	IRR	1.7584	g/100g	19/10/2010	LAST	W9A10COLE_IRR	-15.5	-13.5	-2.429245283	-1.811320755	COLE	5	1.7584	1.7584	1.7584	1.7584	NA	5	1.7584	1.7584	1.7584	1.7584	NA	1.7584	3	1.7584	1.7584	NA	1.7584	1.7584	5	1.7584	1.7584	1.7584	1.7584
967	70981	HRZ04_0157	125177	2010	2445	4	3	21	W9A10YANA	3017	35	25	1	2	RFD	2.6961	g/100g	23/10/10 Hurricane	LAST	W9A10YANA_RFD	-19.5	12	-2.429245283	-1.811320755	YANA	2	2.6961	NA	2.6961	2.6961	2.6961	5	2.6961	2.6961	2.6961	2.6961	NA	2.6961	2	2.6961	NA	2.6961	2.6961	2.6961	3	2.6961	2.6961	NA	2.6961
968	70982	HRZ05_0145	123130	2010	1737	4	3	22	W9A10YANA	970	12	2	1	1	IRR	2.1981	g/100g	23/10/10 Lucerne	LAST	W9A10YANA_IRR	-42.5	-11	-2.429245283	-1.811320755	YANA	2	2.1981	NA	2.1981	2.1981	2.1981	2	2.1981	NA	2.1981	2.1981	2.1981	2.1981	1	NA	2.1981	2.1981	2.1981	2.1981	1	NA	2.1981	2.1981	2.1981
969	70983	VW0857	118892	2010	219	4	3	23	W9A10COLE	684	9	76	1	1	IRR	1.0271	g/100g	19/10/2010	LAST	W9A10COLE_IRR	37.5	-17.5	-2.429245283	-1.811320755	COLE	5	1.0271	1.0271	1.0271	1.0271	NA	2	1.0271	NA	1.0271	1.0271	1.0271	1.0271	4	1.0271	1.0271	1.0271	NA	1.0271	4	1.0271	1.0271	1.0271	NA
970	70984	LPB04_2264	123058	2010	1713	4	3	24	W9A10YANA	898	11	18	1	1	IRR	2.4345	g/100g	23/10/10 Lucerne	LAST	W9A10YANA_IRR	-26.5	-12	-2.429245283	-1.811320755	YANA	3	2.4345	2.4345	NA	2.4345	2.4345	4	2.4345	2.4345	2.4345	NA	2.4345	2.4345	1	NA	2.4345	2.4345	2.4345	2.4345	1	NA	2.4345	2.4345	2.4345
971	70985	HRZ04_0511	120524	2010	792	4	3	25	W9A10COLE	2316	31	36	2	3	RFD	1.8655	g/100g	27/10/10 Lucerne	LAST	W9A10COLE_RFD	-2.5	4.5	-2.429245283	-1.811320755	COLE	3	1.8655	1.8655	NA	1.8655	1.8655	1	NA	1.8655	1.8655	1.8655	1.8655	1.8655	1	NA	1.8655	1.8655	1.8655	1.8655	5	1.8655	1.8655	1.8655	1.8655
972	70986	WW19891	125916	2010	2702	4	3	26	W9A10YANA	3756	43	60	2	3	RFD	2.157	g/100g	30/10/10 Lucerne	LAST	W9A10YANA_RFD	15.5	20	-2.429245283	-1.811320755	YANA	1	NA	2.157	2.157	2.157	2.157	4	2.157	2.157	2.157	NA	2.157	2.157	1	NA	2.157	2.157	2.157	2.157	3	2.157	2.157	NA	2.157
973	70987	HRZ04_0515	123596	2010	1901	4	3	27	W9A10YANA	1436	17	28	1	2	RFD	2.129	g/100g	23/10/10 Hurricane	LAST	W9A10YANA_RFD	-16.5	-6	-2.429245283	-1.811320755	YANA	5	2.129	2.129	2.129	2.129	NA	3	2.129	2.129	NA	2.129	2.129	2.129	5	2.129	2.129	2.129	2.129	NA	5	2.129	2.129	2.129	2.129
974	70988	WW21859	120896	2010	926	4	3	28	W9A10COLE	2688	36	28	2	3	RFD	1.9342	g/100g	27/10/10 Lucerne	LAST	W9A10COLE_RFD	-10.5	9.5	-2.429245283	-1.811320755	COLE	5	1.9342	1.9342	1.9342	1.9342	NA	5	1.9342	1.9342	1.9342	1.9342	NA	1.9342	4	1.9342	1.9342	1.9342	NA	1.9342	5	1.9342	1.9342	1.9342	1.9342
975	70989	VW1929	119897	2010	593	4	3	29	W9A10COLE	1689	23	17	1	2	RFD	1.8445	g/100g	12/10/2010	LAST	W9A10COLE_RFD	-21.5	-3.5	-2.429245283	-1.811320755	COLE	5	1.8445	1.8445	1.8445	1.8445	NA	3	1.8445	1.8445	NA	1.8445	1.8445	1.8445	2	1.8445	NA	1.8445	1.8445	1.8445	2	1.8445	NA	1.8445	1.8445
976	70990	HRZ03_0076	118367	2010	47	4	3	30	W9A10COLE	159	3	7	1	1	IRR	1.1726	g/100g	23/10/10 Lucerne	LAST	W9A10COLE_IRR	-31.5	-23.5	-2.429245283	-1.811320755	COLE	5	1.1726	1.1726	1.1726	1.1726	NA	1	NA	1.1726	1.1726	1.1726	1.1726	1.1726	3	1.1726	1.1726	NA	1.1726	1.1726	2	1.1726	NA	1.1726	1.1726
977	70991	WW19665	120704	2010	863	4	4	1	W9A10COLE	2496	33	64	2	3	RFD	2.2182	g/100g	27/10/10 Lucerne	LAST	W9A10COLE_RFD	25.5	6.5	-1.429245283	-1.811320755	COLE	5	2.2182	2.2182	2.2182	2.2182	NA	1	NA	2.2182	2.2182	2.2182	2.2182	2.2182	3	2.2182	2.2182	NA	2.2182	2.2182	2	2.2182	NA	2.2182	2.2182
978	70993	VV2856	125876	2010	2690	4	4	3	W9A10YANA	3716	43	20	1	1	IRR	2.1124	g/100g	23/10/10 Lucerne	LAST	W9A10YANA_IRR	-24.5	20	-1.429245283	-1.811320755	YANA	3	2.1124	2.1124	NA	2.1124	2.1124	5	2.1124	2.1124	2.1124	2.1124	NA	2.1124	1	NA	2.1124	2.1124	2.1124	2.1124	2	2.1124	NA	2.1124	2.1124
979	70994	HRZ04_0321	118729	2010	163	4	4	4	W9A10COLE	521	7	65	1	1	IRR	1.5899	g/100g	19/10/2010	LAST	W9A10COLE_IRR	26.5	-19.5	-1.429245283	-1.811320755	COLE	4	1.5899	1.5899	1.5899	NA	1.5899	2	1.5899	NA	1.5899	1.5899	1.5899	1.5899	3	1.5899	1.5899	NA	1.5899	1.5899	1	NA	1.5899	1.5899	1.5899
980	70995	90670_91	119767	2010	558	4	4	5	W9A10COLE	1559	21	39	1	2	RFD	1.8309	g/100g	19/10/2010	LAST	W9A10COLE_RFD	0.5	-5.5	-1.429245283	-1.811320755	COLE	1	NA	1.8309	1.8309	1.8309	1.8309	2	1.8309	NA	1.8309	1.8309	1.8309	1.8309	1	NA	1.8309	1.8309	1.8309	1.8309	1	NA	1.8309	1.8309	1.8309
981	70996	RAC1442	123544	2010	1888	4	4	6	W9A10YANA	1384	16	64	2	3	RFD	2.0285	g/100g	30/10/10 Hurricane	LAST	W9A10YANA_RFD	19.5	-7	-1.429245283	-1.811320755	YANA	5	2.0285	2.0285	2.0285	2.0285	NA	5	2.0285	2.0285	2.0285	2.0285	NA	2.0285	1	NA	2.0285	2.0285	2.0285	2.0285	4	2.0285	2.0285	2.0285	NA
982	70997	VW0394	125660	2010	2613	4	4	7	W9A10YANA	3500	40	68	2	4	IRR	1.5603	g/100g	30/10/10 Lucerne	LAST	W9A10YANA_IRR	23.5	17	-1.429245283	-1.811320755	YANA	2	1.5603	NA	1.5603	1.5603	1.5603	1	NA	1.5603	1.5603	1.5603	1.5603	1.5603	5	1.5603	1.5603	1.5603	1.5603	NA	2	1.5603	NA	1.5603	1.5603
983	70998	133513_133	120927	2010	945	4	4	8	W9A10COLE	2719	36	59	2	3	RFD	2.2696	g/100g	27/10/10 Lucerne	LAST	W9A10COLE_RFD	20.5	9.5	-1.429245283	-1.811320755	COLE	3	2.2696	2.2696	NA	2.2696	2.2696	4	2.2696	2.2696	2.2696	NA	2.2696	2.2696	2	2.2696	NA	2.2696	2.2696	2.2696	1	NA	2.2696	2.2696	2.2696
984	70999	WW16917	124534	2010	2229	4	4	9	W9A10YANA	2374	27	86	2	4	IRR	1.6843	g/100g	30/10/10 Hurricane	LAST	W9A10YANA_IRR	41.5	4	-1.429245283	-1.811320755	YANA	5	1.6843	1.6843	1.6843	1.6843	NA	3	1.6843	1.6843	NA	1.6843	1.6843	1.6843	3	1.6843	1.6843	NA	1.6843	1.6843	2	1.6843	NA	1.6843	1.6843
985	71000	SUPER_SERI_1	124375	2010	2177	4	4	10	W9A10YANA	2215	26	15	1	1	IRR	2.501	g/100g	23/10/10 Lucerne	LAST	W9A10YANA_IRR	-29.5	3	-1.429245283	-1.811320755	YANA	1	NA	2.501	2.501	2.501	2.501	3	2.501	2.501	NA	2.501	2.501	2.501	5	2.501	2.501	2.501	2.501	NA	1	NA	2.501	2.501	2.501
986	71001	HRZ06_2070	124829	2010	2325	4	4	11	W9A10YANA	2669	31	29	1	2	RFD	2.0649	g/100g	23/10/10 Hurricane	LAST	W9A10YANA_RFD	-15.5	8	-1.429245283	-1.811320755	YANA	2	2.0649	NA	2.0649	2.0649	2.0649	4	2.0649	2.0649	2.0649	NA	2.0649	2.0649	4	2.0649	2.0649	2.0649	NA	2.0649	3	2.0649	2.0649	NA	2.0649
987	71002	HRZ06_0488	123766	2010	1959	4	4	12	W9A10YANA	1606	19	22	1	1	IRR	2.4301	g/100g	23/10/10 Lucerne	LAST	W9A10YANA_IRR	-22.5	-4	-1.429245283	-1.811320755	YANA	3	2.4301	2.4301	NA	2.4301	2.4301	2	2.4301	NA	2.4301	2.4301	2.4301	2.4301	2	2.4301	NA	2.4301	2.4301	2.4301	4	2.4301	2.4301	2.4301	NA
988	71003	HRZ06_0319	123541	2010	1887	4	4	13	W9A10YANA	1381	16	61	2	3	RFD	1.815	g/100g	30/10/10 Lucerne	LAST	W9A10YANA_RFD	16.5	-7	-1.429245283	-1.811320755	YANA	2	1.815	NA	1.815	1.815	1.815	4	1.815	1.815	1.815	NA	1.815	1.815	3	1.815	1.815	NA	1.815	1.815	3	1.815	1.815	NA	1.815
989	71004	WW19525	118743	2010	167	4	4	14	W9A10COLE	535	8	3	1	1	IRR	0.82564	g/100g	12/10/2010	LAST	W9A10COLE_IRR	-35.5	-18.5	-1.429245283	-1.811320755	COLE	1	NA	0.82564	0.82564	0.82564	0.82564	4	0.82564	0.82564	0.82564	NA	0.82564	0.82564	2	0.82564	NA	0.82564	0.82564	0.82564	5	0.82564	0.82564	0.82564	0.82564
990	71005	HRZ04_0154	120826	2010	902	4	4	15	W9A10COLE	2618	35	34	2	3	RFD	1.7196	g/100g	27/10/10 Lucerne	LAST	W9A10COLE_RFD	-4.5	8.5	-1.429245283	-1.811320755	COLE	3	1.7196	1.7196	NA	1.7196	1.7196	3	1.7196	1.7196	NA	1.7196	1.7196	1.7196	4	1.7196	1.7196	1.7196	NA	1.7196	3	1.7196	1.7196	NA	1.7196
991	71006	WW16452	120054	2010	655	4	4	16	W9A10COLE	1846	25	22	1	2	RFD	1.9244	g/100g	12/10/2010	LAST	W9A10COLE_RFD	-16.5	-1.5	-1.429245283	-1.811320755	COLE	2	1.9244	NA	1.9244	1.9244	1.9244	1	NA	1.9244	1.9244	1.9244	1.9244	1.9244	4	1.9244	1.9244	1.9244	NA	1.9244	4	1.9244	1.9244	1.9244	NA
992	71007	114892_109	119887	2010	588	4	4	17	W9A10COLE	1679	23	7	1	2	RFD	2.9838	g/100g	12/10/2010	LAST	W9A10COLE_RFD	-31.5	-3.5	-1.429245283	-1.811320755	COLE	1	NA	2.9838	2.9838	2.9838	2.9838	3	2.9838	2.9838	NA	2.9838	2.9838	2.9838	5	2.9838	2.9838	2.9838	2.9838	NA	5	2.9838	2.9838	2.9838	2.9838
993	71008	WW20469	119690	2010	527	4	4	18	W9A10COLE	1482	20	38	1	2	RFD	1.2675	g/100g	12/10/2010	LAST	W9A10COLE_RFD	-0.5	-6.5	-1.429245283	-1.811320755	COLE	4	1.2675	1.2675	1.2675	NA	1.2675	4	1.2675	1.2675	1.2675	NA	1.2675	1.2675	2	1.2675	NA	1.2675	1.2675	1.2675	2	1.2675	NA	1.2675	1.2675
994	71009	HRZ06_2082	121015	2010	992	4	4	19	W9A10COLE	2807	37	71	2	3	RFD	2.031	g/100g	27/10/10 Lucerne	LAST	W9A10COLE_RFD	32.5	10.5	-1.429245283	-1.811320755	COLE	4	2.031	2.031	2.031	NA	2.031	1	NA	2.031	2.031	2.031	2.031	2.031	4	2.031	2.031	2.031	NA	2.031	4	2.031	2.031	2.031	NA
995	71010	VW2782	120068	2010	660	4	4	20	W9A10COLE	1860	25	36	1	2	RFD	2.1143	g/100g	12/10/2010	LAST	W9A10COLE_RFD	-2.5	-1.5	-1.429245283	-1.811320755	COLE	1	NA	2.1143	2.1143	2.1143	2.1143	3	2.1143	2.1143	NA	2.1143	2.1143	2.1143	4	2.1143	2.1143	2.1143	NA	2.1143	3	2.1143	2.1143	NA	2.1143
996	71011	HRZ04_0161	118923	2010	233	4	4	21	W9A10COLE	715	10	31	1	1	IRR	2.0143	g/100g	19/10/2010	LAST	W9A10COLE_IRR	-7.5	-16.5	-1.429245283	-1.811320755	COLE	4	2.0143	2.0143	2.0143	NA	2.0143	2	2.0143	NA	2.0143	2.0143	2.0143	2.0143	1	NA	2.0143	2.0143	2.0143	2.0143	3	2.0143	2.0143	NA	2.0143
997	71012	VV2856	119682	2010	525	4	4	22	W9A10COLE	1474	20	30	1	2	RFD	2.6153	g/100g	19/10/2010	LAST	W9A10COLE_RFD	-8.5	-6.5	-1.429245283	-1.811320755	COLE	3	2.6153	2.6153	NA	2.6153	2.6153	5	2.6153	2.6153	2.6153	2.6153	NA	2.6153	1	NA	2.6153	2.6153	2.6153	2.6153	2	2.6153	NA	2.6153	2.6153
998	71013	VW3744	119458	2010	460	4	4	23	W9A10COLE	1250	17	34	1	2	RFD	0.76398	g/100g	19/10/2010	LAST	W9A10COLE_RFD	-4.5	-9.5	-1.429245283	-1.811320755	COLE	1	NA	0.76398	0.76398	0.76398	0.76398	4	0.76398	0.76398	0.76398	NA	0.76398	0.76398	3	0.76398	0.76398	NA	0.76398	0.76398	4	0.76398	0.76398	0.76398	NA
999	71014	VW2405	119270	2010	390	4	4	24	W9A10COLE	1062	14	74	1	2	RFD	1.237	g/100g	12/10/2010	LAST	W9A10COLE_RFD	35.5	-12.5	-1.429245283	-1.811320755	COLE	2	1.237	NA	1.237	1.237	1.237	3	1.237	1.237	NA	1.237	1.237	1.237	5	1.237	1.237	1.237	1.237	NA	1	NA	1.237	1.237	1.237
1000	71015	HRZ04_0425	121838	2010	1270	4	4	25	W9A10COLE	3630	48	58	2	4	IRR	1.3344	g/100g	27/10/10 Lucerne	LAST	W9A10COLE_IRR	19.5	21.5	-1.429245283	-1.811320755	COLE	4	1.3344	1.3344	1.3344	NA	1.3344	2	1.3344	NA	1.3344	1.3344	1.3344	1.3344	2	1.3344	NA	1.3344	1.3344	1.3344	2	1.3344	NA	1.3344	1.3344
1001	71016	VW2373	120656	2010	842	4	4	26	W9A10COLE	2448	33	16	2	3	RFD	1.8927	g/100g	27/10/10 Lucerne	LAST	W9A10COLE_RFD	-22.5	6.5	-1.429245283	-1.811320755	COLE	3	1.8927	1.8927	NA	1.8927	1.8927	5	1.8927	1.8927	1.8927	1.8927	NA	1.8927	5	1.8927	1.8927	1.8927	1.8927	NA	5	1.8927	1.8927	1.8927	1.8927
1002	71017	VW1194	119178	2010	342	4	4	27	W9A10COLE	970	13	58	1	1	IRR	2.1096	g/100g	12/10/2010	LAST	W9A10COLE_IRR	19.5	-13.5	-1.429245283	-1.811320755	COLE	4	2.1096	2.1096	2.1096	NA	2.1096	1	NA	2.1096	2.1096	2.1096	2.1096	2.1096	3	2.1096	2.1096	NA	2.1096	2.1096	2	2.1096	NA	2.1096	2.1096
1003	71018	WW19201	118439	2010	75	4	4	28	W9A10COLE	231	4	3	1	1	IRR	1.3848	g/100g	23/10/10 Lucerne	LAST	W9A10COLE_IRR	-35.5	-22.5	-1.429245283	-1.811320755	COLE	4	1.3848	1.3848	1.3848	NA	1.3848	5	1.3848	1.3848	1.3848	1.3848	NA	1.3848	4	1.3848	1.3848	1.3848	NA	1.3848	4	1.3848	1.3848	1.3848	NA
1004	71019	HRZ06_0065	120687	2010	857	4	4	29	W9A10COLE	2479	33	47	2	3	RFD	2.0035	g/100g	27/10/10 Lucerne	LAST	W9A10COLE_RFD	8.5	6.5	-1.429245283	-1.811320755	COLE	3	2.0035	2.0035	NA	2.0035	2.0035	4	2.0035	2.0035	2.0035	NA	2.0035	2.0035	4	2.0035	2.0035	2.0035	NA	2.0035	1	NA	2.0035	2.0035	2.0035
1005	71020	GBA0608	122195	2010	1401	4	4	30	W9A10YANA	35	1	35	1	2	RFD	2.0742	g/100g	23/10/10 Hurricane	LAST	W9A10YANA_RFD	-9.5	-22	-1.429245283	-1.811320755	YANA	1	NA	2.0742	2.0742	2.0742	2.0742	3	2.0742	2.0742	NA	2.0742	2.0742	2.0742	2	2.0742	NA	2.0742	2.0742	2.0742	3	2.0742	2.0742	NA	2.0742
1006	71021	VW2426	120746	2010	877	4	5	1	W9A10COLE	2538	34	30	2	3	RFD	2.2082	g/100g	27/10/10 Lucerne	LAST	W9A10COLE_RFD	-8.5	7.5	-0.429245283	-1.811320755	COLE	4	2.2082	2.2082	2.2082	NA	2.2082	2	2.2082	NA	2.2082	2.2082	2.2082	2.2082	2	2.2082	NA	2.2082	2.2082	2.2082	2	2.2082	NA	2.2082	2.2082
1007	71022	WYUNA	121442	2010	1133	4	5	2	W9A10COLE	3234	43	42	2	4	IRR	1.1191	g/100g	27/10/10 Lucerne	LAST	W9A10COLE_IRR	3.5	16.5	-0.429245283	-1.811320755	COLE	2	1.1191	NA	1.1191	1.1191	1.1191	4	1.1191	1.1191	1.1191	NA	1.1191	1.1191	4	1.1191	1.1191	1.1191	NA	1.1191	4	1.1191	1.1191	1.1191	NA
1008	71023	VW0779	121270	2010	1064	4	5	3	W9A10COLE	3062	41	22	2	4	IRR	1.8155	g/100g	27/10/10 Hurricane	LAST	W9A10COLE_IRR	-16.5	14.5	-0.429245283	-1.811320755	COLE	1	NA	1.8155	1.8155	1.8155	1.8155	5	1.8155	1.8155	1.8155	1.8155	NA	1.8155	3	1.8155	1.8155	NA	1.8155	1.8155	4	1.8155	1.8155	1.8155	NA
1009	71024	HRZ06_2202	121115	2010	1026	4	5	4	W9A10COLE	2907	39	19	2	3	RFD	2.5521	g/100g	27/10/10 Lucerne	LAST	W9A10COLE_RFD	-19.5	12.5	-0.429245283	-1.811320755	COLE	2	2.5521	NA	2.5521	2.5521	2.5521	5	2.5521	2.5521	2.5521	2.5521	NA	2.5521	1	NA	2.5521	2.5521	2.5521	2.5521	3	2.5521	2.5521	NA	2.5521
1010	71025	AUS33466	121764	2010	1240	4	5	5	W9A10COLE	3556	47	60	2	4	IRR	1.598	g/100g	27/10/10 Lucerne	LAST	W9A10COLE_IRR	21.5	20.5	-0.429245283	-1.811320755	COLE	1	NA	1.598	1.598	1.598	1.598	1	NA	1.598	1.598	1.598	1.598	1.598	4	1.598	1.598	1.598	NA	1.598	4	1.598	1.598	1.598	NA
1011	71026	WW18924	119048	2010	274	4	5	6	W9A10COLE	840	12	4	1	1	IRR	1.1725	g/100g	12/10/2010	LAST	W9A10COLE_IRR	-34.5	-14.5	-0.429245283	-1.811320755	COLE	5	1.1725	1.1725	1.1725	1.1725	NA	3	1.1725	1.1725	NA	1.1725	1.1725	1.1725	1	NA	1.1725	1.1725	1.1725	1.1725	2	1.1725	NA	1.1725	1.1725
1012	71027	WW20140	122757	2010	1598	4	5	7	W9A10YANA	597	7	69	2	4	IRR	1.8355	g/100g	30/10/10 Hurricane	LAST	W9A10YANA_IRR	24.5	-16	-0.429245283	-1.811320755	YANA	3	1.8355	1.8355	NA	1.8355	1.8355	4	1.8355	1.8355	1.8355	NA	1.8355	1.8355	4	1.8355	1.8355	1.8355	NA	1.8355	5	1.8355	1.8355	1.8355	1.8355
1013	71028	VW3744	126014	2010	2745	4	5	8	W9A10YANA	3854	44	70	2	4	IRR	1.1074	g/100g	30/10/10 Hurricane	LAST	W9A10YANA_IRR	25.5	21	-0.429245283	-1.811320755	YANA	1	NA	1.1074	1.1074	1.1074	1.1074	4	1.1074	1.1074	1.1074	NA	1.1074	1.1074	3	1.1074	1.1074	NA	1.1074	1.1074	4	1.1074	1.1074	1.1074	NA
1014	71029	WW20680	122170	2010	1392	4	5	9	W9A10YANA	10	1	10	1	1	IRR	1.1007	g/100g	23/10/10 Lucerne	LAST	W9A10YANA_IRR	-34.5	-22	-0.429245283	-1.811320755	YANA	2	1.1007	NA	1.1007	1.1007	1.1007	5	1.1007	1.1007	1.1007	1.1007	NA	1.1007	5	1.1007	1.1007	1.1007	1.1007	NA	2	1.1007	NA	1.1007	1.1007
1015	71030	VW4368	124761	2010	2295	4	5	10	W9A10YANA	2601	30	49	2	3	RFD	1.8542	g/100g	30/10/10 Lucerne	LAST	W9A10YANA_RFD	4.5	7	-0.429245283	-1.811320755	YANA	4	1.8542	1.8542	1.8542	NA	1.8542	3	1.8542	1.8542	NA	1.8542	1.8542	1.8542	2	1.8542	NA	1.8542	1.8542	1.8542	1	NA	1.8542	1.8542	1.8542
1016	71031	WW19660	124893	2010	2345	4	5	11	W9A10YANA	2733	32	5	1	1	IRR	2.0855	g/100g	23/10/10 Lucerne	LAST	W9A10YANA_IRR	-39.5	9	-0.429245283	-1.811320755	YANA	1	NA	2.0855	2.0855	2.0855	2.0855	2	2.0855	NA	2.0855	2.0855	2.0855	2.0855	1	NA	2.0855	2.0855	2.0855	2.0855	2	2.0855	NA	2.0855	2.0855
1017	71032	AUS33697	120147	2010	685	4	5	12	W9A10COLE	1939	26	39	1	2	RFD	2.1817	g/100g	12/10/2010	LAST	W9A10COLE_RFD	0.5	-0.5	-0.429245283	-1.811320755	COLE	3	2.1817	2.1817	NA	2.1817	2.1817	2	2.1817	NA	2.1817	2.1817	2.1817	2.1817	5	2.1817	2.1817	2.1817	2.1817	NA	1	NA	2.1817	2.1817	2.1817
1018	71034	LPB03_1109	125093	2010	2414	4	5	14	W9A10YANA	2933	34	29	1	2	RFD	2.5027	g/100g	23/10/10 Hurricane	LAST	W9A10YANA_RFD	-15.5	11	-0.429245283	-1.811320755	YANA	1	NA	2.5027	2.5027	2.5027	2.5027	5	2.5027	2.5027	2.5027	2.5027	NA	2.5027	4	2.5027	2.5027	2.5027	NA	2.5027	1	NA	2.5027	2.5027	2.5027
1019	71035	VW3708	121604	2010	1191	4	5	15	W9A10COLE	3396	45	52	2	4	IRR	1.8424	g/100g	27/10/10 Lucerne	LAST	W9A10COLE_IRR	13.5	18.5	-0.429245283	-1.811320755	COLE	4	1.8424	1.8424	1.8424	NA	1.8424	2	1.8424	NA	1.8424	1.8424	1.8424	1.8424	2	1.8424	NA	1.8424	1.8424	1.8424	4	1.8424	1.8424	1.8424	NA
1020	71036	HRZ06_0033	120616	2010	824	4	5	16	W9A10COLE	2408	32	52	2	3	RFD	1.3992	g/100g	27/10/10 Lucerne	LAST	W9A10COLE_RFD	13.5	5.5	-0.429245283	-1.811320755	COLE	2	1.3992	NA	1.3992	1.3992	1.3992	3	1.3992	1.3992	NA	1.3992	1.3992	1.3992	5	1.3992	1.3992	1.3992	1.3992	NA	4	1.3992	1.3992	1.3992	NA
1021	71037	CURRAWONG	122902	2010	1650	4	5	17	W9A10YANA	742	9	38	1	2	RFD	1.7296	g/100g	23/10/10 Hurricane	LAST	W9A10YANA_RFD	-6.5	-14	-0.429245283	-1.811320755	YANA	5	1.7296	1.7296	1.7296	1.7296	NA	4	1.7296	1.7296	1.7296	NA	1.7296	1.7296	3	1.7296	1.7296	NA	1.7296	1.7296	3	1.7296	1.7296	NA	1.7296
1022	71038	SUNVALE	119098	2010	303	4	5	18	W9A10COLE	890	12	54	1	1	IRR	2.2796	g/100g	12/10/2010	LAST	W9A10COLE_IRR	15.5	-14.5	-0.429245283	-1.811320755	COLE	2	2.2796	NA	2.2796	2.2796	2.2796	1	NA	2.2796	2.2796	2.2796	2.2796	2.2796	5	2.2796	2.2796	2.2796	2.2796	NA	3	2.2796	2.2796	NA	2.2796
1023	71039	HRZ04_0511	122590	2010	1539	4	5	19	W9A10YANA	430	5	78	2	4	IRR	1.7591	g/100g	30/10/10 Lucerne	LAST	W9A10YANA_IRR	33.5	-18	-0.429245283	-1.811320755	YANA	3	1.7591	1.7591	NA	1.7591	1.7591	1	NA	1.7591	1.7591	1.7591	1.7591	1.7591	1	NA	1.7591	1.7591	1.7591	1.7591	5	1.7591	1.7591	1.7591	1.7591
1024	71040	WW19365	122029	2010	1339	4	5	20	W9A10COLE	3821	51	21	2	4	IRR	2.0013	g/100g	27/10/10 Lucerne	LAST	W9A10COLE_IRR	-17.5	24.5	-0.429245283	-1.811320755	COLE	5	2.0013	2.0013	2.0013	2.0013	NA	4	2.0013	2.0013	2.0013	NA	2.0013	2.0013	1	NA	2.0013	2.0013	2.0013	2.0013	2	2.0013	NA	2.0013	2.0013
1025	71041	VQ2791	121814	2010	1259	4	5	21	W9A10COLE	3606	48	34	2	4	IRR	1.6149	g/100g	27/10/10 Hurricane	LAST	W9A10COLE_IRR	-4.5	21.5	-0.429245283	-1.811320755	COLE	3	1.6149	1.6149	NA	1.6149	1.6149	4	1.6149	1.6149	1.6149	NA	1.6149	1.6149	4	1.6149	1.6149	1.6149	NA	1.6149	4	1.6149	1.6149	1.6149	NA
1026	71042	DIAMONDBIRD	120946	2010	957	4	5	22	W9A10COLE	2738	37	2	2	3	RFD	1.5828	g/100g	27/10/10 Lucerne	LAST	W9A10COLE_RFD	-36.5	10.5	-0.429245283	-1.811320755	COLE	4	1.5828	1.5828	1.5828	NA	1.5828	1	NA	1.5828	1.5828	1.5828	1.5828	1.5828	2	1.5828	NA	1.5828	1.5828	1.5828	4	1.5828	1.5828	1.5828	NA
1027	71043	VW0857	125815	2010	2667	4	5	23	W9A10YANA	3655	42	47	2	3	RFD	1.7641	g/100g	30/10/10 Lucerne	LAST	W9A10YANA_RFD	2.5	19	-0.429245283	-1.811320755	YANA	5	1.7641	1.7641	1.7641	1.7641	NA	2	1.7641	NA	1.7641	1.7641	1.7641	1.7641	4	1.7641	1.7641	1.7641	NA	1.7641	4	1.7641	1.7641	1.7641	NA
1028	71044	WW19492	125193	2010	2449	4	5	24	W9A10YANA	3033	35	41	1	2	RFD	2.2368	g/100g	23/10/10 Hurricane	LAST	W9A10YANA_RFD	-3.5	12	-0.429245283	-1.811320755	YANA	2	2.2368	NA	2.2368	2.2368	2.2368	1	NA	2.2368	2.2368	2.2368	2.2368	2.2368	5	2.2368	2.2368	2.2368	2.2368	NA	3	2.2368	2.2368	NA	2.2368
1029	71045	VW2001	123092	2010	1721	4	5	25	W9A10YANA	932	11	52	2	3	RFD	2.2696	g/100g	30/10/10 Hurricane	LAST	W9A10YANA_RFD	7.5	-12	-0.429245283	-1.811320755	YANA	2	2.2696	NA	2.2696	2.2696	2.2696	5	2.2696	2.2696	2.2696	2.2696	NA	2.2696	4	2.2696	2.2696	2.2696	NA	2.2696	3	2.2696	2.2696	NA	2.2696
1030	71046	EGA_WILLS	119278	2010	394	4	5	26	W9A10COLE	1070	15	6	1	2	RFD	1.9337	g/100g	19/10/2010	LAST	W9A10COLE_RFD	-32.5	-11.5	-0.429245283	-1.811320755	COLE	3	1.9337	1.9337	NA	1.9337	1.9337	1	NA	1.9337	1.9337	1.9337	1.9337	1.9337	5	1.9337	1.9337	1.9337	1.9337	NA	2	1.9337	NA	1.9337	1.9337
1031	71047	QT12844	124390	2010	2186	4	5	27	W9A10YANA	2230	26	30	1	2	RFD	2.7337	g/100g	23/10/10 Hurricane	LAST	W9A10YANA_RFD	-14.5	3	-0.429245283	-1.811320755	YANA	2	2.7337	NA	2.7337	2.7337	2.7337	1	NA	2.7337	2.7337	2.7337	2.7337	2.7337	1	NA	2.7337	2.7337	2.7337	2.7337	4	2.7337	2.7337	2.7337	NA
1032	71048	VW1864	123755	2010	1955	4	5	28	W9A10YANA	1595	19	11	1	1	IRR	1.8033	g/100g	23/10/10 Hurricane	LAST	W9A10YANA_IRR	-33.5	-4	-0.429245283	-1.811320755	YANA	5	1.8033	1.8033	1.8033	1.8033	NA	1	NA	1.8033	1.8033	1.8033	1.8033	1.8033	4	1.8033	1.8033	1.8033	NA	1.8033	4	1.8033	1.8033	1.8033	NA
1033	71049	WW19561	120586	2010	815	4	5	29	W9A10COLE	2378	32	22	2	3	RFD	2.499	g/100g	27/10/10 Lucerne	LAST	W9A10COLE_RFD	-16.5	5.5	-0.429245283	-1.811320755	COLE	5	2.499	2.499	2.499	2.499	NA	2	2.499	NA	2.499	2.499	2.499	2.499	2	2.499	NA	2.499	2.499	2.499	4	2.499	2.499	2.499	NA
1034	71050	B1272C4	121289	2010	1074	4	5	30	W9A10COLE	3081	41	41	2	4	IRR	1.5346	g/100g	27/10/10 Lucerne	LAST	W9A10COLE_IRR	2.5	14.5	-0.429245283	-1.811320755	COLE	1	NA	1.5346	1.5346	1.5346	1.5346	1	NA	1.5346	1.5346	1.5346	1.5346	1.5346	2	1.5346	NA	1.5346	1.5346	1.5346	3	1.5346	1.5346	NA	1.5346
1035	71051	WW20214	124477	2010	2211	4	6	1	W9A10YANA	2317	27	29	1	2	RFD	1.8827	g/100g	23/10/10 Hurricane	LAST	W9A10YANA_RFD	-15.5	4	0.570754717	-1.811320755	YANA	2	1.8827	NA	1.8827	1.8827	1.8827	2	1.8827	NA	1.8827	1.8827	1.8827	1.8827	3	1.8827	1.8827	NA	1.8827	1.8827	4	1.8827	1.8827	1.8827	NA
1036	71052	HRZ06_0043	120346	2010	742	4	6	2	W9A10COLE	2138	29	10	2	3	RFD	2.1842	g/100g	27/10/10 Lucerne	LAST	W9A10COLE_RFD	-28.5	2.5	0.570754717	-1.811320755	COLE	5	2.1842	2.1842	2.1842	2.1842	NA	3	2.1842	2.1842	NA	2.1842	2.1842	2.1842	1	NA	2.1842	2.1842	2.1842	2.1842	1	NA	2.1842	2.1842	2.1842
1037	71053	VW1286	121606	2010	1193	4	6	3	W9A10COLE	3398	45	54	2	4	IRR	2.3761	g/100g	27/10/10 Lucerne	LAST	W9A10COLE_IRR	15.5	18.5	0.570754717	-1.811320755	COLE	3	2.3761	2.3761	NA	2.3761	2.3761	5	2.3761	2.3761	2.3761	2.3761	NA	2.3761	3	2.3761	2.3761	NA	2.3761	2.3761	4	2.3761	2.3761	2.3761	NA
1038	71054	WW19743	120641	2010	836	4	6	4	W9A10COLE	2433	33	1	2	3	RFD	1.8544	g/100g	27/10/10 Lucerne	LAST	W9A10COLE_RFD	-37.5	6.5	0.570754717	-1.811320755	COLE	5	1.8544	1.8544	1.8544	1.8544	NA	3	1.8544	1.8544	NA	1.8544	1.8544	1.8544	2	1.8544	NA	1.8544	1.8544	1.8544	3	1.8544	1.8544	NA	1.8544
1039	71055	HRZ06_0514	124526	2010	2228	4	6	5	W9A10YANA	2366	27	78	2	4	IRR	1.7359	g/100g	30/10/10 Lucerne	LAST	W9A10YANA_IRR	33.5	4	0.570754717	-1.811320755	YANA	3	1.7359	1.7359	NA	1.7359	1.7359	5	1.7359	1.7359	1.7359	1.7359	NA	1.7359	4	1.7359	1.7359	1.7359	NA	1.7359	4	1.7359	1.7359	1.7359	NA
1040	71056	VW2092	119643	2010	515	4	6	6	W9A10COLE	1435	19	67	1	2	RFD	2.1739	g/100g	12/10/2010	LAST	W9A10COLE_RFD	28.5	-7.5	0.570754717	-1.811320755	COLE	4	2.1739	2.1739	2.1739	NA	2.1739	3	2.1739	2.1739	NA	2.1739	2.1739	2.1739	1	NA	2.1739	2.1739	2.1739	2.1739	3	2.1739	2.1739	NA	2.1739
1041	71057	VW0760	124279	2010	2139	4	6	7	W9A10YANA	2119	25	7	1	1	IRR	1.9368	g/100g	23/10/10 Lucerne	LAST	W9A10YANA_IRR	-37.5	2	0.570754717	-1.811320755	YANA	4	1.9368	1.9368	1.9368	NA	1.9368	2	1.9368	NA	1.9368	1.9368	1.9368	1.9368	1	NA	1.9368	1.9368	1.9368	1.9368	3	1.9368	1.9368	NA	1.9368
1042	71058	WW18769	118583	2010	124	4	6	8	W9A10COLE	375	5	71	1	1	IRR	1.5107	g/100g	19/10/2010	LAST	W9A10COLE_IRR	32.5	-21.5	0.570754717	-1.811320755	COLE	4	1.5107	1.5107	1.5107	NA	1.5107	1	NA	1.5107	1.5107	1.5107	1.5107	1.5107	3	1.5107	1.5107	NA	1.5107	1.5107	1	NA	1.5107	1.5107	1.5107
1043	71059	WW19684	122799	2010	1610	4	6	9	W9A10YANA	639	8	23	1	2	RFD	2.4426	g/100g	23/10/10 Hurricane	LAST	W9A10YANA_RFD	-21.5	-15	0.570754717	-1.811320755	YANA	5	2.4426	2.4426	2.4426	2.4426	NA	2	2.4426	NA	2.4426	2.4426	2.4426	2.4426	5	2.4426	2.4426	2.4426	2.4426	NA	2	2.4426	NA	2.4426	2.4426
1044	71060	HRZ04_0188	124770	2010	2297	4	6	10	W9A10YANA	2610	30	58	2	3	RFD	1.7894	g/100g	30/10/10 Lucerne	LAST	W9A10YANA_RFD	13.5	7	0.570754717	-1.811320755	YANA	5	1.7894	1.7894	1.7894	1.7894	NA	2	1.7894	NA	1.7894	1.7894	1.7894	1.7894	2	1.7894	NA	1.7894	1.7894	1.7894	3	1.7894	1.7894	NA	1.7894
1045	71061	DIAMONDBIRD	125814	2010	2666	4	6	11	W9A10YANA	3654	42	46	2	3	RFD	1.8891	g/100g	30/10/10 Lucerne	LAST	W9A10YANA_RFD	1.5	19	0.570754717	-1.811320755	YANA	4	1.8891	1.8891	1.8891	NA	1.8891	1	NA	1.8891	1.8891	1.8891	1.8891	1.8891	2	1.8891	NA	1.8891	1.8891	1.8891	4	1.8891	1.8891	1.8891	NA
1046	71062	GLADIUS	122264	2010	1428	4	6	12	W9A10YANA	104	2	16	1	1	IRR	2.2739	g/100g	23/10/10 Lucerne	LAST	W9A10YANA_IRR	-28.5	-21	0.570754717	-1.811320755	YANA	4	2.2739	2.2739	2.2739	NA	2.2739	5	2.2739	2.2739	2.2739	2.2739	NA	2.2739	4	2.2739	2.2739	2.2739	NA	2.2739	5	2.2739	2.2739	2.2739	2.2739
1047	71063	WW21843	124973	2010	2373	4	6	13	W9A10YANA	2813	32	85	2	4	IRR	1.3599	g/100g	30/10/10 Lucerne	LAST	W9A10YANA_IRR	40.5	9	0.570754717	-1.811320755	YANA	4	1.3599	1.3599	1.3599	NA	1.3599	4	1.3599	1.3599	1.3599	NA	1.3599	1.3599	3	1.3599	1.3599	NA	1.3599	1.3599	1	NA	1.3599	1.3599	1.3599
1048	71064	VW2694	118796	2010	190	4	6	14	W9A10COLE	588	8	56	1	1	IRR	1.4278	g/100g	12/10/2010	LAST	W9A10COLE_IRR	17.5	-18.5	0.570754717	-1.811320755	COLE	4	1.4278	1.4278	1.4278	NA	1.4278	5	1.4278	1.4278	1.4278	1.4278	NA	1.4278	5	1.4278	1.4278	1.4278	1.4278	NA	1	NA	1.4278	1.4278	1.4278
1049	71065	VW0990	125270	2010	2481	4	6	15	W9A10YANA	3110	36	30	1	2	RFD	2.4758	g/100g	23/10/10 Hurricane	LAST	W9A10YANA_RFD	-14.5	13	0.570754717	-1.811320755	YANA	3	2.4758	2.4758	NA	2.4758	2.4758	4	2.4758	2.4758	2.4758	NA	2.4758	2.4758	2	2.4758	NA	2.4758	2.4758	2.4758	2	2.4758	NA	2.4758	2.4758
1050	71066	CRUSADER	123121	2010	1734	4	6	16	W9A10YANA	961	11	81	2	4	IRR	1.6572	g/100g	30/10/10 Lucerne	LAST	W9A10YANA_IRR	36.5	-12	0.570754717	-1.811320755	YANA	2	1.6572	NA	1.6572	1.6572	1.6572	1	NA	1.6572	1.6572	1.6572	1.6572	1.6572	4	1.6572	1.6572	1.6572	NA	1.6572	2	1.6572	NA	1.6572	1.6572
1051	71067	VT1308	118522	2010	103	4	6	17	W9A10COLE	314	5	10	1	1	IRR	1.6635	g/100g	12/10/2010	LAST	W9A10COLE_IRR	-28.5	-21.5	0.570754717	-1.811320755	COLE	2	1.6635	NA	1.6635	1.6635	1.6635	5	1.6635	1.6635	1.6635	1.6635	NA	1.6635	3	1.6635	1.6635	NA	1.6635	1.6635	3	1.6635	1.6635	NA	1.6635
1052	71068	WW20689	125651	2010	2609	4	6	18	W9A10YANA	3491	40	59	2	3	RFD	1.8235	g/100g	30/10/10 Lucerne	LAST	W9A10YANA_RFD	14.5	17	0.570754717	-1.811320755	YANA	1	NA	1.8235	1.8235	1.8235	1.8235	1	NA	1.8235	1.8235	1.8235	1.8235	1.8235	4	1.8235	1.8235	1.8235	NA	1.8235	1	NA	1.8235	1.8235	1.8235
1053	71069	HRZ05_0245	124492	2010	2213	4	6	19	W9A10YANA	2332	27	44	1	2	RFD	1.8903	g/100g	23/10/10 Hurricane	LAST	W9A10YANA_RFD	-0.5	4	0.570754717	-1.811320755	YANA	3	1.8903	1.8903	NA	1.8903	1.8903	3	1.8903	1.8903	NA	1.8903	1.8903	1.8903	3	1.8903	1.8903	NA	1.8903	1.8903	5	1.8903	1.8903	1.8903	1.8903
1054	71070	WYLAH	122682	2010	1575	4	6	20	W9A10YANA	522	6	82	2	4	IRR	0.52982	g/100g	30/10/10 Hurricane	LAST	W9A10YANA_IRR	37.5	-17	0.570754717	-1.811320755	YANA	5	0.52982	0.52982	0.52982	0.52982	NA	4	0.52982	0.52982	0.52982	NA	0.52982	0.52982	4	0.52982	0.52982	0.52982	NA	0.52982	1	NA	0.52982	0.52982	0.52982
1055	71071	WW19663	120137	2010	683	4	6	21	W9A10COLE	1929	26	29	1	2	RFD	1.4801	g/100g	12/10/2010	LAST	W9A10COLE_RFD	-9.5	-0.5	0.570754717	-1.811320755	COLE	1	NA	1.4801	1.4801	1.4801	1.4801	5	1.4801	1.4801	1.4801	1.4801	NA	1.4801	3	1.4801	1.4801	NA	1.4801	1.4801	2	1.4801	NA	1.4801	1.4801
1056	71072	WW19932	123072	2010	1717	4	6	22	W9A10YANA	912	11	32	1	2	RFD	1.9925	g/100g	23/10/10 Hurricane	LAST	W9A10YANA_RFD	-12.5	-12	0.570754717	-1.811320755	YANA	3	1.9925	1.9925	NA	1.9925	1.9925	5	1.9925	1.9925	1.9925	1.9925	NA	1.9925	4	1.9925	1.9925	1.9925	NA	1.9925	5	1.9925	1.9925	1.9925	1.9925
1057	71073	HRZ05_0224	122696	2010	1579	4	6	23	W9A10YANA	536	7	8	1	1	IRR	1.4173	g/100g	23/10/10 Lucerne	LAST	W9A10YANA_IRR	-36.5	-16	0.570754717	-1.811320755	YANA	5	1.4173	1.4173	1.4173	1.4173	NA	2	1.4173	NA	1.4173	1.4173	1.4173	1.4173	3	1.4173	1.4173	NA	1.4173	1.4173	4	1.4173	1.4173	1.4173	NA
1058	71074	WW20406	123681	2010	1928	4	6	24	W9A10YANA	1521	18	25	1	2	RFD	2.0388	g/100g	23/10/10 Hurricane	LAST	W9A10YANA_RFD	-19.5	-5	0.570754717	-1.811320755	YANA	3	2.0388	2.0388	NA	2.0388	2.0388	2	2.0388	NA	2.0388	2.0388	2.0388	2.0388	5	2.0388	2.0388	2.0388	2.0388	NA	5	2.0388	2.0388	2.0388	2.0388
1059	71075	HRZ05_0283	118415	2010	62	4	6	25	W9A10COLE	207	3	55	1	1	IRR	1.9109	g/100g	12/10/2010	LAST	W9A10COLE_IRR	16.5	-23.5	0.570754717	-1.811320755	COLE	4	1.9109	1.9109	1.9109	NA	1.9109	1	NA	1.9109	1.9109	1.9109	1.9109	1.9109	1	NA	1.9109	1.9109	1.9109	1.9109	4	1.9109	1.9109	1.9109	NA
1060	71076	HRZ06_0491	125337	2010	2506	4	6	26	W9A10YANA	3177	37	9	1	1	IRR	2.0078	g/100g	23/10/10 Lucerne	LAST	W9A10YANA_IRR	-35.5	14	0.570754717	-1.811320755	YANA	3	2.0078	2.0078	NA	2.0078	2.0078	4	2.0078	2.0078	2.0078	NA	2.0078	2.0078	2	2.0078	NA	2.0078	2.0078	2.0078	3	2.0078	2.0078	NA	2.0078
1061	71077	WW19746	125585	2010	2590	4	6	27	W9A10YANA	3425	39	81	2	4	IRR	1.3768	g/100g	30/10/10 Hurricane	LAST	W9A10YANA_IRR	36.5	16	0.570754717	-1.811320755	YANA	4	1.3768	1.3768	1.3768	NA	1.3768	4	1.3768	1.3768	1.3768	NA	1.3768	1.3768	4	1.3768	1.3768	1.3768	NA	1.3768	2	1.3768	NA	1.3768	1.3768
1062	71078	VW2782	118402	2010	58	4	6	28	W9A10COLE	194	3	42	1	1	IRR	1.4949	g/100g	12/10/2010	LAST	W9A10COLE_IRR	3.5	-23.5	0.570754717	-1.811320755	COLE	1	NA	1.4949	1.4949	1.4949	1.4949	3	1.4949	1.4949	NA	1.4949	1.4949	1.4949	4	1.4949	1.4949	1.4949	NA	1.4949	3	1.4949	1.4949	NA	1.4949
1063	71079	WW19662	125689	2010	2626	4	6	29	W9A10YANA	3529	41	9	1	1	IRR	1.8846	g/100g	23/10/10 Lucerne	LAST	W9A10YANA_IRR	-35.5	18	0.570754717	-1.811320755	YANA	4	1.8846	1.8846	1.8846	NA	1.8846	5	1.8846	1.8846	1.8846	1.8846	NA	1.8846	5	1.8846	1.8846	1.8846	1.8846	NA	1	NA	1.8846	1.8846	1.8846
1064	71080	VW3744	120274	2010	720	4	6	30	W9A10COLE	2066	28	14	2	3	RFD	1.6304	g/100g	27/10/10 Lucerne	LAST	W9A10COLE_RFD	-24.5	1.5	0.570754717	-1.811320755	COLE	1	NA	1.6304	1.6304	1.6304	1.6304	4	1.6304	1.6304	1.6304	NA	1.6304	1.6304	3	1.6304	1.6304	NA	1.6304	1.6304	4	1.6304	1.6304	1.6304	NA
1065	71081	VW0823	120039	2010	648	4	7	1	W9A10COLE	1831	25	7	1	2	RFD	2.0157	g/100g	19/10/2010	LAST	W9A10COLE_RFD	-31.5	-1.5	1.570754717	-1.811320755	COLE	3	2.0157	2.0157	NA	2.0157	2.0157	3	2.0157	2.0157	NA	2.0157	2.0157	2.0157	4	2.0157	2.0157	2.0157	NA	2.0157	4	2.0157	2.0157	2.0157	NA
1066	71083	WW18784	122600	2010	1545	4	7	3	W9A10YANA	440	5	88	2	4	IRR	1.2081	g/100g	30/10/10 Lucerne	LAST	W9A10YANA_IRR	43.5	-18	1.570754717	-1.811320755	YANA	2	1.2081	NA	1.2081	1.2081	1.2081	4	1.2081	1.2081	1.2081	NA	1.2081	1.2081	3	1.2081	1.2081	NA	1.2081	1.2081	1	NA	1.2081	1.2081	1.2081
1067	71084	HRZ04_0533	122282	2010	1435	4	7	4	W9A10YANA	122	2	34	1	2	RFD	2.5869	g/100g	23/10/10 Hurricane	LAST	W9A10YANA_RFD	-10.5	-21	1.570754717	-1.811320755	YANA	3	2.5869	2.5869	NA	2.5869	2.5869	3	2.5869	2.5869	NA	2.5869	2.5869	2.5869	1	NA	2.5869	2.5869	2.5869	2.5869	3	2.5869	2.5869	NA	2.5869
1068	71085	HRZ06_0034	124143	2010	2096	4	7	5	W9A10YANA	1983	23	47	2	3	RFD	1.7827	g/100g	30/10/10 Lucerne	LAST	W9A10YANA_RFD	2.5	0	1.570754717	-1.811320755	YANA	3	1.7827	1.7827	NA	1.7827	1.7827	1	NA	1.7827	1.7827	1.7827	1.7827	1.7827	1	NA	1.7827	1.7827	1.7827	1.7827	3	1.7827	1.7827	NA	1.7827
1069	71086	WW17950	119642	2010	514	4	7	6	W9A10COLE	1434	19	66	1	2	RFD	1.3118	g/100g	12/10/2010	LAST	W9A10COLE_RFD	27.5	-7.5	1.570754717	-1.811320755	COLE	1	NA	1.3118	1.3118	1.3118	1.3118	2	1.3118	NA	1.3118	1.3118	1.3118	1.3118	1	NA	1.3118	1.3118	1.3118	1.3118	3	1.3118	1.3118	NA	1.3118
1070	71087	VW4056	124365	2010	2174	4	7	7	W9A10YANA	2205	26	5	1	1	IRR	2.3129	g/100g	23/10/10 Hurricane	LAST	W9A10YANA_IRR	-39.5	3	1.570754717	-1.811320755	YANA	2	2.3129	NA	2.3129	2.3129	2.3129	3	2.3129	2.3129	NA	2.3129	2.3129	2.3129	4	2.3129	2.3129	2.3129	NA	2.3129	1	NA	2.3129	2.3129	2.3129
1071	71088	VW3397	120056	2010	656	4	7	8	W9A10COLE	1848	25	24	1	2	RFD	1.3039	g/100g	19/10/2010	LAST	W9A10COLE_RFD	-14.5	-1.5	1.570754717	-1.811320755	COLE	1	NA	1.3039	1.3039	1.3039	1.3039	5	1.3039	1.3039	1.3039	1.3039	NA	1.3039	5	1.3039	1.3039	1.3039	1.3039	NA	4	1.3039	1.3039	1.3039	NA
1072	71089	VT1020	123131	2010	1738	4	7	9	W9A10YANA	971	12	3	1	1	IRR	2.0453	g/100g	23/10/10 Lucerne	LAST	W9A10YANA_IRR	-41.5	-11	1.570754717	-1.811320755	YANA	4	2.0453	2.0453	2.0453	NA	2.0453	3	2.0453	2.0453	NA	2.0453	2.0453	2.0453	2	2.0453	NA	2.0453	2.0453	2.0453	5	2.0453	2.0453	2.0453	2.0453
1073	71090	WW21687	121515	2010	1163	4	7	10	W9A10COLE	3307	44	39	2	4	IRR	1.3748	g/100g	27/10/10 Lucerne	LAST	W9A10COLE_IRR	0.5	17.5	1.570754717	-1.811320755	COLE	3	1.3748	1.3748	NA	1.3748	1.3748	3	1.3748	1.3748	NA	1.3748	1.3748	1.3748	2	1.3748	NA	1.3748	1.3748	1.3748	5	1.3748	1.3748	1.3748	1.3748
1074	71091	WW13735	121695	2010	1219	4	7	11	W9A10COLE	3487	46	67	2	4	IRR	2.3091	g/100g	27/10/10 Hurricane	LAST	W9A10COLE_IRR	28.5	19.5	1.570754717	-1.811320755	COLE	1	NA	2.3091	2.3091	2.3091	2.3091	2	2.3091	NA	2.3091	2.3091	2.3091	2.3091	1	NA	2.3091	2.3091	2.3091	2.3091	5	2.3091	2.3091	2.3091	2.3091
1075	71092	VW3708	123470	2010	1858	4	7	12	W9A10YANA	1310	15	78	2	4	IRR	1.6157	g/100g	30/10/10 Lucerne	LAST	W9A10YANA_IRR	33.5	-8	1.570754717	-1.811320755	YANA	4	1.6157	1.6157	1.6157	NA	1.6157	2	1.6157	NA	1.6157	1.6157	1.6157	1.6157	2	1.6157	NA	1.6157	1.6157	1.6157	4	1.6157	1.6157	1.6157	NA
1076	71093	DRYSDALE	120909	2010	932	4	7	13	W9A10COLE	2701	36	41	2	3	RFD	1.9834	g/100g	27/10/10 Lucerne	LAST	W9A10COLE_RFD	2.5	9.5	1.570754717	-1.811320755	COLE	2	1.9834	NA	1.9834	1.9834	1.9834	3	1.9834	1.9834	NA	1.9834	1.9834	1.9834	4	1.9834	1.9834	1.9834	NA	1.9834	2	1.9834	NA	1.9834	1.9834
1077	71094	WAWHT3016	119631	2010	511	4	7	14	W9A10COLE	1423	19	55	1	2	RFD	2.8239	g/100g	12/10/2010	LAST	W9A10COLE_RFD	16.5	-7.5	1.570754717	-1.811320755	COLE	3	2.8239	2.8239	NA	2.8239	2.8239	5	2.8239	2.8239	2.8239	2.8239	NA	2.8239	5	2.8239	2.8239	2.8239	2.8239	NA	2	2.8239	NA	2.8239	2.8239
1078	71095	WW19147	118471	2010	86	4	7	15	W9A10COLE	263	4	35	1	1	IRR	1.5273	g/100g	12/10/2010	LAST	W9A10COLE_IRR	-3.5	-22.5	1.570754717	-1.811320755	COLE	5	1.5273	1.5273	1.5273	1.5273	NA	4	1.5273	1.5273	1.5273	NA	1.5273	1.5273	4	1.5273	1.5273	1.5273	NA	1.5273	2	1.5273	NA	1.5273	1.5273
1079	71096	WW21873	122707	2010	1581	4	7	16	W9A10YANA	547	7	19	1	1	IRR	0.94524	g/100g	23/10/10 Lucerne	LAST	W9A10YANA_IRR	-25.5	-16	1.570754717	-1.811320755	YANA	3	0.94524	0.94524	NA	0.94524	0.94524	2	0.94524	NA	0.94524	0.94524	0.94524	0.94524	2	0.94524	NA	0.94524	0.94524	0.94524	3	0.94524	0.94524	NA	0.94524
1080	71097	H45	125207	2010	2454	4	7	17	W9A10YANA	3047	35	55	2	3	RFD	2.0969	g/100g	30/10/10 Lucerne	LAST	W9A10YANA_RFD	10.5	12	1.570754717	-1.811320755	YANA	1	NA	2.0969	2.0969	2.0969	2.0969	3	2.0969	2.0969	NA	2.0969	2.0969	2.0969	5	2.0969	2.0969	2.0969	2.0969	NA	5	2.0969	2.0969	2.0969	2.0969
1081	71098	WW20068	121075	2010	1018	4	7	18	W9A10COLE	2867	38	55	2	3	RFD	2.4046	g/100g	27/10/10 Lucerne	LAST	W9A10COLE_RFD	16.5	11.5	1.570754717	-1.811320755	COLE	3	2.4046	2.4046	NA	2.4046	2.4046	1	NA	2.4046	2.4046	2.4046	2.4046	2.4046	1	NA	2.4046	2.4046	2.4046	2.4046	2	2.4046	NA	2.4046	2.4046
1082	71099	PEAKE	120907	2010	931	4	7	19	W9A10COLE	2699	36	39	2	3	RFD	1.9155	g/100g	27/10/10 Lucerne	LAST	W9A10COLE_RFD	0.5	9.5	1.570754717	-1.811320755	COLE	5	1.9155	1.9155	1.9155	1.9155	NA	4	1.9155	1.9155	1.9155	NA	1.9155	1.9155	1	NA	1.9155	1.9155	1.9155	1.9155	4	1.9155	1.9155	1.9155	NA
1083	71100	VW3457	119306	2010	406	4	7	20	W9A10COLE	1098	15	34	1	2	RFD	1.4563	g/100g	12/10/2010	LAST	W9A10COLE_RFD	-4.5	-11.5	1.570754717	-1.811320755	COLE	3	1.4563	1.4563	NA	1.4563	1.4563	1	NA	1.4563	1.4563	1.4563	1.4563	1.4563	4	1.4563	1.4563	1.4563	NA	1.4563	4	1.4563	1.4563	1.4563	NA
1084	71101	VW0644	120464	2010	777	4	7	21	W9A10COLE	2256	30	52	2	3	RFD	1.877	g/100g	27/10/10 Lucerne	LAST	W9A10COLE_RFD	13.5	3.5	1.570754717	-1.811320755	COLE	5	1.877	1.877	1.877	1.877	NA	1	NA	1.877	1.877	1.877	1.877	1.877	3	1.877	1.877	NA	1.877	1.877	4	1.877	1.877	1.877	NA
1085	71102	WW18569	120542	2010	800	4	7	22	W9A10COLE	2334	31	54	2	3	RFD	1.6916	g/100g	27/10/10 Lucerne	LAST	W9A10COLE_RFD	15.5	4.5	1.570754717	-1.811320755	COLE	5	1.6916	1.6916	1.6916	1.6916	NA	2	1.6916	NA	1.6916	1.6916	1.6916	1.6916	1	NA	1.6916	1.6916	1.6916	1.6916	5	1.6916	1.6916	1.6916	1.6916
1086	71103	WW19514	122009	2010	1333	4	7	23	W9A10COLE	3801	51	1	2	4	IRR	1.9484	g/100g	27/10/10 Lucerne	LAST	W9A10COLE_IRR	-37.5	24.5	1.570754717	-1.811320755	COLE	2	1.9484	NA	1.9484	1.9484	1.9484	2	1.9484	NA	1.9484	1.9484	1.9484	1.9484	4	1.9484	1.9484	1.9484	NA	1.9484	4	1.9484	1.9484	1.9484	NA
1087	71104	HRZ06_0491	120112	2010	675	4	7	24	W9A10COLE	1904	26	4	1	2	RFD	2.2336	g/100g	23/10/10 Lucerne	LAST	W9A10COLE_RFD	-34.5	-0.5	1.570754717	-1.811320755	COLE	3	2.2336	2.2336	NA	2.2336	2.2336	4	2.2336	2.2336	2.2336	NA	2.2336	2.2336	2	2.2336	NA	2.2336	2.2336	2.2336	3	2.2336	2.2336	NA	2.2336
1088	71105	VW0385	121837	2010	1269	4	7	25	W9A10COLE	3629	48	57	2	4	IRR	1.922	g/100g	27/10/10 Lucerne	LAST	W9A10COLE_IRR	18.5	21.5	1.570754717	-1.811320755	COLE	4	1.922	1.922	1.922	NA	1.922	4	1.922	1.922	1.922	NA	1.922	1.922	5	1.922	1.922	1.922	1.922	NA	4	1.922	1.922	1.922	NA
1089	71106	WW19513	123484	2010	1860	4	7	26	W9A10YANA	1324	16	4	1	1	IRR	1.8369	g/100g	23/10/10 Lucerne	LAST	W9A10YANA_IRR	-40.5	-7	1.570754717	-1.811320755	YANA	3	1.8369	1.8369	NA	1.8369	1.8369	1	NA	1.8369	1.8369	1.8369	1.8369	1.8369	2	1.8369	NA	1.8369	1.8369	1.8369	4	1.8369	1.8369	1.8369	NA
1090	71107	B1272T	122039	2010	1345	4	7	27	W9A10COLE	3831	51	31	2	4	IRR	2.1448	g/100g	27/10/10 Lucerne	LAST	W9A10COLE_IRR	-7.5	24.5	1.570754717	-1.811320755	COLE	4	2.1448	2.1448	2.1448	NA	2.1448	5	2.1448	2.1448	2.1448	2.1448	NA	2.1448	1	NA	2.1448	2.1448	2.1448	2.1448	1	NA	2.1448	2.1448	2.1448
1091	71108	WW21162	124318	2010	2156	4	7	28	W9A10YANA	2158	25	46	2	3	RFD	1.9466	g/100g	30/10/10 Lucerne	LAST	W9A10YANA_RFD	1.5	2	1.570754717	-1.811320755	YANA	4	1.9466	1.9466	1.9466	NA	1.9466	1	NA	1.9466	1.9466	1.9466	1.9466	1.9466	3	1.9466	1.9466	NA	1.9466	1.9466	2	1.9466	NA	1.9466	1.9466
1092	71109	LPB04_2386_1302	122224	2010	1410	4	7	29	W9A10YANA	64	1	64	2	3	RFD	2.0677	g/100g	30/10/10 Lucerne	LAST	W9A10YANA_RFD	19.5	-22	1.570754717	-1.811320755	YANA	3	2.0677	2.0677	NA	2.0677	2.0677	1	NA	2.0677	2.0677	2.0677	2.0677	2.0677	3	2.0677	2.0677	NA	2.0677	2.0677	1	NA	2.0677	2.0677	2.0677
1093	71110	LPB04_2238	123463	2010	1855	4	7	30	W9A10YANA	1303	15	71	2	4	IRR	2.4679	g/100g	30/10/10 Lucerne	LAST	W9A10YANA_IRR	26.5	-8	1.570754717	-1.811320755	YANA	2	2.4679	NA	2.4679	2.4679	2.4679	4	2.4679	2.4679	2.4679	NA	2.4679	2.4679	1	NA	2.4679	2.4679	2.4679	2.4679	5	2.4679	2.4679	2.4679	2.4679
1094	71111	WW20256	125964	2010	2723	4	8	1	W9A10YANA	3804	44	20	1	1	IRR	2.4285	g/100g	23/10/10 Lucerne	LAST	W9A10YANA_IRR	-24.5	21	2.570754717	-1.811320755	YANA	2	2.4285	NA	2.4285	2.4285	2.4285	5	2.4285	2.4285	2.4285	2.4285	NA	2.4285	2	2.4285	NA	2.4285	2.4285	2.4285	1	NA	2.4285	2.4285	2.4285
1095	71112	WW18791	123954	2010	2024	4	8	2	W9A10YANA	1794	21	34	1	2	RFD	1.9829	g/100g	23/10/10 Hurricane	LAST	W9A10YANA_RFD	-10.5	-2	2.570754717	-1.811320755	YANA	5	1.9829	1.9829	1.9829	1.9829	NA	1	NA	1.9829	1.9829	1.9829	1.9829	1.9829	4	1.9829	1.9829	1.9829	NA	1.9829	1	NA	1.9829	1.9829	1.9829
1096	71113	HRZ06_2178	125079	2010	2410	4	8	3	W9A10YANA	2919	34	15	1	1	IRR	2.5104	g/100g	23/10/10 Lucerne	LAST	W9A10YANA_IRR	-29.5	11	2.570754717	-1.811320755	YANA	3	2.5104	2.5104	NA	2.5104	2.5104	1	NA	2.5104	2.5104	2.5104	2.5104	2.5104	3	2.5104	2.5104	NA	2.5104	2.5104	5	2.5104	2.5104	2.5104	2.5104
1097	71114	RAC1502	119757	2010	552	4	8	4	W9A10COLE	1549	21	29	1	2	RFD	2.4442	g/100g	19/10/2010	LAST	W9A10COLE_RFD	-9.5	-5.5	2.570754717	-1.811320755	COLE	2	2.4442	NA	2.4442	2.4442	2.4442	2	2.4442	NA	2.4442	2.4442	2.4442	2.4442	5	2.4442	2.4442	2.4442	2.4442	NA	4	2.4442	2.4442	2.4442	NA
1098	71115	HRZ06_0319	118322	2010	30	4	8	5	W9A10COLE	114	2	38	1	1	IRR	2.2504	g/100g	19/10/2010	LAST	W9A10COLE_IRR	-0.5	-24.5	2.570754717	-1.811320755	COLE	2	2.2504	NA	2.2504	2.2504	2.2504	4	2.2504	2.2504	2.2504	NA	2.2504	2.2504	3	2.2504	2.2504	NA	2.2504	2.2504	3	2.2504	2.2504	NA	2.2504
1099	71116	VW0404	118270	2010	18	4	8	6	W9A10COLE	62	1	62	1	1	IRR	1.0442	g/100g	19/10/2010	LAST	W9A10COLE_IRR	23.5	-25.5	2.570754717	-1.811320755	COLE	4	1.0442	1.0442	1.0442	NA	1.0442	4	1.0442	1.0442	1.0442	NA	1.0442	1.0442	3	1.0442	1.0442	NA	1.0442	1.0442	1	NA	1.0442	1.0442	1.0442
1100	71117	VV2678	122724	2010	1588	4	8	7	W9A10YANA	564	7	36	1	2	RFD	2.003	g/100g	23/10/10 Lucerne	LAST	W9A10YANA_RFD	-8.5	-16	2.570754717	-1.811320755	YANA	1	NA	2.003	2.003	2.003	2.003	2	2.003	NA	2.003	2.003	2.003	2.003	3	2.003	2.003	NA	2.003	2.003	1	NA	2.003	2.003	2.003
1101	71118	HRZ06_0033	118777	2010	182	4	8	8	W9A10COLE	569	8	37	1	1	IRR	1.6056	g/100g	19/10/2010	LAST	W9A10COLE_IRR	-1.5	-18.5	2.570754717	-1.811320755	COLE	2	1.6056	NA	1.6056	1.6056	1.6056	3	1.6056	1.6056	NA	1.6056	1.6056	1.6056	5	1.6056	1.6056	1.6056	1.6056	NA	4	1.6056	1.6056	1.6056	NA
1102	71119	WW16612	120283	2010	723	4	8	9	W9A10COLE	2075	28	23	2	3	RFD	2.3029	g/100g	27/10/10 Lucerne	LAST	W9A10COLE_RFD	-15.5	1.5	2.570754717	-1.811320755	COLE	2	2.3029	NA	2.3029	2.3029	2.3029	3	2.3029	2.3029	NA	2.3029	2.3029	2.3029	2	2.3029	NA	2.3029	2.3029	2.3029	3	2.3029	2.3029	NA	2.3029
1103	71120	LPB04_2386_1302	119931	2010	610	4	8	10	W9A10COLE	1723	23	51	1	2	RFD	2.8758	g/100g	19/10/2010	LAST	W9A10COLE_RFD	12.5	-3.5	2.570754717	-1.811320755	COLE	3	2.8758	2.8758	NA	2.8758	2.8758	1	NA	2.8758	2.8758	2.8758	2.8758	2.8758	3	2.8758	2.8758	NA	2.8758	2.8758	1	NA	2.8758	2.8758	2.8758
1104	71121	LPB04_2351	119269	2010	389	4	8	11	W9A10COLE	1061	14	73	1	2	RFD	1.6169	g/100g	12/10/2010	LAST	W9A10COLE_RFD	34.5	-12.5	2.570754717	-1.811320755	COLE	4	1.6169	1.6169	1.6169	NA	1.6169	2	1.6169	NA	1.6169	1.6169	1.6169	1.6169	3	1.6169	1.6169	NA	1.6169	1.6169	4	1.6169	1.6169	1.6169	NA
1105	71122	R901D	119991	2010	632	4	8	12	W9A10COLE	1783	24	35	1	2	RFD	1.847	g/100g	12/10/2010	LAST	W9A10COLE_RFD	-3.5	-2.5	2.570754717	-1.811320755	COLE	1	NA	1.847	1.847	1.847	1.847	1	NA	1.847	1.847	1.847	1.847	1.847	1	NA	1.847	1.847	1.847	1.847	3	1.847	1.847	NA	1.847
1106	71123	LPB04_2386_1303	122569	2010	1530	4	8	13	W9A10YANA	409	5	57	2	3	RFD	1.9849	g/100g	30/10/10 Hurricane	LAST	W9A10YANA_RFD	12.5	-18	2.570754717	-1.811320755	YANA	4	1.9849	1.9849	1.9849	NA	1.9849	2	1.9849	NA	1.9849	1.9849	1.9849	1.9849	5	1.9849	1.9849	1.9849	1.9849	NA	1	NA	1.9849	1.9849	1.9849
1107	71124	WW18957	120299	2010	730	4	8	14	W9A10COLE	2091	28	39	2	3	RFD	1.9951	g/100g	27/10/10 Lucerne	LAST	W9A10COLE_RFD	0.5	1.5	2.570754717	-1.811320755	COLE	5	1.9951	1.9951	1.9951	1.9951	NA	4	1.9951	1.9951	1.9951	NA	1.9951	1.9951	5	1.9951	1.9951	1.9951	1.9951	NA	5	1.9951	1.9951	1.9951	1.9951
1108	71125	RAC1374	119717	2010	537	4	8	15	W9A10COLE	1509	20	65	1	2	RFD	1.7745	g/100g	19/10/2010	LAST	W9A10COLE_RFD	26.5	-6.5	2.570754717	-1.811320755	COLE	1	NA	1.7745	1.7745	1.7745	1.7745	1	NA	1.7745	1.7745	1.7745	1.7745	1.7745	5	1.7745	1.7745	1.7745	1.7745	NA	2	1.7745	NA	1.7745	1.7745
1109	71126	HRZ06_0143	120938	2010	952	4	8	16	W9A10COLE	2730	36	70	2	3	RFD	1.6081	g/100g	27/10/10 Lucerne	LAST	W9A10COLE_RFD	31.5	9.5	2.570754717	-1.811320755	COLE	2	1.6081	NA	1.6081	1.6081	1.6081	5	1.6081	1.6081	1.6081	1.6081	NA	1.6081	3	1.6081	1.6081	NA	1.6081	1.6081	2	1.6081	NA	1.6081	1.6081
1110	71127	ROSELLA	121393	2010	1111	4	8	17	W9A10COLE	3185	42	69	2	4	IRR	0.44634	g/100g	27/10/10 Lucerne	LAST	W9A10COLE_IRR	30.5	15.5	2.570754717	-1.811320755	COLE	4	0.44634	0.44634	0.44634	NA	0.44634	5	0.44634	0.44634	0.44634	0.44634	NA	0.44634	1	NA	0.44634	0.44634	0.44634	0.44634	3	0.44634	0.44634	NA	0.44634
1111	71128	WW19365	119397	2010	437	4	8	18	W9A10COLE	1189	16	49	1	2	RFD	2.2753	g/100g	12/10/2010	LAST	W9A10COLE_RFD	10.5	-10.5	2.570754717	-1.811320755	COLE	5	2.2753	2.2753	2.2753	2.2753	NA	4	2.2753	2.2753	2.2753	NA	2.2753	2.2753	1	NA	2.2753	2.2753	2.2753	2.2753	2	2.2753	NA	2.2753	2.2753
1112	71129	95757_7	123481	2010	1859	4	8	19	W9A10YANA	1321	16	1	1	1	IRR	2.3632	g/100g	23/10/10 Hurricane	LAST	W9A10YANA_IRR	-43.5	-7	2.570754717	-1.811320755	YANA	2	2.3632	NA	2.3632	2.3632	2.3632	1	NA	2.3632	2.3632	2.3632	2.3632	2.3632	5	2.3632	2.3632	2.3632	2.3632	NA	4	2.3632	2.3632	2.3632	NA
1113	71130	HRZ06_0143	123913	2010	2011	4	8	20	W9A10YANA	1753	20	81	2	4	IRR	2.0654	g/100g	30/10/10 Hurricane	LAST	W9A10YANA_IRR	36.5	-3	2.570754717	-1.811320755	YANA	2	2.0654	NA	2.0654	2.0654	2.0654	5	2.0654	2.0654	2.0654	2.0654	NA	2.0654	3	2.0654	2.0654	NA	2.0654	2.0654	2	2.0654	NA	2.0654	2.0654
1114	71131	WW19562	123382	2010	1826	4	8	21	W9A10YANA	1222	14	78	2	4	IRR	1.5847	g/100g	30/10/10 Lucerne	LAST	W9A10YANA_IRR	33.5	-9	2.570754717	-1.811320755	YANA	5	1.5847	1.5847	1.5847	1.5847	NA	5	1.5847	1.5847	1.5847	1.5847	NA	1.5847	2	1.5847	NA	1.5847	1.5847	1.5847	1	NA	1.5847	1.5847	1.5847
1115	71132	VW2705	122454	2010	1494	4	8	22	W9A10YANA	294	4	30	1	2	RFD	2.6334	g/100g	23/10/10 Lucerne	LAST	W9A10YANA_RFD	-14.5	-19	2.570754717	-1.811320755	YANA	5	2.6334	2.6334	2.6334	2.6334	NA	2	2.6334	NA	2.6334	2.6334	2.6334	2.6334	2	2.6334	NA	2.6334	2.6334	2.6334	1	NA	2.6334	2.6334	2.6334
1116	71133	SENTINEL	120880	2010	918	4	8	23	W9A10COLE	2672	36	12	2	3	RFD	1.9789	g/100g	27/10/10 Lucerne	LAST	W9A10COLE_RFD	-26.5	9.5	2.570754717	-1.811320755	COLE	3	1.9789	1.9789	NA	1.9789	1.9789	4	1.9789	1.9789	1.9789	NA	1.9789	1.9789	2	1.9789	NA	1.9789	1.9789	1.9789	3	1.9789	1.9789	NA	1.9789
1117	71134	WW14311	125040	2010	2395	4	8	24	W9A10YANA	2880	33	64	2	3	RFD	2.2692	g/100g	30/10/10 Lucerne	LAST	W9A10YANA_RFD	19.5	10	2.570754717	-1.811320755	YANA	3	2.2692	2.2692	NA	2.2692	2.2692	3	2.2692	2.2692	NA	2.2692	2.2692	2.2692	4	2.2692	2.2692	2.2692	NA	2.2692	3	2.2692	2.2692	NA	2.2692
1118	71135	VW0373	125824	2010	2671	4	8	25	W9A10YANA	3664	42	56	2	3	RFD	2.46	g/100g	30/10/10 Lucerne	LAST	W9A10YANA_RFD	11.5	19	2.570754717	-1.811320755	YANA	4	2.46	2.46	2.46	NA	2.46	1	NA	2.46	2.46	2.46	2.46	2.46	2	2.46	NA	2.46	2.46	2.46	2	2.46	NA	2.46	2.46
1119	71136	WW20406	118371	2010	49	4	8	26	W9A10COLE	163	3	11	1	1	IRR	1.3529	g/100g	23/10/10 Lucerne	LAST	W9A10COLE_IRR	-27.5	-23.5	2.570754717	-1.811320755	COLE	3	1.3529	1.3529	NA	1.3529	1.3529	2	1.3529	NA	1.3529	1.3529	1.3529	1.3529	5	1.3529	1.3529	1.3529	1.3529	NA	5	1.3529	1.3529	1.3529	1.3529
1120	71137	9329_13	124159	2010	2100	4	8	27	W9A10YANA	1999	23	63	2	3	RFD	2.0257	g/100g	30/10/10 Lucerne	LAST	W9A10YANA_RFD	18.5	0	2.570754717	-1.811320755	YANA	5	2.0257	2.0257	2.0257	2.0257	NA	1	NA	2.0257	2.0257	2.0257	2.0257	2.0257	2	2.0257	NA	2.0257	2.0257	2.0257	4	2.0257	2.0257	2.0257	NA
1121	71138	LPB04_2238	119003	2010	260	4	8	28	W9A10COLE	795	11	35	1	1	IRR	1.7907	g/100g	19/10/2010	LAST	W9A10COLE_IRR	-3.5	-15.5	2.570754717	-1.811320755	COLE	2	1.7907	NA	1.7907	1.7907	1.7907	4	1.7907	1.7907	1.7907	NA	1.7907	1.7907	1	NA	1.7907	1.7907	1.7907	1.7907	5	1.7907	1.7907	1.7907	1.7907
1122	71139	WYLAH	121007	2010	988	4	8	29	W9A10COLE	2799	37	63	2	3	RFD	0.18898	g/100g	27/10/10 Lucerne	LAST	W9A10COLE_RFD	24.5	10.5	2.570754717	-1.811320755	COLE	5	0.18898	0.18898	0.18898	0.18898	NA	4	0.18898	0.18898	0.18898	NA	0.18898	0.18898	4	0.18898	0.18898	0.18898	NA	0.18898	1	NA	0.18898	0.18898	0.18898
1123	71140	VW0823	120696	2010	860	4	8	30	W9A10COLE	2488	33	56	2	3	RFD	1.9276	g/100g	27/10/10 Lucerne	LAST	W9A10COLE_RFD	17.5	6.5	2.570754717	-1.811320755	COLE	3	1.9276	1.9276	NA	1.9276	1.9276	3	1.9276	1.9276	NA	1.9276	1.9276	1.9276	4	1.9276	1.9276	1.9276	NA	1.9276	4	1.9276	1.9276	1.9276	NA
1124	71141	HRZ04_0420	120192	2010	697	4	9	1	W9A10COLE	1984	27	8	2	3	RFD	2.1659	g/100g	27/10/10 Lucerne	LAST	W9A10COLE_RFD	-30.5	0.5	3.570754717	-1.811320755	COLE	2	2.1659	NA	2.1659	2.1659	2.1659	1	NA	2.1659	2.1659	2.1659	2.1659	2.1659	2	2.1659	NA	2.1659	2.1659	2.1659	5	2.1659	2.1659	2.1659	2.1659
1125	71142	SUNVALE	120872	2010	913	4	9	2	W9A10COLE	2664	36	4	2	3	RFD	1.0694	g/100g	27/10/10 Lucerne	LAST	W9A10COLE_RFD	-34.5	9.5	3.570754717	-1.811320755	COLE	2	1.0694	NA	1.0694	1.0694	1.0694	1	NA	1.0694	1.0694	1.0694	1.0694	1.0694	5	1.0694	1.0694	1.0694	1.0694	NA	3	1.0694	1.0694	NA	1.0694
1126	71143	VW0398	122465	2010	1498	4	9	3	W9A10YANA	305	4	41	1	2	RFD	2.0012	g/100g	23/10/10 Hurricane	LAST	W9A10YANA_RFD	-3.5	-19	3.570754717	-1.811320755	YANA	4	2.0012	2.0012	2.0012	NA	2.0012	4	2.0012	2.0012	2.0012	NA	2.0012	2.0012	1	NA	2.0012	2.0012	2.0012	2.0012	4	2.0012	2.0012	2.0012	NA
1127	71144	VW2782	122166	2010	1390	4	9	4	W9A10YANA	6	1	6	1	1	IRR	2.2649	g/100g	23/10/10 Lucerne	LAST	W9A10YANA_IRR	-38.5	-22	3.570754717	-1.811320755	YANA	1	NA	2.2649	2.2649	2.2649	2.2649	3	2.2649	2.2649	NA	2.2649	2.2649	2.2649	4	2.2649	2.2649	2.2649	NA	2.2649	3	2.2649	2.2649	NA	2.2649
1128	71145	VW3170	119704	2010	531	4	9	5	W9A10COLE	1496	20	52	1	2	RFD	1.1453	g/100g	12/10/2010	LAST	W9A10COLE_RFD	13.5	-6.5	3.570754717	-1.811320755	COLE	5	1.1453	1.1453	1.1453	1.1453	NA	1	NA	1.1453	1.1453	1.1453	1.1453	1.1453	3	1.1453	1.1453	NA	1.1453	1.1453	2	1.1453	NA	1.1453	1.1453
1129	71146	VW1152	125242	2010	2469	4	9	6	W9A10YANA	3082	36	2	1	1	IRR	1.7855	g/100g	23/10/10 Lucerne	LAST	W9A10YANA_IRR	-42.5	13	3.570754717	-1.811320755	YANA	1	NA	1.7855	1.7855	1.7855	1.7855	4	1.7855	1.7855	1.7855	NA	1.7855	1.7855	2	1.7855	NA	1.7855	1.7855	1.7855	5	1.7855	1.7855	1.7855	1.7855
1130	71147	WW19490	121001	2010	985	4	9	7	W9A10COLE	2793	37	57	2	3	RFD	1.9269	g/100g	27/10/10 Lucerne	LAST	W9A10COLE_RFD	18.5	10.5	3.570754717	-1.811320755	COLE	3	1.9269	1.9269	NA	1.9269	1.9269	5	1.9269	1.9269	1.9269	1.9269	NA	1.9269	5	1.9269	1.9269	1.9269	1.9269	NA	4	1.9269	1.9269	1.9269	NA
1131	71148	JANZ	119195	2010	347	4	9	8	W9A10COLE	987	13	75	1	1	IRR	1.3075	g/100g	12/10/2010	LAST	W9A10COLE_IRR	36.5	-13.5	3.570754717	-1.811320755	COLE	3	1.3075	1.3075	NA	1.3075	1.3075	3	1.3075	1.3075	NA	1.3075	1.3075	1.3075	5	1.3075	1.3075	1.3075	1.3075	NA	1	NA	1.3075	1.3075	1.3075
1132	71149	CHARA	119163	2010	334	4	9	9	W9A10COLE	955	13	43	1	1	IRR	2.0173	g/100g	12/10/2010	LAST	W9A10COLE_IRR	4.5	-13.5	3.570754717	-1.811320755	COLE	5	2.0173	2.0173	2.0173	2.0173	NA	4	2.0173	2.0173	2.0173	NA	2.0173	2.0173	5	2.0173	2.0173	2.0173	2.0173	NA	5	2.0173	2.0173	2.0173	2.0173
1133	71150	WW21573	123391	2010	1828	4	9	10	W9A10YANA	1231	14	87	2	4	IRR	2.6861	g/100g	30/10/10 Hurricane	LAST	W9A10YANA_IRR	42.5	-9	3.570754717	-1.811320755	YANA	1	NA	2.6861	2.6861	2.6861	2.6861	1	NA	2.6861	2.6861	2.6861	2.6861	2.6861	5	2.6861	2.6861	2.6861	2.6861	NA	5	2.6861	2.6861	2.6861	2.6861
1134	71151	WW20291	121820	2010	1262	4	9	11	W9A10COLE	3612	48	40	2	4	IRR	1.1209	g/100g	27/10/10 Lucerne	LAST	W9A10COLE_IRR	1.5	21.5	3.570754717	-1.811320755	COLE	4	1.1209	1.1209	1.1209	NA	1.1209	3	1.1209	1.1209	NA	1.1209	1.1209	1.1209	2	1.1209	NA	1.1209	1.1209	1.1209	4	1.1209	1.1209	1.1209	NA
1135	71152	VW2067	120341	2010	741	4	9	12	W9A10COLE	2133	29	5	2	3	RFD	2.2597	g/100g	27/10/10 Lucerne	LAST	W9A10COLE_RFD	-33.5	2.5	3.570754717	-1.811320755	COLE	5	2.2597	2.2597	2.2597	2.2597	NA	1	NA	2.2597	2.2597	2.2597	2.2597	2.2597	1	NA	2.2597	2.2597	2.2597	2.2597	4	2.2597	2.2597	2.2597	NA
1136	71153	WW19987	121923	2010	1301	4	9	13	W9A10COLE	3715	49	67	2	4	IRR	2.3495	g/100g	27/10/10 Lucerne	LAST	W9A10COLE_IRR	28.5	22.5	3.570754717	-1.811320755	COLE	1	NA	2.3495	2.3495	2.3495	2.3495	1	NA	2.3495	2.3495	2.3495	2.3495	2.3495	5	2.3495	2.3495	2.3495	2.3495	NA	1	NA	2.3495	2.3495	2.3495
1137	71154	WEEBILL1	122048	2010	1347	4	9	14	W9A10COLE	3840	51	40	2	4	IRR	1.5898	g/100g	27/10/10 Lucerne	LAST	W9A10COLE_IRR	1.5	24.5	3.570754717	-1.811320755	COLE	2	1.5898	NA	1.5898	1.5898	1.5898	3	1.5898	1.5898	NA	1.5898	1.5898	1.5898	2	1.5898	NA	1.5898	1.5898	1.5898	5	1.5898	1.5898	1.5898	1.5898
1138	71155	WYUNA	123324	2010	1807	4	9	15	W9A10YANA	1164	14	20	1	1	IRR	1.1801	g/100g	23/10/10 Hurricane	LAST	W9A10YANA_IRR	-24.5	-9	3.570754717	-1.811320755	YANA	2	1.1801	NA	1.1801	1.1801	1.1801	4	1.1801	1.1801	1.1801	NA	1.1801	1.1801	4	1.1801	1.1801	1.1801	NA	1.1801	4	1.1801	1.1801	1.1801	NA
1139	71156	VW1498	122515	2010	1514	4	9	16	W9A10YANA	355	5	3	1	1	IRR	2.2218	g/100g	23/10/10 Lucerne	LAST	W9A10YANA_IRR	-41.5	-18	3.570754717	-1.811320755	YANA	3	2.2218	2.2218	NA	2.2218	2.2218	1	NA	2.2218	2.2218	2.2218	2.2218	2.2218	5	2.2218	2.2218	2.2218	2.2218	NA	5	2.2218	2.2218	2.2218	2.2218
1140	71157	R901D	121225	2010	1053	4	9	17	W9A10COLE	3017	40	53	2	4	IRR	1.9354	g/100g	27/10/10 Lucerne	LAST	W9A10COLE_IRR	14.5	13.5	3.570754717	-1.811320755	COLE	1	NA	1.9354	1.9354	1.9354	1.9354	1	NA	1.9354	1.9354	1.9354	1.9354	1.9354	1	NA	1.9354	1.9354	1.9354	1.9354	3	1.9354	1.9354	NA	1.9354
1141	71158	PAVON_DWARF	120403	2010	754	4	9	18	W9A10COLE	2195	29	67	2	3	RFD	2.4887	g/100g	27/10/10 Lucerne	LAST	W9A10COLE_RFD	28.5	2.5	3.570754717	-1.811320755	COLE	3	2.4887	2.4887	NA	2.4887	2.4887	2	2.4887	NA	2.4887	2.4887	2.4887	2.4887	1	NA	2.4887	2.4887	2.4887	2.4887	5	2.4887	2.4887	2.4887	2.4887
1142	71159	VW0404	122721	2010	1587	4	9	19	W9A10YANA	561	7	33	1	2	RFD	1.7298	g/100g	23/10/10 Hurricane	LAST	W9A10YANA_RFD	-11.5	-16	3.570754717	-1.811320755	YANA	4	1.7298	1.7298	1.7298	NA	1.7298	4	1.7298	1.7298	1.7298	NA	1.7298	1.7298	3	1.7298	1.7298	NA	1.7298	1.7298	1	NA	1.7298	1.7298	1.7298
1143	71160	LPB04_2386_1303	125429	2010	2537	4	9	20	W9A10YANA	3269	38	13	1	1	IRR	1.7213	g/100g	23/10/10 Lucerne	LAST	W9A10YANA_IRR	-31.5	15	3.570754717	-1.811320755	YANA	4	1.7213	1.7213	1.7213	NA	1.7213	2	1.7213	NA	1.7213	1.7213	1.7213	1.7213	5	1.7213	1.7213	1.7213	1.7213	NA	1	NA	1.7213	1.7213	1.7213
1144	71161	VW0385	125216	2010	2459	4	9	21	W9A10YANA	3056	35	64	2	3	RFD	1.9881	g/100g	30/10/10 Lucerne	LAST	W9A10YANA_RFD	19.5	12	3.570754717	-1.811320755	YANA	4	1.9881	1.9881	1.9881	NA	1.9881	4	1.9881	1.9881	1.9881	NA	1.9881	1.9881	5	1.9881	1.9881	1.9881	1.9881	NA	4	1.9881	1.9881	1.9881	NA
1145	71162	VW0318	125028	2010	2392	4	9	22	W9A10YANA	2868	33	52	2	3	RFD	1.5287	g/100g	30/10/10 Lucerne	LAST	W9A10YANA_RFD	7.5	10	3.570754717	-1.811320755	YANA	5	1.5287	1.5287	1.5287	1.5287	NA	3	1.5287	1.5287	NA	1.5287	1.5287	1.5287	1	NA	1.5287	1.5287	1.5287	1.5287	2	1.5287	NA	1.5287	1.5287
1146	71163	VW1286	124097	2010	2082	4	9	23	W9A10YANA	1937	23	1	1	1	IRR	1.8837	g/100g	23/10/10 Lucerne	LAST	W9A10YANA_IRR	-43.5	0	3.570754717	-1.811320755	YANA	3	1.8837	1.8837	NA	1.8837	1.8837	5	1.8837	1.8837	1.8837	1.8837	NA	1.8837	3	1.8837	1.8837	NA	1.8837	1.8837	4	1.8837	1.8837	1.8837	NA
1147	71164	WW18805	119599	2010	502	4	9	24	W9A10COLE	1391	19	23	1	2	RFD	2.104	g/100g	19/10/2010	LAST	W9A10COLE_RFD	-15.5	-7.5	3.570754717	-1.811320755	COLE	3	2.104	2.104	NA	2.104	2.104	3	2.104	2.104	NA	2.104	2.104	2.104	2	2.104	NA	2.104	2.104	2.104	4	2.104	2.104	2.104	NA
1148	71165	VW1864	120072	2010	662	4	9	25	W9A10COLE	1864	25	40	1	2	RFD	1.2276	g/100g	19/10/2010	LAST	W9A10COLE_RFD	1.5	-1.5	3.570754717	-1.811320755	COLE	5	1.2276	1.2276	1.2276	1.2276	NA	1	NA	1.2276	1.2276	1.2276	1.2276	1.2276	4	1.2276	1.2276	1.2276	NA	1.2276	4	1.2276	1.2276	1.2276	NA
1149	71166	VW3595	120109	2010	673	4	9	26	W9A10COLE	1901	26	1	1	2	RFD	1.84	g/100g	19/10/2010	LAST	W9A10COLE_RFD	-37.5	-0.5	3.570754717	-1.811320755	COLE	3	1.84	1.84	NA	1.84	1.84	5	1.84	1.84	1.84	1.84	NA	1.84	4	1.84	1.84	1.84	NA	1.84	2	1.84	NA	1.84	1.84
1150	71167	LPB04_2172	120669	2010	847	4	9	27	W9A10COLE	2461	33	29	2	3	RFD	2.6399	g/100g	27/10/10 Lucerne	LAST	W9A10COLE_RFD	-9.5	6.5	3.570754717	-1.811320755	COLE	1	NA	2.6399	2.6399	2.6399	2.6399	4	2.6399	2.6399	2.6399	NA	2.6399	2.6399	2	2.6399	NA	2.6399	2.6399	2.6399	1	NA	2.6399	2.6399	2.6399
1151	71168	VW1498	123736	2010	1951	4	9	28	W9A10YANA	1576	18	80	2	4	IRR	1.1259	g/100g	30/10/10 Lucerne	LAST	W9A10YANA_IRR	35.5	-5	3.570754717	-1.811320755	YANA	3	1.1259	1.1259	NA	1.1259	1.1259	1	NA	1.1259	1.1259	1.1259	1.1259	1.1259	5	1.1259	1.1259	1.1259	1.1259	NA	5	1.1259	1.1259	1.1259	1.1259
1152	71169	VW2708	125121	2010	2428	4	9	29	W9A10YANA	2961	34	57	2	3	RFD	2.6873	g/100g	30/10/10 Lucerne	LAST	W9A10YANA_RFD	12.5	11	3.570754717	-1.811320755	YANA	3	2.6873	2.6873	NA	2.6873	2.6873	1	NA	2.6873	2.6873	2.6873	2.6873	2.6873	5	2.6873	2.6873	2.6873	2.6873	NA	4	2.6873	2.6873	2.6873	NA
1153	71170	HRZ04_0157	120842	2010	905	4	9	30	W9A10COLE	2634	35	50	2	3	RFD	2.031	g/100g	27/10/10 Lucerne	LAST	W9A10COLE_RFD	11.5	8.5	3.570754717	-1.811320755	COLE	2	2.031	NA	2.031	2.031	2.031	5	2.031	2.031	2.031	2.031	NA	2.031	2	2.031	NA	2.031	2.031	2.031	3	2.031	2.031	NA	2.031
1154	71171	CATALINA	123494	2010	1864	4	10	1	W9A10YANA	1334	16	14	1	1	IRR	2.2383	g/100g	23/10/10 Lucerne	LAST	W9A10YANA_IRR	-30.5	-7	4.570754717	-1.811320755	YANA	4	2.2383	2.2383	2.2383	NA	2.2383	4	2.2383	2.2383	2.2383	NA	2.2383	2.2383	4	2.2383	2.2383	2.2383	NA	2.2383	4	2.2383	2.2383	2.2383	NA
1155	71172	VT2474	122612	2010	1551	4	10	2	W9A10YANA	452	6	12	1	1	IRR	2.009	g/100g	23/10/10 Hurricane	LAST	W9A10YANA_IRR	-32.5	-17	4.570754717	-1.811320755	YANA	5	2.009	2.009	2.009	2.009	NA	5	2.009	2.009	2.009	2.009	NA	2.009	3	2.009	2.009	NA	2.009	2.009	5	2.009	2.009	2.009	2.009
1156	71173	WW19562	122285	2010	1437	4	10	3	W9A10YANA	125	2	37	1	2	RFD	2.3121	g/100g	23/10/10 Hurricane	LAST	W9A10YANA_RFD	-7.5	-21	4.570754717	-1.811320755	YANA	5	2.3121	2.3121	2.3121	2.3121	NA	5	2.3121	2.3121	2.3121	2.3121	NA	2.3121	2	2.3121	NA	2.3121	2.3121	2.3121	1	NA	2.3121	2.3121	2.3121
1157	71174	HRZ04_0206	122680	2010	1573	4	10	4	W9A10YANA	520	6	80	2	4	IRR	2.1121	g/100g	30/10/10 Hurricane	LAST	W9A10YANA_IRR	35.5	-17	4.570754717	-1.811320755	YANA	1	NA	2.1121	2.1121	2.1121	2.1121	1	NA	2.1121	2.1121	2.1121	2.1121	2.1121	4	2.1121	2.1121	2.1121	NA	2.1121	4	2.1121	2.1121	2.1121	NA
1158	71175	WW13710	123298	2010	1797	4	10	5	W9A10YANA	1138	13	82	2	4	IRR	1.263	g/100g	30/10/10 Lucerne	LAST	W9A10YANA_IRR	37.5	-10	4.570754717	-1.811320755	YANA	5	1.263	1.263	1.263	1.263	NA	4	1.263	1.263	1.263	NA	1.263	1.263	4	1.263	1.263	1.263	NA	1.263	1	NA	1.263	1.263	1.263
1159	71176	WW20159	122911	2010	1655	4	10	6	W9A10YANA	751	9	47	2	3	RFD	1.6005	g/100g	30/10/10 Lucerne	LAST	W9A10YANA_RFD	2.5	-14	4.570754717	-1.811320755	YANA	4	1.6005	1.6005	1.6005	NA	1.6005	1	NA	1.6005	1.6005	1.6005	1.6005	1.6005	1	NA	1.6005	1.6005	1.6005	1.6005	3	1.6005	1.6005	NA	1.6005
1160	71177	SUNVALE	123262	2010	1785	4	10	7	W9A10YANA	1102	13	46	2	3	RFD	1.5171	g/100g	30/10/10 Lucerne	LAST	W9A10YANA_RFD	1.5	-10	4.570754717	-1.811320755	YANA	2	1.5171	NA	1.5171	1.5171	1.5171	1	NA	1.5171	1.5171	1.5171	1.5171	1.5171	5	1.5171	1.5171	1.5171	1.5171	NA	3	1.5171	1.5171	NA	1.5171
1161	71178	VW1152	119246	2010	374	4	10	8	W9A10COLE	1038	14	50	1	2	RFD	2.4699	g/100g	12/10/2010	LAST	W9A10COLE_RFD	11.5	-12.5	4.570754717	-1.811320755	COLE	1	NA	2.4699	2.4699	2.4699	2.4699	4	2.4699	2.4699	2.4699	NA	2.4699	2.4699	2	2.4699	NA	2.4699	2.4699	2.4699	5	2.4699	2.4699	2.4699	2.4699
1162	71179	HRZ06_0141	120999	2010	983	4	10	9	W9A10COLE	2791	37	55	2	3	RFD	2.345	g/100g	27/10/10 Lucerne	LAST	W9A10COLE_RFD	16.5	10.5	4.570754717	-1.811320755	COLE	3	2.345	2.345	NA	2.345	2.345	3	2.345	2.345	NA	2.345	2.345	2.345	4	2.345	2.345	2.345	NA	2.345	1	NA	2.345	2.345	2.345
1163	71180	HRZ06_0491	123538	2010	1886	4	10	10	W9A10YANA	1378	16	58	2	3	RFD	2.1076	g/100g	30/10/10 Lucerne	LAST	W9A10YANA_RFD	13.5	-7	4.570754717	-1.811320755	YANA	3	2.1076	2.1076	NA	2.1076	2.1076	4	2.1076	2.1076	2.1076	NA	2.1076	2.1076	2	2.1076	NA	2.1076	2.1076	2.1076	3	2.1076	2.1076	NA	2.1076
1164	71181	EGA_EAGLEHAWK	119272	2010	391	4	10	11	W9A10COLE	1064	14	76	1	2	RFD	1.1731	g/100g	12/10/2010	LAST	W9A10COLE_RFD	37.5	-12.5	4.570754717	-1.811320755	COLE	4	1.1731	1.1731	1.1731	NA	1.1731	5	1.1731	1.1731	1.1731	1.1731	NA	1.1731	5	1.1731	1.1731	1.1731	1.1731	NA	3	1.1731	1.1731	NA	1.1731
1165	71182	VW3744	125200	2010	2452	4	10	12	W9A10YANA	3040	35	48	2	3	RFD	2.1054	g/100g	27/10/10 Lucerne	LAST	W9A10YANA_RFD	3.5	12	4.570754717	-1.811320755	YANA	1	NA	2.1054	2.1054	2.1054	2.1054	4	2.1054	2.1054	2.1054	NA	2.1054	2.1054	3	2.1054	2.1054	NA	2.1054	2.1054	4	2.1054	2.1054	2.1054	NA
1166	71183	LPB04_2238	122815	2010	1616	4	10	13	W9A10YANA	655	8	39	1	2	RFD	1.8998	g/100g	23/10/10 Hurricane	LAST	W9A10YANA_RFD	-5.5	-15	4.570754717	-1.811320755	YANA	2	1.8998	NA	1.8998	1.8998	1.8998	4	1.8998	1.8998	1.8998	NA	1.8998	1.8998	1	NA	1.8998	1.8998	1.8998	1.8998	5	1.8998	1.8998	1.8998	1.8998
1167	71184	HRZ04_0511	119590	2010	499	4	10	14	W9A10COLE	1382	19	14	1	2	RFD	2.1755	g/100g	19/10/2010	LAST	W9A10COLE_RFD	-24.5	-7.5	4.570754717	-1.811320755	COLE	3	2.1755	2.1755	NA	2.1755	2.1755	1	NA	2.1755	2.1755	2.1755	2.1755	2.1755	1	NA	2.1755	2.1755	2.1755	2.1755	5	2.1755	2.1755	2.1755	2.1755
1168	71185	AUS33697	125671	2010	2619	4	10	15	W9A10YANA	3511	40	79	2	4	IRR	1.3707	g/100g	30/10/10 Lucerne	LAST	W9A10YANA_IRR	34.5	17	4.570754717	-1.811320755	YANA	3	1.3707	1.3707	NA	1.3707	1.3707	2	1.3707	NA	1.3707	1.3707	1.3707	1.3707	5	1.3707	1.3707	1.3707	1.3707	NA	1	NA	1.3707	1.3707	1.3707
1169	71186	VT2474	124315	2010	2155	4	10	16	W9A10YANA	2155	25	43	1	2	RFD	2.2816	g/100g	23/10/10 Hurricane	LAST	W9A10YANA_RFD	-1.5	2	4.570754717	-1.811320755	YANA	5	2.2816	2.2816	2.2816	2.2816	NA	5	2.2816	2.2816	2.2816	2.2816	NA	2.2816	3	2.2816	2.2816	NA	2.2816	2.2816	5	2.2816	2.2816	2.2816	2.2816
1170	71187	WW20689	124839	2010	2327	4	10	17	W9A10YANA	2679	31	39	1	2	RFD	2.2299	g/100g	23/10/10 Hurricane	LAST	W9A10YANA_RFD	-5.5	8	4.570754717	-1.811320755	YANA	1	NA	2.2299	2.2299	2.2299	2.2299	1	NA	2.2299	2.2299	2.2299	2.2299	2.2299	4	2.2299	2.2299	2.2299	NA	2.2299	1	NA	2.2299	2.2299	2.2299
1171	71188	LPB04_2264	121578	2010	1181	4	10	18	W9A10COLE	3370	45	26	2	4	IRR	1.5296	g/100g	27/10/10 Lucerne	LAST	W9A10COLE_IRR	-12.5	18.5	4.570754717	-1.811320755	COLE	3	1.5296	1.5296	NA	1.5296	1.5296	4	1.5296	1.5296	1.5296	NA	1.5296	1.5296	1	NA	1.5296	1.5296	1.5296	1.5296	1	NA	1.5296	1.5296	1.5296
1172	71189	HRZ04_0157	118375	2010	50	4	10	19	W9A10COLE	167	3	15	1	1	IRR	1.9399	g/100g	19/10/2010	LAST	W9A10COLE_IRR	-23.5	-23.5	4.570754717	-1.811320755	COLE	2	1.9399	NA	1.9399	1.9399	1.9399	5	1.9399	1.9399	1.9399	1.9399	NA	1.9399	2	1.9399	NA	1.9399	1.9399	1.9399	3	1.9399	1.9399	NA	1.9399
1173	71190	HRZ06_0145	119047	2010	273	4	10	20	W9A10COLE	839	12	3	1	1	IRR	1.8868	g/100g	19/10/2010	LAST	W9A10COLE_IRR	-35.5	-14.5	4.570754717	-1.811320755	COLE	3	1.8868	1.8868	NA	1.8868	1.8868	3	1.8868	1.8868	NA	1.8868	1.8868	1.8868	2	1.8868	NA	1.8868	1.8868	1.8868	5	1.8868	1.8868	1.8868	1.8868
1174	71191	HRZ06_0319	120719	2010	868	4	10	21	W9A10COLE	2511	34	3	2	3	RFD	1.8754	g/100g	27/10/10 Lucerne	LAST	W9A10COLE_RFD	-35.5	7.5	4.570754717	-1.811320755	COLE	2	1.8754	NA	1.8754	1.8754	1.8754	4	1.8754	1.8754	1.8754	NA	1.8754	1.8754	3	1.8754	1.8754	NA	1.8754	1.8754	3	1.8754	1.8754	NA	1.8754
1175	71192	WW19492	124074	2010	2072	4	10	22	W9A10YANA	1914	22	66	2	3	RFD	2.249	g/100g	30/10/10 Hurricane	LAST	W9A10YANA_RFD	21.5	-1	4.570754717	-1.811320755	YANA	2	2.249	NA	2.249	2.249	2.249	1	NA	2.249	2.249	2.249	2.249	2.249	5	2.249	2.249	2.249	2.249	NA	3	2.249	2.249	NA	2.249
1176	71193	H45	121345	2010	1086	4	10	23	W9A10COLE	3137	42	21	2	4	IRR	2.0121	g/100g	27/10/10 Lucerne	LAST	W9A10COLE_IRR	-17.5	15.5	4.570754717	-1.811320755	COLE	1	NA	2.0121	2.0121	2.0121	2.0121	3	2.0121	2.0121	NA	2.0121	2.0121	2.0121	5	2.0121	2.0121	2.0121	2.0121	NA	5	2.0121	2.0121	2.0121	2.0121
1177	71194	DAKOTA	124708	2010	2279	4	10	24	W9A10YANA	2548	29	84	2	4	IRR	1.3167	g/100g	30/10/10 Lucerne	LAST	W9A10YANA_IRR	39.5	6	4.570754717	-1.811320755	YANA	2	1.3167	NA	1.3167	1.3167	1.3167	5	1.3167	1.3167	1.3167	1.3167	NA	1.3167	1	NA	1.3167	1.3167	1.3167	1.3167	1	NA	1.3167	1.3167	1.3167
1178	71195	ZEBU	121463	2010	1146	4	10	25	W9A10COLE	3255	43	63	2	4	IRR	1.7144	g/100g	27/10/10 Hurricane	LAST	W9A10COLE_IRR	24.5	16.5	4.570754717	-1.811320755	COLE	3	1.7144	1.7144	NA	1.7144	1.7144	3	1.7144	1.7144	NA	1.7144	1.7144	1.7144	2	1.7144	NA	1.7144	1.7144	1.7144	4	1.7144	1.7144	1.7144	NA
1179	71196	WW19891	119132	2010	318	4	10	26	W9A10COLE	924	13	12	1	1	IRR	2.1353	g/100g	19/10/2010	LAST	W9A10COLE_IRR	-26.5	-13.5	4.570754717	-1.811320755	COLE	1	NA	2.1353	2.1353	2.1353	2.1353	4	2.1353	2.1353	2.1353	NA	2.1353	2.1353	1	NA	2.1353	2.1353	2.1353	2.1353	3	2.1353	2.1353	NA	2.1353
1180	71197	WW19987	118699	2010	154	4	10	27	W9A10COLE	491	7	35	1	1	IRR	1.575	g/100g	12/10/2010	LAST	W9A10COLE_IRR	-3.5	-19.5	4.570754717	-1.811320755	COLE	1	NA	1.575	1.575	1.575	1.575	1	NA	1.575	1.575	1.575	1.575	1.575	5	1.575	1.575	1.575	1.575	NA	1	NA	1.575	1.575	1.575
1181	71198	WW20383	119088	2010	297	4	10	28	W9A10COLE	880	12	44	1	1	IRR	1.4573	g/100g	12/10/2010	LAST	W9A10COLE_IRR	5.5	-14.5	4.570754717	-1.811320755	COLE	4	1.4573	1.4573	1.4573	NA	1.4573	1	NA	1.4573	1.4573	1.4573	1.4573	1.4573	5	1.4573	1.4573	1.4573	1.4573	NA	1	NA	1.4573	1.4573	1.4573
1182	71199	HRZ05_0101	122139	2010	1381	4	10	29	W9A10COLE	3931	52	55	2	4	IRR	1.7069	g/100g	27/10/10 Lucerne	LAST	W9A10COLE_IRR	16.5	25.5	4.570754717	-1.811320755	COLE	3	1.7069	1.7069	NA	1.7069	1.7069	5	1.7069	1.7069	1.7069	1.7069	NA	1.7069	3	1.7069	1.7069	NA	1.7069	1.7069	2	1.7069	NA	1.7069	1.7069
1183	71200	WW19684	119863	2010	582	4	10	30	W9A10COLE	1655	22	59	1	2	RFD	1.8146	g/100g	19/10/2010	LAST	W9A10COLE_RFD	20.5	-4.5	4.570754717	-1.811320755	COLE	5	1.8146	1.8146	1.8146	1.8146	NA	2	1.8146	NA	1.8146	1.8146	1.8146	1.8146	5	1.8146	1.8146	1.8146	1.8146	NA	2	1.8146	NA	1.8146	1.8146
1184	71201	7896_254	123378	2010	1825	5	1	1	W9A10YANA	1218	14	74	2	4	IRR	2.1422	g/100g	30/10/10 Lucerne	LAST	W9A10YANA_IRR	29.5	-9	-4.429245283	-0.811320755	YANA	3	2.1422	2.1422	NA	2.1422	2.1422	2	2.1422	NA	2.1422	2.1422	2.1422	2.1422	5	2.1422	2.1422	2.1422	2.1422	NA	4	2.1422	2.1422	2.1422	NA
1185	71202	WW20484	122410	2010	1481	5	1	2	W9A10YANA	250	3	74	2	4	IRR	1.9054	g/100g	30/10/10 Hurricane	LAST	W9A10YANA_IRR	29.5	-20	-4.429245283	-0.811320755	YANA	4	1.9054	1.9054	1.9054	NA	1.9054	5	1.9054	1.9054	1.9054	1.9054	NA	1.9054	3	1.9054	1.9054	NA	1.9054	1.9054	1	NA	1.9054	1.9054	1.9054
1186	71203	WW19663	121485	2010	1156	5	1	3	W9A10COLE	3277	44	9	2	4	IRR	2.0478	g/100g	27/10/10 Lucerne	LAST	W9A10COLE_IRR	-29.5	17.5	-4.429245283	-0.811320755	COLE	1	NA	2.0478	2.0478	2.0478	2.0478	5	2.0478	2.0478	2.0478	2.0478	NA	2.0478	3	2.0478	2.0478	NA	2.0478	2.0478	2	2.0478	NA	2.0478	2.0478
1187	71204	AXE	119307	2010	407	5	1	4	W9A10COLE	1099	15	35	1	2	RFD	1.8313	g/100g	19/10/2010	LAST	W9A10COLE_RFD	-3.5	-11.5	-4.429245283	-0.811320755	COLE	2	1.8313	NA	1.8313	1.8313	1.8313	4	1.8313	1.8313	1.8313	NA	1.8313	1.8313	1	NA	1.8313	1.8313	1.8313	1.8313	5	1.8313	1.8313	1.8313	1.8313
1188	71205	BOLAC	125001	2010	2386	5	1	5	W9A10YANA	2841	33	25	1	2	RFD	1.6065	g/100g	23/10/10 Hurricane	LAST	W9A10YANA_RFD	-19.5	10	-4.429245283	-0.811320755	YANA	4	1.6065	1.6065	1.6065	NA	1.6065	5	1.6065	1.6065	1.6065	1.6065	NA	1.6065	2	1.6065	NA	1.6065	1.6065	1.6065	3	1.6065	1.6065	NA	1.6065
1189	71206	WW20484	122101	2010	1367	5	1	6	W9A10COLE	3893	52	17	2	4	IRR	1.8316	g/100g	27/10/10 Lucerne	LAST	W9A10COLE_IRR	-21.5	25.5	-4.429245283	-0.811320755	COLE	4	1.8316	1.8316	1.8316	NA	1.8316	5	1.8316	1.8316	1.8316	1.8316	NA	1.8316	3	1.8316	1.8316	NA	1.8316	1.8316	1	NA	1.8316	1.8316	1.8316
1190	71207	WAGT022	124955	2010	2367	5	1	7	W9A10YANA	2795	32	67	2	4	IRR	1.984	g/100g	30/10/10 Hurricane	LAST	W9A10YANA_IRR	22.5	9	-4.429245283	-0.811320755	YANA	3	1.984	1.984	NA	1.984	1.984	4	1.984	1.984	1.984	NA	1.984	1.984	5	1.984	1.984	1.984	1.984	NA	4	1.984	1.984	1.984	NA
1191	71208	BOLAC	122171	2010	1393	5	1	8	W9A10YANA	11	1	11	1	1	IRR	1.534	g/100g	23/10/10 Lucerne	LAST	W9A10YANA_IRR	-33.5	-22	-4.429245283	-0.811320755	YANA	4	1.534	1.534	1.534	NA	1.534	5	1.534	1.534	1.534	1.534	NA	1.534	2	1.534	NA	1.534	1.534	1.534	3	1.534	1.534	NA	1.534
1192	71209	WW19753	122243	2010	1419	5	1	9	W9A10YANA	83	1	83	2	4	IRR	2.0581	g/100g	30/10/10 Hurricane	LAST	W9A10YANA_IRR	38.5	-22	-4.429245283	-0.811320755	YANA	4	2.0581	2.0581	2.0581	NA	2.0581	5	2.0581	2.0581	2.0581	2.0581	NA	2.0581	1	NA	2.0581	2.0581	2.0581	2.0581	1	NA	2.0581	2.0581	2.0581
1193	71210	HRZ06_0067	125915	2010	2701	5	1	10	W9A10YANA	3755	43	59	2	3	RFD	2.2021	g/100g	30/10/10 Lucerne	LAST	W9A10YANA_RFD	14.5	20	-4.429245283	-0.811320755	YANA	1	NA	2.2021	2.2021	2.2021	2.2021	3	2.2021	2.2021	NA	2.2021	2.2021	2.2021	1	NA	2.2021	2.2021	2.2021	2.2021	4	2.2021	2.2021	2.2021	NA
1194	71211	WW19754	125868	2010	2687	5	1	11	W9A10YANA	3708	43	12	1	1	IRR	1.9478	g/100g	23/10/10 Lucerne	LAST	W9A10YANA_IRR	-32.5	20	-4.429245283	-0.811320755	YANA	1	NA	1.9478	1.9478	1.9478	1.9478	5	1.9478	1.9478	1.9478	1.9478	NA	1.9478	2	1.9478	NA	1.9478	1.9478	1.9478	1	NA	1.9478	1.9478	1.9478
1195	71212	WW19147	118471	2010	86	5	1	12	W9A10COLE	263	4	35	1	1	IRR	1.5952	g/100g	12/10/2010	LAST	W9A10COLE_IRR	-3.5	-22.5	-4.429245283	-0.811320755	COLE	5	1.5952	1.5952	1.5952	1.5952	NA	4	1.5952	1.5952	1.5952	NA	1.5952	1.5952	4	1.5952	1.5952	1.5952	NA	1.5952	2	1.5952	NA	1.5952	1.5952
1196	71213	EGA_JAEGER	119152	2010	331	5	1	13	W9A10COLE	944	13	32	1	1	IRR	1.7775	g/100g	12/10/2010	LAST	W9A10COLE_IRR	-6.5	-13.5	-4.429245283	-0.811320755	COLE	5	1.7775	1.7775	1.7775	1.7775	NA	1	NA	1.7775	1.7775	1.7775	1.7775	1.7775	5	1.7775	1.7775	1.7775	1.7775	NA	5	1.7775	1.7775	1.7775	1.7775
1197	71215	WW19513	121354	2010	1089	5	1	15	W9A10COLE	3146	42	30	2	4	IRR	2.2581	g/100g	27/10/10 Lucerne	LAST	W9A10COLE_IRR	-8.5	15.5	-4.429245283	-0.811320755	COLE	3	2.2581	2.2581	NA	2.2581	2.2581	1	NA	2.2581	2.2581	2.2581	2.2581	2.2581	2	2.2581	NA	2.2581	2.2581	2.2581	4	2.2581	2.2581	2.2581	NA
1198	71216	WW19866	122883	2010	1642	5	1	16	W9A10YANA	723	9	19	1	1	IRR	1.7629	g/100g	23/10/10 Lucerne	LAST	W9A10YANA_IRR	-25.5	-14	-4.429245283	-0.811320755	YANA	4	1.7629	1.7629	1.7629	NA	1.7629	3	1.7629	1.7629	NA	1.7629	1.7629	1.7629	1	NA	1.7629	1.7629	1.7629	1.7629	4	1.7629	1.7629	1.7629	NA
1199	71217	HRZ04_0420	119860	2010	581	5	1	17	W9A10COLE	1652	22	56	1	2	RFD	1.5375	g/100g	19/10/2010	LAST	W9A10COLE_RFD	17.5	-4.5	-4.429245283	-0.811320755	COLE	2	1.5375	NA	1.5375	1.5375	1.5375	1	NA	1.5375	1.5375	1.5375	1.5375	1.5375	2	1.5375	NA	1.5375	1.5375	1.5375	5	1.5375	1.5375	1.5375	1.5375
1200	71218	VV2321	121994	2010	1327	5	1	18	W9A10COLE	3786	50	62	2	4	IRR	1.9366	g/100g	27/10/10 Lucerne	LAST	W9A10COLE_IRR	23.5	23.5	-4.429245283	-0.811320755	COLE	1	NA	1.9366	1.9366	1.9366	1.9366	4	1.9366	1.9366	1.9366	NA	1.9366	1.9366	1	NA	1.9366	1.9366	1.9366	1.9366	5	1.9366	1.9366	1.9366	1.9366
1201	71219	WW18769	119753	2010	551	5	1	19	W9A10COLE	1545	21	25	1	2	RFD	2.3795	g/100g	12/10/2010	LAST	W9A10COLE_RFD	-13.5	-5.5	-4.429245283	-0.811320755	COLE	4	2.3795	2.3795	2.3795	NA	2.3795	1	NA	2.3795	2.3795	2.3795	2.3795	2.3795	3	2.3795	2.3795	NA	2.3795	2.3795	1	NA	2.3795	2.3795	2.3795
1202	71220	VT2474	123211	2010	1769	5	1	20	W9A10YANA	1051	12	83	2	4	IRR	1.9252	g/100g	30/10/10 Hurricane	LAST	W9A10YANA_IRR	38.5	-11	-4.429245283	-0.811320755	YANA	5	1.9252	1.9252	1.9252	1.9252	NA	5	1.9252	1.9252	1.9252	1.9252	NA	1.9252	3	1.9252	1.9252	NA	1.9252	1.9252	5	1.9252	1.9252	1.9252	1.9252
1203	71221	VW3405	118902	2010	224	5	1	21	W9A10COLE	694	10	10	1	1	IRR	1.4531	g/100g	19/10/2010	LAST	W9A10COLE_IRR	-28.5	-16.5	-4.429245283	-0.811320755	COLE	3	1.4531	1.4531	NA	1.4531	1.4531	3	1.4531	1.4531	NA	1.4531	1.4531	1.4531	1	NA	1.4531	1.4531	1.4531	1.4531	5	1.4531	1.4531	1.4531	1.4531
1204	71222	VW4076	121801	2010	1255	5	1	22	W9A10COLE	3593	48	21	2	4	IRR	2.0454	g/100g	27/10/10 Hurricane	LAST	W9A10COLE_IRR	-17.5	21.5	-4.429245283	-0.811320755	COLE	2	2.0454	NA	2.0454	2.0454	2.0454	2	2.0454	NA	2.0454	2.0454	2.0454	2.0454	2	2.0454	NA	2.0454	2.0454	2.0454	5	2.0454	2.0454	2.0454	2.0454
1205	71223	65211_176	120593	2010	818	5	1	23	W9A10COLE	2385	32	29	2	3	RFD	1.9296	g/100g	27/10/10 Lucerne	LAST	W9A10COLE_RFD	-9.5	5.5	-4.429245283	-0.811320755	COLE	2	1.9296	NA	1.9296	1.9296	1.9296	3	1.9296	1.9296	NA	1.9296	1.9296	1.9296	5	1.9296	1.9296	1.9296	1.9296	NA	3	1.9296	1.9296	NA	1.9296
1206	71224	VW2324	125037	2010	2393	5	1	24	W9A10YANA	2877	33	61	2	3	RFD	1.7946	g/100g	30/10/10 Lucerne	LAST	W9A10YANA_RFD	16.5	10	-4.429245283	-0.811320755	YANA	4	1.7946	1.7946	1.7946	NA	1.7946	3	1.7946	1.7946	NA	1.7946	1.7946	1.7946	5	1.7946	1.7946	1.7946	1.7946	NA	1	NA	1.7946	1.7946	1.7946
1207	71225	HRZ04_0533	118805	2010	196	5	1	25	W9A10COLE	597	8	65	1	1	IRR	2.1411	g/100g	19/10/2010	LAST	W9A10COLE_IRR	26.5	-18.5	-4.429245283	-0.811320755	COLE	3	2.1411	2.1411	NA	2.1411	2.1411	3	2.1411	2.1411	NA	2.1411	2.1411	2.1411	1	NA	2.1411	2.1411	2.1411	2.1411	3	2.1411	2.1411	NA	2.1411
1208	71226	VV2401	121836	2010	1268	5	1	26	W9A10COLE	3628	48	56	2	4	IRR	1.0306	g/100g	27/10/10 Lucerne	LAST	W9A10COLE_IRR	17.5	21.5	-4.429245283	-0.811320755	COLE	2	1.0306	NA	1.0306	1.0306	1.0306	3	1.0306	1.0306	NA	1.0306	1.0306	1.0306	2	1.0306	NA	1.0306	1.0306	1.0306	3	1.0306	1.0306	NA	1.0306
1209	71227	VW4326	121901	2010	1295	5	1	27	W9A10COLE	3693	49	45	2	4	IRR	1.5922	g/100g	27/10/10 Lucerne	LAST	W9A10COLE_IRR	6.5	22.5	-4.429245283	-0.811320755	COLE	3	1.5922	1.5922	NA	1.5922	1.5922	4	1.5922	1.5922	1.5922	NA	1.5922	1.5922	3	1.5922	1.5922	NA	1.5922	1.5922	2	1.5922	NA	1.5922	1.5922
1210	71228	RAC1442	120960	2010	966	5	1	28	W9A10COLE	2752	37	16	2	3	RFD	2.4095	g/100g	27/10/10 Lucerne	LAST	W9A10COLE_RFD	-22.5	10.5	-4.429245283	-0.811320755	COLE	5	2.4095	2.4095	2.4095	2.4095	NA	5	2.4095	2.4095	2.4095	2.4095	NA	2.4095	1	NA	2.4095	2.4095	2.4095	2.4095	4	2.4095	2.4095	2.4095	NA
1211	71229	MERINDA	125283	2010	2488	5	1	29	W9A10YANA	3123	36	43	1	2	RFD	2.218	g/100g	23/10/10 Hurricane	LAST	W9A10YANA_RFD	-1.5	13	-4.429245283	-0.811320755	YANA	3	2.218	2.218	NA	2.218	2.218	3	2.218	2.218	NA	2.218	2.218	2.218	5	2.218	2.218	2.218	2.218	NA	5	2.218	2.218	2.218	2.218
1212	71230	WW20068	125459	2010	2551	5	1	30	W9A10YANA	3299	38	43	1	2	RFD	2.3562	g/100g	23/10/10 Hurricane	LAST	W9A10YANA_RFD	-1.5	15	-4.429245283	-0.811320755	YANA	3	2.3562	2.3562	NA	2.3562	2.3562	1	NA	2.3562	2.3562	2.3562	2.3562	2.3562	1	NA	2.3562	2.3562	2.3562	2.3562	2	2.3562	NA	2.3562	2.3562
1213	71231	VW2782	120190	2010	696	5	2	1	W9A10COLE	1982	27	6	2	3	RFD	2.1531	g/100g	27/10/10 Lucerne	LAST	W9A10COLE_RFD	-32.5	0.5	-3.429245283	-0.811320755	COLE	1	NA	2.1531	2.1531	2.1531	2.1531	3	2.1531	2.1531	NA	2.1531	2.1531	2.1531	4	2.1531	2.1531	2.1531	NA	2.1531	3	2.1531	2.1531	NA	2.1531
1214	71232	WW20665	119922	2010	607	5	2	2	W9A10COLE	1714	23	42	1	2	RFD	2.0206	g/100g	19/10/2010	LAST	W9A10COLE_RFD	3.5	-3.5	-3.429245283	-0.811320755	COLE	1	NA	2.0206	2.0206	2.0206	2.0206	5	2.0206	2.0206	2.0206	2.0206	NA	2.0206	3	2.0206	2.0206	NA	2.0206	2.0206	4	2.0206	2.0206	2.0206	NA
1215	71233	WW20571	120950	2010	959	5	2	3	W9A10COLE	2742	37	6	2	3	RFD	1.883	g/100g	27/10/10 Lucerne	LAST	W9A10COLE_RFD	-32.5	10.5	-3.429245283	-0.811320755	COLE	2	1.883	NA	1.883	1.883	1.883	4	1.883	1.883	1.883	NA	1.883	1.883	4	1.883	1.883	1.883	NA	1.883	3	1.883	1.883	NA	1.883
1216	71234	QT13359	123951	2010	2023	5	2	4	W9A10YANA	1791	21	31	1	2	RFD	2.0052	g/100g	23/10/10 Hurricane	LAST	W9A10YANA_RFD	-13.5	-2	-3.429245283	-0.811320755	YANA	1	NA	2.0052	2.0052	2.0052	2.0052	3	2.0052	2.0052	NA	2.0052	2.0052	2.0052	5	2.0052	2.0052	2.0052	2.0052	NA	3	2.0052	2.0052	NA	2.0052
1217	71235	HRZ03_0062	123468	2010	1857	5	2	5	W9A10YANA	1308	15	76	2	4	IRR	1.7286	g/100g	30/10/10 Hurricane	LAST	W9A10YANA_IRR	31.5	-8	-3.429245283	-0.811320755	YANA	3	1.7286	1.7286	NA	1.7286	1.7286	2	1.7286	NA	1.7286	1.7286	1.7286	1.7286	3	1.7286	1.7286	NA	1.7286	1.7286	3	1.7286	1.7286	NA	1.7286
1218	71236	HRZ06_0250	123022	2010	1702	5	2	6	W9A10YANA	862	10	70	2	4	IRR	1.0632	g/100g	30/10/10 Hurricane	LAST	W9A10YANA_IRR	25.5	-13	-3.429245283	-0.811320755	YANA	1	NA	1.0632	1.0632	1.0632	1.0632	3	1.0632	1.0632	NA	1.0632	1.0632	1.0632	4	1.0632	1.0632	1.0632	NA	1.0632	5	1.0632	1.0632	1.0632	1.0632
1219	71237	WW18830	121069	2010	1014	5	2	7	W9A10COLE	2861	38	49	2	3	RFD	1.7352	g/100g	27/10/10 Lucerne	LAST	W9A10COLE_RFD	10.5	11.5	-3.429245283	-0.811320755	COLE	5	1.7352	1.7352	1.7352	1.7352	NA	2	1.7352	NA	1.7352	1.7352	1.7352	1.7352	4	1.7352	1.7352	1.7352	NA	1.7352	5	1.7352	1.7352	1.7352	1.7352
1220	71238	AUS33697	124123	2010	2090	5	2	8	W9A10YANA	1963	23	27	1	2	RFD	2.2348	g/100g	23/10/10 Hurricane	LAST	W9A10YANA_RFD	-17.5	0	-3.429245283	-0.811320755	YANA	3	2.2348	2.2348	NA	2.2348	2.2348	2	2.2348	NA	2.2348	2.2348	2.2348	2.2348	5	2.2348	2.2348	2.2348	2.2348	NA	1	NA	2.2348	2.2348	2.2348
1221	71239	HRZ04_0531	119623	2010	509	5	2	9	W9A10COLE	1415	19	47	1	2	RFD	1.3796	g/100g	12/10/2010	LAST	W9A10COLE_RFD	8.5	-7.5	-3.429245283	-0.811320755	COLE	5	1.3796	1.3796	1.3796	1.3796	NA	4	1.3796	1.3796	1.3796	NA	1.3796	1.3796	5	1.3796	1.3796	1.3796	1.3796	NA	3	1.3796	1.3796	NA	1.3796
1222	71240	WI25053	118740	2010	166	5	2	10	W9A10COLE	532	7	76	1	1	IRR	1.3176	g/100g	19/10/2010	LAST	W9A10COLE_IRR	37.5	-19.5	-3.429245283	-0.811320755	COLE	2	1.3176	NA	1.3176	1.3176	1.3176	1	NA	1.3176	1.3176	1.3176	1.3176	1.3176	5	1.3176	1.3176	1.3176	1.3176	NA	3	1.3176	1.3176	NA	1.3176
1223	71241	HRZ06_0323	118784	2010	185	5	2	11	W9A10COLE	576	8	44	1	1	IRR	1.3919	g/100g	19/10/2010	LAST	W9A10COLE_IRR	5.5	-18.5	-3.429245283	-0.811320755	COLE	3	1.3919	1.3919	NA	1.3919	1.3919	2	1.3919	NA	1.3919	1.3919	1.3919	1.3919	3	1.3919	1.3919	NA	1.3919	1.3919	1	NA	1.3919	1.3919	1.3919
1224	71242	7896_254	118801	2010	194	5	2	12	W9A10COLE	593	8	61	1	1	IRR	2.037	g/100g	19/10/2010	LAST	W9A10COLE_IRR	22.5	-18.5	-3.429245283	-0.811320755	COLE	3	2.037	2.037	NA	2.037	2.037	2	2.037	NA	2.037	2.037	2.037	2.037	5	2.037	2.037	2.037	2.037	NA	4	2.037	2.037	2.037	NA
1225	71243	HRZ04_0188	122085	2010	1362	5	2	13	W9A10COLE	3877	52	1	2	4	IRR	1.4837	g/100g	27/10/10 Lucerne	LAST	W9A10COLE_IRR	-37.5	25.5	-3.429245283	-0.811320755	COLE	5	1.4837	1.4837	1.4837	1.4837	NA	2	1.4837	NA	1.4837	1.4837	1.4837	1.4837	2	1.4837	NA	1.4837	1.4837	1.4837	3	1.4837	1.4837	NA	1.4837
1226	71244	HRZ06_0141	118441	2010	77	5	2	14	W9A10COLE	233	4	5	1	1	IRR	1.9304	g/100g	19/10/2010	LAST	W9A10COLE_IRR	-33.5	-22.5	-3.429245283	-0.811320755	COLE	3	1.9304	1.9304	NA	1.9304	1.9304	3	1.9304	1.9304	NA	1.9304	1.9304	1.9304	4	1.9304	1.9304	1.9304	NA	1.9304	1	NA	1.9304	1.9304	1.9304
1227	71245	QT13365	126083	2010	2767	5	2	15	W9A10YANA	3923	45	51	2	3	RFD	1.8297	g/100g	30/10/10 Lucerne	LAST	W9A10YANA_RFD	6.5	22	-3.429245283	-0.811320755	YANA	2	1.8297	NA	1.8297	1.8297	1.8297	1	NA	1.8297	1.8297	1.8297	1.8297	1.8297	2	1.8297	NA	1.8297	1.8297	1.8297	5	1.8297	1.8297	1.8297	1.8297
1228	71246	HRZ04_0231	123008	2010	1695	5	2	16	W9A10YANA	848	10	56	2	3	RFD	2.0755	g/100g	30/10/10 Lucerne	LAST	W9A10YANA_RFD	11.5	-13	-3.429245283	-0.811320755	YANA	5	2.0755	2.0755	2.0755	2.0755	NA	1	NA	2.0755	2.0755	2.0755	2.0755	2.0755	5	2.0755	2.0755	2.0755	2.0755	NA	2	2.0755	NA	2.0755	2.0755
1229	71247	HRZ04_0231	125064	2010	2403	5	2	17	W9A10YANA	2904	33	88	2	4	IRR	1.8607	g/100g	30/10/10 Hurricane	LAST	W9A10YANA_IRR	43.5	10	-3.429245283	-0.811320755	YANA	5	1.8607	1.8607	1.8607	1.8607	NA	1	NA	1.8607	1.8607	1.8607	1.8607	1.8607	5	1.8607	1.8607	1.8607	1.8607	NA	2	1.8607	NA	1.8607	1.8607
1230	71248	WW20680	121823	2010	1264	5	2	18	W9A10COLE	3615	48	43	2	4	IRR	0.79475	g/100g	27/10/10 Lucerne	LAST	W9A10COLE_IRR	4.5	21.5	-3.429245283	-0.811320755	COLE	2	0.79475	NA	0.79475	0.79475	0.79475	5	0.79475	0.79475	0.79475	0.79475	NA	0.79475	5	0.79475	0.79475	0.79475	0.79475	NA	2	0.79475	NA	0.79475	0.79475
1231	71249	QT13375	119399	2010	438	5	2	19	W9A10COLE	1191	16	51	1	2	RFD	1.4909	g/100g	19/10/2010	LAST	W9A10COLE_RFD	12.5	-10.5	-3.429245283	-0.811320755	COLE	3	1.4909	1.4909	NA	1.4909	1.4909	3	1.4909	1.4909	NA	1.4909	1.4909	1.4909	4	1.4909	1.4909	1.4909	NA	1.4909	2	1.4909	NA	1.4909	1.4909
1232	71250	WW9696	120831	2010	903	5	2	20	W9A10COLE	2623	35	39	2	3	RFD	2.1303	g/100g	27/10/10 Lucerne	LAST	W9A10COLE_RFD	0.5	8.5	-3.429245283	-0.811320755	COLE	5	2.1303	2.1303	2.1303	2.1303	NA	3	2.1303	2.1303	NA	2.1303	2.1303	2.1303	3	2.1303	2.1303	NA	2.1303	2.1303	1	NA	2.1303	2.1303	2.1303
1233	71251	HRZ06_2087	125662	2010	2615	5	2	21	W9A10YANA	3502	40	70	2	4	IRR	2.2008	g/100g	30/10/10 Lucerne	BACKWARDS	W9A10YANA_IRR	25.5	17	-3.429245283	-0.811320755	YANA	2	2.2008	NA	2.2008	2.2008	2.2008	3	2.2008	2.2008	NA	2.2008	2.2008	2.2008	2	2.2008	NA	2.2008	2.2008	2.2008	5	2.2008	2.2008	2.2008	2.2008
1234	71252	VW0241	123309	2010	1802	5	2	22	W9A10YANA	1149	14	5	1	1	IRR	1.2161	g/100g	23/10/10 Hurricane	LAST	W9A10YANA_IRR	-39.5	-9	-3.429245283	-0.811320755	YANA	4	1.2161	1.2161	1.2161	NA	1.2161	5	1.2161	1.2161	1.2161	1.2161	NA	1.2161	3	1.2161	1.2161	NA	1.2161	1.2161	2	1.2161	NA	1.2161	1.2161
1235	71253	VW3195	123567	2010	1893	5	2	23	W9A10YANA	1407	16	87	2	4	IRR	1.4945	g/100g	30/10/10 Hurricane	LAST	W9A10YANA_IRR	42.5	-7	-3.429245283	-0.811320755	YANA	2	1.4945	NA	1.4945	1.4945	1.4945	5	1.4945	1.4945	1.4945	1.4945	NA	1.4945	1	NA	1.4945	1.4945	1.4945	1.4945	5	1.4945	1.4945	1.4945	1.4945
1236	71254	WW20571	124613	2010	2255	5	2	24	W9A10YANA	2453	28	77	2	4	IRR	1.7748	g/100g	30/10/10 Hurricane	LAST	W9A10YANA_IRR	32.5	5	-3.429245283	-0.811320755	YANA	2	1.7748	NA	1.7748	1.7748	1.7748	4	1.7748	1.7748	1.7748	NA	1.7748	1.7748	4	1.7748	1.7748	1.7748	NA	1.7748	3	1.7748	1.7748	NA	1.7748
1237	71255	WW19513	124824	2010	2322	5	2	25	W9A10YANA	2664	31	24	1	2	RFD	2.0514	g/100g	23/10/10 Hurricane	LAST	W9A10YANA_RFD	-20.5	8	-3.429245283	-0.811320755	YANA	3	2.0514	2.0514	NA	2.0514	2.0514	1	NA	2.0514	2.0514	2.0514	2.0514	2.0514	2	2.0514	NA	2.0514	2.0514	2.0514	4	2.0514	2.0514	2.0514	NA
1238	71256	IRENA/BABAX//PASTOR	124779	2010	2300	5	2	26	W9A10YANA	2619	30	67	2	4	IRR	1.6682	g/100g	30/10/10 Lucerne	LAST	W9A10YANA_IRR	22.5	7	-3.429245283	-0.811320755	YANA	5	1.6682	1.6682	1.6682	1.6682	NA	1	NA	1.6682	1.6682	1.6682	1.6682	1.6682	2	1.6682	NA	1.6682	1.6682	1.6682	2	1.6682	NA	1.6682	1.6682
1239	71257	HRZ04_0425	125883	2010	2693	5	2	27	W9A10YANA	3723	43	27	1	2	RFD	2.3139	g/100g	23/10/10 Hurricane	LAST	W9A10YANA_RFD	-17.5	20	-3.429245283	-0.811320755	YANA	4	2.3139	2.3139	2.3139	NA	2.3139	2	2.3139	NA	2.3139	2.3139	2.3139	2.3139	2	2.3139	NA	2.3139	2.3139	2.3139	2	2.3139	NA	2.3139	2.3139
1240	71258	AUS33466	118907	2010	226	5	2	28	W9A10COLE	699	10	15	1	1	IRR	1.6503	g/100g	19/10/2010	LAST	W9A10COLE_IRR	-23.5	-16.5	-3.429245283	-0.811320755	COLE	1	NA	1.6503	1.6503	1.6503	1.6503	1	NA	1.6503	1.6503	1.6503	1.6503	1.6503	4	1.6503	1.6503	1.6503	NA	1.6503	4	1.6503	1.6503	1.6503	NA
1241	71259	HRZ05_0137	122319	2010	1448	5	2	29	W9A10YANA	159	2	71	2	4	IRR	2.1912	g/100g	30/10/10 Hurricane	LAST	W9A10YANA_IRR	26.5	-21	-3.429245283	-0.811320755	YANA	1	NA	2.1912	2.1912	2.1912	2.1912	5	2.1912	2.1912	2.1912	2.1912	NA	2.1912	3	2.1912	2.1912	NA	2.1912	2.1912	2	2.1912	NA	2.1912	2.1912
1242	71260	7896_254	124291	2010	2147	5	2	30	W9A10YANA	2131	25	19	1	1	IRR	1.8329	g/100g	23/10/10 Lucerne	LAST	W9A10YANA_IRR	-25.5	2	-3.429245283	-0.811320755	YANA	3	1.8329	1.8329	NA	1.8329	1.8329	2	1.8329	NA	1.8329	1.8329	1.8329	1.8329	5	1.8329	1.8329	1.8329	1.8329	NA	4	1.8329	1.8329	1.8329	NA
1243	71261	HRZ06_0321	120931	2010	948	5	3	1	W9A10COLE	2723	36	63	2	3	RFD	1.5165	g/100g	27/10/10 Lucerne	LAST	W9A10COLE_RFD	24.5	9.5	-2.429245283	-0.811320755	COLE	4	1.5165	1.5165	1.5165	NA	1.5165	2	1.5165	NA	1.5165	1.5165	1.5165	1.5165	2	1.5165	NA	1.5165	1.5165	1.5165	4	1.5165	1.5165	1.5165	NA
1244	71262	VW3405	125399	2010	2526	5	3	2	W9A10YANA	3239	37	71	2	4	IRR	1.4954	g/100g	30/10/10 Lucerne	LAST	W9A10YANA_IRR	26.5	14	-2.429245283	-0.811320755	YANA	3	1.4954	1.4954	NA	1.4954	1.4954	3	1.4954	1.4954	NA	1.4954	1.4954	1.4954	1	NA	1.4954	1.4954	1.4954	1.4954	5	1.4954	1.4954	1.4954	1.4954
1245	71263	VW1286	120745	2010	876	5	3	3	W9A10COLE	2537	34	29	2	3	RFD	2.5677	g/100g	27/10/10 Lucerne	LAST	W9A10COLE_RFD	-9.5	7.5	-2.429245283	-0.811320755	COLE	3	2.5677	2.5677	NA	2.5677	2.5677	5	2.5677	2.5677	2.5677	2.5677	NA	2.5677	3	2.5677	2.5677	NA	2.5677	2.5677	4	2.5677	2.5677	2.5677	NA
1246	71264	HRZ06_0270	125209	2010	2455	5	3	4	W9A10YANA	3049	35	57	2	3	RFD	1.8902	g/100g	30/10/10 Lucerne	LAST	W9A10YANA_RFD	12.5	12	-2.429245283	-0.811320755	YANA	2	1.8902	NA	1.8902	1.8902	1.8902	2	1.8902	NA	1.8902	1.8902	1.8902	1.8902	4	1.8902	1.8902	1.8902	NA	1.8902	5	1.8902	1.8902	1.8902	1.8902
1247	71265	VW4326	118702	2010	156	5	3	5	W9A10COLE	494	7	38	1	1	IRR	0.84235	g/100g	12/10/2010	LAST	W9A10COLE_IRR	-0.5	-19.5	-2.429245283	-0.811320755	COLE	3	0.84235	0.84235	NA	0.84235	0.84235	4	0.84235	0.84235	0.84235	NA	0.84235	0.84235	3	0.84235	0.84235	NA	0.84235	0.84235	2	0.84235	NA	0.84235	0.84235
1248	71266	ATTILA	120347	2010	743	5	3	6	W9A10COLE	2139	29	11	2	3	RFD	2.6399	g/100g	27/10/10 Lucerne	LAST	W9A10COLE_RFD	-27.5	2.5	-2.429245283	-0.811320755	COLE	1	NA	2.6399	2.6399	2.6399	2.6399	5	2.6399	2.6399	2.6399	2.6399	NA	2.6399	3	2.6399	2.6399	NA	2.6399	2.6399	1	NA	2.6399	2.6399	2.6399
1249	71267	334609_1	125230	2010	2463	5	3	7	W9A10YANA	3070	35	78	2	4	IRR	1.7191	g/100g	30/10/10 Hurricane	LAST	W9A10YANA_IRR	33.5	12	-2.429245283	-0.811320755	YANA	1	NA	1.7191	1.7191	1.7191	1.7191	3	1.7191	1.7191	NA	1.7191	1.7191	1.7191	5	1.7191	1.7191	1.7191	1.7191	NA	3	1.7191	1.7191	NA	1.7191
1250	71268	WW20680	125556	2010	2581	5	3	8	W9A10YANA	3396	39	52	2	3	RFD	1.6531	g/100g	30/10/10 Lucerne	LAST	W9A10YANA_RFD	7.5	16	-2.429245283	-0.811320755	YANA	2	1.6531	NA	1.6531	1.6531	1.6531	5	1.6531	1.6531	1.6531	1.6531	NA	1.6531	5	1.6531	1.6531	1.6531	1.6531	NA	2	1.6531	NA	1.6531	1.6531
1251	71269	118849_303	125327	2010	2502	5	3	9	W9A10YANA	3167	36	87	2	4	IRR	1.4193	g/100g	30/10/10 Hurricane	LAST	W9A10YANA_IRR	42.5	13	-2.429245283	-0.811320755	YANA	5	1.4193	1.4193	1.4193	1.4193	NA	1	NA	1.4193	1.4193	1.4193	1.4193	1.4193	5	1.4193	1.4193	1.4193	1.4193	NA	5	1.4193	1.4193	1.4193	1.4193
1252	71270	WW18949	121670	2010	1210	5	3	10	W9A10COLE	3462	46	42	2	4	IRR	1.9825	g/100g	27/10/10 Hurricane	LAST	W9A10COLE_IRR	3.5	19.5	-2.429245283	-0.811320755	COLE	5	1.9825	1.9825	1.9825	1.9825	NA	3	1.9825	1.9825	NA	1.9825	1.9825	1.9825	2	1.9825	NA	1.9825	1.9825	1.9825	4	1.9825	1.9825	1.9825	NA
1253	71271	VW3170	123404	2010	1835	5	3	11	W9A10YANA	1244	15	12	1	1	IRR	1.6925	g/100g	23/10/10 Lucerne	LAST	W9A10YANA_IRR	-32.5	-8	-2.429245283	-0.811320755	YANA	5	1.6925	1.6925	1.6925	1.6925	NA	1	NA	1.6925	1.6925	1.6925	1.6925	1.6925	3	1.6925	1.6925	NA	1.6925	1.6925	2	1.6925	NA	1.6925	1.6925
1254	71272	GUARDIAN	125725	2010	2638	5	3	12	W9A10YANA	3565	41	45	2	3	RFD	1.919	g/100g	30/10/10 Hurricane	LAST	W9A10YANA_RFD	0.5	18	-2.429245283	-0.811320755	YANA	1	NA	1.919	1.919	1.919	1.919	4	1.919	1.919	1.919	NA	1.919	1.919	4	1.919	1.919	1.919	NA	1.919	1	NA	1.919	1.919	1.919
1255	71273	VW2001	118572	2010	116	5	3	13	W9A10COLE	364	5	60	1	1	IRR	1.2585	g/100g	19/10/2010	LAST	W9A10COLE_IRR	21.5	-21.5	-2.429245283	-0.811320755	COLE	2	1.2585	NA	1.2585	1.2585	1.2585	5	1.2585	1.2585	1.2585	1.2585	NA	1.2585	4	1.2585	1.2585	1.2585	NA	1.2585	3	1.2585	1.2585	NA	1.2585
1256	71274	WW16367	126113	2010	2774	5	3	14	W9A10YANA	3953	45	81	2	4	IRR	1.3634	g/100g	30/10/10 Hurricane	LAST	W9A10YANA_IRR	36.5	22	-2.429245283	-0.811320755	YANA	4	1.3634	1.3634	1.3634	NA	1.3634	4	1.3634	1.3634	1.3634	NA	1.3634	1.3634	2	1.3634	NA	1.3634	1.3634	1.3634	3	1.3634	1.3634	NA	1.3634
1257	71275	WW19127	120107	2010	671	5	3	15	W9A10COLE	1899	25	75	1	2	RFD	1.5764	g/100g	19/10/2010	LAST	W9A10COLE_RFD	36.5	-1.5	-2.429245283	-0.811320755	COLE	1	NA	1.5764	1.5764	1.5764	1.5764	5	1.5764	1.5764	1.5764	1.5764	NA	1.5764	2	1.5764	NA	1.5764	1.5764	1.5764	3	1.5764	1.5764	NA	1.5764
1258	71276	WW20159	125247	2010	2471	5	3	16	W9A10YANA	3087	36	7	1	1	IRR	2.4502	g/100g	23/10/10 Lucerne	LAST	W9A10YANA_IRR	-37.5	13	-2.429245283	-0.811320755	YANA	4	2.4502	2.4502	2.4502	NA	2.4502	1	NA	2.4502	2.4502	2.4502	2.4502	2.4502	1	NA	2.4502	2.4502	2.4502	2.4502	3	2.4502	2.4502	NA	2.4502
1259	71277	WW14314	123854	2010	1987	5	3	17	W9A10YANA	1694	20	22	1	1	IRR	1.747	g/100g	23/10/10 Lucerne	LAST	W9A10YANA_IRR	-22.5	-3	-2.429245283	-0.811320755	YANA	3	1.747	1.747	NA	1.747	1.747	5	1.747	1.747	1.747	1.747	NA	1.747	3	1.747	1.747	NA	1.747	1.747	3	1.747	1.747	NA	1.747
1260	71278	WW20140	120589	2010	816	5	3	18	W9A10COLE	2381	32	25	2	3	RFD	1.7064	g/100g	27/10/10 Lucerne	LAST	W9A10COLE_RFD	-13.5	5.5	-2.429245283	-0.811320755	COLE	3	1.7064	1.7064	NA	1.7064	1.7064	4	1.7064	1.7064	1.7064	NA	1.7064	1.7064	4	1.7064	1.7064	1.7064	NA	1.7064	5	1.7064	1.7064	1.7064	1.7064
1261	71279	HRZ04_0421	120677	2010	851	5	3	19	W9A10COLE	2469	33	37	2	3	RFD	2.1131	g/100g	27/10/10 Lucerne	LAST	W9A10COLE_RFD	-1.5	6.5	-2.429245283	-0.811320755	COLE	5	2.1131	2.1131	2.1131	2.1131	NA	1	NA	2.1131	2.1131	2.1131	2.1131	2.1131	1	NA	2.1131	2.1131	2.1131	2.1131	1	NA	2.1131	2.1131	2.1131
1262	71280	AUS33466	124571	2010	2238	5	3	20	W9A10YANA	2411	28	35	1	2	RFD	2.1772	g/100g	23/10/10 Hurricane	LAST	W9A10YANA_RFD	-9.5	5	-2.429245283	-0.811320755	YANA	1	NA	2.1772	2.1772	2.1772	2.1772	1	NA	2.1772	2.1772	2.1772	2.1772	2.1772	4	2.1772	2.1772	2.1772	NA	2.1772	4	2.1772	2.1772	2.1772	NA
1263	71281	AXE	124667	2010	2269	5	3	21	W9A10YANA	2507	29	43	1	2	RFD	2.3951	g/100g	23/10/10 Hurricane	LAST	W9A10YANA_RFD	-1.5	6	-2.429245283	-0.811320755	YANA	2	2.3951	NA	2.3951	2.3951	2.3951	4	2.3951	2.3951	2.3951	NA	2.3951	2.3951	1	NA	2.3951	2.3951	2.3951	2.3951	5	2.3951	2.3951	2.3951	2.3951
1264	71282	HRZ05_0085	119493	2010	472	5	3	22	W9A10COLE	1285	17	69	1	2	RFD	1.3804	g/100g	19/10/2010	LAST	W9A10COLE_RFD	30.5	-9.5	-2.429245283	-0.811320755	COLE	1	NA	1.3804	1.3804	1.3804	1.3804	5	1.3804	1.3804	1.3804	1.3804	NA	1.3804	4	1.3804	1.3804	1.3804	NA	1.3804	4	1.3804	1.3804	1.3804	NA
1265	71283	HRZ03_0005	121581	2010	1183	5	3	23	W9A10COLE	3373	45	29	2	4	IRR	2.1367	g/100g	27/10/10 Lucerne	LAST	W9A10COLE_IRR	-9.5	18.5	-2.429245283	-0.811320755	COLE	1	NA	2.1367	2.1367	2.1367	2.1367	4	2.1367	2.1367	2.1367	NA	2.1367	2.1367	5	2.1367	2.1367	2.1367	2.1367	NA	5	2.1367	2.1367	2.1367	2.1367
1266	71284	WW20383	125920	2010	2706	5	3	24	W9A10YANA	3760	43	64	2	3	RFD	1.875	g/100g	30/10/10 Lucerne	LAST	W9A10YANA_RFD	19.5	20	-2.429245283	-0.811320755	YANA	4	1.875	1.875	1.875	NA	1.875	1	NA	1.875	1.875	1.875	1.875	1.875	5	1.875	1.875	1.875	1.875	NA	1	NA	1.875	1.875	1.875
1267	71285	VW4368	120857	2010	908	5	3	25	W9A10COLE	2649	35	65	2	3	RFD	1.8588	g/100g	27/10/10 Lucerne	LAST	W9A10COLE_RFD	26.5	8.5	-2.429245283	-0.811320755	COLE	4	1.8588	1.8588	1.8588	NA	1.8588	3	1.8588	1.8588	NA	1.8588	1.8588	1.8588	2	1.8588	NA	1.8588	1.8588	1.8588	1	NA	1.8588	1.8588	1.8588
1268	71286	114892_109	123812	2010	1972	5	3	26	W9A10YANA	1652	19	68	2	4	IRR	1.9922	g/100g	30/10/10 Hurricane	LAST	W9A10YANA_IRR	23.5	-4	-2.429245283	-0.811320755	YANA	1	NA	1.9922	1.9922	1.9922	1.9922	3	1.9922	1.9922	NA	1.9922	1.9922	1.9922	5	1.9922	1.9922	1.9922	1.9922	NA	5	1.9922	1.9922	1.9922	1.9922
1269	71287	WW20672	118762	2010	176	5	3	27	W9A10COLE	554	8	22	1	1	IRR	1.666	g/100g	12/10/2010	LAST	W9A10COLE_IRR	-16.5	-18.5	-2.429245283	-0.811320755	COLE	4	1.666	1.666	1.666	NA	1.666	3	1.666	1.666	NA	1.666	1.666	1.666	2	1.666	NA	1.666	1.666	1.666	2	1.666	NA	1.666	1.666
1270	71288	WW21873	118581	2010	122	5	3	28	W9A10COLE	373	5	69	1	1	IRR	1.1586	g/100g	19/10/2010	LAST	W9A10COLE_IRR	30.5	-21.5	-2.429245283	-0.811320755	COLE	3	1.1586	1.1586	NA	1.1586	1.1586	2	1.1586	NA	1.1586	1.1586	1.1586	1.1586	2	1.1586	NA	1.1586	1.1586	1.1586	3	1.1586	1.1586	NA	1.1586
1271	71289	HRZ05_0101	124050	2010	2061	5	3	29	W9A10YANA	1890	22	42	1	2	RFD	2.5009	g/100g	23/10/10 Hurricane	LAST	W9A10YANA_RFD	-2.5	-1	-2.429245283	-0.811320755	YANA	3	2.5009	2.5009	NA	2.5009	2.5009	5	2.5009	2.5009	2.5009	2.5009	NA	2.5009	3	2.5009	2.5009	NA	2.5009	2.5009	2	2.5009	NA	2.5009	2.5009
1272	71290	HRZ06_0034	119292	2010	400	5	3	30	W9A10COLE	1084	15	20	1	2	RFD	2.5794	g/100g	12/10/2010	LAST	W9A10COLE_RFD	-18.5	-11.5	-2.429245283	-0.811320755	COLE	3	2.5794	2.5794	NA	2.5794	2.5794	1	NA	2.5794	2.5794	2.5794	2.5794	2.5794	1	NA	2.5794	2.5794	2.5794	2.5794	3	2.5794	2.5794	NA	2.5794
1273	71291	WW18919	125493	2010	2562	5	4	1	W9A10YANA	3333	38	77	2	4	IRR	1.2821	g/100g	30/10/10 Hurricane	LAST	W9A10YANA_IRR	32.5	15	-1.429245283	-0.811320755	YANA	3	1.2821	1.2821	NA	1.2821	1.2821	2	1.2821	NA	1.2821	1.2821	1.2821	1.2821	5	1.2821	1.2821	1.2821	1.2821	NA	4	1.2821	1.2821	1.2821	NA
1274	71292	VW3595	120667	2010	845	5	4	2	W9A10COLE	2459	33	27	2	3	RFD	1.3672	g/100g	27/10/10 Lucerne	LAST	W9A10COLE_RFD	-11.5	6.5	-1.429245283	-0.811320755	COLE	3	1.3672	1.3672	NA	1.3672	1.3672	5	1.3672	1.3672	1.3672	1.3672	NA	1.3672	4	1.3672	1.3672	1.3672	NA	1.3672	2	1.3672	NA	1.3672	1.3672
1275	71293	WW17950	122033	2010	1341	5	4	3	W9A10COLE	3825	51	25	2	4	IRR	1.6872	g/100g	27/10/10 Lucerne	LAST	W9A10COLE_IRR	-13.5	24.5	-1.429245283	-0.811320755	COLE	1	NA	1.6872	1.6872	1.6872	1.6872	2	1.6872	NA	1.6872	1.6872	1.6872	1.6872	1	NA	1.6872	1.6872	1.6872	1.6872	3	1.6872	1.6872	NA	1.6872
1276	71294	WW18924	125273	2010	2483	5	4	4	W9A10YANA	3113	36	33	1	2	RFD	2.8014	g/100g	23/10/10 Hurricane	LAST	W9A10YANA_RFD	-11.5	13	-1.429245283	-0.811320755	YANA	5	2.8014	2.8014	2.8014	2.8014	NA	3	2.8014	2.8014	NA	2.8014	2.8014	2.8014	1	NA	2.8014	2.8014	2.8014	2.8014	2	2.8014	NA	2.8014	2.8014
1277	71295	334609_1	123160	2010	1749	5	4	5	W9A10YANA	1000	12	32	1	2	RFD	2.6535	g/100g	23/10/10 Hurricane	LAST	W9A10YANA_RFD	-12.5	-11	-1.429245283	-0.811320755	YANA	1	NA	2.6535	2.6535	2.6535	2.6535	3	2.6535	2.6535	NA	2.6535	2.6535	2.6535	5	2.6535	2.6535	2.6535	2.6535	NA	3	2.6535	2.6535	NA	2.6535
1278	71296	VW3463	123144	2010	1741	5	4	6	W9A10YANA	984	12	16	1	1	IRR	2.2252	g/100g	23/10/10 Lucerne	LAST	W9A10YANA_IRR	-28.5	-11	-1.429245283	-0.811320755	YANA	5	2.2252	2.2252	2.2252	2.2252	NA	1	NA	2.2252	2.2252	2.2252	2.2252	2.2252	5	2.2252	2.2252	2.2252	2.2252	NA	5	2.2252	2.2252	2.2252	2.2252
1279	71297	HRZ06_0055	120599	2010	820	5	4	7	W9A10COLE	2391	32	35	2	3	RFD	1.7872	g/100g	27/10/10 Lucerne	LAST	W9A10COLE_RFD	-3.5	5.5	-1.429245283	-0.811320755	COLE	2	1.7872	NA	1.7872	1.7872	1.7872	1	NA	1.7872	1.7872	1.7872	1.7872	1.7872	4	1.7872	1.7872	1.7872	NA	1.7872	4	1.7872	1.7872	1.7872	NA
1280	71298	GILES	120994	2010	980	5	4	8	W9A10COLE	2786	37	50	2	3	RFD	1.8617	g/100g	27/10/10 Lucerne	LAST	W9A10COLE_RFD	11.5	10.5	-1.429245283	-0.811320755	COLE	2	1.8617	NA	1.8617	1.8617	1.8617	1	NA	1.8617	1.8617	1.8617	1.8617	1.8617	5	1.8617	1.8617	1.8617	1.8617	NA	3	1.8617	1.8617	NA	1.8617
1281	71299	SERI_DWARF	121782	2010	1249	5	4	9	W9A10COLE	3574	48	2	2	4	IRR	2.1685	g/100g	27/10/10 Hurricane	LAST	W9A10COLE_IRR	-36.5	21.5	-1.429245283	-0.811320755	COLE	5	2.1685	2.1685	2.1685	2.1685	NA	3	2.1685	2.1685	NA	2.1685	2.1685	2.1685	4	2.1685	2.1685	2.1685	NA	2.1685	2	2.1685	NA	2.1685	2.1685
1282	71300	WW19743	122892	2010	1648	5	4	10	W9A10YANA	732	9	28	1	2	RFD	2.4125	g/100g	23/10/10 Hurricane	LAST	W9A10YANA_RFD	-16.5	-14	-1.429245283	-0.811320755	YANA	5	2.4125	2.4125	2.4125	2.4125	NA	3	2.4125	2.4125	NA	2.4125	2.4125	2.4125	2	2.4125	NA	2.4125	2.4125	2.4125	3	2.4125	2.4125	NA	2.4125
1283	71301	HRZ06_2082	124029	2010	2051	5	4	11	W9A10YANA	1869	22	21	1	1	IRR	1.8903	g/100g	23/10/10 Hurricane	LAST	W9A10YANA_IRR	-23.5	-1	-1.429245283	-0.811320755	YANA	4	1.8903	1.8903	1.8903	NA	1.8903	1	NA	1.8903	1.8903	1.8903	1.8903	1.8903	4	1.8903	1.8903	1.8903	NA	1.8903	4	1.8903	1.8903	1.8903	NA
1284	71302	HRZ06_0299	122118	2010	1373	5	4	12	W9A10COLE	3910	52	34	2	4	IRR	1.247	g/100g	27/10/10 Lucerne	LAST	W9A10COLE_IRR	-4.5	25.5	-1.429245283	-0.811320755	COLE	2	1.247	NA	1.247	1.247	1.247	5	1.247	1.247	1.247	1.247	NA	1.247	5	1.247	1.247	1.247	1.247	NA	5	1.247	1.247	1.247	1.247
1285	71303	HRZ06_0514	120320	2010	735	5	4	13	W9A10COLE	2112	28	60	2	3	RFD	1.983	g/100g	27/10/10 Lucerne	LAST	W9A10COLE_RFD	21.5	1.5	-1.429245283	-0.811320755	COLE	3	1.983	1.983	NA	1.983	1.983	5	1.983	1.983	1.983	1.983	NA	1.983	4	1.983	1.983	1.983	NA	1.983	4	1.983	1.983	1.983	NA
1286	71304	133513_133	125959	2010	2721	5	4	14	W9A10YANA	3799	44	15	1	1	IRR	2.3779	g/100g	23/10/10 Lucerne	LAST	W9A10YANA_IRR	-29.5	21	-1.429245283	-0.811320755	YANA	3	2.3779	2.3779	NA	2.3779	2.3779	4	2.3779	2.3779	2.3779	NA	2.3779	2.3779	2	2.3779	NA	2.3779	2.3779	2.3779	1	NA	2.3779	2.3779	2.3779
1287	71305	LPB04_2324	120962	2010	968	5	4	15	W9A10COLE	2754	37	18	2	3	RFD	2.0432	g/100g	27/10/10 Lucerne	LAST	W9A10COLE_RFD	-20.5	10.5	-1.429245283	-0.811320755	COLE	2	2.0432	NA	2.0432	2.0432	2.0432	3	2.0432	2.0432	NA	2.0432	2.0432	2.0432	5	2.0432	2.0432	2.0432	2.0432	NA	2	2.0432	NA	2.0432	2.0432
1288	71306	HRZ04_0531	118503	2010	96	5	4	16	W9A10COLE	295	4	67	1	1	IRR	1.7868	g/100g	19/10/2010	LAST	W9A10COLE_IRR	28.5	-22.5	-1.429245283	-0.811320755	COLE	5	1.7868	1.7868	1.7868	1.7868	NA	4	1.7868	1.7868	1.7868	NA	1.7868	1.7868	5	1.7868	1.7868	1.7868	1.7868	NA	3	1.7868	1.7868	NA	1.7868
1289	71307	WW20577	118919	2010	232	5	4	17	W9A10COLE	711	10	27	1	1	IRR	1.6968	g/100g	19/10/2010	LAST	W9A10COLE_IRR	-11.5	-16.5	-1.429245283	-0.811320755	COLE	5	1.6968	1.6968	1.6968	1.6968	NA	2	1.6968	NA	1.6968	1.6968	1.6968	1.6968	1	NA	1.6968	1.6968	1.6968	1.6968	1	NA	1.6968	1.6968	1.6968
1290	71308	WW18791	122103	2010	1368	5	4	18	W9A10COLE	3895	52	19	2	4	IRR	1.9362	g/100g	27/10/10 Lucerne	LAST	W9A10COLE_IRR	-19.5	25.5	-1.429245283	-0.811320755	COLE	5	1.9362	1.9362	1.9362	1.9362	NA	1	NA	1.9362	1.9362	1.9362	1.9362	1.9362	4	1.9362	1.9362	1.9362	NA	1.9362	1	NA	1.9362	1.9362	1.9362
1291	71309	QT13626	122993	2010	1690	5	4	19	W9A10YANA	833	10	41	1	2	RFD	2.361	g/100g	23/10/10 Hurricane	LAST	W9A10YANA_RFD	-3.5	-13	-1.429245283	-0.811320755	YANA	1	NA	2.361	2.361	2.361	2.361	1	NA	2.361	2.361	2.361	2.361	2.361	2	2.361	NA	2.361	2.361	2.361	3	2.361	2.361	NA	2.361
1292	71310	VW0318	118961	2010	246	5	4	20	W9A10COLE	753	10	69	1	1	IRR	1.0951	g/100g	19/10/2010	LAST	W9A10COLE_IRR	30.5	-16.5	-1.429245283	-0.811320755	COLE	5	1.0951	1.0951	1.0951	1.0951	NA	3	1.0951	1.0951	NA	1.0951	1.0951	1.0951	1	NA	1.0951	1.0951	1.0951	1.0951	2	1.0951	NA	1.0951	1.0951
1293	71311	VW2708	122692	2010	1577	5	4	21	W9A10YANA	532	7	4	1	1	IRR	2.1196	g/100g	23/10/10 Lucerne	LAST	W9A10YANA_IRR	-40.5	-16	-1.429245283	-0.811320755	YANA	3	2.1196	2.1196	NA	2.1196	2.1196	1	NA	2.1196	2.1196	2.1196	2.1196	2.1196	5	2.1196	2.1196	2.1196	2.1196	NA	4	2.1196	2.1196	2.1196	NA
1294	71313	WW19891	119243	2010	373	5	4	23	W9A10COLE	1035	14	47	1	2	RFD	1.6986	g/100g	19/10/2010	LAST	W9A10COLE_RFD	8.5	-12.5	-1.429245283	-0.811320755	COLE	1	NA	1.6986	1.6986	1.6986	1.6986	4	1.6986	1.6986	1.6986	NA	1.6986	1.6986	1	NA	1.6986	1.6986	1.6986	1.6986	3	1.6986	1.6986	NA	1.6986
1295	71314	WW20096	120381	2010	750	5	4	24	W9A10COLE	2173	29	45	2	3	RFD	1.7345	g/100g	27/10/10 Lucerne	LAST	W9A10COLE_RFD	6.5	2.5	-1.429245283	-0.811320755	COLE	2	1.7345	NA	1.7345	1.7345	1.7345	2	1.7345	NA	1.7345	1.7345	1.7345	1.7345	1	NA	1.7345	1.7345	1.7345	1.7345	1	NA	1.7345	1.7345	1.7345
1296	71315	HRZ05_0130	119224	2010	362	5	4	25	W9A10COLE	1016	14	28	1	2	RFD	1.9593	g/100g	19/10/2010	LAST	W9A10COLE_RFD	-10.5	-12.5	-1.429245283	-0.811320755	COLE	5	1.9593	1.9593	1.9593	1.9593	NA	2	1.9593	NA	1.9593	1.9593	1.9593	1.9593	5	1.9593	1.9593	1.9593	1.9593	NA	1	NA	1.9593	1.9593	1.9593
1297	71316	QT13626	120629	2010	830	5	4	26	W9A10COLE	2421	32	65	2	3	RFD	2.087	g/100g	27/10/10 Lucerne	LAST	W9A10COLE_RFD	26.5	5.5	-1.429245283	-0.811320755	COLE	1	NA	2.087	2.087	2.087	2.087	1	NA	2.087	2.087	2.087	2.087	2.087	2	2.087	NA	2.087	2.087	2.087	3	2.087	2.087	NA	2.087
1298	71317	RAC1451	124119	2010	2088	5	4	27	W9A10YANA	1959	23	23	1	2	RFD	2.3168	g/100g	23/10/10 Hurricane	LAST	W9A10YANA_RFD	-21.5	0	-1.429245283	-0.811320755	YANA	1	NA	2.3168	2.3168	2.3168	2.3168	3	2.3168	2.3168	NA	2.3168	2.3168	2.3168	4	2.3168	2.3168	2.3168	NA	2.3168	1	NA	2.3168	2.3168	2.3168
1299	71318	VENTURA	119258	2010	381	5	4	28	W9A10COLE	1050	14	62	1	2	RFD	1.3641	g/100g	19/10/2010	LAST	W9A10COLE_RFD	23.5	-12.5	-1.429245283	-0.811320755	COLE	1	NA	1.3641	1.3641	1.3641	1.3641	5	1.3641	1.3641	1.3641	1.3641	NA	1.3641	4	1.3641	1.3641	1.3641	NA	1.3641	4	1.3641	1.3641	1.3641	NA
1300	71319	WW19632	119017	2010	264	5	4	29	W9A10COLE	809	11	49	1	1	IRR	1.7101	g/100g	19/10/2010	LAST	W9A10COLE_IRR	10.5	-15.5	-1.429245283	-0.811320755	COLE	3	1.7101	1.7101	NA	1.7101	1.7101	4	1.7101	1.7101	1.7101	NA	1.7101	1.7101	3	1.7101	1.7101	NA	1.7101	1.7101	2	1.7101	NA	1.7101	1.7101
1301	71320	WW20484	120714	2010	864	5	4	30	W9A10COLE	2506	33	74	2	3	RFD	1.7586	g/100g	27/10/10 Lucerne	LAST	W9A10COLE_RFD	35.5	6.5	-1.429245283	-0.811320755	COLE	4	1.7586	1.7586	1.7586	NA	1.7586	5	1.7586	1.7586	1.7586	1.7586	NA	1.7586	3	1.7586	1.7586	NA	1.7586	1.7586	1	NA	1.7586	1.7586	1.7586
1302	71321	LINCOLN	124281	2010	2140	5	5	1	W9A10YANA	2121	25	9	1	1	IRR	1.8502	g/100g	23/10/10 Lucerne	LAST	W9A10YANA_IRR	-35.5	2	-0.429245283	-0.811320755	YANA	3	1.8502	1.8502	NA	1.8502	1.8502	4	1.8502	1.8502	1.8502	NA	1.8502	1.8502	2	1.8502	NA	1.8502	1.8502	1.8502	4	1.8502	1.8502	1.8502	NA
1303	71322	WW16452	120867	2010	911	5	5	2	W9A10COLE	2659	35	75	2	3	RFD	1.2137	g/100g	27/10/10 Lucerne	LAST	W9A10COLE_RFD	36.5	8.5	-0.429245283	-0.811320755	COLE	2	1.2137	NA	1.2137	1.2137	1.2137	1	NA	1.2137	1.2137	1.2137	1.2137	1.2137	4	1.2137	1.2137	1.2137	NA	1.2137	4	1.2137	1.2137	1.2137	NA
1304	71323	LPB04_2351	124944	2010	2362	5	5	3	W9A10YANA	2784	32	56	2	3	RFD	1.3578	g/100g	30/10/10 Lucerne	LAST	W9A10YANA_RFD	11.5	9	-0.429245283	-0.811320755	YANA	4	1.3578	1.3578	1.3578	NA	1.3578	2	1.3578	NA	1.3578	1.3578	1.3578	1.3578	3	1.3578	1.3578	NA	1.3578	1.3578	4	1.3578	1.3578	1.3578	NA
1305	71324	HRZ05_0224	118407	2010	61	5	5	4	W9A10COLE	199	3	47	1	1	IRR	0.76887	g/100g	23/10/10 Lucerne	LAST	W9A10COLE_IRR	8.5	-23.5	-0.429245283	-0.811320755	COLE	5	0.76887	0.76887	0.76887	0.76887	NA	2	0.76887	NA	0.76887	0.76887	0.76887	0.76887	3	0.76887	0.76887	NA	0.76887	0.76887	4	0.76887	0.76887	0.76887	NA
1306	71325	HRZ06_0043	118701	2010	155	5	5	5	W9A10COLE	493	7	37	1	1	IRR	1.7057	g/100g	19/10/2010	LAST	W9A10COLE_IRR	-1.5	-19.5	-0.429245283	-0.811320755	COLE	5	1.7057	1.7057	1.7057	1.7057	NA	3	1.7057	1.7057	NA	1.7057	1.7057	1.7057	1	NA	1.7057	1.7057	1.7057	1.7057	1	NA	1.7057	1.7057	1.7057
1307	71326	HRZ06_0321	118259	2010	16	5	5	6	W9A10COLE	51	1	51	1	1	IRR	1.3232	g/100g	19/10/2010	LAST	W9A10COLE_IRR	12.5	-25.5	-0.429245283	-0.811320755	COLE	4	1.3232	1.3232	1.3232	NA	1.3232	2	1.3232	NA	1.3232	1.3232	1.3232	1.3232	2	1.3232	NA	1.3232	1.3232	1.3232	4	1.3232	1.3232	1.3232	NA
1308	71327	VW1190	124925	2010	2356	5	5	7	W9A10YANA	2765	32	37	1	2	RFD	2.6575	g/100g	23/10/10 Hurricane	LAST	W9A10YANA_RFD	-7.5	9	-0.429245283	-0.811320755	YANA	4	2.6575	2.6575	2.6575	NA	2.6575	5	2.6575	2.6575	2.6575	2.6575	NA	2.6575	3	2.6575	2.6575	NA	2.6575	2.6575	4	2.6575	2.6575	2.6575	NA
1309	71328	WW19632	122554	2010	1527	5	5	8	W9A10YANA	394	5	42	1	2	RFD	2.4506	g/100g	23/10/10 Lucerne	LAST	W9A10YANA_RFD	-2.5	-18	-0.429245283	-0.811320755	YANA	3	2.4506	2.4506	NA	2.4506	2.4506	4	2.4506	2.4506	2.4506	NA	2.4506	2.4506	3	2.4506	2.4506	NA	2.4506	2.4506	2	2.4506	NA	2.4506	2.4506
1310	71329	WW16612	118602	2010	132	5	5	9	W9A10COLE	394	6	14	1	1	IRR	1.8761	g/100g	12/10/2010	LAST	W9A10COLE_IRR	-24.5	-20.5	-0.429245283	-0.811320755	COLE	2	1.8761	NA	1.8761	1.8761	1.8761	3	1.8761	1.8761	NA	1.8761	1.8761	1.8761	2	1.8761	NA	1.8761	1.8761	1.8761	3	1.8761	1.8761	NA	1.8761
1311	71330	WW18827	120110	2010	674	5	5	10	W9A10COLE	1902	26	2	1	2	RFD	1.4406	g/100g	19/10/2010	LAST	W9A10COLE_RFD	-36.5	-0.5	-0.429245283	-0.811320755	COLE	5	1.4406	1.4406	1.4406	1.4406	NA	5	1.4406	1.4406	1.4406	1.4406	NA	1.4406	3	1.4406	1.4406	NA	1.4406	1.4406	2	1.4406	NA	1.4406	1.4406
1312	71331	WW13710	120762	2010	885	5	5	11	W9A10COLE	2554	34	46	2	3	RFD	1.573	g/100g	27/10/10 Lucerne	LAST	W9A10COLE_RFD	7.5	7.5	-0.429245283	-0.811320755	COLE	5	1.573	1.573	1.573	1.573	NA	4	1.573	1.573	1.573	NA	1.573	1.573	4	1.573	1.573	1.573	NA	1.573	1	NA	1.573	1.573	1.573
1313	71332	WW19473	120218	2010	704	5	5	12	W9A10COLE	2010	27	34	2	3	RFD	1.0652	g/100g	27/10/10 Lucerne	LAST	W9A10COLE_RFD	-4.5	0.5	-0.429245283	-0.811320755	COLE	4	1.0652	1.0652	1.0652	NA	1.0652	4	1.0652	1.0652	1.0652	NA	1.0652	1.0652	1	NA	1.0652	1.0652	1.0652	1.0652	5	1.0652	1.0652	1.0652	1.0652
1314	71333	QT13375	119049	2010	275	5	5	13	W9A10COLE	841	12	5	1	1	IRR	1.3355	g/100g	12/10/2010	LAST	W9A10COLE_IRR	-33.5	-14.5	-0.429245283	-0.811320755	COLE	3	1.3355	1.3355	NA	1.3355	1.3355	3	1.3355	1.3355	NA	1.3355	1.3355	1.3355	4	1.3355	1.3355	1.3355	NA	1.3355	2	1.3355	NA	1.3355	1.3355
1315	71334	WW16367	120309	2010	731	5	5	14	W9A10COLE	2101	28	49	2	3	RFD	2.0399	g/100g	27/10/10 Lucerne	LAST	W9A10COLE_RFD	10.5	1.5	-0.429245283	-0.811320755	COLE	4	2.0399	2.0399	2.0399	NA	2.0399	4	2.0399	2.0399	2.0399	NA	2.0399	2.0399	2	2.0399	NA	2.0399	2.0399	2.0399	3	2.0399	2.0399	NA	2.0399
1316	71335	EGA_WILLS	124902	2010	2348	5	5	15	W9A10YANA	2742	32	14	1	1	IRR	1.7749	g/100g	23/10/10 Lucerne	LAST	W9A10YANA_IRR	-30.5	9	-0.429245283	-0.811320755	YANA	3	1.7749	1.7749	NA	1.7749	1.7749	1	NA	1.7749	1.7749	1.7749	1.7749	1.7749	5	1.7749	1.7749	1.7749	1.7749	NA	2	1.7749	NA	1.7749	1.7749
1317	71336	WW19365	122189	2010	1398	5	5	16	W9A10YANA	29	1	29	1	2	RFD	2.2695	g/100g	23/10/10 Hurricane	LAST	W9A10YANA_RFD	-15.5	-22	-0.429245283	-0.811320755	YANA	5	2.2695	2.2695	2.2695	2.2695	NA	4	2.2695	2.2695	2.2695	NA	2.2695	2.2695	1	NA	2.2695	2.2695	2.2695	2.2695	2	2.2695	NA	2.2695	2.2695
1318	71337	HRZ04_0157	122842	2010	1627	5	5	17	W9A10YANA	682	8	66	2	3	RFD	2.1361	g/100g	30/10/10 Lucerne	LAST	W9A10YANA_RFD	21.5	-15	-0.429245283	-0.811320755	YANA	2	2.1361	NA	2.1361	2.1361	2.1361	5	2.1361	2.1361	2.1361	2.1361	NA	2.1361	2	2.1361	NA	2.1361	2.1361	2.1361	3	2.1361	2.1361	NA	2.1361
1319	71338	HRZ06_0053	120197	2010	698	5	5	18	W9A10COLE	1989	27	13	2	3	RFD	1.2501	g/100g	27/10/10 Lucerne	LAST	W9A10COLE_RFD	-25.5	0.5	-0.429245283	-0.811320755	COLE	4	1.2501	1.2501	1.2501	NA	1.2501	3	1.2501	1.2501	NA	1.2501	1.2501	1.2501	4	1.2501	1.2501	1.2501	NA	1.2501	4	1.2501	1.2501	1.2501	NA
1320	71339	VW3170	124081	2010	2076	5	5	19	W9A10YANA	1921	22	73	2	4	IRR	1.364	g/100g	30/10/10 Hurricane	LAST	W9A10YANA_IRR	28.5	-1	-0.429245283	-0.811320755	YANA	5	1.364	1.364	1.364	1.364	NA	1	NA	1.364	1.364	1.364	1.364	1.364	3	1.364	1.364	NA	1.364	1.364	2	1.364	NA	1.364	1.364
1321	71340	VW1864	121927	2010	1304	5	5	20	W9A10COLE	3719	49	71	2	4	IRR	2.2903	g/100g	27/10/10 Lucerne	LAST	W9A10COLE_IRR	32.5	22.5	-0.429245283	-0.811320755	COLE	5	2.2903	2.2903	2.2903	2.2903	NA	1	NA	2.2903	2.2903	2.2903	2.2903	2.2903	4	2.2903	2.2903	2.2903	NA	2.2903	4	2.2903	2.2903	2.2903	NA
1322	71341	HRZ06_2178	118782	2010	184	5	5	21	W9A10COLE	574	8	42	1	1	IRR	2.2868	g/100g	19/10/2010	LAST	W9A10COLE_IRR	3.5	-18.5	-0.429245283	-0.811320755	COLE	3	2.2868	2.2868	NA	2.2868	2.2868	1	NA	2.2868	2.2868	2.2868	2.2868	2.2868	3	2.2868	2.2868	NA	2.2868	2.2868	5	2.2868	2.2868	2.2868	2.2868
1323	71342	VW3707	125812	2010	2664	5	5	22	W9A10YANA	3652	42	44	1	2	RFD	2.5623	g/100g	23/10/10 Hurricane	LAST	W9A10YANA_RFD	-0.5	19	-0.429245283	-0.811320755	YANA	3	2.5623	2.5623	NA	2.5623	2.5623	1	NA	2.5623	2.5623	2.5623	2.5623	2.5623	3	2.5623	2.5623	NA	2.5623	2.5623	5	2.5623	2.5623	2.5623	2.5623
1324	71343	WW18830	118209	2010	1	5	5	23	W9A10COLE	1	1	1	1	1	IRR	1.1275	g/100g	19/10/2010	LAST	W9A10COLE_IRR	-37.5	-25.5	-0.429245283	-0.811320755	COLE	5	1.1275	1.1275	1.1275	1.1275	NA	2	1.1275	NA	1.1275	1.1275	1.1275	1.1275	4	1.1275	1.1275	1.1275	NA	1.1275	5	1.1275	1.1275	1.1275	1.1275
1325	71344	HRZ04_0111	119182	2010	343	5	5	24	W9A10COLE	974	13	62	1	1	IRR	1.529	g/100g	12/10/2010	LAST	W9A10COLE_IRR	23.5	-13.5	-0.429245283	-0.811320755	COLE	4	1.529	1.529	1.529	NA	1.529	4	1.529	1.529	1.529	NA	1.529	1.529	5	1.529	1.529	1.529	1.529	NA	2	1.529	NA	1.529	1.529
1326	71345	HRZ04_0111	119206	2010	350	5	5	25	W9A10COLE	998	14	10	1	2	RFD	2.6697	g/100g	19/10/2010	LAST	W9A10COLE_RFD	-28.5	-12.5	-0.429245283	-0.811320755	COLE	4	2.6697	2.6697	2.6697	NA	2.6697	4	2.6697	2.6697	2.6697	NA	2.6697	2.6697	5	2.6697	2.6697	2.6697	2.6697	NA	2	2.6697	NA	2.6697	2.6697
1327	71346	EGA_WEDGETAIL	126070	2010	2759	5	5	26	W9A10YANA	3910	45	38	1	2	RFD	1.7691	g/100g	23/10/10 Hurricane	LAST	W9A10YANA_RFD	-6.5	22	-0.429245283	-0.811320755	YANA	5	1.7691	1.7691	1.7691	1.7691	NA	3	1.7691	1.7691	NA	1.7691	1.7691	1.7691	5	1.7691	1.7691	1.7691	1.7691	NA	3	1.7691	1.7691	NA	1.7691
1328	71347	VW2324	119905	2010	599	5	5	27	W9A10COLE	1697	23	25	1	2	RFD	1.5451	g/100g	19/10/2010	LAST	W9A10COLE_RFD	-13.5	-3.5	-0.429245283	-0.811320755	COLE	4	1.5451	1.5451	1.5451	NA	1.5451	3	1.5451	1.5451	NA	1.5451	1.5451	1.5451	5	1.5451	1.5451	1.5451	1.5451	NA	1	NA	1.5451	1.5451	1.5451
1329	71348	SUN534D	125540	2010	2573	5	5	28	W9A10YANA	3380	39	36	1	2	RFD	2.4477	g/100g	23/10/10 Hurricane	LAST	W9A10YANA_RFD	-8.5	16	-0.429245283	-0.811320755	YANA	3	2.4477	2.4477	NA	2.4477	2.4477	2	2.4477	NA	2.4477	2.4477	2.4477	2.4477	1	NA	2.4477	2.4477	2.4477	2.4477	1	NA	2.4477	2.4477	2.4477
1330	71349	LPB04_2172	119777	2010	562	5	5	29	W9A10COLE	1569	21	49	1	2	RFD	2.1953	g/100g	12/10/2010	LAST	W9A10COLE_RFD	10.5	-5.5	-0.429245283	-0.811320755	COLE	1	NA	2.1953	2.1953	2.1953	2.1953	4	2.1953	2.1953	2.1953	NA	2.1953	2.1953	2	2.1953	NA	2.1953	2.1953	2.1953	1	NA	2.1953	2.1953	2.1953
1331	71350	VW0857	123695	2010	1936	5	5	30	W9A10YANA	1535	18	39	1	2	RFD	2.1916	g/100g	23/10/10 Hurricane	LAST	W9A10YANA_RFD	-5.5	-5	-0.429245283	-0.811320755	YANA	5	2.1916	2.1916	2.1916	2.1916	NA	2	2.1916	NA	2.1916	2.1916	2.1916	2.1916	4	2.1916	2.1916	2.1916	NA	2.1916	4	2.1916	2.1916	2.1916	NA
1332	71351	HRZ06_2070	123357	2010	1816	5	6	1	W9A10YANA	1197	14	53	2	3	RFD	1.7884	g/100g	30/10/10 Lucerne	LAST	W9A10YANA_RFD	8.5	-9	0.570754717	-0.811320755	YANA	2	1.7884	NA	1.7884	1.7884	1.7884	4	1.7884	1.7884	1.7884	NA	1.7884	1.7884	4	1.7884	1.7884	1.7884	NA	1.7884	3	1.7884	1.7884	NA	1.7884
1333	71352	CRUSADER	120972	2010	972	5	6	2	W9A10COLE	2764	37	28	2	3	RFD	2.0054	g/100g	27/10/10 Lucerne	LAST	W9A10COLE_RFD	-10.5	10.5	0.570754717	-0.811320755	COLE	2	2.0054	NA	2.0054	2.0054	2.0054	1	NA	2.0054	2.0054	2.0054	2.0054	2.0054	4	2.0054	2.0054	2.0054	NA	2.0054	2	2.0054	NA	2.0054	2.0054
1334	71353	WW20469	124415	2010	2192	5	6	3	W9A10YANA	2255	26	55	2	3	RFD	1.8282	g/100g	30/10/10 Hurricane	LAST	W9A10YANA_RFD	10.5	3	0.570754717	-0.811320755	YANA	4	1.8282	1.8282	1.8282	NA	1.8282	4	1.8282	1.8282	1.8282	NA	1.8282	1.8282	2	1.8282	NA	1.8282	1.8282	1.8282	2	1.8282	NA	1.8282	1.8282
1335	71354	WW20291	124323	2010	2158	5	6	4	W9A10YANA	2163	25	51	2	3	RFD	1.8392	g/100g	30/10/10 Lucerne	LAST	W9A10YANA_RFD	6.5	2	0.570754717	-0.811320755	YANA	4	1.8392	1.8392	1.8392	NA	1.8392	3	1.8392	1.8392	NA	1.8392	1.8392	1.8392	2	1.8392	NA	1.8392	1.8392	1.8392	4	1.8392	1.8392	1.8392	NA
1336	71355	QT13354	122417	2010	1484	5	6	5	W9A10YANA	257	3	81	2	4	IRR	2.2859	g/100g	30/10/10 Hurricane	LAST	W9A10YANA_IRR	36.5	-20	0.570754717	-0.811320755	YANA	3	2.2859	2.2859	NA	2.2859	2.2859	1	NA	2.2859	2.2859	2.2859	2.2859	2.2859	4	2.2859	2.2859	2.2859	NA	2.2859	2	2.2859	NA	2.2859	2.2859
1337	71356	VT1155	120703	2010	862	5	6	6	W9A10COLE	2495	33	63	2	3	RFD	2.444	g/100g	27/10/10 Lucerne	LAST	W9A10COLE_RFD	24.5	6.5	0.570754717	-0.811320755	COLE	2	2.444	NA	2.444	2.444	2.444	4	2.444	2.444	2.444	NA	2.444	2.444	1	NA	2.444	2.444	2.444	2.444	4	2.444	2.444	2.444	NA
1338	71357	HRZ06_2202	121850	2010	1278	5	6	7	W9A10COLE	3642	48	70	2	4	IRR	1.8983	g/100g	27/10/10 Lucerne	LAST	W9A10COLE_IRR	31.5	21.5	0.570754717	-0.811320755	COLE	2	1.8983	NA	1.8983	1.8983	1.8983	5	1.8983	1.8983	1.8983	1.8983	NA	1.8983	1	NA	1.8983	1.8983	1.8983	1.8983	3	1.8983	1.8983	NA	1.8983
1339	71358	WW20383	122272	2010	1431	5	6	8	W9A10YANA	112	2	24	1	2	RFD	2.1987	g/100g	23/10/10 Hurricane	LAST	W9A10YANA_RFD	-20.5	-21	0.570754717	-0.811320755	YANA	4	2.1987	2.1987	2.1987	NA	2.1987	1	NA	2.1987	2.1987	2.1987	2.1987	2.1987	5	2.1987	2.1987	2.1987	2.1987	NA	1	NA	2.1987	2.1987	2.1987
1340	71359	WW20291	122497	2010	1508	5	6	9	W9A10YANA	337	4	73	2	4	IRR	2.127	g/100g	30/10/10 Hurricane	LAST	W9A10YANA_IRR	28.5	-19	0.570754717	-0.811320755	YANA	4	2.127	2.127	2.127	NA	2.127	3	2.127	2.127	NA	2.127	2.127	2.127	2	2.127	NA	2.127	2.127	2.127	4	2.127	2.127	2.127	NA
1341	71360	VW3397	123976	2010	2032	5	6	10	W9A10YANA	1816	21	56	2	3	RFD	1.7351	g/100g	30/10/10 Lucerne	LAST	W9A10YANA_RFD	11.5	-2	0.570754717	-0.811320755	YANA	1	NA	1.7351	1.7351	1.7351	1.7351	5	1.7351	1.7351	1.7351	1.7351	NA	1.7351	5	1.7351	1.7351	1.7351	1.7351	NA	4	1.7351	1.7351	1.7351	NA
1342	71361	SUN570D	122702	2010	1580	5	6	11	W9A10YANA	542	7	14	1	1	IRR	1.8451	g/100g	23/10/10 Lucerne	LAST	W9A10YANA_IRR	-30.5	-16	0.570754717	-0.811320755	YANA	1	NA	1.8451	1.8451	1.8451	1.8451	5	1.8451	1.8451	1.8451	1.8451	NA	1.8451	5	1.8451	1.8451	1.8451	1.8451	NA	4	1.8451	1.8451	1.8451	NA
1343	71362	HRZ05_0145	119084	2010	295	5	6	12	W9A10COLE	876	12	40	1	1	IRR	2.4432	g/100g	12/10/2010	LAST	W9A10COLE_IRR	1.5	-14.5	0.570754717	-0.811320755	COLE	2	2.4432	NA	2.4432	2.4432	2.4432	2	2.4432	NA	2.4432	2.4432	2.4432	2.4432	1	NA	2.4432	2.4432	2.4432	2.4432	1	NA	2.4432	2.4432	2.4432
1344	71363	8890_213	119061	2010	282	5	6	13	W9A10COLE	853	12	17	1	1	IRR	2.0476	g/100g	19/10/2010	LAST	W9A10COLE_IRR	-21.5	-14.5	0.570754717	-0.811320755	COLE	3	2.0476	2.0476	NA	2.0476	2.0476	3	2.0476	2.0476	NA	2.0476	2.0476	2.0476	5	2.0476	2.0476	2.0476	2.0476	NA	1	NA	2.0476	2.0476	2.0476
1345	71364	QT13626	125558	2010	2582	5	6	14	W9A10YANA	3398	39	54	2	3	RFD	1.6718	g/100g	30/10/10 Lucerne	LAST	W9A10YANA_RFD	9.5	16	0.570754717	-0.811320755	YANA	1	NA	1.6718	1.6718	1.6718	1.6718	1	NA	1.6718	1.6718	1.6718	1.6718	1.6718	2	1.6718	NA	1.6718	1.6718	1.6718	3	1.6718	1.6718	NA	1.6718
1346	71365	VW4368	124761	2010	2295	5	6	15	W9A10YANA	2601	30	49	2	3	RFD	1.9056	g/100g	30/10/10 Lucerne	LAST	W9A10YANA_RFD	4.5	7	0.570754717	-0.811320755	YANA	4	1.9056	1.9056	1.9056	NA	1.9056	3	1.9056	1.9056	NA	1.9056	1.9056	1.9056	2	1.9056	NA	1.9056	1.9056	1.9056	1	NA	1.9056	1.9056	1.9056
1347	71366	SUN534D	118747	2010	168	5	6	16	W9A10COLE	539	8	7	1	1	IRR	2.0298	g/100g	12/10/2010	LAST	W9A10COLE_IRR	-31.5	-18.5	0.570754717	-0.811320755	COLE	3	2.0298	2.0298	NA	2.0298	2.0298	2	2.0298	NA	2.0298	2.0298	2.0298	2.0298	1	NA	2.0298	2.0298	2.0298	2.0298	1	NA	2.0298	2.0298	2.0298
1348	71367	GASCOIGNE	125559	2010	2583	5	6	17	W9A10YANA	3399	39	55	2	3	RFD	2.195	g/100g	30/10/10 Lucerne	LAST	W9A10YANA_RFD	10.5	16	0.570754717	-0.811320755	YANA	4	2.195	2.195	2.195	NA	2.195	3	2.195	2.195	NA	2.195	2.195	2.195	5	2.195	2.195	2.195	2.195	NA	5	2.195	2.195	2.195	2.195
1349	71368	HRZ06_0079	125089	2010	2412	5	6	18	W9A10YANA	2929	34	25	1	2	RFD	1.5738	g/100g	23/10/10 Hurricane	LAST	W9A10YANA_RFD	-19.5	11	0.570754717	-0.811320755	YANA	2	1.5738	NA	1.5738	1.5738	1.5738	1	NA	1.5738	1.5738	1.5738	1.5738	1.5738	3	1.5738	1.5738	NA	1.5738	1.5738	4	1.5738	1.5738	1.5738	NA
1350	71369	WW20577	124362	2010	2173	5	6	19	W9A10YANA	2202	26	2	1	1	IRR	1.9111	g/100g	23/10/10 Lucerne	LAST	W9A10YANA_IRR	-42.5	3	0.570754717	-0.811320755	YANA	5	1.9111	1.9111	1.9111	1.9111	NA	2	1.9111	NA	1.9111	1.9111	1.9111	1.9111	1	NA	1.9111	1.9111	1.9111	1.9111	1	NA	1.9111	1.9111	1.9111
1351	71370	WW19565	124821	2010	2319	5	6	20	W9A10YANA	2661	31	21	1	1	IRR	1.488	g/100g	23/10/10 Hurricane	LAST	W9A10YANA_IRR	-23.5	8	0.570754717	-0.811320755	YANA	2	1.488	NA	1.488	1.488	1.488	5	1.488	1.488	1.488	1.488	NA	1.488	5	1.488	1.488	1.488	1.488	NA	5	1.488	1.488	1.488	1.488
1352	71371	HRZ03_0076	121616	2010	1195	5	6	21	W9A10COLE	3408	45	64	2	4	IRR	2.0408	g/100g	27/10/10 Lucerne	LAST	W9A10COLE_IRR	25.5	18.5	0.570754717	-0.811320755	COLE	5	2.0408	2.0408	2.0408	2.0408	NA	1	NA	2.0408	2.0408	2.0408	2.0408	2.0408	3	2.0408	2.0408	NA	2.0408	2.0408	2	2.0408	NA	2.0408	2.0408
1353	71372	WW20159	120672	2010	849	5	6	22	W9A10COLE	2464	33	32	2	3	RFD	1.8025	g/100g	27/10/10 Lucerne	LAST	W9A10COLE_RFD	-6.5	6.5	0.570754717	-0.811320755	COLE	4	1.8025	1.8025	1.8025	NA	1.8025	1	NA	1.8025	1.8025	1.8025	1.8025	1.8025	1	NA	1.8025	1.8025	1.8025	1.8025	3	1.8025	1.8025	NA	1.8025
1354	71373	QT13375	124675	2010	2272	5	6	23	W9A10YANA	2515	29	51	2	3	RFD	2.0555	g/100g	30/10/10 Lucerne	LAST	W9A10YANA_RFD	6.5	6	0.570754717	-0.811320755	YANA	3	2.0555	2.0555	NA	2.0555	2.0555	3	2.0555	2.0555	NA	2.0555	2.0555	2.0555	4	2.0555	2.0555	2.0555	NA	2.0555	2	2.0555	NA	2.0555	2.0555
1355	71374	YENDA	119316	2010	410	5	6	24	W9A10COLE	1108	15	44	1	2	RFD	1.0084	g/100g	19/10/2010	LAST	W9A10COLE_RFD	5.5	-11.5	0.570754717	-0.811320755	COLE	5	1.0084	1.0084	1.0084	1.0084	NA	4	1.0084	1.0084	1.0084	NA	1.0084	1.0084	2	1.0084	NA	1.0084	1.0084	1.0084	1	NA	1.0084	1.0084	1.0084
1356	71375	65211_176	125212	2010	2456	5	6	25	W9A10YANA	3052	35	60	2	3	RFD	2.1574	g/100g	30/10/10 Lucerne	LAST	W9A10YANA_RFD	15.5	12	0.570754717	-0.811320755	YANA	2	2.1574	NA	2.1574	2.1574	2.1574	3	2.1574	2.1574	NA	2.1574	2.1574	2.1574	5	2.1574	2.1574	2.1574	2.1574	NA	3	2.1574	2.1574	NA	2.1574
1357	71376	WW21873	124250	2010	2132	5	6	26	W9A10YANA	2090	24	66	2	3	RFD	1.5968	g/100g	30/10/10 Lucerne	LAST	W9A10YANA_RFD	21.5	1	0.570754717	-0.811320755	YANA	3	1.5968	1.5968	NA	1.5968	1.5968	2	1.5968	NA	1.5968	1.5968	1.5968	1.5968	2	1.5968	NA	1.5968	1.5968	1.5968	3	1.5968	1.5968	NA	1.5968
1358	71377	VV2321	118398	2010	55	5	6	27	W9A10COLE	190	3	38	1	1	IRR	0.99218	g/100g	23/10/10 Lucerne	LAST	W9A10COLE_IRR	-0.5	-23.5	0.570754717	-0.811320755	COLE	1	NA	0.99218	0.99218	0.99218	0.99218	4	0.99218	0.99218	0.99218	NA	0.99218	0.99218	1	NA	0.99218	0.99218	0.99218	0.99218	5	0.99218	0.99218	0.99218	0.99218
[truncated: 4,882 more rows]
[truncated: 37 more columns]
